# Supplementary material
Source: PubMed Central journal article supplement (PMC5730722)
Supplement: MCB.00392-17_zmb001181671s1.pdf [file MCB.00392-17_zmb001181671s1.pdf]

Proteins quantified by SILAC analysis, passing signal to noise (SN) filters in 2 biological replicate experiments (Ex1 highlighted in green; Ex2 highlighted in blue)

WCE=whole cell extract proteome

AV= combined autophagic vesicle fractions

Data are filtered based on the log2 heavy/light ratio for Experiment 1 (Ex1)

| Protein Id                | Gene Symbol | Ex1_WCE_Peptides | Ex1_AV_Peptides | Ex1_ratio_heavy_light_max | Ex2_WCE_Peptides | Ex2_AV_Peptides | Ex2_ratio_heavy_light_max_median |
|---------------------------|-------------|------------------|-----------------|---------------------------|------------------|-----------------|----------------------------------|
| sp Q4G0N4 NAKD2NADK2      |             | 2                | 3               | 4.30773                   | 1                | 1               | 4.17532                          |
| sp P05186 PPBT_HALPL      |             | 6                | 52              | 3.07882                   | 0                | 20              | 2.56278                          |
| sp Q92522 H1X_HIH1FX      |             | 7                | 1               | 2.62362                   | 3                | 1               | -0.190522                        |
| sp Q01974 ROR2_IROR2      |             | 0                | 4               | 2.23932                   | 0                | 4               | 1.09542                          |
| sp O00584 RNT2_FRNASET2   |             | 0                | 3               | 1.99603                   | 1                | 2               | 2.3983                           |
| sp P14384 CBPM_ICPM       |             | 1                | 17              | 1.90352                   | 0                | 6               | 1.76738                          |
| sp Q92820 GGH_HGGH        |             | 8                | 51              | 1.82502                   | 4                | 22              | 1.72739                          |
| sp P00966 ASSY_HASS1      |             | 17               | 27              | 1.82487                   | 14               | 11              | 1.48956                          |
| sp P61081 UBC12_UBE2M     |             | 4                | 3               | 1.77371                   | 1                | 1               | 1.11737                          |
| sp P43003 EAA1_FSLC1A3    |             | 0                | 5               | 1.51697                   | 0                | 3               | 1.61696                          |
| sp Q5VV41 ARHGCGARHGGEF16 |             | 1                | 6               | 1.50533                   | 1                | 1               | 0.585716                         |
| sp P26447 S10A4_S100A4    |             | 7                | 12              | 1.44637                   | 2                | 2               | 1.27314                          |
| sp Q9ULJ7 ANR50_ANKRD50   |             | 0                | 2               | 1.42848                   | 0                | 1               | -0.564853                        |
| sp P06737 PYGL_HPYGL      |             | 40               | 41              | 1.40765                   | 9                | 10              | 1.06961                          |
| sp P60520 GBRL2_GABARAPL2 |             | 2                | 7               | 1.37643                   | 1                | 2               | 1.51682                          |
| sp P07711 CATL1_CTSL      |             | 2                | 6               | 1.37153                   | 1                | 4               | 2.47385                          |
| sp Q6MZW2 FSTL4FSTL4      |             | 0                | 2               | 1.32014                   | 0                | 1               | 0.880128                         |
| sp P28827-2 PTPRIPTPRM    |             | 0                | 6               | 1.30768                   | 0                | 3               | 0.725936                         |
| sp P23381 SYWC_IWARS      |             | 17               | 29              | 1.29051                   | 12               | 16              | 1.18262                          |
| sp P53634 CATC_HCTSC      |             | 5                | 16              | 1.28405                   | 3                | 7               | 1.58575                          |
| sp P17050 NAGAB_NAGA      |             | 1                | 9               | 1.26598                   | 1                | 4               | 0.763819                         |
| sp Q99538 LGMN_LGMN       |             | 1                | 11              | 1.26442                   | 0                | 3               | 1.67979                          |
| sp Q13576 IQGA2_IQGAP2    |             | 28               | 99              | 1.18586                   | 9                | 40              | 0.994698                         |
| sp Q9UM22 EPDR1EPDR1      |             | 0                | 7               | 1.18052                   | 0                | 2               | 1.07866                          |
| sp Q8TBA6 GOGA5GOLGA5     |             | 1                | 10              | 1.17945                   | 0                | 3               | 0.861065                         |
| sp Q14643 ITPR1_ITPR1     |             | 34               | 67              | 1.16182                   | 13               | 28              | 1.0311                           |
| sp Q86WR0 CCD25CCDC25     |             | 4                | 8               | 1.15923                   | 3                | 2               | 0.881613                         |
| sp P07686 HEXB_FHEXB      |             | 12               | 54              | 1.14952                   | 7                | 13              | 1.90771                          |
| sp O00754 MA2B1MAN2B1     |             | 2                | 19              | 1.11088                   | 0                | 8               | 1.05879                          |
| sp O76070 SYUG_FSNCG      |             | 11               | 10              | 1.06306                   | 8                | 3               | 0.847874                         |
| sp P15559 NQO1_INQO1      |             | 12               | 20              | 1.04436                   | 3                | 8               | 0.937766                         |
| sp P32929 CGL_HLCTH       |             | 0                | 6               | 1.04015                   | 0                | 1               | 1.08189                          |
| sp P31327-3 CPSMCP51      |             | 133              | 210             | 1.03859                   | 64               | 116             | 0.835745                         |
| sp Q687X5 STEA4_STEAP4    |             | 0                | 7               | 1.02134                   | 0                | 3               | 0.712758                         |
| sp P49588 SYAC_HAARS      |             | 50               | 63              | 1.00951                   | 32               | 36              | 0.86845                          |
| sp P08243 ASNS_HASNS      |             | 29               | 38              | 1.00694                   | 14               | 24              | 1.01084                          |
| sp Q96L92 SNX27_SNX27     |             | 1                | 1               | 1.00563                   | 1                | 2               | -0.677238                        |
| sp P08236 BGLR_HGUSB      |             | 3                | 32              | 1.003                     | 2                | 22              | 1.15144                          |

|                           |    |    |          |    |    |             |
|---------------------------|----|----|----------|----|----|-------------|
| sp P27658 CO8A1_COL8A1    | 1  | 12 | 0.998339 | 3  | 6  | 1.71423     |
| sp P09234 RU1C_FSNRPC     | 4  | 2  | 0.983241 | 4  | 1  | -0.538472   |
| sp P39880-3 CUX1_CUX1     | 10 | 6  | 0.958945 | 3  | 2  | 1.36694     |
| sp P30838 AL3A1_ALDH3A1   | 5  | 6  | 0.925275 | 4  | 5  | 0.901876    |
| sp P06865 HEXA_FHEXA      | 4  | 26 | 0.911659 | 5  | 8  | 1.32592     |
| sp P06280 AGAL_FGLA       | 1  | 4  | 0.896351 | 1  | 2  | 1.41601     |
| sp A1L170-2 CA22(C1orf226 | 0  | 5  | 0.895956 | 0  | 1  | 0.766763    |
| sp P09104 ENOG_IENO2      | 7  | 2  | 0.892298 | 2  | 1  | 0.40062     |
| sp O75475 PSIP1_IPSIP1    | 24 | 3  | 0.844694 | 9  | 2  | 2.71576     |
| sp Q9H0X4 ITFG3_ITFG3     | 0  | 4  | 0.821844 | 0  | 1  | 0.0908536   |
| sp Q53EL6 PDCD4_PDCD4     | 13 | 5  | 0.81981  | 6  | 2  | 1.30121     |
| sp P12277 KCRB_HCKB       | 30 | 31 | 0.802362 | 9  | 14 | 0.636652    |
| sp Q9Y617 SERC_HPSAT1     | 18 | 26 | 0.79416  | 13 | 13 | 0.805924    |
| sp P08473 NEP_HUMME       | 0  | 8  | 0.793989 | 0  | 2  | 1.07111     |
| sp Q7L1Q6-3 BZW:BZW1      | 23 | 43 | 0.791757 | 13 | 7  | 0.76576     |
| sp P13929 ENOB_IENO3      | 26 | 36 | 0.787998 | 16 | 6  | 1.21538     |
| sp O00625 PIR_HUPIR       | 13 | 16 | 0.786592 | 9  | 8  | 0.771365    |
| sp P49720 PSB3_HPSMB3     | 11 | 6  | 0.784131 | 5  | 2  | 3.05925     |
| sp Q9NRW7 VPS45VPS45      | 1  | 4  | 0.778597 | 0  | 1  | 0.167683    |
| sp Q8NBP7 PCSK9_PCSK9     | 7  | 17 | 0.776383 | 1  | 6  | 0.618407    |
| sp O75391 SPAG7_SPAG7     | 3  | 2  | 0.771842 | 5  | 3  | 0.429593    |
| sp P01903 DRA_HIHLA-DRA   | 0  | 2  | 0.770824 | 0  | 1  | -0.00297111 |
| sp Q9HAT2 SIAE_HSIAE      | 0  | 4  | 0.765676 | 0  | 3  | 0.692624    |
| sp Q99574 NEUS_IERPINI1   | 1  | 4  | 0.752566 | 2  | 4  | 0.90996     |
| sp Q9Y680 FKBP7_FKBP7     | 4  | 12 | 0.748554 | 2  | 3  | 0.765106    |
| sp Q8WW12 PCNP_PCNP       | 8  | 5  | 0.738816 | 4  | 1  | -1.90717    |
| sp O00522 KRIT1_KRIT1     | 0  | 3  | 0.73699  | 0  | 2  | -0.806806   |
| sp Q9H074 PAIP1_PAIP1     | 10 | 7  | 0.691987 | 2  | 3  | 0.248873    |
| sp Q16537 2A5E_FPPP2R5E   | 2  | 5  | 0.680768 | 1  | 1  | 0.242044    |
| sp P25787 PSA2_HPSMA2     | 12 | 12 | 0.669773 | 6  | 5  | 0.404501    |
| sp P35573 GDE_HIAGL       | 12 | 10 | 0.664182 | 5  | 2  | -0.657433   |
| sp Q96EK6 GNA1_GNPAT1     | 10 | 10 | 0.642551 | 2  | 6  | 0.355418    |
| sp Q02790 FKBP4_FKBP4     | 32 | 54 | 0.640339 | 20 | 22 | 0.65362     |
| sp P55327-3 TPD5:TPD52    | 12 | 21 | 0.632623 | 10 | 8  | 0.637283    |
| sp Q9NT62 ATG3_IATG3      | 3  | 2  | 0.615511 | 3  | 4  | 0.460213    |
| sp P16066 ANPRA_NPR1      | 0  | 2  | 0.59755  | 0  | 4  | 1.21227     |
| sp Q96K17 BT3L4_BTFL4     | 13 | 20 | 0.592635 | 9  | 1  | 0.433932    |
| sp Q16719 KYNU_IKYNU      | 21 | 38 | 0.580279 | 13 | 19 | 0.407818    |
| sp Q06323-2 PSMEPSME1     | 14 | 25 | 0.579982 | 9  | 7  | 0.506061    |
| sp P04066 FUCA1_FUCA1     | 0  | 4  | 0.576522 | 0  | 1  | 0.771693    |
| sp Q14166 TTL12_TLL12     | 10 | 5  | 0.576234 | 1  | 2  | 0.316451    |
| sp Q9H4A4 AMPB_RNPEP      | 13 | 13 | 0.574181 | 8  | 4  | 0.320408    |
| sp P34059 GALNS_GALNS     | 0  | 3  | 0.569506 | 0  | 1  | 0.609775    |
| sp Q7Z7H5 TMED4TMED4      | 1  | 5  | 0.567944 | 2  | 5  | 1.29378     |
| sp P37268 FDFT_HFDFT1     | 2  | 13 | 0.567933 | 1  | 1  | 0.11815     |

|                           |    |     |          |    |    |             |
|---------------------------|----|-----|----------|----|----|-------------|
| sp Q14542 S29A2_SLC29A2   | 0  | 5   | 0.566432 | 0  | 5  | 0.130986    |
| sp P49327 FAS_HUFASN      | 97 | 132 | 0.565758 | 51 | 65 | 0.515506    |
| sp O95433 AHS1_AHSA1      | 12 | 9   | 0.544798 | 3  | 1  | 0.376305    |
| sp Q58719 SFT2C_SFT2D3    | 0  | 3   | 0.537112 | 0  | 1  | 0.115996    |
| sp Q72627 HUWE1HUWE1      | 38 | 22  | 0.534759 | 10 | 2  | 0.263159    |
| sp P21266 GSTM3_GSTM3     | 7  | 16  | 0.52954  | 4  | 3  | 0.50139     |
| sp P05161 ISG15_ISG15     | 6  | 6   | 0.527326 | 5  | 3  | 0.574308    |
| sp P60174 TPIS_HITPI1     | 40 | 35  | 0.517671 | 27 | 18 | 0.451096    |
| sp Q8TEQ6 GEM15_GEMIN5    | 24 | 13  | 0.516251 | 8  | 3  | -0.163773   |
| sp Q13907-2 IDI1_IDI1     | 14 | 19  | 0.515194 | 6  | 4  | 0.206249    |
| sp P09874 PARP1_PARP1     | 67 | 16  | 0.513388 | 26 | 2  | 0.208901    |
| sp P41227 NAA10_NAA10     | 22 | 15  | 0.512148 | 19 | 4  | 0.263278    |
| sp P00492 HPRT_HHPRT1     | 10 | 18  | 0.510305 | 7  | 7  | 0.424972    |
| sp P14324 FPPS_HFDPS      | 8  | 13  | 0.509883 | 6  | 4  | 0.567115    |
| sp Q9UBQ6 EXTL2_EXTL2     | 2  | 12  | 0.507924 | 0  | 3  | 0.770003    |
| sp P54802 ANAG_INAGLU     | 0  | 2   | 0.489804 | 0  | 1  | 1.21259     |
| sp A0MZ66-3 SHO_KIAA1598  | 20 | 18  | 0.48141  | 9  | 5  | -0.311219   |
| sp Q14152 EIF3A_ EIF3A    | 33 | 27  | 0.47769  | 2  | 4  | 0.126322    |
| sp O15372 EIF3H_ EIF3H    | 12 | 12  | 0.474462 | 3  | 1  | 0           |
| sp O75874 IDHC_FIDH1      | 22 | 22  | 0.470795 | 13 | 16 | 0.408275    |
| sp Q02818 NUCB1_NUCB1     | 10 | 35  | 0.465217 | 2  | 16 | 0.541636    |
| sp P26583 HMGB2_HMGB2     | 10 | 12  | 0.460697 | 6  | 4  | 0.244216    |
| sp Q16555 DPYL2_DPYSL2    | 15 | 12  | 0.460592 | 3  | 2  | 0.303399    |
| sp Q6NXT4-2 ZNT6_SLC30A6  | 0  | 7   | 0.459376 | 1  | 4  | 0.230055    |
| sp P60900 PSA6_HPMA6      | 5  | 7   | 0.456406 | 0  | 2  | 0.217908    |
| sp Q13510-2 ASAHASAH1     | 5  | 41  | 0.455723 | 3  | 19 | 0.691042    |
| sp Q14244-7 MAP7          | 9  | 1   | 0.455687 | 0  | 1  | 1.59241     |
| sp P05198 IF2A_HIEIF2S1   | 12 | 14  | 0.454657 | 8  | 1  | 0.18057     |
| sp Q96C19 EFHD2_EFHD2     | 3  | 6   | 0.4519   | 2  | 1  | -0.359619   |
| sp P32119 PRDX2_PRDX2     | 5  | 12  | 0.45108  | 5  | 6  | 0.305763    |
| sp Q9NR30 DDX21_DDX21     | 45 | 7   | 0.449802 | 10 | 2  | -0.00862741 |
| sp Q99436 PSB7_PSMB7      | 10 | 15  | 0.436042 | 8  | 2  | 0.084972    |
| sp Q9UQ80 PA2G4_PA2G4     | 35 | 72  | 0.427461 | 19 | 29 | 0.347728    |
| sp O00115 DNS2A_DNASE2    | 1  | 6   | 0.425764 | 0  | 1  | 1.37875     |
| sp Q9BXJ9 NAA15_NAA15     | 26 | 15  | 0.420302 | 12 | 3  | -0.0522461  |
| sp O00220 TR10A_TNFRSF10A | 0  | 3   | 0.410942 | 0  | 3  | 0.467662    |
| sp P49589-3 SYCC_CARS     | 32 | 37  | 0.409201 | 14 | 19 | 0.456509    |
| sp Q9UBQ5 EIF3K_ EIF3K    | 3  | 6   | 0.408645 | 3  | 1  | 0.116536    |
| sp O15371 EIF3D_ EIF3D    | 15 | 13  | 0.40843  | 8  | 8  | 0.433655    |
| sp O94905 ERLN2_ERLN2     | 5  | 18  | 0.407854 | 5  | 10 | 0.457678    |
| sp Q12929 EPS8_HEPS8      | 3  | 4   | 0.404729 | 0  | 2  | 0           |
| sp O75131 CPNE3_CPNE3     | 4  | 1   | 0.400614 | 2  | 1  | 0.649769    |
| sp P31939 PUR9_FATIC      | 38 | 54  | 0.399478 | 32 | 31 | 0.175627    |
| sp P21281 VATB2_ATP6V1B2  | 6  | 15  | 0.398151 | 5  | 8  | 0.00397138  |
| sp P43353 AL3B1_ALDH3B1   | 0  | 3   | 0.394128 | 0  | 3  | 0.435458    |

|                            |     |     |          |    |    |            |
|----------------------------|-----|-----|----------|----|----|------------|
| sp Q9UL46 PSME2_PSME2      | 10  | 15  | 0.392537 | 5  | 5  | 0.53163    |
| sp P52209 6PGD_1PGD        | 23  | 40  | 0.389604 | 14 | 23 | 0.336333   |
| sp Q00688 FKBP3_FKBP3      | 10  | 22  | 0.38822  | 7  | 11 | 0.066452   |
| sp P17174 AATC_1GOT1       | 12  | 8   | 0.387236 | 7  | 1  | 1.34566    |
| sp P25788 PSA3_HPSMA3      | 8   | 5   | 0.385729 | 2  | 1  | 0.25416    |
| sp Q9BZC7-3 ABCAABCA2      | 2   | 7   | 0.3826   | 0  | 2  | -0.290154  |
| sp O15321 TM9S1_TM9SF1     | 0   | 2   | 0.38044  | 0  | 1  | 0.700443   |
| sp O43175 SERA_1PHGDH      | 28  | 58  | 0.364973 | 22 | 38 | 0.367972   |
| sp Q15819 UB2V2_UBE2V2     | 9   | 6   | 0.363535 | 3  | 1  | 0          |
| sp Q9NVT9 ARMC1ARMC1       | 2   | 1   | 0.359165 | 2  | 1  | 0.209168   |
| sp Q9Y5K5 UCHL5_UCHL5      | 10  | 1   | 0.358655 | 3  | 1  | 0.301416   |
| sp P63151-2 2ABA_PPP2R2A   | 8   | 5   | 0.35694  | 5  | 3  | 0.51173    |
| sp Q14789 GOGB1_GOLGB1     | 105 | 212 | 0.35381  | 22 | 72 | 0.346339   |
| sp Q9Y262 EIF3L_1EIF3L     | 16  | 17  | 0.353229 | 6  | 7  | 0.102882   |
| sp Q13126 MTAP_1MTAP       | 14  | 23  | 0.350034 | 8  | 2  | 0.365101   |
| sp P07900-2 HS90_HSP90AA1  | 110 | 154 | 0.340675 | 45 | 70 | 0.531814   |
| sp P04818 TYSY_1TYMS       | 7   | 2   | 0.339661 | 4  | 4  | 0.0780966  |
| sp P39019 RS19_1HRPS19     | 6   | 12  | 0.336907 | 4  | 4  | -0.0156806 |
| sp P52943 CRIP2_1CRIP2     | 6   | 20  | 0.336894 | 5  | 10 | 0.29297    |
| sp Q15181 IPYR_1PPA1       | 21  | 30  | 0.336115 | 14 | 16 | 0.368924   |
| sp Q9NQR4 NIT2_1NIT2       | 7   | 8   | 0.33297  | 2  | 1  | 0.201077   |
| sp P49770 EI2BB_1EIF2B2    | 6   | 4   | 0.331461 | 0  | 1  | 0.154875   |
| sp P11216 PYGB_1PYGB       | 18  | 5   | 0.3308   | 0  | 4  | 0.522234   |
| sp P14868 SYDC_1HDARS      | 23  | 25  | 0.329897 | 11 | 9  | 0.211999   |
| sp Q9UUK9 NUDT5_NUDT5      | 12  | 18  | 0.329558 | 8  | 10 | 0.248283   |
| sp O75608 LYPA1_1LYPLA1    | 6   | 7   | 0.32853  | 2  | 4  | -0.355678  |
| sp P08865 RSSA_1HRPSA      | 17  | 27  | 0.326318 | 9  | 12 | 0.323951   |
| sp Q99613 EIF3C_1EIF3C     | 27  | 22  | 0.326109 | 7  | 7  | 0.581675   |
| sp P32004-2 L1CAL1CAM      | 13  | 90  | 0.320658 | 7  | 56 | 0.541428   |
| sp Q96IU4 ABHEB_1ABHD14B   | 3   | 7   | 0.320123 | 3  | 1  | -0.751076  |
| sp P30086 PEBP1_1PEBP1     | 20  | 32  | 0.316527 | 19 | 11 | 0.567433   |
| sp P49321 NASP_1NASP       | 60  | 11  | 0.313962 | 40 | 5  | -0.413427  |
| sp Q92854 SEM4D_SEMA4D     | 0   | 3   | 0.312287 | 0  | 2  | 0.255248   |
| sp P49755 TMEDA_1TMED10    | 10  | 22  | 0.311213 | 7  | 8  | 0.390099   |
| sp P23526 SAHH_1AHCY       | 31  | 48  | 0.309589 | 16 | 11 | 0.224139   |
| sp Q12874 SF3A3_1SF3A3     | 14  | 2   | 0.308802 | 9  | 2  | 0.778988   |
| sp P30622 CLIP1_1CLIP1     | 50  | 43  | 0.307591 | 9  | 16 | 0.120247   |
| sp Q86Y07 VRK2_1VRK2       | 0   | 2   | 0.307402 | 0  | 2  | -0.632416  |
| sp Q96DG6 CMBL_1CMBL       | 2   | 7   | 0.304811 | 2  | 1  | 0.485813   |
| sp Q93077 H2A1C_1HIST1H2AC | 8   | 5   | 0.304317 | 7  | 1  | 0.207493   |
| sp P55010 IF5_1HUIEIF5     | 13  | 7   | 0.301462 | 2  | 3  | 0.559888   |
| sp Q9Y230 RUVB2_1RUVBL2    | 18  | 30  | 0.299137 | 8  | 13 | 0.404402   |
| sp Q9BRA2 TXD17_1TXNDC17   | 3   | 3   | 0.297489 | 1  | 1  | 0.498685   |
| sp P78417 GSTO1_1GSTO1     | 13  | 9   | 0.294899 | 4  | 4  | 0.348597   |
| sp P62333 PRS10_1PSMC6     | 5   | 5   | 0.291638 | 5  | 3  | -0.262065  |

|                          |     |     |          |    |    |             |
|--------------------------|-----|-----|----------|----|----|-------------|
| sp Q8NHP6 MSPD:MOSPD2    | 1   | 3   | 0.290573 | 0  | 2  | 0.232843    |
| sp Q9NX57 RAB20_RAB20    | 0   | 6   | 0.288304 | 0  | 1  | 0.111433    |
| sp Q04760 LGUL_FGLO1     | 13  | 14  | 0.287388 | 7  | 5  | 0.558374    |
| sp P28074 PSB5_HPSMB5    | 4   | 4   | 0.283984 | 1  | 3  | 0.301561    |
| sp P60228 EIF3E EIF3E    | 13  | 19  | 0.279784 | 8  | 3  | 0           |
| sp Q13310-3 PABP_PABPC4  | 26  | 50  | 0.277893 | 15 | 8  | 0.187733    |
| sp P98082 DAB2_FDAB2     | 18  | 38  | 0.277457 | 6  | 9  | 0.0474818   |
| sp P11586 C1TC_HMTHFD1   | 44  | 100 | 0.276656 | 21 | 48 | 0.111579    |
| sp Q15363 TMED2_TMED2    | 10  | 36  | 0.276181 | 4  | 29 | 0.366362    |
| sp P48637 GSHB_FGSS      | 4   | 4   | 0.272843 | 3  | 2  | 0.266219    |
| sp P0CW22 RS17L_RPS17L   | 16  | 28  | 0.271908 | 10 | 7  | -0.0937412  |
| sp Q9P2J5 SYLC_HIARS     | 65  | 91  | 0.268492 | 27 | 32 | 0.237386    |
| sp P48163 MAOX_ME1       | 9   | 13  | 0.268246 | 4  | 1  | 0.0364921   |
| tr F8W726 F8W72IUBAP2L   | 22  | 10  | 0.267294 | 11 | 3  | 0.410499    |
| sp P20042 IF2B_HI EIF2S2 | 20  | 45  | 0.266597 | 29 | 33 | 0.268868    |
| tr E7EVY3 E7EVY3_CAST    | 2   | 3   | 0.265421 | 4  | 5  | 0.0821419   |
| sp P62269 RS18_HRPS18    | 18  | 18  | 0.261348 | 6  | 7  | -0.129579   |
| sp P41252 SYIC_HIARS     | 43  | 66  | 0.261305 | 16 | 25 | 0.0862547   |
| sp P17858-2 K6PL_PFKL    | 1   | 8   | 0.258101 | 0  | 1  | 0.190786    |
| sp Q9Y266 NUDC_NUDC      | 31  | 49  | 0.257918 | 23 | 12 | 0.270137    |
| sp O95758-4 PTBP.PTBP3   | 8   | 7   | 0.25683  | 2  | 1  | 0.155756    |
| sp Q9Y5Y2 NUBP2_NUBP2    | 3   | 4   | 0.256242 | 1  | 1  | -0.242858   |
| sp Q9UBB4 ATX10_ATXN10   | 8   | 12  | 0.253752 | 8  | 2  | -0.237832   |
| sp P27708 PYR1_HCAD      | 29  | 44  | 0.2521   | 14 | 8  | -0.0272958  |
| sp Q15369 ELOC_FTCEB1    | 3   | 6   | 0.251955 | 2  | 4  | 0.0536688   |
| sp Q13421-2 MSLNMSLN     | 0   | 6   | 0.25134  | 0  | 4  | -0.00165029 |
| sp P78527 PRKDC_PRKDC    | 179 | 96  | 0.25124  | 71 | 24 | 0.0566222   |
| sp P20618 PSB1_HPSMB1    | 6   | 12  | 0.250603 | 6  | 9  | 0.275349    |
| sp Q96EN8 MOCO:MOCOS     | 7   | 11  | 0.249857 | 1  | 4  | 0.392496    |
| sp Q9Y265 RUVB1_RUVBL1   | 21  | 30  | 0.247771 | 12 | 8  | 0.181388    |
| sp Q96KP4 CNDP2_CNDP2    | 23  | 14  | 0.246335 | 16 | 1  | -0.186787   |
| sp Q99497 PARK7_PARK7    | 20  | 34  | 0.243403 | 5  | 5  | 0.0973678   |
| sp P62249 RS16_HRPS16    | 7   | 17  | 0.24327  | 9  | 6  | -0.18751    |
| sp P07814 SYEP_H EPRS    | 123 | 176 | 0.241902 | 51 | 49 | 0.100394    |
| sp P00441 SODC_FSOD1     | 6   | 8   | 0.241759 | 4  | 6  | 0.227073    |
| sp Q7Z2Z2 ETUD1_EFTUD1   | 9   | 8   | 0.239381 | 2  | 5  | -0.0943062  |
| sp P26639-2 SYTC_TARS    | 44  | 64  | 0.236562 | 21 | 36 | 0.195478    |
| sp P40121 CAPG_FCAPG     | 16  | 24  | 0.236152 | 11 | 2  | 0.068089    |
| sp P41091 IF2G_HI EIF2S3 | 11  | 19  | 0.234444 | 16 | 10 | 0.568693    |
| sp P22234-2 PUR6_PAICS   | 14  | 33  | 0.231764 | 11 | 12 | 0.148112    |
| sp P09960 LKHA4_LTA4H    | 33  | 25  | 0.231619 | 21 | 9  | 0.189235    |
| sp Q9NR45 SIAS_HNANS     | 8   | 6   | 0.229086 | 4  | 3  | 0.0930505   |
| sp Q86VS8 HOOK3_HOOK3    | 2   | 9   | 0.228313 | 0  | 1  | 0.276399    |
| sp P10599 THIO_HTXN      | 14  | 15  | 0.226879 | 7  | 6  | 0.269474    |
| sp A5YKK6 CNOT1_CNOT1    | 37  | 28  | 0.226185 | 9  | 2  | 0.156713    |

|                          |     |     |          |     |     |            |
|--------------------------|-----|-----|----------|-----|-----|------------|
| sp P63244 GBLP_HGNB2L1   | 17  | 31  | 0.223825 | 9   | 11  | 0.346276   |
| sp Q8TD16-2 BICD.BICD2   | 10  | 5   | 0.223729 | 0   | 1   | 0.434467   |
| sp P30041 PRDX6_PRDX6    | 20  | 31  | 0.222711 | 6   | 9   | 0.330146   |
| sp P06744 G6PI_H GPI     | 39  | 78  | 0.221539 | 29  | 37  | 0.042415   |
| sp P15848 ARSB_HARSB     | 0   | 7   | 0.220326 | 0   | 1   | 0.302043   |
| sp Q8WWM7-3 ATATXN2L     | 28  | 27  | 0.220092 | 6   | 9   | 0.0902133  |
| sp Q16763 UBE2S_UBE2S    | 2   | 2   | 0.219473 | 2   | 3   | -0.199985  |
| sp P36405 ARL3_HARL3     | 9   | 9   | 0.219369 | 4   | 1   | -0.10656   |
| sp Q6PKG0 LARP1_LARP1    | 26  | 17  | 0.219328 | 3   | 4   | 0.177591   |
| sp P42785 PCP_HLPRCP     | 0   | 21  | 0.219323 | 0   | 5   | 0.259349   |
| sp P06733 ENOA_FENO1     | 202 | 199 | 0.218217 | 143 | 143 | 0.286999   |
| sp P62266 RS23_HRPS23    | 8   | 11  | 0.217995 | 4   | 4   | -0.204107  |
| sp P07741 APT_HLAPRT     | 6   | 6   | 0.217614 | 3   | 3   | 0.0246372  |
| sp Q13228 SBP1_FSELENBP1 | 7   | 6   | 0.216787 | 4   | 3   | 0.503812   |
| sp Q9Y221 NIP7_HNIP7     | 4   | 3   | 0.214317 | 3   | 1   | 0.0587385  |
| sp P62280 RS11_HRPS11    | 9   | 11  | 0.214055 | 4   | 4   | -0.0559981 |
| sp P54577 SYYC_HYARS     | 43  | 76  | 0.212756 | 18  | 30  | 0.161982   |
| sp Q9NP79 VTA1_IVTA1     | 2   | 8   | 0.211625 | 4   | 6   | -0.164712  |
| sp P14550 AK1A1_AKR1A1   | 12  | 18  | 0.210043 | 10  | 6   | 1.07867    |
| sp P63220 RS21_HRPS21    | 6   | 7   | 0.208408 | 10  | 7   | 0.339552   |
| sp Q9NTK5 OLA1_IOLA1     | 25  | 35  | 0.207598 | 12  | 19  | 0.207675   |
| sp Q9HCM3 K1549KIAA1549  | 0   | 10  | 0.206655 | 0   | 1   | -0.326525  |
| sp P63279 UBC9_FUBE2I    | 5   | 5   | 0.206471 | 3   | 1   | 0.0163695  |
| sp P00568 KAD1_FAK1      | 7   | 13  | 0.204769 | 3   | 3   | 0.456588   |
| sp Q7Z4V5 HDGR2_HDGFRP2  | 16  | 2   | 0.204198 | 5   | 2   | -1.12121   |
| sp P07108-5 ACBP_DBI     | 8   | 12  | 0.20081  | 7   | 2   | 0.257482   |
| sp P16333 NCK1_FNCK1     | 0   | 5   | 0.200761 | 0   | 2   | 0.361564   |
| sp Q16880 CGT_HIUGT8     | 0   | 5   | 0.199289 | 0   | 1   | 0.0106616  |
| sp Q9UBK8 MTRR_MTRR      | 2   | 5   | 0.196139 | 1   | 2   | 0.449427   |
| sp O14818 PSA7_FPSMA7    | 6   | 12  | 0.193369 | 3   | 8   | 0.135718   |
| sp O00303 EIF3F EIF3F    | 5   | 5   | 0.192051 | 4   | 1   | 0.319203   |
| sp P09211 GSTP1_GSTP1    | 26  | 25  | 0.188891 | 23  | 15  | 0.43393    |
| sp O43768-4 ENSA_ENSA    | 7   | 14  | 0.188583 | 1   | 2   | 0.337875   |
| sp P15880 RS2_HURPS2     | 16  | 32  | 0.18615  | 8   | 9   | -0.551713  |
| sp P15170-3 ERF3/GSPT1   | 27  | 41  | 0.186128 | 10  | 6   | 0.170718   |
| sp Q96DH6 MSI2H_MSI2     | 7   | 3   | 0.1844   | 3   | 3   | 0.146435   |
| sp Q14C86-6 GAPC_GAPVD1  | 27  | 16  | 0.184117 | 8   | 3   | 0.105323   |
| sp Q9UHL4 DPP2_IDPP7     | 1   | 3   | 0.182543 | 0   | 2   | 1.56718    |
| sp P25789 PSA4_HPSMA4    | 9   | 15  | 0.182431 | 8   | 7   | 0.027943   |
| sp P22314 UBA1_FUBA1     | 43  | 47  | 0.181898 | 16  | 19  | 0.299677   |
| sp P00558 PGK1_FPGK1     | 67  | 117 | 0.181336 | 56  | 50  | 0.0758461  |
| sp P61019 RAB2A_RAB2A    | 3   | 7   | 0.179752 | 4   | 7   | 0.162977   |
| sp P11940 PABP1_PABPC1   | 28  | 51  | 0.179666 | 14  | 16  | 0.173101   |
| sp Q9H098-2 F107_FAM107B | 10  | 11  | 0.175767 | 2   | 2   | 0.325848   |
| sp P68402 PA1B2_PAFAH1B2 | 11  | 14  | 0.174636 | 2   | 1   | -0.0648881 |

|                            |    |    |          |    |    |             |
|----------------------------|----|----|----------|----|----|-------------|
| sp P49591 SYSC_H SARS      | 12 | 25 | 0.173613 | 9  | 5  | 0.264236    |
| sp Q96IJ6-2 GMPP.GMPPA     | 4  | 3  | 0.173298 | 1  | 1  | -0.417896   |
| sp P62316 SMD2_ISNRPD2     | 12 | 14 | 0.17227  | 9  | 1  | -0.571584   |
| sp P49721 PSB2_HPSMB2      | 4  | 6  | 0.170323 | 2  | 1  | 0.290863    |
| sp Q99829 CPNE1_CPNE1      | 11 | 10 | 0.169954 | 5  | 3  | 0.266256    |
| sp Q16527 CSR2_CSRP2       | 5  | 16 | 0.169381 | 1  | 1  | 0.114308    |
| sp O95163 ELP1_HIKBKAP     | 21 | 20 | 0.168933 | 7  | 6  | -0.0812895  |
| sp Q9Y376 CAB39_CAB39      | 5  | 13 | 0.168289 | 1  | 2  | 0.14732     |
| sp P16152 CBR1_HCBR1       | 16 | 27 | 0.167615 | 14 | 11 | -0.584013   |
| sp Q6FI13 H2A2A_HIST2H2AA3 | 19 | 16 | 0.167595 | 13 | 12 | 0.214583    |
| sp P20962 PTMS_FPTMS       | 11 | 1  | 0.166995 | 4  | 2  | 0.508635    |
| sp Q99707 METH_MTR         | 12 | 6  | 0.166524 | 0  | 1  | -0.867734   |
| sp Q9H6T3 RPAP3_RPAP3      | 6  | 12 | 0.165091 | 2  | 3  | 0.108352    |
| sp P16949-2 STMNSTMN1      | 8  | 16 | 0.164135 | 2  | 5  | 0.388899    |
| sp P62701 RS4X_HRP54X      | 26 | 38 | 0.163236 | 25 | 19 | -0.112103   |
| sp P61011 SRP54_SRP54      | 10 | 6  | 0.161716 | 7  | 2  | -0.174792   |
| sp P00390 GSHR_FGSR        | 12 | 17 | 0.160396 | 8  | 2  | 0           |
| sp P11413-2 G6PD_G6PD      | 19 | 24 | 0.160379 | 13 | 12 | 0.251663    |
| sp P21283 VATC1_ATP6V1C1   | 0  | 15 | 0.158565 | 0  | 5  | -0.146118   |
| sp Q9HC38 GLOD4_GLOD4      | 14 | 11 | 0.158272 | 5  | 1  | 0.106844    |
| sp P52565 GDIR1_ARHGDIA    | 17 | 24 | 0.157277 | 12 | 9  | 0.324526    |
| sp Q86UE4 LYRIC_MTDH       | 18 | 67 | 0.153838 | 12 | 26 | 0.000693967 |
| sp Q9HOW9 CK054C11orf54    | 6  | 8  | 0.153253 | 3  | 1  | 0.549748    |
| sp Q9UNH7 SNX6_SNX6        | 5  | 4  | 0.150948 | 2  | 1  | 0.108001    |
| sp Q9UHA4 LATOR3_LAMTOR3   | 4  | 8  | 0.150646 | 0  | 2  | 0.0240817   |
| sp P16401 H15_HLHIST1H1B   | 10 | 13 | 0.150167 | 5  | 5  | 0.208984    |
| sp P29144 TPP2_HTPP2       | 21 | 30 | 0.1473   | 9  | 20 | 0.257369    |
| sp P11766 ADHX_HADH5       | 9  | 23 | 0.147134 | 10 | 10 | 0.207712    |
| sp P20290 BTF3_HBTF3       | 19 | 24 | 0.146915 | 12 | 10 | 0.154158    |
| sp O75832 PSD10_PSM10      | 11 | 9  | 0.146645 | 10 | 1  | 0.575088    |
| sp P47712 PA24A_PLA2G4A    | 22 | 33 | 0.146041 | 6  | 5  | 0.103767    |
| sp A1X283 SPD2B_SH3PXD2B   | 17 | 22 | 0.144761 | 2  | 1  | 0.295685    |
| sp Q8ND56-2 LS14_LSM14A    | 1  | 2  | 0.143756 | 3  | 2  | -0.310911   |
| sp P22102 PUR2_HGART       | 36 | 36 | 0.143641 | 8  | 7  | 0.169587    |
| sp O43237 DC1L2_DYNC1L12   | 8  | 11 | 0.143404 | 0  | 1  | 0.543931    |
| sp Q96KG9 NTKL_HSCYL1      | 17 | 4  | 0.142331 | 8  | 4  | -0.237562   |
| sp Q9NSD9 SYFB_HFARSB      | 17 | 43 | 0.141886 | 11 | 13 | 0.0689879   |
| sp P56192 SYMC_HMARS       | 26 | 40 | 0.140675 | 11 | 30 | 0.0276006   |
| sp P63104 1433Z_YWHAZ      | 17 | 32 | 0.139928 | 23 | 27 | 0.273851    |
| sp O14975 S27A2_SLC27A2    | 0  | 3  | 0.139727 | 0  | 1  | 0.370739    |
| sp P21926 CD9_HLCD9        | 1  | 10 | 0.137345 | 0  | 2  | 0.113523    |
| sp P55884-2 EIF3B_EIF3B    | 37 | 30 | 0.136954 | 10 | 17 | 0.116734    |
| sp O60884 DNJA2_DNAJA2     | 11 | 14 | 0.136861 | 13 | 5  | -0.156185   |
| sp P82979 SARNP_SARNP      | 15 | 2  | 0.132428 | 4  | 1  | -0.701851   |
| sp P20810-6 ICAL_CAST      | 33 | 37 | 0.127483 | 15 | 12 | 0.154157    |

|                          |    |    |           |    |    |            |
|--------------------------|----|----|-----------|----|----|------------|
| sp Q9UBV8 PEF1_PEF1      | 2  | 2  | 0.126233  | 0  | 2  | 0.0755016  |
| sp P28066 PSA5_HPSMA5    | 10 | 17 | 0.125495  | 8  | 4  | -0.136964  |
| sp Q9BY44 EIF2A_EIF2A    | 15 | 19 | 0.125385  | 11 | 11 | -0.188215  |
| sp P29218-3 IMPA_IMPA1   | 3  | 4  | 0.124178  | 3  | 1  | 0.807358   |
| sp P02686 MBP_H MBP      | 0  | 2  | 0.124038  | 0  | 3  | -0.569879  |
| sp Q2PPJ7 RGPA2_RALGAPA2 | 2  | 5  | 0.122285  | 1  | 1  | -0.426199  |
| sp P18669 PGAM1_PGAM1    | 21 | 49 | 0.11532   | 20 | 12 | 0.246101   |
| sp Q6NUQ4 TM21·TMEM214   | 2  | 8  | 0.112033  | 1  | 3  | -0.351648  |
| sp O95486 SC24A_SEC24A   | 8  | 3  | 0.11142   | 0  | 2  | -0.399429  |
| sp O15347 HMGB3_HMGB3    | 10 | 10 | 0.11115   | 10 | 5  | 0.0694911  |
| sp P62841 RS15_HRPS15    | 30 | 41 | 0.110086  | 20 | 8  | -0.108354  |
| sp Q6AI08 HEAT6_HEATR6   | 2  | 2  | 0.109354  | 2  | 3  | -0.0839663 |
| sp P30419 NMT1_INMT1     | 22 | 24 | 0.10888   | 10 | 7  | 0.184222   |
| sp P46781 RS9_HURPS9     | 8  | 13 | 0.108085  | 4  | 3  | -0.256603  |
| sp P45974 UBP5_FUSP5     | 23 | 28 | 0.106882  | 3  | 8  | -0.212701  |
| sp Q13445 TMED1_TMED1    | 3  | 6  | 0.106685  | 2  | 3  | -0.232301  |
| sp P50238 CRIP1_CRIP1    | 4  | 7  | 0.106678  | 2  | 3  | 0.343122   |
| sp Q14444 CAPR1_CAPRIN1  | 24 | 25 | 0.104679  | 5  | 22 | 0.00605096 |
| sp Q9NQ88 TIGAR_TIGAR    | 4  | 4  | 0.104036  | 2  | 3  | 0.722587   |
| sp P30153 2AAA_FPPP2R1A  | 15 | 32 | 0.101757  | 9  | 7  | 0.057975   |
| sp O75821 EIF3G_EIF3G    | 14 | 19 | 0.101513  | 7  | 12 | 0.0814105  |
| sp P55786 PSA_HLNPEPPS   | 56 | 72 | 0.100732  | 18 | 30 | -0.0661485 |
| sp Q92900 RENT1_UPF1     | 17 | 11 | 0.100173  | 7  | 2  | 0.0665401  |
| sp Q13838-2 DX39_DDX39B  | 22 | 9  | 0.100102  | 16 | 3  | -0.173437  |
| sp Q9BVK6 TMED9_TMED9    | 5  | 12 | 0.0987199 | 3  | 6  | 0.168231   |
| sp Q9Y2H6 FND3A_FNDC3A   | 16 | 31 | 0.0980199 | 3  | 10 | 0.381102   |
| sp Q9H788 SH24A_SH2D4A   | 7  | 17 | 0.095812  | 2  | 3  | -0.118292  |
| sp Q9Y547 IFT25_HSPB11   | 3  | 3  | 0.0929305 | 0  | 1  | 2.62851    |
| sp Q06210-2 GFPT_GFPT1   | 15 | 27 | 0.0922187 | 4  | 8  | 0.175959   |
| sp P46783 RS10_HRPS10    | 7  | 11 | 0.0916489 | 4  | 2  | -0.0631037 |
| sp Q9UBW8 CSN7/COPS7A    | 5  | 3  | 0.0907163 | 4  | 1  | 0.154204   |
| sp Q15046-2 SYK_IKARS    | 18 | 17 | 0.0868842 | 11 | 5  | 0          |
| sp P17980 PRS6A_PSMC3    | 28 | 39 | 0.0867358 | 20 | 11 | 0.053412   |
| sp Q9Y2V2 CHSP1_CARHSP1  | 6  | 7  | 0.0853053 | 2  | 1  | 0          |
| sp Q9P289 MST4_IMST4     | 5  | 15 | 0.0852501 | 0  | 1  | 0.129205   |
| sp Q9N2T2 OGFR_OGFR      | 10 | 5  | 0.0850652 | 4  | 6  | -0.2735    |
| sp Q9UQ13 SHOC2_SHOC2    | 0  | 5  | 0.084488  | 0  | 3  | -0.0850257 |
| sp Q14689 DIP2A_DIP2A    | 1  | 2  | 0.08258   | 0  | 2  | -1.27586   |
| sp P61247 RS3A_HRPS3A    | 38 | 81 | 0.0817419 | 13 | 17 | 0          |
| sp Q9Y5S2 MRCKB_CDC42BPB | 9  | 21 | 0.0814261 | 4  | 3  | -0.278057  |
| sp Q92905 CSN5_F_COPS5   | 10 | 8  | 0.0807803 | 3  | 1  | -0.425544  |
| sp Q9Y5B9 SP16H_SUPT16H  | 43 | 7  | 0.0797154 | 10 | 1  | -0.589848  |
| sp P51858 HDGF_FHDGF     | 18 | 10 | 0.078967  | 8  | 2  | -0.0587008 |
| sp Q13765-2 NACA_NACA    | 20 | 37 | 0.0786152 | 15 | 23 | 0.099916   |
| sp P62851 RS25_HRPS25    | 5  | 9  | 0.0758325 | 3  | 3  | -0.151781  |



|                         |    |    |           |    |    |            |
|-------------------------|----|----|-----------|----|----|------------|
| sp P62847-4 RS24_RPS24  | 15 | 18 | 0.0750098 | 4  | 3  | -0.0134199 |
| sp Q98TTO AN32E_ANP32E  | 8  | 2  | 0.0740883 | 8  | 8  | 0.818313   |
| sp Q9H173 SIL1_H_SIL1   | 2  | 9  | 0.0740266 | 1  | 4  | -0.0357638 |
| sp P54136 SYRC_HRARS    | 27 | 44 | 0.0721676 | 12 | 19 | 0.0436887  |
| sp Q9BY67-3 CADN_CADM1  | 1  | 12 | 0.0714398 | 0  | 11 | 0.154723   |
| sp P05362 ICAM1_ICAM1   | 1  | 10 | 0.0714154 | 0  | 4  | 0.190096   |
| sp Q29865 1C18_F_HLA-C  | 0  | 7  | 0.0712793 | 0  | 3  | 0.217823   |
| sp P46782 RS5_HURPS5    | 7  | 11 | 0.0701105 | 4  | 3  | -0.092765  |
| sp O43324 MCA3_EEF1E1   | 9  | 16 | 0.0697725 | 4  | 2  | 0.0827354  |
| sp Q9Y285 SYFA_HFARSA   | 9  | 26 | 0.0696176 | 9  | 20 | -0.233612  |
| sp P00491 PNPH_F_PNP    | 9  | 13 | 0.0690107 | 7  | 2  | 0.421642   |
| sp Q9UMR2 DD19IDD19B    | 13 | 18 | 0.0686177 | 6  | 8  | 0.24688    |
| sp Q96P70 IPO9_HIPO9    | 16 | 16 | 0.0685125 | 3  | 5  | 0.164525   |
| sp P49773 HINT1_IHINT1  | 15 | 2  | 0.0684532 | 7  | 4  | 0.300798   |
| sp Q14240-2 IF4A2EIF4A2 | 18 | 32 | 0.0671741 | 5  | 11 | -0.208593  |
| sp P11908-2 PRPS_PRPS2  | 7  | 4  | 0.0646946 | 0  | 2  | -0.355646  |
| sp Q9NZ53 PDXL2_PODXL2  | 1  | 10 | 0.0645578 | 1  | 4  | -0.0735329 |
| sp P13798 ACPH_F_APEH   | 13 | 37 | 0.0634239 | 8  | 7  | -0.0327182 |
| sp P61513 RL37A_RPL37A  | 0  | 5  | 0.0622884 | 2  | 2  | -0.664245  |
| sp P48029 SC6A8_SLC6A8  | 0  | 8  | 0.0596625 | 0  | 10 | 0.254219   |
| sp Q13283 G3BP1_G3BP1   | 19 | 21 | 0.0588255 | 3  | 6  | -0.252901  |
| sp P23588 IF4B_HIEIF4B  | 17 | 29 | 0.0584131 | 11 | 13 | 0.141735   |
| sp Q08945 SSRP1_SSRP1   | 22 | 4  | 0.0546782 | 5  | 2  | -0.706586  |
| sp P08107 HSP71_HSPA1A  | 50 | 98 | 0.0532054 | 39 | 55 | 0.0319344  |
| sp P14735 IDE_HU_IDE    | 31 | 22 | 0.0508067 | 4  | 3  | -0.423073  |
| sp Q9NQP4 PFD4_PFDN4    | 2  | 3  | 0.0496714 | 3  | 5  | 0.283555   |
| sp P30626 SORCN_SRI     | 4  | 11 | 0.0488787 | 4  | 4  | -0.0299273 |
| sp Q92995 UBP13_USP13   | 6  | 4  | 0.0464373 | 0  | 1  | -0.048194  |
| sp P05386 RLA1_HRPLP1   | 4  | 5  | 0.0458503 | 2  | 4  | -0.352896  |
| sp Q99961 SH3G1_SH3GL1  | 5  | 4  | 0.0454677 | 0  | 2  | 0.141698   |
| sp O15027-5 SC16_SEC16A | 21 | 9  | 0.045341  | 5  | 1  | 0.0366623  |
| sp P10768 ESTD_HESD     | 8  | 12 | 0.0453294 | 5  | 7  | 0.101414   |
| sp P10909-2 CLUS_CLU    | 2  | 11 | 0.0451681 | 0  | 1  | -0.0599101 |
| sp P40925-3 MDH(MDH1    | 13 | 13 | 0.0451608 | 9  | 7  | 0.00934901 |
| sp O14744 ANM5_PRMT5    | 8  | 13 | 0.0438746 | 2  | 4  | 0.071163   |
| sp Q9UKM7 MA1B_MAN1B1   | 5  | 27 | 0.0423917 | 1  | 7  | 0.378577   |
| sp P62241 RS8_HURPS8    | 9  | 14 | 0.042151  | 4  | 10 | -0.0110308 |
| sp P53041 PPP5_HPPP5C   | 2  | 7  | 0.0414156 | 2  | 1  | -0.208214  |
| sp Q96QK1 VPS35_VPS35   | 12 | 28 | 0.0404095 | 8  | 12 | 0.0593612  |
| sp P04080 CYTB_HCSTB    | 7  | 12 | 0.0365091 | 6  | 8  | 0.234148   |
| sp Q9BY32 ITPA_HITPA    | 9  | 13 | 0.0358422 | 5  | 4  | -0.0273564 |
| sp P23396 RS3_HURPS3    | 26 | 61 | 0.0348153 | 14 | 27 | -0.0607267 |
| sp Q16706 MA2A1_MAN2A1  | 5  | 32 | 0.0346451 | 0  | 10 | 0.312558   |
| sp P41250 SYG_HUGARS    | 23 | 54 | 0.0341021 | 15 | 28 | 0.0579518  |
| sp P09417 DHPR_F_QDPR   | 17 | 6  | 0.0338126 | 5  | 5  | -1.32342   |

|                          |    |    |            |    |    |             |
|--------------------------|----|----|------------|----|----|-------------|
| sp Q8TAD4 ZNT5_ISLC30A5  | 0  | 5  | 0.0315013  | 0  | 3  | 0.210562    |
| sp Q14739 LBR_HULBR      | 1  | 7  | 0.0302012  | 0  | 2  | -0.460086   |
| sp O14967 CLGN_FLGN      | 23 | 46 | 0.0293075  | 6  | 20 | 0.169677    |
| sp Q9UHV9 PFD2_PFDN2     | 5  | 6  | 0.0290449  | 3  | 2  | -0.0165814  |
| sp P51665 PSMD7_PSMD7    | 14 | 17 | 0.0278569  | 4  | 5  | -0.21676    |
| sp Q03169 TNAP2_TNFAIP2  | 0  | 4  | 0.0277551  | 0  | 3  | -0.116949   |
| sp O00233 PSMD9_PSMD9    | 4  | 5  | 0.0276149  | 1  | 1  | 0.0584648   |
| sp P61764-2 STXB1STXBP1  | 9  | 35 | 0.0272987  | 2  | 7  | 0.203203    |
| sp O00462 MANB#MANBA     | 1  | 18 | 0.0259317  | 0  | 6  | 1.06695     |
| sp Q0VDF9 HSP7E_HSPA14   | 6  | 2  | 0.0248046  | 0  | 1  | -0.101544   |
| sp P07195 LDHB_FLDB      | 53 | 75 | 0.0245742  | 44 | 52 | 0.0396454   |
| sp P80303-2 NUCBNUCB2    | 19 | 45 | 0.0228656  | 5  | 25 | -0.0182907  |
| sp P07384 CAN1_FCAPN1    | 5  | 10 | 0.0206408  | 2  | 4  | -0.0647952  |
| sp O75569 PRKRA_PRKRA    | 3  | 4  | 0.0205113  | 0  | 1  | 0.180951    |
| sp Q9BUL8 PDC10_PDCD10   | 4  | 16 | 0.0204566  | 3  | 3  | 0.0316899   |
| sp O00299 CLIC1_CLIC1    | 9  | 27 | 0.019724   | 6  | 16 | 0.0163672   |
| sp Q9UHD9 UBQL2UBQLN2    | 5  | 3  | 0.0179886  | 4  | 2  | -0.284654   |
| sp O60841 IF2P_HIEIF5B   | 52 | 53 | 0.0171478  | 17 | 27 | -0.0810119  |
| sp Q12797 ASPH_FASPH     | 26 | 71 | 0.0170377  | 9  | 31 | -0.08048    |
| sp P31948 STIP1_FSTIP1   | 45 | 71 | 0.0169048  | 30 | 24 | -0.161121   |
| sp Q9Y696 CLIC4_FLIC4    | 18 | 50 | 0.0146     | 17 | 24 | 0.0688215   |
| sp P08237-3 K6PF_PFKM    | 10 | 23 | 0.0129337  | 4  | 2  | 0.114223    |
| sp O43776 SYNC_FNARS     | 9  | 17 | 0.0115404  | 5  | 13 | 0.169174    |
| sp Q9UKY7 CDV3_CDV3      | 16 | 14 | 0.0115102  | 8  | 3  | 0.253465    |
| sp P34932 HSP74_HSPA4    | 66 | 73 | 0.00987045 | 23 | 35 | 0.0113471   |
| sp Q9H2G2 SLK_HISLK      | 35 | 77 | 0.00917019 | 19 | 25 | 0.119721    |
| sp P02511 CRYAB_CRYAB    | 2  | 1  | 0.00395585 | 0  | 3  | 0.00485468  |
| sp Q9Y281 COF2_FCL2      | 10 | 17 | 0.00360961 | 5  | 6  | -0.0133752  |
| sp A2RU67 K1467_KIAA1467 | 0  | 7  | 0.00198584 | 0  | 5  | 0.22755     |
| sp Q7Z6K5 ARPIN_ARPIN    | 4  | 2  | 0.00111599 | 1  | 1  | -0.00140395 |
| sp P20645 MPRD_M6PR      | 1  | 2  | 0          | 0  | 1  | 0           |
| sp P51790 CLCN3_CLCN3    | 0  | 1  | 0          | 0  | 1  | 0           |
| sp Q9BTT6 LRRC1_LRRC1    | 0  | 1  | 0          | 0  | 1  | 0           |
| tr J3KS25 J3KS25_HIF4A1  | 1  | 2  | 0          | 0  | 2  | 0           |
| sp Q9NVZ3 NECP2_NECAP2   | 1  | 4  | 0          | 0  | 1  | 0           |
| sp Q01581 HMCS1_HMGCS1   | 7  | 2  | 0          | 2  | 2  | 0           |
| sp Q9NPE3 NOP10_NOP10    | 6  | 1  | 0          | 2  | 1  | 0           |
| sp O14786 NRP1_HNRP1     | 0  | 2  | 0          | 0  | 1  | 0           |
| sp Q9BTE1 DCTN5_DCTN5    | 0  | 2  | 0          | 1  | 1  | 0           |
| sp Q8IWP9 CC28A_CCDC28A  | 0  | 2  | 0          | 0  | 1  | 0           |
| sp Q8IXM6 NRM_FNRM       | 1  | 1  | 0          | 1  | 1  | 0           |
| sp O43813 LANC1_LANCL1   | 3  | 9  | 0          | 2  | 1  | -0.285687   |
| sp Q9NW81-4 AT5_ATP5SL   | 0  | 1  | 0          | 1  | 1  | 0           |
| sp Q9COC4 SEM4C_SEMA4C   | 1  | 2  | 0          | 0  | 4  | 0           |
| sp Q16401 PSMD5_PSMD5    | 5  | 7  | 0          | 4  | 2  | 0.419569    |

|                          |    |     |              |    |    |            |
|--------------------------|----|-----|--------------|----|----|------------|
| sp Q5W111 SPRY7_SPRYD7   | 1  | 2   | 0            | 0  | 1  | 0          |
| sp Q16563 SYPL1_SYPL1    | 3  | 8   | 0            | 1  | 2  | -0.0204741 |
| tr E9PQQ4 E9PQQ_HSPA8    | 2  | 2   | 0            | 2  | 2  | 0          |
| sp Q9UJPI3 FLVC2_FLVCR2  | 0  | 1   | 0            | 0  | 1  | 0          |
| sp Q7Z417 NUFP2_NUFIP2   | 6  | 9   | 0            | 6  | 6  | 0          |
| sp O60831 PRAF2_PRAF2    | 4  | 7   | 0            | 1  | 4  | 0          |
| sp P35244 RFA3_HRPA3     | 7  | 4   | 0            | 4  | 2  | -0.165542  |
| sp P61073-2 CXCR_CXCR4   | 3  | 22  | 0            | 0  | 1  | 0          |
| sp Q6UW78 CK083C11orf83  | 2  | 3   | 0            | 1  | 3  | 0          |
| sp Q9NRX4 PHP14_PHPT1    | 9  | 13  | 0            | 9  | 4  | 0.603345   |
| sp Q13488 VPP3_FT CIRG1  | 0  | 4   | 0            | 0  | 2  | 0          |
| tr E5RGH3 E5RGH3_PABPC1  | 1  | 2   | 0            | 1  | 2  | 0          |
| sp Q9Y2Q5 LTOR2_LAMTOR2  | 0  | 8   | 0            | 1  | 2  | 0.178668   |
| sp Q9GZP9 DERL2_DERL2    | 1  | 3   | 0            | 1  | 2  | 0          |
| sp P35998 PRS7_HPSMC2    | 22 | 29  | 0            | 14 | 6  | -0.536339  |
| sp Q9UBG0 MRC2_MRC2      | 2  | 14  | 0            | 1  | 6  | 0          |
| sp Q9UI12 VATH_FATP6V1H  | 5  | 11  | 0            | 1  | 8  | 0.222747   |
| sp Q9HOU6 RM18_MRPL18    | 2  | 5   | 0            | 3  | 2  | 0          |
| sp Q8TCZ2-5 C99L:CD99L2  | 0  | 5   | 0            | 0  | 3  | 0          |
| sp Q13541 4EBP1 EIF4EBP1 | 3  | 4   | 0            | 5  | 1  | 0          |
| tr H3BR04 H3BR04ALDOA    | 3  | 4   | 0            | 1  | 3  | 0          |
| sp P51798 CLCN7_CLCN7    | 0  | 2   | 0            | 0  | 1  | 0          |
| sp Q9NRR8 C42S1_CDC42SE1 | 0  | 2   | 0            | 0  | 1  | 0          |
| sp O60830-2 TI17BTIMM17B | 1  | 2   | 0            | 0  | 1  | 0          |
| sp Q9BQE3 TBA1C_TUBA1C   | 2  | 4   | 0            | 3  | 7  | 0          |
| sp Q9NX76 CKLF6_CMTM6    | 1  | 4   | 0            | 1  | 1  | 0          |
| sp O76003 GLRX3_GLRX3    | 14 | 15  | 0            | 9  | 6  | -0.29754   |
| sp O14828 SCAM3_SCAMP3   | 6  | 11  | 0            | 4  | 12 | 0          |
| sp P62277 RS13_HRPS13    | 4  | 9   | 0            | 2  | 2  | -0.126127  |
| sp P53801 PTTG_HPTTG1IP  | 1  | 5   | 0            | 1  | 4  | 0          |
| sp P18464 1B51_HHLA-B    | 1  | 18  | 0            | 2  | 15 | 0          |
| sp P31641 SC6A6_SLC6A6   | 0  | 14  | 0            | 0  | 5  | 0          |
| sp P35268 RL22_HRPL22    | 10 | 14  | 0            | 6  | 8  | 0          |
| sp P60842 IF4A1_HEIF4A1  | 28 | 33  | 0            | 22 | 16 | -0.107949  |
| sp Q9HB40 RISC_HSCPEP1   | 15 | 61  | 0            | 3  | 12 | 1.33204    |
| sp Q8NC51-2 PAIR_SERBP1  | 46 | 69  | 0            | 11 | 16 | -0.16164   |
| sp P37802 TAGL2_TAGLN2   | 21 | 40  | 0            | 16 | 26 | 0          |
| sp A6NN79 PERPL_HUMAN    | 2  | 6   | 0            | 0  | 3  | 0          |
| sp P08238 HS90B_HSP90AB1 | 89 | 122 | 0            | 58 | 93 | 0.0173029  |
| sp Q8NC51-3 PAIR_SERBP1  | 6  | 11  | -0.000207672 | 6  | 12 | -0.0942225 |
| sp P51151 RAB9A_RAB9A    | 4  | 15  | -0.000916303 | 0  | 5  | 0.0838946  |
| sp Q92817 EVPL_HEVPL     | 14 | 9   | -0.00129232  | 5  | 1  | 0.128847   |
| sp Q8TB61 S35B2_SLC35B2  | 1  | 7   | -0.00176878  | 0  | 2  | -0.260499  |
| sp O75436 VP26A_VPS26A   | 9  | 4   | -0.00341286  | 4  | 1  | 0.658086   |
| sp O60506 HNRPQSYNCRIP   | 35 | 46  | -0.00398795  | 21 | 23 | 0.063431   |

|                          |    |    |             |    |    |             |
|--------------------------|----|----|-------------|----|----|-------------|
| sp Q9HCS5 E41LA_EPB41L4A | 0  | 5  | -0.00482944 | 0  | 3  | 0.265157    |
| sp Q13409-3 DC11;DYNC1I2 | 10 | 38 | -0.00540095 | 3  | 5  | 0.22409     |
| sp Q9Y5A9 YTHD2_YTHDF2   | 4  | 3  | -0.00552578 | 2  | 1  | 0.251677    |
| sp P43487 RANG_IRANBP1   | 9  | 16 | -0.00590776 | 9  | 4  | 0.000464327 |
| sp Q7L2H7 EIF3M_EIF3M    | 8  | 15 | -0.00596248 | 2  | 3  | 0.371644    |
| sp O95864 FADS2_FADS2    | 3  | 16 | -0.00752558 | 2  | 5  | 0.02371     |
| sp P62826 RAN_HIRAN      | 27 | 25 | -0.00869463 | 14 | 8  | 0.0412138   |
| sp P00533 EGFR_HEGFR     | 6  | 25 | -0.011153   | 2  | 16 | 0.0464712   |
| sp O15438-4 MRP;ABCC3    | 0  | 36 | -0.0112411  | 0  | 12 | -0.0110015  |
| sp P14209 CD99_CD99      | 9  | 30 | -0.0132293  | 3  | 23 | -0.083632   |
| sp Q8TEM1 PO210NUP210    | 27 | 37 | -0.0138459  | 10 | 9  | 0.135522    |
| sp Q8NFJ5 RAI3_H GPRC5A  | 0  | 10 | -0.014138   | 0  | 8  | -0.19335    |
| sp O15320-5 CTGE CTAGE5  | 10 | 16 | -0.0146214  | 1  | 4  | 0.289976    |
| sp P36871-2 PGM1PGM1     | 27 | 27 | -0.016796   | 12 | 8  | -0.0856694  |
| sp Q13442 HAP28_PDAP1    | 11 | 22 | -0.0170723  | 6  | 8  | -0.104036   |
| sp P21399 ACOC_FACO1     | 21 | 40 | -0.0171458  | 5  | 11 | -0.181566   |
| sp P10619 PPGB_FCTSA     | 8  | 27 | -0.0172977  | 3  | 7  | 0.936961    |
| sp Q9H089 LSG1_FLSG1     | 0  | 10 | -0.0176967  | 0  | 1  | 0.056462    |
| sp O75781-2 PALMPALM     | 2  | 27 | -0.0191904  | 0  | 17 | -0.194399   |
| sp Q965B4-3 SRPK.SRPK1   | 10 | 7  | -0.0195269  | 2  | 2  | 0.258392    |
| sp P42166 LAP2A_TMPO     | 12 | 8  | -0.0206346  | 9  | 1  | -0.363357   |
| sp P17931 LEG3_HLGALS3   | 3  | 6  | -0.0211909  | 3  | 3  | -0.0945955  |
| sp Q02750 MP2K1_MAP2K1   | 14 | 17 | -0.0218084  | 11 | 10 | -0.0339908  |
| sp P16278 BGAL_FGLB1     | 9  | 40 | -0.0229003  | 1  | 21 | 1.09569     |
| sp Q00796 DHSO_ISORD     | 10 | 11 | -0.0234099  | 1  | 2  | -0.270586   |
| sp Q13277 STX3_HSTX3     | 0  | 3  | -0.023866   | 0  | 4  | 0.168513    |
| sp Q6UW68 TM20.TMEM205   | 2  | 3  | -0.0240432  | 1  | 1  | 0.0929513   |
| sp P35241 RADI_HRDX      | 22 | 76 | -0.0254101  | 12 | 38 | -0.147026   |
| sp P22392-2 NDKB.NME2    | 56 | 82 | -0.0273711  | 41 | 27 | 0.0695439   |
| sp P62753 RS6_HURPS6     | 9  | 24 | -0.0302145  | 7  | 6  | -0.301923   |
| sp Q15418-2 KS6A.RPS6KA1 | 7  | 17 | -0.0303403  | 2  | 4  | 0.243071    |
| sp Q5QNW6-2 H2EHIST2H2BF | 26 | 20 | -0.0307755  | 12 | 3  | -0.364041   |
| sp Q13177 PAK2_FPAK2     | 12 | 17 | -0.0313533  | 16 | 3  | -0.500359   |
| sp Q9NX62 IMPA3.IMPAD1   | 1  | 8  | -0.032333   | 0  | 2  | -0.238602   |
| sp Q08209 PP2BA_PPP3CA   | 6  | 6  | -0.0339189  | 0  | 2  | -0.318884   |
| sp Q9BTZ2 DHRS4_DHRS4    | 1  | 3  | -0.0354191  | 5  | 5  | 0.196955    |
| sp Q9UHB9 SRP68.SRP68    | 15 | 8  | -0.0361779  | 1  | 1  | -0.570503   |
| sp O75175 CNOT3.CNOT3    | 7  | 6  | -0.0370727  | 6  | 2  | -0.322592   |
| sp P36507 MP2K2_MAP2K2   | 10 | 15 | -0.0380907  | 9  | 4  | 0.0404514   |
| sp Q8IVL6 P3H3_HLEPREL2  | 12 | 25 | -0.0383035  | 1  | 10 | -0.302567   |
| sp Q04637-9 IF4G1EIF4G1  | 69 | 66 | -0.0400626  | 30 | 22 | -0.115997   |
| sp Q13162 PRDX4_PRDX4    | 4  | 11 | -0.0401363  | 6  | 10 | -0.257664   |
| sp Q15185 TEBP_FPTGES3   | 7  | 8  | -0.0407012  | 4  | 2  | 0.207344    |
| sp P05387 RLA2_HRPLP2    | 24 | 35 | -0.0410961  | 21 | 16 | -0.500058   |
| sp Q9UBQ0-2 VPS.VPS29    | 4  | 7  | -0.0421751  | 3  | 1  | -0.56506    |

|                          |     |     |            |    |     |             |
|--------------------------|-----|-----|------------|----|-----|-------------|
| sp Q9NQS3 PVRL3_PVRL3    | 0   | 3   | -0.0431586 | 0  | 3   | 1.22114     |
| sp Q16881 TRXR1_TXNRD1   | 14  | 27  | -0.0443985 | 5  | 6   | -0.191057   |
| sp Q9H6V9-2 CB04C2orf43  | 1   | 1   | -0.0447031 | 2  | 1   | -0.0454205  |
| sp Q9NUM4 T106ETMEM106B  | 0   | 8   | -0.0450928 | 0  | 4   | 0.199396    |
| sp O60271 JIP4_HLSPAG9   | 41  | 15  | -0.045254  | 9  | 3   | 0.345533    |
| sp O60664 PLIN3_PLIN3    | 15  | 19  | -0.0458584 | 9  | 1   | -0.335105   |
| sp Q13085-4 ACACACACA    | 77  | 54  | -0.0461716 | 29 | 12  | -0.174999   |
| sp P06730-2 IF4E_EIF4E   | 8   | 19  | -0.04894   | 4  | 3   | -0.361585   |
| sp Q9NVS9 PNPO_PNPO      | 7   | 12  | -0.0501114 | 2  | 1   | -0.534188   |
| sp P49207 RL34_HRPL34    | 2   | 4   | -0.0505666 | 0  | 1   | -0.446245   |
| sp Q15642 CIP4_HTRIP10   | 3   | 6   | -0.0534905 | 5  | 4   | -0.26727    |
| sp Q99460 PSMD1_PSM1     | 41  | 31  | -0.0540205 | 17 | 8   | -0.243677   |
| sp Q10471 GALT2_GALNT2   | 15  | 66  | -0.0540548 | 9  | 32  | -0.100663   |
| sp Q9BTW9-4 TBCITBCD     | 8   | 6   | -0.0574238 | 1  | 1   | 0.225428    |
| sp P47813 IF1AX_EIF1AX   | 6   | 11  | -0.0581775 | 4  | 1   | -0.129388   |
| sp P62937 PPIA_HIPPIA    | 24  | 19  | -0.0583103 | 6  | 6   | -0.153183   |
| sp Q99733 NP1L4_NAP1L4   | 9   | 12  | -0.0592551 | 7  | 9   | -0.135143   |
| sp Q86SF2 GALT7_GALNT7   | 8   | 36  | -0.0614015 | 0  | 10  | -0.0400049  |
| sp P36941 TNR3_FLTBR     | 0   | 3   | -0.0614897 | 0  | 2   | -0.108599   |
| sp P35658 NU214_NUP214   | 60  | 16  | -0.0619536 | 27 | 1   | -0.543614   |
| sp P61088 UBE2N_UBE2N    | 11  | 26  | -0.0621769 | 8  | 6   | -0.045088   |
| sp Q14204 DYHC1_DYNC1H1  | 215 | 317 | -0.0628083 | 99 | 101 | -0.0536084  |
| sp P63218 GBG5_FGNG5     | 3   | 6   | -0.0632214 | 0  | 4   | -0.214285   |
| sp Q5VYK3 ECM29_ECM29    | 48  | 28  | -0.0635893 | 3  | 5   | 0.0235909   |
| sp Q9Y6E0 STK24_STK24    | 11  | 24  | -0.0643417 | 5  | 7   | 0.170533    |
| sp Q99805 TM9S2_TM9SF2   | 8   | 18  | -0.0646751 | 6  | 18  | 0.0852387   |
| sp O00461 GOLI4_GOLIM4   | 10  | 35  | -0.0657297 | 2  | 15  | -0.358677   |
| sp O94923 GLCE_FGLCE     | 0   | 6   | -0.0657909 | 1  | 2   | 0.10995     |
| sp P35580 MYH10_MYH10    | 3   | 8   | -0.0671402 | 3  | 6   | 0.00894039  |
| sp Q9UP95-7 S12ASLC12A4  | 3   | 7   | -0.0671439 | 0  | 3   | 0.0135427   |
| sp Q8NCW5 NNRE_APOA1BP   | 7   | 11  | -0.0685243 | 8  | 7   | -0.00474066 |
| sp P31150 GDIA_HGDI1     | 26  | 35  | -0.0686388 | 15 | 13  | 0.415081    |
| sp P36404 ARL2_HARL2     | 4   | 9   | -0.0688376 | 0  | 1   | -0.216204   |
| sp Q9UBQ7 GRHPFGRHPR     | 7   | 4   | -0.0696816 | 1  | 1   | -0.224509   |
| sp Q9BRP8 WIBG_WIBG      | 7   | 11  | -0.0700149 | 8  | 2   | 0.0655198   |
| sp Q9BY89 K1671_KIAA1671 | 14  | 20  | -0.0703438 | 5  | 2   | 0.677004    |
| sp P50990 TCPQ_FCCT8     | 44  | 81  | -0.0707448 | 42 | 28  | -0.0812485  |
| sp O15305 PMM2_PMM2      | 5   | 14  | -0.0715305 | 4  | 3   | 0.159122    |
| sp P21980 TGM2_ITGM2     | 20  | 24  | -0.0717886 | 6  | 8   | 0.208885    |
| sp O43242 PSMD3_PSM3     | 22  | 29  | -0.0718921 | 12 | 26  | -0.2439     |
| sp P84098 RL19_HRPL19    | 9   | 17  | -0.0745758 | 1  | 2   | -0.0222302  |
| sp Q92538 GBF1_FGBF1     | 22  | 22  | -0.0752345 | 13 | 4   | -0.056906   |
| sp Q8NI22 MCFD2_MCFD2    | 3   | 14  | -0.0754642 | 4  | 7   | -0.0647062  |
| sp P30457 1A66_HHLA-A    | 1   | 4   | -0.0768077 | 0  | 3   | -0.314195   |
| sp O60427 FADS1_FADS1    | 7   | 16  | -0.0776205 | 2  | 7   | -0.60968    |

|                          |     |     |            |    |    |             |
|--------------------------|-----|-----|------------|----|----|-------------|
| sp Q9HAU0-4 PKH/PLEKHA5  | 9   | 12  | -0.0776483 | 8  | 9  | 0.363877    |
| sp Q3V6T2 GRDN_CCD88A    | 6   | 4   | -0.0786928 | 1  | 1  | -1.3572     |
| sp Q13435 SF3B2_SF3B2    | 54  | 1   | -0.0788943 | 4  | 2  | -0.0301329  |
| sp Q9NZB2-6 F120 FAM120A | 20  | 13  | -0.0790406 | 4  | 4  | -0.547405   |
| sp Q9BZX2 UCK2_FUCK2     | 4   | 1   | -0.0794287 | 1  | 1  | -0.407948   |
| sp Q00535 CDK5_FCDK5     | 10  | 2   | -0.0797988 | 4  | 1  | 0.410699    |
| sp P06753 TPM3_ITPM3     | 12  | 32  | -0.080872  | 5  | 14 | -0.23016    |
| sp Q9H2J7 S6A15_SLC6A15  | 1   | 10  | -0.0815231 | 0  | 3  | -0.127225   |
| sp Q9HA64 KT3K_IFN3KRP   | 4   | 3   | -0.0817956 | 4  | 2  | 0.0609671   |
| sp O95881 TXD12_TXNDC12  | 11  | 24  | -0.0827225 | 3  | 11 | -0.0974732  |
| sp P62081 RS7_HURPS7     | 15  | 28  | -0.0834944 | 9  | 2  | -0.204794   |
| sp Q5VW32 BROX_BROX      | 7   | 7   | -0.0836011 | 6  | 4  | -0.299512   |
| sp Q15008 PSMD6 PSMD6    | 9   | 10  | -0.0845407 | 3  | 4  | -0.193729   |
| sp Q99471 PFD5_FPFDN5    | 11  | 11  | -0.0848231 | 7  | 6  | 0.0221925   |
| sp P09651 ROA1_FHNRNPA1  | 37  | 28  | -0.0853583 | 25 | 16 | -0.238296   |
| sp P47897 SYQ_HLQARS     | 31  | 36  | -0.0857388 | 10 | 10 | -0.0709885  |
| sp Q16531 DDB1_IDDB1     | 39  | 16  | -0.0860183 | 18 | 1  | 0.129942    |
| sp O60488 ACSL4_ACSL4    | 13  | 104 | -0.0870359 | 6  | 49 | -0.153945   |
| sp P30876 RPB2_HPOLR2B   | 11  | 4   | -0.0886113 | 4  | 2  | -0.76861    |
| sp P55072 TERA_HVCP      | 47  | 64  | -0.0895188 | 10 | 18 | 0.00573855  |
| sp P37837 TALDO_TALDO1   | 21  | 15  | -0.0902618 | 16 | 4  | 0.0852735   |
| sp P60891 PRPS1_PRPS1    | 6   | 10  | -0.0903941 | 1  | 1  | 0.579895    |
| sp Q9HC35 EMAL4 EML4     | 9   | 10  | -0.0905962 | 4  | 3  | 0           |
| sp P49792 RBP2_HRANBP2   | 113 | 6   | -0.0909866 | 44 | 1  | 0.288784    |
| sp Q5F1R6-3 DJC2:DNAJC21 | 7   | 5   | -0.0921919 | 5  | 3  | 0.0793489   |
| sp P26640 SYVC_HVARS     | 17  | 14  | -0.092532  | 3  | 5  | 0.0160052   |
| sp O75298 RTN2_FRTN2     | 0   | 1   | -0.0927483 | 0  | 1  | -0.682556   |
| sp Q16864-2 VATF.ATP6V1F | 2   | 2   | -0.0928894 | 1  | 1  | 0.284542    |
| sp Q68EM7 RHG17ARHGAP17  | 25  | 39  | -0.0946078 | 6  | 13 | -0.00858679 |
| sp P00374 DYR_HLDHFR     | 8   | 9   | -0.0949817 | 1  | 1  | -0.341899   |
| sp P43490 NAMPT_NAMPT    | 18  | 17  | -0.0991537 | 8  | 6  | 0.18848     |
| sp O75340 PDCD6_PDCD6    | 5   | 10  | -0.0996011 | 4  | 4  | 0.313866    |
| sp P23142-3 FBLN:FBLN1   | 2   | 5   | -0.10065   | 2  | 3  | -0.142714   |
| sp Q14694-2 UBP1_USP10   | 11  | 10  | -0.100891  | 1  | 3  | -0.0245739  |
| sp P61163 ACTZ_HACTR1A   | 11  | 13  | -0.100904  | 2  | 11 | -0.184046   |
| sp P02545-2 LMNA_LMNA    | 53  | 35  | -0.101333  | 30 | 12 | -0.0342005  |
| sp P00338-3 LDHA_LDHA    | 51  | 65  | -0.101499  | 25 | 38 | -0.0904624  |
| sp Q14155-5 ARHCARHGFE7  | 5   | 14  | -0.102102  | 3  | 3  | -0.351885   |
| sp P38606 VATA_FATP6V1A  | 8   | 28  | -0.104384  | 3  | 10 | 0.131735    |
| sp P13639 EF2_HUEEF2     | 129 | 189 | -0.10648   | 29 | 73 | -0.169749   |
| sp Q15714 T22D1_TSC22D1  | 8   | 3   | -0.107195  | 2  | 1  | 0.0869162   |
| sp P54727 RD23B_RAD23B   | 10  | 7   | -0.107433  | 3  | 2  | 0.0444511   |
| sp P63098 CANB1_PPP3R1   | 6   | 8   | -0.107785  | 4  | 2  | -0.314726   |
| sp O00231-2 PSD1 PSMD11  | 25  | 29  | -0.107842  | 10 | 5  | -0.244792   |
| sp Q9Y5X3 SNX5_FSNX5     | 2   | 2   | -0.111622  | 1  | 2  | -0.0102146  |

|                          |    |    |           |    |    |            |
|--------------------------|----|----|-----------|----|----|------------|
| sp P16402 H13_HUHIST1H1D | 19 | 35 | -0.11179  | 10 | 15 | -0.112259  |
| sp P54578 UBP14_USP14    | 12 | 9  | -0.111962 | 10 | 1  | 0.0175645  |
| sp Q7KZF4 SND1_FSND1     | 34 | 56 | -0.112625 | 18 | 28 | -0.116547  |
| sp Q14980 NUMA:NUMA1     | 70 | 9  | -0.113509 | 31 | 1  | -0.0495517 |
| sp P10155 RO60_FTROVE2   | 8  | 5  | -0.11409  | 5  | 1  | 0.138764   |
| sp P20340-2 RAB6_RAB6A   | 11 | 24 | -0.114283 | 0  | 9  | -0.169116  |
| sp P42677 RS27_HRPS27    | 7  | 11 | -0.114716 | 8  | 6  | -0.379557  |
| sp P52435 RPB11_POLR2J   | 0  | 2  | -0.114887 | 1  | 1  | -0.536336  |
| sp Q92520 FAM3C_FAM3C    | 4  | 20 | -0.115099 | 3  | 11 | -0.0177408 |
| sp P18084 ITB5_HUITGB5   | 3  | 26 | -0.115221 | 0  | 14 | -0.187004  |
| sp P62258 1433E_YWHAE    | 19 | 57 | -0.117438 | 22 | 23 | -0.0390374 |
| sp P36952 SPB5_HSERPINB5 | 28 | 37 | -0.117812 | 19 | 19 | -0.254303  |
| sp Q9Y6M7-13 S4#SLC4A7   | 2  | 75 | -0.118149 | 4  | 33 | -0.123798  |
| sp Q9Y2Z0 SUGT1_SUGT1    | 15 | 18 | -0.120491 | 6  | 3  | 0.0658202  |
| sp P61086 UBE2K_UBE2K    | 3  | 5  | -0.121392 | 2  | 1  | 0.0296526  |
| sp Q9BV86 NTM1ANTMT1     | 1  | 2  | -0.122122 | 2  | 2  | -0.175793  |
| sp P31947 1433S_ISFN     | 21 | 41 | -0.122859 | 14 | 14 | 0.174972   |
| sp Q8NB90 SPAT5_SPATA5   | 10 | 7  | -0.123345 | 2  | 2  | 0.0831704  |
| sp O60869 EDF1_FEDF1     | 6  | 11 | -0.124411 | 6  | 5  | -0.421847  |
| sp P40227 TCPZ_HCCT6A    | 37 | 57 | -0.124869 | 19 | 21 | -0.202294  |
| sp P04062 GLCM_IGBA      | 5  | 19 | -0.127705 | 2  | 10 | -0.274063  |
| sp Q8NE71 ABCF1_ABCF1    | 30 | 52 | -0.130332 | 16 | 35 | -0.151706  |
| sp Q9Y3F4 STRAP_STRAP    | 21 | 30 | -0.130378 | 11 | 9  | -0.211743  |
| sp Q96EY4 TMA16_TMA16    | 2  | 2  | -0.130435 | 1  | 1  | 0.269415   |
| sp Q9BT78 CSN4_FCOPS4    | 5  | 4  | -0.130975 | 3  | 2  | 0.132581   |
| sp P17655 CAN2_FCASN2    | 17 | 10 | -0.132862 | 2  | 5  | -0.115399  |
| sp O75937 DNJC8_DNAJC8   | 16 | 11 | -0.132947 | 6  | 2  | -1.0908    |
| sp P50895 BCAM_BCAM      | 0  | 3  | -0.133145 | 0  | 2  | 0.120631   |
| sp Q13867 BLMH_BLMH      | 7  | 11 | -0.134208 | 1  | 2  | -0.475081  |
| sp Q9HBH5 RDH14RDH14     | 1  | 1  | -0.135997 | 1  | 3  | -0.522103  |
| sp O75534-3 CSDE_CSDE1   | 29 | 34 | -0.137314 | 16 | 10 | -0.0482028 |
| sp O60502 NCOAT_MGEA5    | 12 | 15 | -0.137388 | 6  | 3  | -0.311537  |
| sp P78371 TCPB_HCCT2     | 38 | 66 | -0.138763 | 26 | 33 | -0.15237   |
| sp Q9UNS2 CSN3_COPS3     | 6  | 5  | -0.140743 | 5  | 2  | -1.04605   |
| sp P46777 RL5_HURPL5     | 52 | 80 | -0.140826 | 35 | 50 | -0.379999  |
| sp Q9Y4P3 TBL2_HTBL2     | 2  | 14 | -0.140945 | 0  | 7  | 0.0935235  |
| sp Q15366-5 PCBP_PCBP2   | 23 | 23 | -0.141219 | 14 | 9  | -0.115484  |
| sp Q92504 S39A7_SLC39A7  | 0  | 4  | -0.14243  | 0  | 2  | 0.408059   |
| sp Q9HD45 TM9S3TM9SF3    | 9  | 36 | -0.142547 | 2  | 14 | -0.4669    |
| sp Q8NBZ7-2 UXS1UXS1     | 0  | 5  | -0.143087 | 0  | 1  | 0.152081   |
| sp O43399 TPD54_TPD52L2  | 13 | 33 | -0.143332 | 3  | 5  | -0.0793754 |
| sp O00443 P3C2A_PIK3C2A  | 3  | 3  | -0.14347  | 0  | 2  | -0.838863  |
| sp P62805 H4_HUHIST1H4A  | 24 | 36 | -0.144378 | 17 | 19 | -0.139173  |
| sp P29401-2 TKT_FTCT     | 67 | 75 | -0.14487  | 39 | 29 | -0.121299  |
| sp P55196-5 AFAD_MLLT4   | 3  | 11 | -0.144973 | 1  | 1  | -0.210618  |

|                           |     |     |           |     |     |            |
|---------------------------|-----|-----|-----------|-----|-----|------------|
| sp P50991 TCPD_HCCT4      | 26  | 52  | -0.145576 | 13  | 14  | -0.178587  |
| sp P61769 B2MG_B2M        | 4   | 11  | -0.146259 | 2   | 4   | -0.189491  |
| sp P31946 1433B_YWHAB     | 22  | 38  | -0.148949 | 20  | 20  | -0.202443  |
| sp Q13190 STX5_HSTX5      | 1   | 2   | -0.151131 | 1   | 5   | -0.0618844 |
| sp O43847-2 NRDCNRD1      | 26  | 19  | -0.151688 | 4   | 3   | -0.0170931 |
| sp O43809 CPSF5_NUdT21    | 6   | 8   | -0.15171  | 3   | 3   | -0.461016  |
| sp Q9HBH0 RHOF_RHOF       | 0   | 10  | -0.152452 | 0   | 2   | -0.258397  |
| sp P22059 OSBP1_OSBP      | 9   | 3   | -0.152635 | 3   | 1   | -0.515958  |
| sp Q9HB71 CYBP_FCACYBP    | 27  | 42  | -0.153053 | 20  | 22  | -0.209065  |
| sp P35237 SPB6_HSERPINB6  | 16  | 28  | -0.154777 | 8   | 6   | 0.0925627  |
| sp O00170 AIP_HUAIP       | 9   | 5   | -0.156982 | 7   | 1   | -0.141689  |
| sp P04406 G3P_HLGAPDH     | 173 | 400 | -0.157022 | 117 | 200 | -0.156486  |
| sp P04626 ERBB2_ERBB2     | 1   | 19  | -0.157113 | 0   | 2   | -1.33116   |
| sp P48729 KC1A_HCSNK1A1   | 3   | 6   | -0.159167 | 3   | 1   | -0.687975  |
| sp Q9Y263 PLAP_FPLAA      | 12  | 13  | -0.160408 | 10  | 4   | -0.216776  |
| sp O75822 EIF3J EIF3J     | 18  | 33  | -0.160682 | 16  | 6   | -0.0243903 |
| sp P43034 LIS1_HLPAFAH1B1 | 9   | 20  | -0.160879 | 9   | 12  | -0.210627  |
| sp P51812 KS6A3_RPS6KA3   | 11  | 7   | -0.16202  | 0   | 2   | 0.14518    |
| sp Q5VZK9 LR16A_LRRC16A   | 7   | 9   | -0.163398 | 2   | 7   | -0.216999  |
| sp Q9HCU5 PREB_PREB       | 0   | 4   | -0.164091 | 0   | 2   | -0.38469   |
| sp P62191 PRS4_HPSMC1     | 17  | 14  | -0.164881 | 10  | 10  | -0.0493407 |
| sp P48643 TCPE_HCCT5      | 34  | 60  | -0.165651 | 16  | 24  | -0.152964  |
| sp P12004 PCNA_FPCNA      | 12  | 4   | -0.166287 | 8   | 2   | 0.0575899  |
| sp Q16775 GLO2_HHAGH      | 7   | 12  | -0.166772 | 3   | 2   | -0.119752  |
| sp P25685 DNJB1_DNAJB1    | 11  | 14  | -0.16708  | 5   | 10  | -0.288506  |
| sp P49189 AL9A1_ALDH9A1   | 4   | 3   | -0.167091 | 2   | 1   | -0.63985   |
| sp O94875-11 SRB_SORBS2   | 3   | 18  | -0.167452 | 0   | 2   | -0.13807   |
| sp Q02241 KIF23_KIF23     | 4   | 13  | -0.170683 | 4   | 3   | -0.0451382 |
| sp P46778 RL21_HRPL21     | 10  | 23  | -0.17117  | 9   | 9   | -0.494164  |
| sp Q53TN4 CYBR1_CYBRD1    | 1   | 7   | -0.173379 | 0   | 2   | 0          |
| sp O94760 DDAH1_DDAH1     | 9   | 24  | -0.173427 | 1   | 3   | -0.351593  |
| sp P43686 PRS6B_PSMC4     | 16  | 13  | -0.175069 | 6   | 2   | 0.0859623  |
| sp Q13347 EIF3_HEIF3I     | 14  | 11  | -0.176043 | 12  | 10  | 0.0834711  |
| sp P04075-2 ALDO_ALDOA    | 43  | 51  | -0.176326 | 20  | 33  | 0          |
| sp Q96N67 DOCK7 DOCK7     | 7   | 11  | -0.177895 | 1   | 2   | -0.322747  |
| sp Q9HBL7 PLRKT_PLGRKT    | 0   | 3   | -0.178728 | 1   | 1   | -0.0470489 |
| sp O15397 IPO8_HIPO8      | 9   | 2   | -0.178956 | 5   | 4   | -0.789792  |
| sp P26641 EF1G_HEEF1G     | 19  | 24  | -0.179905 | 7   | 9   | -0.0260517 |
| sp P23229 ITA6_HIITGA6    | 6   | 70  | -0.180601 | 1   | 43  | -0.130448  |
| sp Q86UY6 NAA40_NAA40     | 5   | 3   | -0.180859 | 3   | 2   | -0.0754293 |
| sp P62495 ERF1_HETF1      | 20  | 39  | -0.18147  | 13  | 17  | -0.202948  |
| sp P78344 IF4G2_FEIF4G2   | 42  | 52  | -0.182613 | 5   | 10  | -0.375848  |
| sp Q8WWI1 LMO7_LMO7       | 34  | 43  | -0.182862 | 8   | 23  | -0.203721  |
| sp P08758 ANXA5_ANXA5     | 18  | 36  | -0.185448 | 16  | 16  | -0.265775  |
| sp O00764 PDXK_FPDXK      | 14  | 9   | -0.185479 | 3   | 2   | -0.390365  |



|                           |    |     |           |    |    |             |
|---------------------------|----|-----|-----------|----|----|-------------|
| sp P16989 YBOX3_YBX3      | 10 | 17  | -0.186081 | 8  | 12 | -0.19053    |
| sp P27695 APEX1_APEX1     | 7  | 9   | -0.186111 | 6  | 7  | -0.477769   |
| sp Q99832 TCPH_FCCT7      | 21 | 35  | -0.187054 | 21 | 19 | -0.220956   |
| sp P62899 RL31_H_RPL31    | 4  | 10  | -0.188818 | 1  | 2  | -0.182836   |
| sp P84077 ARF1_HARF1      | 4  | 5   | -0.189441 | 3  | 1  | -0.517945   |
| sp P13693 TCTP_HTPT1      | 18 | 27  | -0.190429 | 8  | 7  | -0.214272   |
| sp Q96BM9 ARL8AARL8A      | 3  | 3   | -0.191311 | 0  | 1  | -0.385916   |
| sp P11171 41_HUNEPB41     | 5  | 59  | -0.191668 | 1  | 33 | -0.269568   |
| sp O95747 OXSR1_OXSR1     | 10 | 14  | -0.192133 | 4  | 2  | -0.994319   |
| sp Q9Y3P9 RBGP1_RABGAP1   | 24 | 9   | -0.192883 | 5  | 2  | 1.41755     |
| sp Q9ULC4-3 MCT:MCTS1     | 5  | 3   | -0.193111 | 2  | 2  | -0.222477   |
| sp Q14914 PTGR1_PTGR1     | 14 | 12  | -0.194148 | 6  | 5  | -0.174948   |
| sp P24534 EF1B_H_EEF1B2   | 22 | 41  | -0.194467 | 16 | 17 | -0.406354   |
| sp Q13200 PSMD2_PSMD2     | 20 | 27  | -0.195355 | 10 | 10 | -0.0657122  |
| sp Q9Y613 FHOD1_FHOD1     | 4  | 24  | -0.195847 | 1  | 4  | -0.100973   |
| sp P35580-4 MYH1MYH10     | 99 | 263 | -0.196034 | 37 | 93 | -0.232421   |
| sp O43583 DENR_IDENR      | 7  | 13  | -0.19674  | 1  | 4  | -0.444304   |
| sp O76094 SRP72_SRP72     | 13 | 9   | -0.197582 | 2  | 2  | -1.16291    |
| sp Q9BRG1 VPS25_VPS25     | 3  | 8   | -0.197674 | 3  | 2  | -0.243578   |
| sp P62913 RL11_H_RPL11    | 6  | 18  | -0.198842 | 7  | 16 | -0.463542   |
| sp Q96H20 SNF8_SNF8       | 1  | 4   | -0.198867 | 0  | 1  | -0.394071   |
| sp Q8WTV0-2 SCRISCARB1    | 3  | 48  | -0.199608 | 4  | 24 | -0.0865025  |
| sp O00425 IF2B3_IGF2BP3   | 25 | 35  | -0.199974 | 4  | 14 | -0.00589992 |
| sp Q5VW38 GP107GPR107     | 2  | 7   | -0.20012  | 0  | 1  | -0.332336   |
| sp Q9BRK5 CAB45_SDF4      | 2  | 30  | -0.200364 | 0  | 11 | -0.206738   |
| sp P68400 CSK21_CSNK2A1   | 9  | 5   | -0.2021   | 6  | 1  | 0.0359208   |
| sp P61254 RL26_H_RPL26    | 12 | 22  | -0.202216 | 4  | 6  | -0.505346   |
| sp Q9Y6E2 BZW2_BZW2       | 11 | 9   | -0.202446 | 4  | 6  | 0.509774    |
| sp P52597 HNRPF_HNRNPF    | 15 | 2   | -0.202607 | 15 | 2  | -0.425475   |
| sp P50395 GDIB_HGDI2      | 23 | 47  | -0.20349  | 17 | 33 | -0.288049   |
| sp P62750 RL23A_RPL23A    | 13 | 37  | -0.203887 | 14 | 16 | -0.388923   |
| sp Q9UDY4 DNJB4_DNAJB4    | 5  | 11  | -0.20694  | 1  | 6  | -0.136923   |
| sp Q86VP6 CAND1_CAND1     | 49 | 68  | -0.208974 | 10 | 25 | -0.141834   |
| sp P52306-5 GDS1_RAP1GDS1 | 5  | 3   | -0.209048 | 2  | 1  | 0           |
| sp Q01628 IFM3_IFITM3     | 5  | 8   | -0.210251 | 3  | 20 | 0.343282    |
| sp P15374 UCHL3_UCHL3     | 9  | 6   | -0.210621 | 4  | 5  | -0.0864398  |
| sp Q9H3U1 UN45AUNC45A     | 19 | 21  | -0.211023 | 7  | 7  | -0.278724   |
| sp Q1KMD3 HNRL:HNRNPUL2   | 46 | 6   | -0.211507 | 21 | 1  | 0.46022     |
| sp Q8NB16 MLKL_MLKL       | 2  | 1   | -0.211814 | 0  | 2  | -2.57852    |
| sp Q9Y4F1-2 FARP_FARP1    | 2  | 50  | -0.212003 | 0  | 7  | -0.194748   |
| sp Q15800 MSMO_MSMO1      | 1  | 10  | -0.212541 | 0  | 3  | -0.29164    |
| sp Q04323-2 UBXN_UBXN1    | 3  | 6   | -0.213137 | 2  | 2  | -0.0393742  |
| sp P07910 HNRPC_HNRNPC    | 10 | 7   | -0.213508 | 9  | 6  | -0.0642407  |
| sp Q00839-2 HNRFHNRNPU    | 4  | 4   | -0.213525 | 2  | 1  | -0.740468   |
| sp P53990-5 IST1_IST1     | 4  | 13  | -0.213549 | 1  | 1  | -0.324896   |

|                          |    |     |           |    |    |             |
|--------------------------|----|-----|-----------|----|----|-------------|
| sp Q92973 TNPO1_TNPO1    | 37 | 46  | -0.214419 | 10 | 14 | 0.0462585   |
| sp Q8N1G4 LRC47_LRRC47   | 5  | 7   | -0.215138 | 4  | 2  | -0.322754   |
| sp O14745 NHRF1_SLC9A3R1 | 11 | 41  | -0.216117 | 5  | 16 | -0.239099   |
| sp O75054 IGSF3_IGSF3    | 1  | 10  | -0.216678 | 0  | 2  | -2.50516    |
| sp O00232 PSD12_PSM12    | 21 | 12  | -0.216757 | 6  | 9  | -0.051072   |
| sp Q86UP2-2 KTN1KTN1     | 2  | 4   | -0.216872 | 0  | 2  | -0.197785   |
| sp Q99614 TTC1_FTTC1     | 4  | 8   | -0.21709  | 4  | 2  | -0.343823   |
| sp Q9C0C2 TB182_TNKS1BP1 | 35 | 48  | -0.22009  | 12 | 9  | -0.209615   |
| sp P12429 ANXA3_ANXA3    | 26 | 29  | -0.223503 | 7  | 9  | -0.0440814  |
| sp Q96JJ3 ELMO2_ELMO2    | 2  | 6   | -0.223825 | 0  | 3  | -0.17194    |
| sp Q01105 SET_HLSET      | 31 | 30  | -0.22509  | 21 | 17 | -0.442788   |
| sp P50502 F10A1_ST13     | 16 | 33  | -0.225315 | 11 | 23 | -0.313059   |
| sp P48507 GSH0_FGCLM     | 5  | 8   | -0.226639 | 4  | 1  | -0.0796108  |
| sp Q9Y3U8 RL36_FRPL36    | 5  | 7   | -0.226963 | 1  | 1  | -0.474761   |
| sp Q8WVC6 DCAKIDCAKD     | 1  | 1   | -0.227583 | 0  | 2  | -0.0310149  |
| sp Q9Y3B4 PM14_SF3B14    | 8  | 4   | -0.228276 | 3  | 1  | -0.555075   |
| sp Q9BZF1 OSBL8_OSBPL8   | 10 | 32  | -0.230782 | 0  | 12 | -0.390462   |
| sp P68363 TBA1B_TUBA1B   | 61 | 114 | -0.231087 | 40 | 65 | -0.257401   |
| sp Q15365 PCBP1_PCBP1    | 22 | 22  | -0.231529 | 18 | 11 | -0.160557   |
| sp P26196 DDX6_FDDX6     | 16 | 24  | -0.232081 | 13 | 5  | -0.467698   |
| sp P18124 RL7_HURPL7     | 19 | 42  | -0.233224 | 6  | 8  | -0.446371   |
| sp Q07960 RHG01_ARHGAP1  | 23 | 20  | -0.233783 | 6  | 2  | -0.637798   |
| sp Q9Y282-3 ERGI:ERGIC3  | 4  | 14  | -0.234001 | 5  | 5  | 0.000698272 |
| sp Q92791 SC65_FLEPREL4  | 3  | 4   | -0.23476  | 0  | 4  | -0.193254   |
| sp Q9BS26 ERP44_ERP44    | 4  | 13  | -0.235602 | 1  | 6  | -0.31715    |
| sp P62829 RL23_HRPL23    | 11 | 20  | -0.236096 | 5  | 5  | -0.492633   |
| sp Q15006 EMC2_EMCC2     | 5  | 11  | -0.237402 | 2  | 2  | 0.00858896  |
| sp Q8NBJ7-3 SUMISUMF2    | 7  | 12  | -0.237601 | 6  | 10 | -0.388754   |
| sp Q5VT25-6 MRCICDC42BPA | 7  | 30  | -0.237741 | 0  | 3  | -0.326167   |
| sp P58546 MTPN_IMTPN     | 6  | 9   | -0.237958 | 4  | 5  | -0.0494199  |
| sp P62195 PRS8_HPSMC5    | 23 | 12  | -0.238162 | 11 | 4  | -0.0979345  |
| sp Q6PGP7 TTC37_TTC37    | 27 | 40  | -0.238767 | 9  | 11 | -0.193845   |
| sp P29692-2 EF1D_EEF1D   | 25 | 27  | -0.238796 | 17 | 18 | -0.18575    |
| sp Q92575 UBXN4_UBXN4    | 3  | 4   | -0.238966 | 1  | 5  | 0           |
| sp P67809 YBOX1_YBX1     | 11 | 26  | -0.240247 | 14 | 25 | -0.430391   |
| sp P06213 INSR_HINSR     | 0  | 10  | -0.24133  | 0  | 2  | -0.0684467  |
| sp Q9P258 RCC2_FRCC2     | 12 | 9   | -0.241997 | 11 | 2  | -0.30857    |
| sp P78362-2 SRPK:SRPK2   | 11 | 7   | -0.24367  | 3  | 4  | 0.268806    |
| sp Q14203-4 DCTNDCTN1    | 36 | 46  | -0.244625 | 13 | 13 | -0.0965082  |
| sp O75179 ANR17_ANKRD17  | 12 | 7   | -0.244822 | 3  | 2  | -1.04198    |
| sp Q8WUM4 PDC6PDCD6IP    | 48 | 58  | -0.245198 | 16 | 27 | -0.244291   |
| sp P49368 TCPG_FTCT3     | 32 | 36  | -0.245764 | 9  | 15 | -0.248612   |
| sp O43414 ERI3_HERI3     | 4  | 4   | -0.245786 | 3  | 1  | -0.0974221  |
| sp P52292 IMA1_FKPNA2    | 11 | 12  | -0.246268 | 6  | 5  | -0.327189   |
| sp O15126 SCAM1_SCAMP1   | 13 | 25  | -0.247185 | 4  | 19 | -0.267715   |

|                          |    |     |           |    |     |            |
|--------------------------|----|-----|-----------|----|-----|------------|
| sp P07099 HYEP_HEPHX1    | 15 | 50  | -0.247625 | 5  | 27  | -0.24285   |
| sp P61956 SUMO2.SUMO2    | 11 | 10  | -0.247824 | 8  | 5   | 0.226823   |
| sp O00571 DDX3X_DDX3X    | 17 | 39  | -0.248321 | 9  | 19  | -0.242393  |
| sp P17987 TCPA_HTCP1     | 30 | 40  | -0.24889  | 11 | 12  | -0.182023  |
| sp P13010 XRCC5_XRCC5    | 62 | 64  | -0.249301 | 27 | 22  | -0.315253  |
| sp Q5T4S7-2 UBR4_UBR4    | 53 | 32  | -0.249422 | 21 | 5   | -0.431611  |
| sp Q92599 SEPT8_8-Sep    | 9  | 19  | -0.25054  | 4  | 12  | -0.476794  |
| sp Q8TAA9 VANG1VANG1     | 0  | 3   | -0.250603 | 0  | 2   | -0.162419  |
| sp P68032 ACTC_HACTC1    | 2  | 2   | -0.251109 | 0  | 4   | -0.733582  |
| sp Q13620 CUL4B_CUL4B    | 30 | 15  | -0.251257 | 11 | 3   | 0.223362   |
| sp P61978-2 HNRP_HNRNPK  | 28 | 24  | -0.252561 | 21 | 13  | -0.0328025 |
| sp P48556 PSMD8_PSMC8    | 20 | 19  | -0.253241 | 14 | 8   | -0.287288  |
| sp P42766 RL35_HRPL35    | 5  | 10  | -0.254336 | 0  | 4   | -0.447741  |
| sp P40222 TXLNA_TXLNA    | 11 | 17  | -0.255037 | 1  | 3   | -0.164684  |
| sp P19338 NUCL_FNCL      | 85 | 71  | -0.255828 | 48 | 38  | -0.23466   |
| sp P07737 PROF1_PFN1     | 51 | 47  | -0.257792 | 36 | 27  | -0.266696  |
| sp P62244 RS15A_RPS15A   | 11 | 14  | -0.25805  | 3  | 6   | -0.409088  |
| sp Q16186 ADRM1ADRM1     | 5  | 1   | -0.260194 | 0  | 1   | -0.113353  |
| sp Q09028 RBBP4_RBBP4    | 13 | 6   | -0.261346 | 10 | 5   | 0.119271   |
| sp P17612 KAPCA_PRKACA   | 2  | 3   | -0.26164  | 2  | 3   | -0.775172  |
| sp Q8IWE2 NXP20_FAM114A1 | 22 | 5   | -0.261866 | 6  | 3   | 0.00713557 |
| sp P83731 RL24_HRPL24    | 9  | 20  | -0.262844 | 3  | 6   | -0.544238  |
| sp Q8IXB1 DJC10_IDNAJC10 | 7  | 22  | -0.263444 | 3  | 8   | -0.176859  |
| sp Q15599 NHRF2_SLC9A3R2 | 0  | 18  | -0.263653 | 0  | 6   | -0.274188  |
| sp O95373 IPO7_HIPO7     | 26 | 30  | -0.263829 | 6  | 16  | -0.0964271 |
| sp P51149 RAB7A_RAB7A    | 12 | 31  | -0.264974 | 7  | 13  | -0.179388  |
| sp Q14258 TRI25_TRIM25   | 18 | 35  | -0.265032 | 8  | 14  | -0.456968  |
| sp Q13561-2 DCTNDCTN2    | 13 | 17  | -0.265778 | 8  | 8   | -0.279165  |
| sp P26038 MOES_IMSN      | 50 | 266 | -0.265872 | 47 | 236 | -0.423109  |
| sp P52732 KIF11_FKIF11   | 17 | 12  | -0.265961 | 6  | 4   | -0.425402  |
| sp Q9ULF5 S39AA_SLC39A10 | 1  | 24  | -0.266053 | 0  | 13  | 0.365168   |
| sp P05455 LA_HUNSSB      | 35 | 12  | -0.266251 | 19 | 3   | -0.0961799 |
| sp Q14554 PDIA5_PDIA5    | 1  | 12  | -0.27109  | 0  | 2   | -0.262763  |
| sp O43292 GPAA1_GPAA1    | 0  | 2   | -0.271373 | 0  | 1   | -0.750405  |
| sp Q658P3-2 STEA_STEAP3  | 1  | 10  | -0.272422 | 0  | 4   | 0.218986   |
| sp P12081 SYHC_HHARS     | 11 | 18  | -0.272522 | 6  | 7   | -0.305964  |
| sp Q08J23 NSUN2_NSUN2    | 31 | 21  | -0.274042 | 16 | 9   | -0.604678  |
| sp P61201-2 CSN2_COPS2   | 14 | 13  | -0.274181 | 8  | 3   | -0.60648   |
| sp Q9Y3C1 NOP16_NOP16    | 8  | 5   | -0.277371 | 5  | 7   | -0.280299  |
| sp Q9UBM7 DHCR_DHCR7     | 3  | 7   | -0.277441 | 4  | 10  | -0.56613   |
| sp Q86UP2 KTN1_IKTN1     | 92 | 192 | -0.278089 | 28 | 83  | -0.363271  |
| sp Q13185 CBX3_FCBX3     | 9  | 9   | -0.278106 | 8  | 5   | -0.318721  |
| sp O75592 MYCB2_MYCBP2   | 16 | 18  | -0.278413 | 3  | 1   | 0.318676   |
| sp P30085 KCY_HL_CMPK1   | 14 | 25  | -0.279687 | 14 | 10  | -0.483464  |
| sp P06703 S10A6_S100A6   | 12 | 12  | -0.279777 | 3  | 11  | -0.461841  |

|                           |     |     |           |    |     |            |
|---------------------------|-----|-----|-----------|----|-----|------------|
| sp Q03518 TAP1_FTAP1      | 2   | 4   | -0.28017  | 3  | 3   | -1.2235    |
| sp P19525 E2AK2_EIF2AK2   | 9   | 13  | -0.280212 | 5  | 3   | -0.0745251 |
| sp Q9UHD8 SEPT9           | 29  | 99  | -0.280366 | 10 | 46  | -0.274346  |
| sp Q8WXX5 DNJC9DNAJC9     | 9   | 6   | -0.281518 | 11 | 2   | 0.300447   |
| sp P48739-2 PIPNEPITPNB   | 11  | 7   | -0.281558 | 6  | 5   | -0.383731  |
| sp Q9NY35 CLDN1_CLDND1    | 1   | 4   | -0.28176  | 0  | 2   | -0.352681  |
| sp O00592 PODXL_PODXL     | 11  | 52  | -0.282456 | 2  | 16  | 0          |
| sp Q9UH65 SWP7CSWAP70     | 16  | 12  | -0.283278 | 6  | 5   | -0.483881  |
| sp P78536 ADA17_ADAM17    | 1   | 26  | -0.283797 | 0  | 3   | -0.114801  |
| sp P26599-3 PTBP:PTBP1    | 27  | 20  | -0.286394 | 10 | 5   | 0.026182   |
| sp Q9Y2W1 TR150_THRAP3    | 28  | 6   | -0.286893 | 6  | 2   | -1.45383   |
| sp P78368 KC1G2_CSNK1G2   | 0   | 3   | -0.287814 | 0  | 2   | -0.36098   |
| sp Q92598 HS105_HSPH1     | 39  | 32  | -0.289138 | 12 | 9   | -0.320258  |
| sp P55060 XPO2_FCSE1L     | 44  | 35  | -0.289198 | 16 | 9   | -0.437143  |
| sp P22626 ROA2_HHNRNPA2B1 | 27  | 20  | -0.290964 | 14 | 10  | -0.39408   |
| sp Q16543 CDC37_CDC37     | 16  | 24  | -0.291553 | 7  | 9   | -0.150152  |
| sp Q12913 PTPRJ_PTPRJ     | 0   | 57  | -0.291919 | 0  | 21  | -0.307153  |
| sp P11142 HSP7C_HSPA8     | 100 | 197 | -0.292167 | 71 | 122 | -0.288098  |
| sp Q99622 C10_HUC12orf57  | 4   | 5   | -0.292988 | 2  | 4   | -0.138213  |
| sp Q92499 DDX1_IDDX1      | 25  | 41  | -0.293781 | 9  | 17  | -0.488314  |
| sp Q96AT9 RPE_HURPE       | 6   | 3   | -0.29412  | 4  | 3   | -0.184428  |
| sp Q15019-2 SEPT:         | 15  | 45  | -0.29646  | 11 | 18  | -0.3963    |
| sp Q15629 TRAM1_TRAM1     | 4   | 5   | -0.296789 | 2  | 4   | -0.417956  |
| sp Q07866-6 KLC1_KLC1     | 19  | 16  | -0.297045 | 5  | 4   | -0.327745  |
| sp Q8NBJ4 GOLM1_GOLM1     | 7   | 8   | -0.297282 | 0  | 2   | -0.600396  |
| sp Q16822 PCKGMPCK2       | 2   | 5   | -0.297964 | 3  | 1   | -0.661786  |
| sp P83881 RL36A_RPL36A    | 1   | 5   | -0.299686 | 3  | 1   | -0.455914  |
| sp P39687 AN32A_ANP32A    | 7   | 7   | -0.299744 | 7  | 3   | -0.139942  |
| sp P11172 UMPS_UMPS       | 10  | 17  | -0.302073 | 2  | 4   | -0.670773  |
| sp Q13393 PLD1_PLD1       | 1   | 21  | -0.302836 | 0  | 5   | -0.365199  |
| sp Q00341 VIGLN_HDLBP     | 74  | 75  | -0.303984 | 28 | 35  | -0.355863  |
| sp Q03519 TAP2_FTAP2      | 0   | 7   | -0.304153 | 0  | 1   | -0.673257  |
| sp Q13308-6 PTK7_PTK7     | 2   | 34  | -0.304356 | 0  | 15  | -0.364982  |
| sp Q9Y520-7 PRC2_PRRC2C   | 65  | 53  | -0.304583 | 26 | 16  | 0.00656891 |
| sp Q9NVJ2 ARL8B_ARL8B     | 6   | 20  | -0.305148 | 4  | 13  | -0.173874  |
| sp P62910 RL32_HRPL32     | 10  | 18  | -0.305731 | 6  | 4   | -0.427996  |
| sp Q99417 MYCBP_MYCBP     | 11  | 16  | -0.306262 | 4  | 1   | -0.279051  |
| sp Q86YQ8 CPNE8_CPNE8     | 2   | 5   | -0.30804  | 0  | 3   | 3.87018    |
| sp P19440 GGT1_FGGT1      | 0   | 1   | -0.309579 | 0  | 1   | 0.12344    |
| sp P55145 MANF_MANF       | 4   | 11  | -0.310658 | 4  | 3   | -0.135712  |
| sp O43447 PPIH_HPPIH      | 5   | 6   | -0.311061 | 8  | 2   | -0.308133  |
| sp Q9Y6G9 DC1L1_DYNC1L1   | 18  | 28  | -0.311918 | 10 | 8   | -0.240895  |
| sp O60888-2 CUTACUTA      | 6   | 4   | -0.314129 | 7  | 3   | -0.468182  |
| sp O43865 SAHH2_AHCYL1    | 6   | 13  | -0.31484  | 0  | 3   | -0.188991  |
| sp O95757 HS74L_HSPA4L    | 24  | 5   | -0.315951 | 3  | 1   | -0.100149  |

|                           |    |     |           |    |    |             |
|---------------------------|----|-----|-----------|----|----|-------------|
| sp Q8TAF3 WDR48WDR48      | 0  | 7   | -0.316067 | 4  | 5  | -0.0284995  |
| sp P36543 VATE1_ATP6V1E1  | 6  | 26  | -0.316631 | 1  | 4  | -0.039437   |
| sp Q13509 TBB3_FTUBB3     | 25 | 37  | -0.318157 | 18 | 25 | -0.361424   |
| sp O15427 MOT4_SLC16A3    | 17 | 54  | -0.318205 | 7  | 16 | -0.356038   |
| sp P40261 NNMT_NNMT       | 10 | 14  | -0.319297 | 5  | 3  | -0.00695501 |
| sp P51991 ROA3_FHNRNPA3   | 19 | 13  | -0.320513 | 17 | 2  | -0.141546   |
| sp Q9UI14 PRAF1_RABAC1    | 1  | 4   | -0.320698 | 0  | 2  | 0.119636    |
| sp P98172 EFNB1_EFNB1     | 0  | 9   | -0.320949 | 1  | 4  | -0.298332   |
| sp P07437 TBB5_HTUBB      | 17 | 24  | -0.321274 | 17 | 20 | -0.383244   |
| sp P40429 RL13A_RPL13A    | 11 | 25  | -0.321949 | 4  | 11 | -0.373993   |
| sp O00186 STXB3_STXBP3    | 2  | 41  | -0.321977 | 1  | 16 | -0.449702   |
| sp Q86V48 LUZP1_LUZP1     | 23 | 24  | -0.322382 | 6  | 15 | -0.354311   |
| sp Q5JRA6 MIA3_FMIA3      | 46 | 102 | -0.323635 | 8  | 35 | -0.112125   |
| sp P61204 ARF3_HARF3      | 19 | 34  | -0.323797 | 16 | 13 | -0.329295   |
| sp Q14573 ITPR3_ITPR3     | 38 | 61  | -0.324961 | 12 | 4  | -0.237894   |
| sp O95394-4 AGM_PGM3      | 8  | 3   | -0.325071 | 3  | 1  | 0.332785    |
| sp Q92542 NICA_FNCSTN     | 1  | 9   | -0.325295 | 1  | 3  | 0           |
| sp P63241-2 IF5A1 EIF5A   | 16 | 11  | -0.32591  | 12 | 11 | -0.230053   |
| sp P62906 RL10A_RPL10A    | 17 | 42  | -0.32598  | 12 | 20 | -0.426524   |
| sp P39023 RL3_HURPL3      | 45 | 104 | -0.326443 | 22 | 56 | -0.256323   |
| sp Q9Y6G5 COMD_COMMD10    | 2  | 6   | -0.326777 | 2  | 1  | -2.69383    |
| sp P27348 1433T_YWHAQ     | 9  | 18  | -0.327043 | 10 | 13 | -0.396263   |
| sp Q9Y5S9 RBM8A_RBM8A     | 2  | 6   | -0.327869 | 3  | 1  | -0.12105    |
| sp Q13443 ADAM5ADAM9      | 2  | 14  | -0.328126 | 0  | 2  | 0           |
| sp A0AVT1 UBA6_UBA6       | 25 | 10  | -0.328801 | 11 | 1  | 0.0804885   |
| sp P53999 TCP4_HSUB1      | 31 | 23  | -0.329438 | 11 | 5  | -0.12492    |
| sp Q15459 SF3A1_SF3A1     | 38 | 9   | -0.329862 | 9  | 5  | -0.215879   |
| sp Q8N257 H2B3B_HIST3H2BB | 6  | 3   | -0.333042 | 2  | 1  | -0.378696   |
| sp P06748 NPM_HNPM1       | 33 | 42  | -0.333613 | 33 | 20 | -0.138261   |
| sp Q96LJ7 DHRS1_DHRS1     | 2  | 2   | -0.333911 | 0  | 1  | 0.0505297   |
| sp Q14974 IMB1_KPNB1      | 36 | 58  | -0.335028 | 11 | 24 | -0.243773   |
| sp P26373 RL13_HRPL13     | 10 | 23  | -0.33576  | 5  | 5  | -0.403648   |
| sp Q93008 USP9X_USP9X     | 38 | 11  | -0.335858 | 13 | 4  | -1.40864    |
| sp O75935 DCTN3_DCTN3     | 1  | 5   | -0.336274 | 1  | 2  | -0.0678299  |
| sp Q6P1N0 C2D1A_CC2D1A    | 6  | 10  | -0.336496 | 2  | 3  | -0.0893193  |
| sp P31949 S10AB_S100A11   | 10 | 21  | -0.33654  | 13 | 10 | -0.167143   |
| sp O43390-2 HNRFHNRNPR    | 31 | 7   | -0.336562 | 20 | 2  | 0.898429    |
| sp Q969T4 UBE2E3_UBE2E3   | 1  | 2   | -0.337219 | 4  | 1  | -0.396355   |
| sp O14531 DPYL4_DPYSL4    | 0  | 2   | -0.337718 | 0  | 1  | -0.901285   |
| sp Q969X5 ERGI1_ERGIC1    | 8  | 23  | -0.338814 | 3  | 5  | -0.288554   |
| sp Q15645 PCH2_FTRIP13    | 10 | 12  | -0.339252 | 5  | 4  | -0.270414   |
| sp P46779-3 RL28_RPL28    | 12 | 21  | -0.339761 | 7  | 6  | -0.527095   |
| sp O43684 BUB3_IBUB3      | 3  | 3   | -0.341388 | 0  | 1  | -0.294036   |
| sp Q12906-7 ILF3_ILF3     | 78 | 39  | -0.342247 | 30 | 13 | -0.716269   |
| sp Q9Y3A6 TMED5_TMED5     | 2  | 9   | -0.342271 | 0  | 1  | 0.26979     |

|                          |    |     |           |    |    |            |
|--------------------------|----|-----|-----------|----|----|------------|
| sp O60610 DIAP1_DIAPH1   | 39 | 41  | -0.342682 | 4  | 3  | -0.302597  |
| sp Q6UXH1-5 CRELCRELD2   | 1  | 7   | -0.343098 | 0  | 2  | -0.263551  |
| sp Q9NX58 LYAR_FLYAR     | 6  | 5   | -0.344056 | 5  | 2  | 0.373126   |
| sp Q99615 DNJC7_DNAJC7   | 14 | 12  | -0.345083 | 7  | 6  | -0.339688  |
| sp Q12846 STX4_HSTX4     | 3  | 18  | -0.345719 | 0  | 9  | -0.118618  |
| sp O95573 ACSL3_ACSL3    | 19 | 106 | -0.346314 | 12 | 56 | -0.324851  |
| sp P38159 RBMX_IRBMX     | 19 | 11  | -0.34673  | 10 | 4  | -0.332732  |
| sp P49841-2 GSK3IGSK3B   | 2  | 5   | -0.347195 | 1  | 2  | -0.220423  |
| sp Q9UG63 ABCF2_ABCF2    | 18 | 34  | -0.347363 | 2  | 7  | -0.335     |
| sp Q15738 NSDHL_NSDHL    | 6  | 17  | -0.348168 | 0  | 6  | -0.636973  |
| sp P63027 VAMP2_VAMP2    | 2  | 5   | -0.348387 | 3  | 3  | -0.0583815 |
| sp P53675 CLH2_HCLTCL1   | 1  | 2   | -0.348433 | 0  | 1  | -0.858612  |
| sp P49006 MRP_H_MARCKSL1 | 6  | 17  | -0.34919  | 1  | 18 | 0          |
| sp P31689 DNJA1_DNAJA1   | 13 | 23  | -0.349794 | 8  | 13 | -0.289928  |
| sp P15529-2 MCP_CD46     | 1  | 15  | -0.350788 | 0  | 3  | -0.0413046 |
| sp P25445 TNR6_TFAS      | 0  | 15  | -0.350842 | 0  | 12 | -0.192512  |
| sp Q12765-2 SCRN_SCRN1   | 8  | 8   | -0.352036 | 5  | 4  | -0.109574  |
| sp Q9BPX3 CND3_INCAPG    | 23 | 17  | -0.352654 | 2  | 1  | -0.066138  |
| sp Q05209 PTN12_PTPN12   | 8  | 2   | -0.354847 | 1  | 1  | 0          |
| sp O43765 SGTA_FSGTA     | 4  | 4   | -0.354968 | 1  | 1  | 0.1848     |
| sp Q9H1E3 NUCKS_NUCKS1   | 7  | 4   | -0.355179 | 6  | 6  | -0.155053  |
| sp Q8IZ21-2 PHAR_PHACTR4 | 3  | 13  | -0.355485 | 2  | 2  | -1.00591   |
| sp Q9Y450 HBS1L_HBS1L    | 14 | 16  | -0.356017 | 6  | 6  | -0.579893  |
| sp Q9Y237-2 PIN4_PIN4    | 6  | 8   | -0.356209 | 4  | 4  | -0.180974  |
| sp P31153 METK2_MAT2A    | 6  | 4   | -0.35668  | 4  | 1  | 0.0156562  |
| sp Q8NBI5 S43A3_SLC43A3  | 0  | 11  | -0.356707 | 0  | 2  | -0.384609  |
| sp Q12893 TM115_TM115    | 3  | 10  | -0.358472 | 0  | 7  | -0.195406  |
| sp P21589 SNTD_TNTSE     | 0  | 34  | -0.359488 | 0  | 13 | -0.47861   |
| sp P50995 ANX11_ANXA11   | 6  | 7   | -0.361977 | 2  | 1  | 0.145223   |
| sp Q92616 GCN1L_GC1N1L1  | 91 | 120 | -0.364646 | 42 | 40 | -0.147721  |
| sp Q9Y676 RT18B_MRPS18B  | 5  | 8   | -0.365522 | 7  | 4  | 0          |
| sp Q14254 FLOT2_FLOT2    | 12 | 60  | -0.367018 | 3  | 45 | -0.447699  |
| sp Q9HOR3 TM222_TM115    | 0  | 4   | -0.368169 | 0  | 1  | -0.675538  |
| sp Q9H082 R833B_RAB33B   | 0  | 14  | -0.369752 | 0  | 3  | -0.282723  |
| sp Q5H9R7-5 PP6RPPP6R3   | 20 | 9   | -0.370841 | 5  | 3  | -0.686614  |
| sp P55011 S12A2_SLC12A2  | 6  | 69  | -0.370902 | 0  | 24 | -0.341822  |
| sp Q06830 PRDX1_PRDX1    | 56 | 143 | -0.371531 | 35 | 66 | -0.587699  |
| sp Q93096 TP4A1_PTP4A1   | 2  | 12  | -0.371645 | 1  | 3  | -0.248851  |
| sp Q9Y5Y0 FLVC1_FLVCR1   | 0  | 12  | -0.371927 | 0  | 4  | -0.380625  |
| sp O94874 UFL1_TUFL1     | 14 | 26  | -0.37201  | 3  | 7  | -0.575312  |
| sp O00151 PDLI1_IPDLIM1  | 9  | 16  | -0.372182 | 2  | 4  | 0.184001   |
| sp Q14978-2 NOLCNOLC1    | 13 | 5   | -0.373178 | 3  | 3  | -0.346465  |
| sp P07948 LYN_HULYN      | 0  | 11  | -0.373885 | 0  | 3  | -1.26976   |
| sp P09382 LEG1_HLGALS1   | 57 | 42  | -0.374484 | 32 | 26 | -0.464128  |
| sp P61353 RL27_HRPL27    | 7  | 14  | -0.376436 | 3  | 8  | -0.502789  |

|                          |    |     |           |    |    |            |
|--------------------------|----|-----|-----------|----|----|------------|
| sp Q14738 2A5D_FPPP2R5D  | 13 | 7   | -0.37915  | 1  | 1  | 0.0649778  |
| sp P20700 LMNB1_LMNB1    | 41 | 7   | -0.380027 | 21 | 1  | 0.091612   |
| sp P51648-2 AL3A:ALDH3A2 | 11 | 32  | -0.380635 | 8  | 14 | -0.194568  |
| sp Q535F7 COBL1_COBL1    | 2  | 13  | -0.38116  | 0  | 6  | -0.377237  |
| sp Q9BUB7 TMM7_TMEN70    | 6  | 7   | -0.381314 | 1  | 3  | -0.381033  |
| sp Q99584 S10AD_S100A13  | 6  | 12  | -0.381742 | 4  | 5  | -0.849292  |
| sp Q8IUD2 RB6I2_ERC1     | 20 | 15  | -0.382656 | 2  | 5  | -0.558512  |
| sp Q9BV40 VAMP8_VAMP8    | 2  | 4   | -0.382931 | 1  | 1  | -0.749785  |
| sp P05388 RLA0_HRPLP0    | 28 | 57  | -0.383279 | 25 | 43 | -0.260587  |
| sp Q07617 SPAG1_SPAG1    | 1  | 7   | -0.383745 | 0  | 2  | -0.610101  |
| sp Q12905 ILF2_HILF2     | 28 | 19  | -0.384921 | 9  | 4  | -0.781229  |
| sp P23921 RIR1_HIRRM1    | 36 | 48  | -0.385376 | 7  | 15 | -0.24379   |
| sp Q969V3 NCLN_INCLN     | 2  | 4   | -0.385994 | 3  | 1  | -0.552448  |
| sp P53396 ACLY_HACLY     | 96 | 137 | -0.38651  | 29 | 75 | -0.317771  |
| sp Q12904-2 AIMP1_AIMP1  | 3  | 10  | -0.387362 | 2  | 4  | 0.283349   |
| sp Q8WUR7 CO04C15orf40   | 4  | 8   | -0.387506 | 2  | 1  | -0.616585  |
| sp Q9NYL9 TMOD3_TM0D3    | 21 | 34  | -0.389438 | 18 | 24 | -0.37133   |
| sp P46776 RL27A_RPL27A   | 6  | 6   | -0.391707 | 2  | 4  | -0.582716  |
| sp O60503 ADCY9_ADCY9    | 0  | 13  | -0.393321 | 0  | 3  | -0.457062  |
| sp P42345 MTOR_MTOR      | 10 | 16  | -0.393588 | 1  | 4  | -0.613936  |
| sp Q8N5K1 CISD2_CISD2    | 4  | 8   | -0.394364 | 3  | 3  | -0.44934   |
| sp Q07020 RL18_HRPL18    | 8  | 16  | -0.394482 | 4  | 5  | -0.538801  |
| sp Q9BUP3-3 HTAI_HTATIP2 | 5  | 23  | -0.394687 | 1  | 3  | -0.646889  |
| sp P48067-2 SC6A:SLC6A9  | 0  | 6   | -0.395494 | 0  | 3  | -0.402408  |
| sp Q9H3N1 TMX1_TMX1      | 4  | 14  | -0.396271 | 5  | 5  | -0.444586  |
| sp O75477 ERLN1_ERLN1    | 6  | 16  | -0.39643  | 4  | 6  | -0.234759  |
| sp Q9H0V9-2 LMA:LMAN2L   | 3  | 8   | -0.398075 | 3  | 4  | -0.594492  |
| sp P50914 RL14_HRPL14    | 5  | 9   | -0.399249 | 3  | 2  | -0.514517  |
| sp P54709 AT1B3_ATP1B3   | 13 | 39  | -0.399376 | 10 | 33 | -0.41892   |
| sp Q9Y3L5 RAP2C_RAP2C    | 0  | 9   | -0.400839 | 0  | 4  | -0.446419  |
| sp P43007 SATT_HSLC1A4   | 2  | 19  | -0.402173 | 5  | 11 | -0.196465  |
| sp P04083 ANXA1_ANXA1    | 25 | 68  | -0.403114 | 20 | 29 | -0.277118  |
| sp O00767 ACOD_SCD       | 18 | 29  | -0.403252 | 3  | 15 | -0.193761  |
| sp Q8N6L1-2 KTAP_KRTCAP2 | 2  | 4   | -0.404999 | 1  | 2  | -0.530777  |
| sp Q12841 FSTL1_FSTL1    | 0  | 4   | -0.405513 | 0  | 1  | -0.354059  |
| sp P50897 PPT1_HPPT1     | 3  | 21  | -0.406807 | 4  | 14 | 0.636905   |
| sp Q13425 SNTB2_SNTB2    | 0  | 13  | -0.406857 | 0  | 7  | -0.32504   |
| sp Q96HE7 ERO1A_ERO1L    | 9  | 19  | -0.407102 | 2  | 9  | -0.523686  |
| sp Q16658 FSCN1_FSCN1    | 15 | 24  | -0.407348 | 11 | 21 | -0.477811  |
| sp Q9C0D9 EPT1_EPT1      | 0  | 5   | -0.408292 | 0  | 1  | -0.588089  |
| sp Q05639 EF1A2_EEF1A2   | 93 | 142 | -0.410308 | 49 | 86 | -0.43921   |
| sp Q5ZPR3 CD276_CD276    | 5  | 15  | -0.410912 | 0  | 11 | -0.482     |
| sp Q8IWU2 LMTK2_LMTK2    | 2  | 6   | -0.411133 | 0  | 2  | -0.0403281 |
| sp Q9GZM5 YIPF3_YIPF3    | 0  | 7   | -0.412059 | 0  | 3  | -0.430336  |
| sp Q9H6X2 ANTR1_ANTXR1   | 2  | 25  | -0.412243 | 0  | 12 | -0.638529  |

|                          |    |     |           |    |     |            |
|--------------------------|----|-----|-----------|----|-----|------------|
| sp Q9NRV9 HEBP1_HEBP1    | 10 | 9   | -0.413948 | 4  | 5   | -1.13602   |
| sp Q15021 CND1_INCAPD2   | 24 | 18  | -0.41411  | 3  | 7   | -0.694612  |
| sp Q15785 TOM34TOMM34    | 9  | 9   | -0.415021 | 1  | 3   | -0.458952  |
| sp Q9Y295 DRG1_IDRG1     | 7  | 14  | -0.418645 | 11 | 9   | -0.776027  |
| sp Q8N5M4 TTC9CTTC9C     | 2  | 4   | -0.4202   | 0  | 2   | -0.0791187 |
| sp P61221 ABCE1_ABCE1    | 18 | 27  | -0.420433 | 15 | 16  | -0.0167552 |
| sp Q9UM54 MYO6MYO6       | 6  | 27  | -0.420448 | 0  | 5   | -0.466741  |
| sp Q6NUK4 REEP3_REEP3    | 2  | 8   | -0.420552 | 0  | 6   | -0.593912  |
| sp P18621-3 RL17_RPL17   | 13 | 27  | -0.421236 | 6  | 8   | -0.367112  |
| sp Q13438 OS9_HIOS9      | 2  | 17  | -0.422896 | 2  | 6   | -0.653379  |
| sp Q8IYI6 EXOC8_EXOC8    | 0  | 2   | -0.423259 | 0  | 4   | -1.11281   |
| sp P40818 UBP8_USP8      | 10 | 21  | -0.423364 | 4  | 2   | -0.30673   |
| sp Q16850 CP51A_CYP51A1  | 3  | 17  | -0.424869 | 4  | 13  | -0.230371  |
| sp Q96CW5 GCP3_TUBGCP3   | 5  | 5   | -0.424944 | 1  | 1   | -0.532325  |
| sp P10316 1A69_HHLA-A    | 4  | 12  | -0.425817 | 6  | 13  | -0.345473  |
| sp P42224 STAT1_STAT1    | 31 | 29  | -0.426944 | 10 | 7   | -0.218783  |
| sp O14936 CSKP_FCASK     | 5  | 44  | -0.427321 | 0  | 15  | -0.532106  |
| sp O94887 FARP2_FARP2    | 0  | 6   | -0.427943 | 1  | 6   | -0.576575  |
| sp P13473 LAMP2_LAMP2    | 4  | 18  | -0.427945 | 0  | 9   | -0.200526  |
| sp Q7Z4R8 CF120_C6orf120 | 3  | 6   | -0.42825  | 4  | 3   | -0.193812  |
| sp Q00839 HNRPU_HNRNPU   | 56 | 50  | -0.428788 | 25 | 32  | -0.323938  |
| sp Q96TA1 NIBL1_FAM129B  | 34 | 71  | -0.430849 | 9  | 27  | -0.280903  |
| sp P62891 RL39_HRPL39    | 1  | 5   | -0.431316 | 0  | 2   | -0.465189  |
| sp Q9NTJ3 SMC4_ISMC4     | 56 | 53  | -0.431687 | 14 | 7   | -0.595754  |
| sp P55795 HNRH2_HNRNPH2  | 6  | 2   | -0.432757 | 2  | 1   | -0.126962  |
| sp P80723 BASP1_BASP1    | 52 | 199 | -0.435067 | 45 | 138 | -0.53923   |
| sp Q14008 CKAP5_CKAP5    | 65 | 69  | -0.435068 | 14 | 11  | -0.587914  |
| sp Q9HCN8 SDF2L_SDF2L1   | 4  | 9   | -0.435117 | 3  | 6   | -0.302756  |
| sp Q9BVK2 ALG8_ALG8      | 1  | 3   | -0.435589 | 0  | 1   | -0.982599  |
| sp Q9NVA2-2 SEP1 11-Sep  | 12 | 34  | -0.43696  | 7  | 32  | -0.608076  |
| sp P27635 RL10_HRPL10    | 9  | 28  | -0.436982 | 9  | 13  | -0.474597  |
| sp Q9NUL7 DDX28_DDX28    | 0  | 2   | -0.437051 | 0  | 1   | -1.06853   |
| sp Q06124 PTN11_PTPN11   | 2  | 16  | -0.437092 | 3  | 7   | -0.113177  |
| sp P62424 RL7A_HRPL7A    | 15 | 27  | -0.437712 | 5  | 3   | -0.503008  |
| sp P86791 CCZ1_HCCZ1     | 0  | 9   | -0.437745 | 0  | 4   | -0.339176  |
| sp Q12907 LMAN2_LMAN2    | 12 | 18  | -0.437849 | 6  | 7   | -0.301511  |
| sp Q7Z2W4 ZCCHVZC3HAV1   | 17 | 16  | -0.438602 | 4  | 14  | -0.322349  |
| sp Q6NYC8 PPR18_PPP1R18  | 5  | 16  | -0.43888  | 1  | 12  | -0.559224  |
| sp Q9BXI6 TB10A_TBC1D10A | 0  | 6   | -0.439125 | 0  | 4   | -0.84078   |
| sp P36578 RL4_HURPL4     | 28 | 72  | -0.44072  | 13 | 25  | -0.350695  |
| sp P62330 ARF6_HARF6     | 8  | 25  | -0.441642 | 3  | 9   | -0.326444  |
| sp Q02878 RL6_HURPL6     | 35 | 53  | -0.441687 | 14 | 13  | -0.439346  |
| sp Q96K49 TM87B_TM87B    | 0  | 2   | -0.44382  | 0  | 3   | 0.515906   |
| sp Q08380 LG3BP_LGALS3BP | 2  | 21  | -0.44444  | 0  | 6   | -0.195755  |
| sp P33527-9 MRP1ABCC1    | 10 | 157 | -0.445058 | 5  | 45  | -0.463646  |



|                         |    |     |           |    |     |             |
|-------------------------|----|-----|-----------|----|-----|-------------|
| sp Q9UJU6-3 DBNIDBNL    | 7  | 6   | -0.446177 | 0  | 1   | -0.0944243  |
| sp P10644 KAPO_HPRKAR1A | 9  | 18  | -0.446401 | 2  | 2   | 0.488271    |
| sp P25205 MCM3_MCM3     | 30 | 11  | -0.44664  | 8  | 7   | -0.790595   |
| sp O15357 SHIP2_INPPL1  | 20 | 12  | -0.447758 | 2  | 2   | 0.45592     |
| sp Q8N766 EMC1_EMC1     | 22 | 40  | -0.450403 | 5  | 29  | -0.364848   |
| sp P47914 RL29_HRPL29   | 9  | 21  | -0.450452 | 4  | 8   | -0.505355   |
| sp Q96QD8 S38A2_SLC38A2 | 5  | 41  | -0.451937 | 7  | 52  | -0.32252    |
| sp Q13885 TBB2A_TUBB2A  | 26 | 29  | -0.452939 | 24 | 32  | -0.251161   |
| sp P62993 GRB2_FGRB2    | 4  | 5   | -0.453138 | 2  | 3   | -0.213357   |
| sp P49257 LMAN1_LMAN1   | 17 | 52  | -0.45346  | 10 | 39  | -0.377465   |
| sp Q6NSJ5 LRC8E_LRRC8E  | 0  | 1   | -0.455355 | 0  | 1   | -0.424094   |
| sp O43707 ACTN4_ACTN4   | 97 | 218 | -0.456047 | 45 | 103 | -0.455705   |
| sp Q08357 S20A2_SLC20A2 | 0  | 6   | -0.456551 | 0  | 2   | -0.236374   |
| sp O60779 S19A2_SLC19A2 | 0  | 7   | -0.45671  | 0  | 3   | -0.119748   |
| sp O00505 IMA4_FKPNA3   | 12 | 10  | -0.456946 | 8  | 3   | -0.232548   |
| sp P12268 IMDH2_IMPDH2  | 27 | 60  | -0.460259 | 22 | 15  | -0.340466   |
| sp P63208 SKP1_HSKP1    | 12 | 10  | -0.460352 | 10 | 6   | -0.113474   |
| sp P53985 MOT1_SLC16A1  | 5  | 29  | -0.460539 | 4  | 5   | -0.308283   |
| sp Q7KZI7 MARK2_MARK2   | 0  | 8   | -0.461118 | 0  | 1   | -0.727704   |
| sp P61313 RL15_HRPL15   | 12 | 14  | -0.46188  | 4  | 4   | -0.00506668 |
| sp P14866 HNRPL_HNRNPL  | 26 | 12  | -0.461907 | 13 | 2   | -0.236543   |
| sp P68371 TBB4B_TUBB4B  | 13 | 13  | -0.462771 | 9  | 5   | -0.407131   |
| sp Q12802-2 AKP1_AKAP13 | 27 | 24  | -0.462986 | 10 | 7   | -0.328825   |
| sp Q16181 SEPT7_7-Sep   | 25 | 57  | -0.46303  | 14 | 39  | -0.41092    |
| sp P30050 RL12_HRPL12   | 6  | 13  | -0.464275 | 4  | 7   | -0.44901    |
| sp P42330 AK1C3_AKR1C3  | 23 | 37  | -0.465351 | 13 | 9   | -0.669688   |
| sp P12956 XRCC6_XRCC6   | 58 | 69  | -0.465682 | 53 | 30  | -0.0774481  |
| sp Q92882 OSTF1_OSTF1   | 5  | 10  | -0.46569  | 4  | 3   | -0.431776   |
| sp P51571 SSRD_HSSR4    | 7  | 13  | -0.465722 | 8  | 7   | -0.833499   |
| sp Q5JPE7 NOMO2NOMO2    | 29 | 55  | -0.467176 | 14 | 38  | -0.320174   |
| sp O94804 STK10_STK10   | 2  | 6   | -0.468583 | 0  | 1   | 1.94953     |
| sp P62136 PP1A_HPPP1CA  | 3  | 8   | -0.469116 | 0  | 1   | -0.612029   |
| sp Q9Y3A5 SBDS_FSBDS    | 11 | 18  | -0.469242 | 5  | 3   | -0.762005   |
| sp Q93052 LPP_HLPP      | 19 | 32  | -0.471158 | 11 | 22  | -0.489938   |
| sp Q13526 PIN1_HPIN1    | 6  | 3   | -0.471378 | 2  | 2   | -0.857501   |
| sp P34741 SDC2_HSDC2    | 5  | 12  | -0.471596 | 0  | 5   | -0.285732   |
| sp Q13636 RAB31_RAB31   | 5  | 16  | -0.471643 | 1  | 8   | -0.566212   |
| sp Q92688 AN32B_ANP32B  | 13 | 18  | -0.472151 | 4  | 2   | -0.512452   |
| sp Q04917 1433F_YWHAH   | 6  | 14  | -0.473539 | 7  | 4   | 0.0121662   |
| sp P61225 RAP2B_RAP2B   | 3  | 20  | -0.473667 | 1  | 4   | -0.520558   |
| sp Q4KMQ2-2 ANCANO6     | 3  | 34  | -0.473855 | 0  | 14  | -0.409482   |
| sp P32969 RL9_HURPL9    | 13 | 22  | -0.474626 | 7  | 9   | -0.471144   |
| sp Q14103 HNRPD_HNRNPD  | 13 | 8   | -0.474651 | 9  | 8   | -0.654361   |
| sp Q14126 DSG2_FDSG2    | 2  | 46  | -0.475873 | 2  | 13  | -0.39018    |
| sp Q8IY95 TM192_TM192   | 1  | 6   | -0.476483 | 0  | 2   | 0.299605    |

|                           |    |     |           |    |    |           |
|---------------------------|----|-----|-----------|----|----|-----------|
| sp Q92841 DDX17_DDX17     | 24 | 17  | -0.476588 | 10 | 3  | -0.301539 |
| sp P61981 1433G_YWHAG     | 21 | 37  | -0.47673  | 7  | 11 | -0.251031 |
| sp Q9NYL4 FKB11_FKBP11    | 1  | 4   | -0.477261 | 0  | 2  | -0.267684 |
| sp P29558 RBMS1_RBMS1     | 2  | 1   | -0.477355 | 1  | 1  | -0.419752 |
| sp Q92878-2 RAD5RAD50     | 27 | 29  | -0.477637 | 3  | 2  | -0.216361 |
| sp Q9UPQ0 LIMC1_LIMCH1    | 32 | 53  | -0.477775 | 9  | 20 | -0.486843 |
| sp Q9UKS6 PACN3_PACSIN3   | 1  | 15  | -0.477854 | 0  | 2  | -0.657118 |
| sp Q8NBJ9-2 SIDT2SIDT2    | 0  | 4   | -0.478497 | 0  | 2  | 0.530788  |
| sp Q8WV92 MITD1MITD1      | 0  | 3   | -0.479101 | 0  | 2  | -0.438875 |
| sp P35606 COPB2_COPB2     | 38 | 16  | -0.479213 | 10 | 4  | -0.615072 |
| sp P30040 ERP29_ERP29     | 16 | 46  | -0.479946 | 10 | 23 | -0.53798  |
| sp P53992 SC24C_SEC24C    | 13 | 13  | -0.481558 | 2  | 4  | -0.443187 |
| sp Q9UIW2 PLXA1_PLXNA1    | 0  | 10  | -0.482967 | 0  | 1  | -0.470326 |
| sp Q9UGP8 SEC63_SEC63     | 20 | 72  | -0.485107 | 5  | 25 | -0.324225 |
| sp Q08211 DHX9_DHX9       | 31 | 20  | -0.485662 | 15 | 9  | -0.45264  |
| sp O00410-3 IPO5_IPO5     | 51 | 61  | -0.487642 | 15 | 21 | -0.577573 |
| sp Q9NZ01 TECR_FTECR      | 2  | 21  | -0.489076 | 3  | 5  | -0.605145 |
| sp P32322 P5CR1_PYCR1     | 13 | 17  | -0.48942  | 4  | 2  | -0.784737 |
| sp Q96R06 SPAG5_SPAG5     | 2  | 2   | -0.48969  | 1  | 2  | -0.763417 |
| sp O14763 TR10B_TNFRSF10B | 0  | 10  | -0.493521 | 0  | 1  | -0.669507 |
| sp P61960 UFM1_UFM1       | 8  | 10  | -0.493645 | 3  | 4  | -0.214253 |
| sp O95297 MPZL1_MPZL1     | 2  | 18  | -0.494175 | 1  | 10 | -0.305443 |
| sp P43307 SSRA_HSSR1      | 10 | 28  | -0.494224 | 7  | 17 | -0.412798 |
| sp A0FGR8-6 ESYT:ESYT2    | 13 | 44  | -0.49497  | 2  | 12 | -0.423307 |
| sp O15258 RER1_FRER1      | 2  | 8   | -0.495143 | 0  | 4  | -0.448105 |
| sp Q9Y2D5-4 AKAFAP2       | 28 | 75  | -0.49653  | 16 | 35 | -0.382274 |
| sp O75955 FLOT1_FLOT1     | 5  | 62  | -0.498483 | 7  | 36 | -0.523595 |
| sp Q9UGI8 TES_HLTES       | 9  | 18  | -0.499337 | 4  | 3  | -0.673388 |
| sp Q10589 BST2_HBST2      | 4  | 20  | -0.503613 | 4  | 10 | -0.528237 |
| sp Q8NF37 PCAT1_LPCAT1    | 4  | 9   | -0.503833 | 2  | 1  | -0.183151 |
| sp Q96HJ9-2 CG05_C7orf55  | 13 | 13  | -0.503931 | 14 | 4  | -1.06906  |
| sp O95347 SMC2_ISMC2      | 38 | 43  | -0.50479  | 13 | 11 | -0.709409 |
| sp Q15149-4 PLEC_PLEC     | 2  | 4   | -0.506117 | 1  | 1  | -1.28662  |
| sp P54920 SNAA_FNAPA      | 17 | 15  | -0.506583 | 3  | 8  | -0.90432  |
| sp P68104 EF1A1_EEF1A1    | 84 | 144 | -0.508317 | 68 | 88 | -0.437991 |
| sp Q53GQ0 DHB12HSD17B12   | 5  | 16  | -0.508788 | 1  | 7  | -0.689625 |
| sp P46060 RAGP1_RANGAP1   | 20 | 17  | -0.509616 | 6  | 3  | -0.218941 |
| sp Q9HBR0 S38AA_SLC38A10  | 0  | 2   | -0.509663 | 0  | 1  | -0.394449 |
| sp O00203 AP3B1_AP3B1     | 24 | 17  | -0.50979  | 3  | 2  | -0.422375 |
| sp Q6P4E1-4 CASC_CASC4    | 1  | 17  | -0.511273 | 0  | 4  | -0.510008 |
| sp Q92581-2 SL9A_SLC9A6   | 0  | 3   | -0.512239 | 0  | 1  | -0.467244 |
| sp Q9P0V9-2 SEP1i 10-Sep  | 11 | 34  | -0.512643 | 1  | 17 | -0.330624 |
| sp P62917 RL8_HURPL8      | 12 | 29  | -0.513161 | 6  | 13 | -0.483327 |
| sp Q9Y624 JAM1_IF11R      | 0  | 9   | -0.513689 | 0  | 1  | -1.80044  |
| sp P50607-2 TUB_ITUB      | 1  | 9   | -0.514295 | 0  | 5  | -0.833074 |

|                         |     |     |           |    |    |           |
|-------------------------|-----|-----|-----------|----|----|-----------|
| sp P46109 CRKL_HCRKL    | 4   | 5   | -0.515019 | 2  | 2  | -0.557513 |
| sp Q3SXY8 AR13B_ARL13B  | 0   | 12  | -0.515528 | 0  | 1  | -0.610605 |
| sp Q9H2H9 S38A1_SLC38A1 | 1   | 22  | -0.517629 | 0  | 12 | -0.596827 |
| sp P58107 EPIPL_H_EPPK1 | 56  | 41  | -0.517822 | 35 | 14 | -0.533405 |
| sp Q92796-2 DLG3_DLG3   | 0   | 13  | -0.518383 | 0  | 5  | -0.604449 |
| sp O43657 TSN6_H_TSPAN6 | 1   | 5   | -0.518476 | 0  | 2  | -0.286354 |
| sp Q96HC4 PDLI5_PDLIM5  | 22  | 26  | -0.51861  | 12 | 9  | -0.449045 |
| sp P09429 HMGB1_HMGB1   | 21  | 16  | -0.518677 | 18 | 10 | -0.817686 |
| sp Q3SY69 AL1L2_ALDH1L2 | 7   | 6   | -0.519304 | 1  | 2  | -1.29011  |
| sp Q8IXS6-2 PALM_PALM2  | 6   | 30  | -0.519401 | 3  | 11 | -0.728452 |
| sp Q8N5M9 JAGN1_JAGN1   | 2   | 4   | -0.519811 | 3  | 3  | -0.395221 |
| sp Q14432 PDE3A_PDE3A   | 13  | 15  | -0.5201   | 3  | 11 | -0.468293 |
| sp O00499 BIN1_HBIN1    | 7   | 16  | -0.520132 | 7  | 5  | -0.71385  |
| sp Q01844-5 EWS_EWSR1   | 13  | 15  | -0.520405 | 12 | 9  | -0.526838 |
| sp Q6P1A2 MBOA_LPCAT3   | 2   | 5   | -0.521189 | 0  | 1  | -0.784364 |
| sp P42356 PI4KA_H_PI4KA | 8   | 43  | -0.521293 | 0  | 5  | -0.246851 |
| sp Q9Y5M8 SRPRB_SRPB    | 5   | 18  | -0.521956 | 2  | 8  | -0.484275 |
| sp O00139-4 KIF2A_KIF2A | 7   | 3   | -0.522138 | 0  | 1  | -0.579584 |
| sp Q9BTX1 NDC1_NDC1     | 3   | 5   | -0.522308 | 3  | 3  | -0.37319  |
| sp Q9H4A6 GOLP3_GOLPH3  | 3   | 5   | -0.522485 | 3  | 2  | -0.569386 |
| sp Q15691 MARE1_MAPRE1  | 12  | 18  | -0.523055 | 9  | 6  | -0.537992 |
| sp Q9NPA0 EMC7_EMCC7    | 7   | 17  | -0.523158 | 2  | 2  | -0.611511 |
| sp Q99729-2 ROA_HNRNPAB | 13  | 6   | -0.52546  | 7  | 7  | 0.0179133 |
| sp P08240 SRPR_HSRPR    | 8   | 31  | -0.528925 | 4  | 7  | -0.38784  |
| sp P18433 PTPRA_PTPRA   | 0   | 12  | -0.529129 | 0  | 7  | -0.888459 |
| sp Q14331 FRG1_H_FRG1   | 4   | 4   | -0.52997  | 3  | 1  | 2.44537   |
| sp P37108 SRP14_SRP14   | 9   | 13  | -0.530057 | 3  | 3  | -1.00722  |
| sp Q9NVA1 UQCC1_UQCC1   | 1   | 3   | -0.530171 | 0  | 1  | -1.13578  |
| sp P40763 STAT3_STAT3   | 16  | 12  | -0.530694 | 4  | 6  | -0.498645 |
| sp P12814-3 ACTN_ACTN1  | 63  | 138 | -0.530981 | 40 | 95 | -0.441027 |
| sp Q15293 RCN1_H_RCN1   | 22  | 72  | -0.531439 | 14 | 53 | -0.725716 |
| sp Q15149 PLEC_H_PLEC   | 197 | 260 | -0.531455 | 92 | 72 | -0.692066 |
| sp P18206 VINC_H_VCL    | 103 | 147 | -0.532857 | 52 | 61 | -0.445785 |
| sp P28482 MKO1_H_MAPK1  | 8   | 7   | -0.533045 | 5  | 5  | -1.1785   |
| sp P68036-3 UB2L_UBE2L3 | 12  | 8   | -0.533229 | 7  | 1  | 0.159447  |
| sp P54707-2 AT12_ATP12A | 4   | 17  | -0.534691 | 1  | 5  | -0.445957 |
| sp Q8N556-2 AFAPAFAP1   | 6   | 3   | -0.537253 | 1  | 2  | -0.290268 |
| sp O60245-3 PCDH_PCDH7  | 0   | 11  | -0.537388 | 0  | 6  | -1.34549  |
| sp P57729 RAB38_RAB38   | 1   | 5   | -0.537774 | 0  | 2  | -0.259552 |
| sp P07947 YES_H_HYES1   | 2   | 18  | -0.537821 | 0  | 5  | -0.526109 |
| sp Q07157 ZO1_H_HITJP1  | 44  | 84  | -0.538044 | 22 | 22 | -0.385891 |
| sp Q32MZ4 LRRF1_LRRFIP1 | 33  | 43  | -0.538084 | 16 | 9  | -0.577435 |
| sp O95721 SNP29_SNP29   | 5   | 16  | -0.538648 | 3  | 4  | -0.708801 |
| sp P37235 HPCAL1_HPCAL1 | 10  | 12  | -0.540027 | 5  | 3  | -0.322071 |
| sp Q8WUD1 RAB21RAB2B    | 1   | 8   | -0.54137  | 0  | 2  | 0.159619  |

|                          |    |     |           |    |     |             |
|--------------------------|----|-----|-----------|----|-----|-------------|
| sp P28838 AMPL_FLAP3     | 13 | 31  | -0.542339 | 11 | 12  | -0.5772     |
| sp P11717 MPRI_HIGF2R    | 27 | 67  | -0.542648 | 12 | 24  | -0.621364   |
| sp P07951 TPM2_ITPM2     | 20 | 34  | -0.543012 | 9  | 11  | -0.820007   |
| sp Q13045 FLII_HLFLII    | 29 | 22  | -0.543043 | 9  | 13  | -0.410502   |
| sp Q9BZQ8 NIBAN_FAM129A  | 21 | 37  | -0.543336 | 2  | 17  | -0.559668   |
| sp Q13724 MOGS_MOGS      | 7  | 12  | -0.543709 | 1  | 3   | -0.783538   |
| sp Q9BXB5 OSB10_OSBPL10  | 2  | 9   | -0.544179 | 0  | 4   | -0.347553   |
| sp P26885 FKBP2_FKBP2    | 10 | 14  | -0.544512 | 5  | 6   | -0.318182   |
| sp Q01650 LAT1_HSLC7A5   | 14 | 53  | -0.544628 | 8  | 26  | -0.669921   |
| sp Q15029 U5S1_HFTUD2    | 36 | 27  | -0.544947 | 12 | 4   | -0.618458   |
| sp P02461 CO3A1_COL3A1   | 1  | 18  | -0.545404 | 0  | 6   | -0.236902   |
| sp Q29RF7 PDS5A_PDS5A    | 33 | 10  | -0.545428 | 2  | 1   | -0.241475   |
| sp Q92614 MY18A_MYO18A   | 12 | 43  | -0.547229 | 5  | 16  | -0.705718   |
| sp Q14160-3 SCRIBSCRIB   | 9  | 32  | -0.548872 | 2  | 19  | -0.612097   |
| sp P35613 BASI_HIBSG     | 9  | 51  | -0.549206 | 6  | 32  | -0.426677   |
| sp Q8NHG8 ZNR2ZNR2       | 0  | 1   | -0.549589 | 0  | 1   | -0.798435   |
| sp Q02487 DSC2_FDSC2     | 0  | 5   | -0.550908 | 0  | 3   | -0.497632   |
| sp O14979 HNRDL_HNRNPD   | 13 | 6   | -0.552109 | 11 | 5   | -0.0844583  |
| sp Q14697-2 GAN_GANAB    | 45 | 141 | -0.552926 | 15 | 56  | -0.716348   |
| sp P17301 ITA2_HIITGA2   | 8  | 76  | -0.552958 | 0  | 35  | -0.35816    |
| sp O00194 RB27B_RAB27B   | 0  | 10  | -0.553516 | 0  | 3   | -0.519433   |
| sp O43402 EMC8_EMCS      | 0  | 2   | -0.554457 | 0  | 7   | -0.211587   |
| sp Q92974 ARHG2_ARHGEF2  | 5  | 7   | -0.555129 | 2  | 1   | -1.48338    |
| sp Q96HY6 DDRKGDDRKG1    | 1  | 3   | -0.555687 | 0  | 1   | -0.371289   |
| sp Q14114 LRP8_HLRP8     | 0  | 8   | -0.556281 | 0  | 2   | -1.03476    |
| sp Q02952 AKA12_AKAP12   | 51 | 80  | -0.557062 | 24 | 46  | -0.605071   |
| sp P30533 AMRP_LRPAP1    | 9  | 24  | -0.55715  | 5  | 7   | -0.436163   |
| sp Q15334 L2GL1_LLGL1    | 2  | 8   | -0.557464 | 0  | 4   | -0.587618   |
| sp Q9UL54 TAOK2_TAOK2    | 3  | 9   | -0.557882 | 0  | 2   | -1.09327    |
| sp P15586 GNS_HIGNS      | 6  | 47  | -0.557921 | 3  | 11  | -0.27031    |
| sp P55209 NP1L1_NAP1L1   | 15 | 23  | -0.559008 | 14 | 7   | -0.437732   |
| sp Q6NUM9 RETSTRETSAT    | 1  | 5   | -0.55937  | 0  | 1   | -0.0915086  |
| sp Q06136 KDSR_FKDSR     | 0  | 2   | -0.561465 | 0  | 1   | -0.42446    |
| sp Q8TC12 RDH11_RDH11    | 0  | 10  | -0.562045 | 0  | 2   | -0.929863   |
| sp P41567 EIF1_HLEIF1    | 2  | 4   | -0.562249 | 2  | 2   | -0.646711   |
| sp P16070 CD44_FCD44     | 33 | 104 | -0.562465 | 4  | 40  | -0.50833    |
| sp Q9UBV2 SE1L1_SEL1L    | 2  | 10  | -0.563749 | 0  | 6   | -0.0729147  |
| sp Q92692 PVRL2_PVRL2    | 0  | 12  | -0.564066 | 0  | 4   | -0.00190707 |
| sp P60953 CDC42_CDC42    | 6  | 21  | -0.564154 | 4  | 8   | -0.652002   |
| sp Q969H8 CS010_C19orf10 | 15 | 22  | -0.564369 | 12 | 18  | -0.682733   |
| sp Q8NHP8 PLBL2_PLBD2    | 2  | 10  | -0.566072 | 0  | 9   | 0.285582    |
| sp Q9NS87 KIF15_IKIF15   | 13 | 9   | -0.566634 | 1  | 1   | -0.274052   |
| sp P05023 AT1A1_ATP1A1   | 29 | 158 | -0.567435 | 9  | 104 | -0.564708   |
| sp P62888 RL30_HRPL30    | 8  | 9   | -0.56762  | 6  | 3   | -0.626554   |
| sp P09543 CN37_FCNP      | 15 | 57  | -0.56806  | 5  | 38  | -0.649158   |

|                          |     |     |           |     |     |            |
|--------------------------|-----|-----|-----------|-----|-----|------------|
| sp P47756-2 CAPZICAPZB   | 16  | 31  | -0.568186 | 7   | 8   | -0.572876  |
| sp Q55W79 CE170_CEP170   | 22  | 3   | -0.569106 | 4   | 1   | -0.0209743 |
| sp Q15833 STXB2_STXBP2   | 1   | 14  | -0.569239 | 0   | 5   | -0.925866  |
| sp O75369-8 FLNB_FLNB    | 237 | 376 | -0.569518 | 125 | 201 | -0.602168  |
| sp P09601 HMOX1_HMOX1    | 1   | 3   | -0.569813 | 0   | 2   | -0.259451  |
| sp O43396 TXNL1_TXNL1    | 10  | 5   | -0.570684 | 9   | 2   | -1.06782   |
| sp Q70E73 RAPH1_RAPH1    | 10  | 35  | -0.571669 | 3   | 7   | -0.470843  |
| sp P08133 ANXA6_ANXA6    | 37  | 58  | -0.571791 | 11  | 24  | -0.770098  |
| sp Q01459 DIAC_HCTBS     | 0   | 1   | -0.572968 | 0   | 2   | 0.562535   |
| sp Q4KMP7 TB10B_TBC1D10B | 2   | 35  | -0.574687 | 0   | 9   | -0.676238  |
| sp Q9NYP7-2 ELOVELOVL5   | 4   | 9   | -0.574961 | 1   | 4   | -0.739848  |
| sp Q9H488 OFUT1_POFUT1   | 3   | 13  | -0.575336 | 0   | 6   | -0.916203  |
| sp P53618 COPB_F_COPB1   | 33  | 24  | -0.575351 | 13  | 3   | -0.516117  |
| sp Q13555-6 KCC2_CAMK2G  | 3   | 5   | -0.575964 | 1   | 5   | -0.111943  |
| tr F8WA26 F8WA2_PALLD    | 1   | 4   | -0.576456 | 1   | 2   | -0.663964  |
| sp Q9NQC3-2 RTN_RTNA     | 8   | 24  | -0.576871 | 7   | 12  | -0.444173  |
| sp Q10567 AP1B1_AP1B1    | 10  | 6   | -0.577834 | 4   | 2   | -0.695767  |
| sp Q6ZRP7 QSOX2_QSOX2    | 6   | 27  | -0.577856 | 1   | 3   | -0.340416  |
| sp Q7L7X3 TAOK1_TAOK1    | 1   | 16  | -0.581206 | 1   | 7   | -0.598576  |
| sp Q9Y2A7-2 NCKPNCAP1    | 16  | 34  | -0.581885 | 1   | 11  | -0.480852  |
| sp P54852 EMP3_EMP3      | 3   | 12  | -0.583217 | 0   | 4   | -0.60301   |
| sp Q99627 CSN8_FCOPS8    | 2   | 2   | -0.583515 | 2   | 1   | -0.246567  |
| sp P14618-2 KPYMPKM      | 123 | 181 | -0.585063 | 87  | 131 | -0.507962  |
| sp P23919 KTHY_HDTYMK    | 9   | 14  | -0.587456 | 5   | 4   | -0.583484  |
| sp O95816 BAG2_IBAG2     | 8   | 12  | -0.587992 | 2   | 5   | -0.463338  |
| sp Q9NXW2-2 DJB_DNAJB12  | 1   | 9   | -0.588214 | 0   | 4   | -0.393322  |
| sp P07602 SAP_HLPSAP     | 7   | 47  | -0.589939 | 3   | 16  | 0.753921   |
| sp Q92544 TM9S4_TM9SF4   | 2   | 16  | -0.590147 | 1   | 10  | -0.390976  |
| sp Q96FQ6 S10AG_S100A16  | 6   | 6   | -0.590315 | 2   | 2   | -0.850327  |
| sp Q9UN86 G3BP2_G3BP2    | 10  | 16  | -0.590329 | 4   | 1   | -0.69625   |
| sp Q9UPY8 MARE3MAPRE3    | 5   | 4   | -0.590888 | 5   | 2   | -0.65917   |
| sp P01111 RASN_FNRAS     | 8   | 30  | -0.591116 | 3   | 14  | -0.684374  |
| sp Q01518 CAP1_CAP1      | 35  | 71  | -0.591234 | 12  | 18  | -0.590115  |
| sp O00400 ACATN_SLC33A1  | 2   | 6   | -0.592556 | 1   | 4   | -0.157694  |
| sp Q15758 AAAT_FSLC1A5   | 12  | 26  | -0.592975 | 2   | 17  | -0.543424  |
| sp Q9C0B5 ZDHC5_ZDHC5    | 0   | 8   | -0.594492 | 0   | 10  | -0.554991  |
| sp Q9P0L0 VAPA_FVAPA     | 17  | 47  | -0.594549 | 9   | 19  | -0.626239  |
| tr G3V1K3 G3V1K3PON2     | 10  | 36  | -0.595357 | 10  | 28  | -0.556519  |
| sp P52594-4 AGFG_AGFG1   | 8   | 12  | -0.595648 | 6   | 3   | -0.544575  |
| sp Q969N2 PIGT_FPIGT     | 0   | 6   | -0.595706 | 0   | 3   | -0.789494  |
| sp Q5JSL3 DOC11_DOCK11   | 5   | 15  | -0.596619 | 0   | 3   | -0.302992  |
| sp O95372 LYPA2_LYPLA2   | 4   | 2   | -0.597248 | 0   | 1   | -0.600564  |
| sp Q14141 SEPT6_ 6-Sep   | 3   | 17  | -0.598285 | 4   | 7   | -0.500374  |
| sp Q70UQ0 IKIP_HIKBIP    | 1   | 9   | -0.599714 | 0   | 1   | -0.431355  |
| sp Q96CN7 ISOC1_ISOC1    | 4   | 1   | -0.601741 | 3   | 2   | -0.503935  |

|                            |     |     |           |    |     |             |
|----------------------------|-----|-----|-----------|----|-----|-------------|
| sp Q16890 TPD53_TPD52L1    | 10  | 12  | -0.602901 | 2  | 1   | -0.745462   |
| sp Q9Y6M5 ZNT1_SLC30A1     | 5   | 37  | -0.603349 | 4  | 24  | -0.712749   |
| sp O75695 XRP2_FRP2        | 2   | 20  | -0.60428  | 0  | 10  | -0.788859   |
| sp Q53GA4 PHLA2_PHLDA2     | 2   | 7   | -0.606475 | 0  | 5   | -0.835447   |
| sp O15031 PLXB2_PLXNB2     | 6   | 97  | -0.607224 | 0  | 37  | -0.494378   |
| sp Q709C8 VP13C_VPS13C     | 21  | 12  | -0.608393 | 4  | 2   | -0.279548   |
| sp Q96BJ3 AIDA_HAIDA       | 1   | 9   | -0.608993 | 0  | 5   | -0.771877   |
| sp Q9HAU5 RENT2_UPF2       | 8   | 2   | -0.609515 | 0  | 2   | -1.31092    |
| sp Q9UHX3 EMR2_EMR2        | 0   | 1   | -0.609517 | 0  | 1   | -0.743732   |
| sp Q9BPX5 ARP5L_ARPC5L     | 5   | 15  | -0.611093 | 4  | 4   | -0.626565   |
| sp Q9BQG0-2 MBEMYBBP1A     | 39  | 5   | -0.611787 | 4  | 1   | 0.169071    |
| sp Q5T5C0 STXB5_STXBP5     | 2   | 5   | -0.613576 | 0  | 1   | -0.468691   |
| sp Q13263 TIF1B_ITRIM28    | 43  | 5   | -0.613592 | 20 | 2   | 0.0852574   |
| sp O14939 PLD2_FPLD2       | 0   | 12  | -0.613862 | 0  | 2   | -0.539398   |
| sp O15173-2 PGRCPGRMC2     | 11  | 21  | -0.614724 | 7  | 13  | -0.149956   |
| sp P10301 RRAS_HRRAS       | 4   | 28  | -0.616157 | 1  | 18  | -0.678287   |
| sp P53621-2 COPA_COPA      | 35  | 25  | -0.616314 | 7  | 3   | -0.677561   |
| sp P61619 S61A1_SEC61A1    | 1   | 11  | -0.617514 | 0  | 4   | -0.769194   |
| sp Q9H0U3 MAGT:MAGT1       | 4   | 9   | -0.617662 | 2  | 6   | -0.884332   |
| sp Q9H792 PEAK1_PEAK1      | 10  | 7   | -0.617944 | 4  | 2   | -0.590972   |
| sp P04843 RPN1_FRPN1       | 42  | 123 | -0.618296 | 15 | 48  | -0.713295   |
| sp O60645 EXOC3_EXOC3      | 0   | 20  | -0.618345 | 0  | 2   | -1.30735    |
| sp Q9NY12 GAR1_GAR1        | 5   | 5   | -0.61854  | 4  | 3   | -0.358365   |
| sp P53004 BIEA_HIBLVRA     | 3   | 6   | -0.623166 | 3  | 3   | 0.234471    |
| sp P30519 HMOX2_HMOX2      | 3   | 14  | -0.623679 | 0  | 3   | -0.839938   |
| sp Q01813 K6PP_FPKP        | 24  | 24  | -0.623907 | 9  | 12  | -0.419412   |
| sp Q70JA7 CHSS3_CHSY3      | 0   | 5   | -0.624024 | 0  | 2   | -0.862232   |
| sp Q96AY3 FKB10_FKBP10     | 10  | 45  | -0.624134 | 4  | 25  | -0.46944    |
| sp Q9Y3I0 RTCB_HRTCB       | 10  | 15  | -0.625186 | 8  | 4   | -0.0540897  |
| sp Q7Z460 CLAP1_CLASP1     | 16  | 18  | -0.627222 | 2  | 3   | -1.28953    |
| sp Q96N66 MBOA:MBOAT7      | 3   | 10  | -0.628326 | 0  | 1   | -0.442867   |
| sp Q8WU90 ZC3HFZC3H15      | 10  | 10  | -0.629969 | 1  | 3   | -0.282097   |
| sp Q9UDY2-7 ZO2_TJP2       | 16  | 19  | -0.630488 | 0  | 3   | -0.00526578 |
| sp Q96PY5-3 FMNIFMNL2      | 2   | 63  | -0.63089  | 2  | 25  | -0.811338   |
| sp P52907 CAZA1_CAPZA1     | 15  | 29  | -0.633571 | 20 | 17  | -0.569213   |
| sp Q96KA5 CLP1L_CLPTM1L    | 5   | 19  | -0.63412  | 1  | 8   | -0.607564   |
| tr E7EVA0 E7EVA0_MAP4      | 178 | 168 | -0.634586 | 76 | 53  | -0.627529   |
| sp P08195 4F2_HUSLC3A2     | 75  | 440 | -0.634793 | 51 | 298 | -0.597901   |
| sp Q8TAE8 G45IP_GADD45GIP1 | 1   | 5   | -0.635385 | 1  | 1   | 0           |
| sp P04040 CATA_TCAT        | 6   | 24  | -0.636018 | 2  | 6   | -0.824698   |
| sp Q9Y224 CN166_C14orf166  | 21  | 17  | -0.636735 | 9  | 8   | -0.610285   |
| sp O15020 SPTN2_SPTBN2     | 16  | 36  | -0.63727  | 8  | 10  | -1.07892    |
| sp Q9UBS4 DJB11_DNAJB11    | 6   | 17  | -0.639275 | 6  | 10  | -0.832985   |
| sp P33176 KINH_HKIF5B      | 50  | 58  | -0.643955 | 20 | 32  | -0.694943   |
| tr J3QR46 J3QR46_KIAA0040  | 0   | 6   | -0.646189 | 0  | 2   | -0.547494   |

|                           |    |    |           |    |    |           |
|---------------------------|----|----|-----------|----|----|-----------|
| sp Q9HD20 AT131_ATP13A1   | 4  | 11 | -0.648019 | 0  | 3  | 0.185665  |
| sp P62166 NCS1_HNCS1      | 3  | 8  | -0.648596 | 1  | 3  | -0.802543 |
| sp P21359 NF1_HUNF1       | 7  | 5  | -0.649178 | 0  | 2  | -1.23506  |
| sp Q15904 VAS1_HATP6AP1   | 1  | 7  | -0.649642 | 2  | 2  | 0         |
| sp O60568 PLOD3_PLOD3     | 4  | 19 | -0.65075  | 2  | 6  | -0.630656 |
| sp Q93050-3 VPP1_ATP6V0A1 | 4  | 20 | -0.652096 | 0  | 5  | -0.996297 |
| sp Q8IZP0 ABI1_HIABI1     | 2  | 8  | -0.652118 | 1  | 5  | -0.255623 |
| sp Q15392 DHC24_DHCR24    | 4  | 14 | -0.654504 | 1  | 3  | -0.6476   |
| sp P39656 OST48_DDOST     | 11 | 21 | -0.654527 | 2  | 10 | -0.812282 |
| sp P17812 PYRG1_CTPS1     | 13 | 29 | -0.655221 | 9  | 9  | -0.804107 |
| sp Q9Y673 ALG5_FALG5      | 4  | 11 | -0.655762 | 0  | 3  | -0.945268 |
| sp P45877 PPIC_HIPPIC     | 10 | 16 | -0.656084 | 4  | 7  | -0.930718 |
| sp Q96DZ1 ERLEC_ERLEC1    | 0  | 3  | -0.6568   | 0  | 1  | -0.439696 |
| sp Q9H5V8 CDCP1_CDCP1     | 1  | 32 | -0.657122 | 1  | 12 | -0.754516 |
| sp P84090 ERH_HLERH       | 5  | 2  | -0.657333 | 0  | 1  | -0.657471 |
| sp O43493 TGON2_TGOLN2    | 6  | 14 | -0.659339 | 0  | 1  | -0.243162 |
| sp Q00653 NFKB2_NFKB2     | 11 | 7  | -0.659353 | 5  | 4  | -0.49117  |
| sp P23284 PPIB_HIPPIB     | 19 | 70 | -0.66064  | 18 | 61 | -0.75349  |
| sp O75381 PEX14_PEX14     | 5  | 11 | -0.663651 | 2  | 3  | -0.933058 |
| sp Q8IXU6 S35F2_ISLC35F2  | 2  | 5  | -0.664559 | 0  | 1  | 0         |
| sp Q9NUP9 LIN7C_LIN7C     | 5  | 22 | -0.665619 | 4  | 10 | -0.906215 |
| sp O95817 BAG3_BAG3       | 6  | 10 | -0.665865 | 2  | 6  | -0.631402 |
| sp O60701 UGDH_UGDH       | 17 | 21 | -0.665874 | 12 | 9  | -0.335852 |
| sp P09496 CLCA_HCLTA      | 4  | 9  | -0.666118 | 1  | 5  | -0.827423 |
| sp Q9UNF1 MAGD_MAGED2     | 17 | 10 | -0.666413 | 9  | 6  | -0.602712 |
| sp P63092-4 GNAS_GNAS     | 1  | 7  | -0.666618 | 0  | 1  | -0.776675 |
| sp Q9ULH0 KDIS_FKIDINS220 | 5  | 41 | -0.667039 | 1  | 13 | -1.02245  |
| sp Q12767-2 K019_KIAA0195 | 0  | 2  | -0.667133 | 0  | 2  | 0.0133325 |
| sp Q8IWB7 WDFY1WDFY1      | 0  | 3  | -0.667572 | 0  | 1  | -0.78483  |
| sp Q96G23 CERS2_CERS2     | 2  | 6  | -0.668537 | 0  | 2  | -0.567738 |
| sp Q6IAA8 LTOR1_LAMTOR1   | 2  | 8  | -0.669161 | 0  | 4  | 0.593043  |
| sp P52799 EFNB2_EFNB2     | 0  | 1  | -0.669493 | 0  | 1  | -0.899674 |
| sp P41743 KPCI_HIPRKC1    | 0  | 4  | -0.669576 | 0  | 2  | -0.901521 |
| sp Q16513 PKN2_HPKN2      | 9  | 41 | -0.670284 | 0  | 16 | -0.592164 |
| sp Q96F07 CYFP2_CYFIP2    | 9  | 17 | -0.670331 | 2  | 9  | -0.715543 |
| sp Q9H936 GHC1_SLC25A22   | 1  | 2  | -0.672195 | 1  | 2  | -1.67953  |
| sp Q15003 CND2_INCAPH     | 15 | 14 | -0.672818 | 4  | 8  | 0.18695   |
| sp Q08722 CD47_CD47       | 1  | 16 | -0.672913 | 0  | 4  | -0.785944 |
| sp Q9NUQ9 FA49BFAM49B     | 4  | 2  | -0.673037 | 2  | 2  | 0.093573  |
| sp P22061-2 PIMT_PCMT1    | 12 | 19 | -0.673784 | 8  | 8  | -0.945029 |
| sp O95197 RTN3_FRTN3      | 6  | 12 | -0.674141 | 4  | 6  | -1.50776  |
| sp O96011 PX11B_PEX11B    | 1  | 2  | -0.67644  | 0  | 1  | -0.765688 |
| sp P11279 LAMP1_LAMP1     | 8  | 34 | -0.677515 | 1  | 14 | -0.601553 |
| sp P08069 IGF1R_IGF1R     | 0  | 24 | -0.67759  | 0  | 6  | -0.519949 |
| sp Q8N4C8 MINK1_MINK1     | 4  | 12 | -0.682379 | 0  | 7  | -0.827281 |

|                           |     |     |           |     |     |           |
|---------------------------|-----|-----|-----------|-----|-----|-----------|
| sp O14657 TOR1B_TOR1B     | 2   | 17  | -0.683602 | 0   | 2   | -0.668325 |
| sp Q15084-2 PDIA6         | 7   | 28  | -0.684364 | 9   | 14  | -0.690099 |
| sp P47755 CAZA2_CAPZA2    | 5   | 8   | -0.684451 | 5   | 1   | -0.760193 |
| sp P39748 FEN1_HFEN1      | 15  | 24  | -0.684496 | 11  | 8   | -0.41301  |
| sp Q9BZQ6 EDEM3EDEM3      | 0   | 3   | -0.684803 | 1   | 1   | -1.59701  |
| sp Q14156 EFR3A_EFR3A     | 1   | 23  | -0.686787 | 0   | 4   | -0.704543 |
| sp P49419-2 AL7A:ALDH7A1  | 18  | 33  | -0.687943 | 10  | 10  | -0.819013 |
| sp Q6IQ22 RAB12_RAB12     | 3   | 9   | -0.689562 | 0   | 6   | -0.780976 |
| sp Q8NCA5 FA98A_FAM98A    | 6   | 10  | -0.690037 | 1   | 4   | -0.587589 |
| sp Q5BJF2 TMM97TMEM97     | 2   | 4   | -0.690476 | 3   | 2   | -0.381256 |
| sp P14649 MYL6B_MYL6B     | 4   | 26  | -0.690749 | 0   | 7   | -0.709449 |
| sp Q9UHW9-2 S12_SLC12A6   | 4   | 18  | -0.690798 | 0   | 4   | -0.547756 |
| sp Q9Y320 TMX2_TMX2       | 4   | 8   | -0.691227 | 6   | 6   | -0.332349 |
| sp Q9H299 SH3L3_SH3BGR13  | 6   | 7   | -0.691679 | 6   | 2   | -0.818555 |
| sp Q9Y5J7 TIM9_HTIMM9     | 2   | 2   | -0.691772 | 0   | 1   | 0         |
| sp P61009 SPCS3_SPCS3     | 7   | 14  | -0.692062 | 4   | 6   | -0.807298 |
| sp P13797 PLST_HPLS3      | 35  | 78  | -0.693208 | 22  | 36  | -0.692431 |
| sp P05026 AT1B1_ATP1B1    | 9   | 29  | -0.693215 | 0   | 10  | -0.774398 |
| sp Q9Y3C8 UFC1_UFC1       | 4   | 5   | -0.693487 | 1   | 3   | -0.574278 |
| sp Q32P28 P3H1_HLEPRE1    | 16  | 39  | -0.693715 | 4   | 20  | -0.649074 |
| sp Q9BRJ6 CG050_C7orf50   | 9   | 9   | -0.693916 | 6   | 3   | -0.798482 |
| sp Q92804 RBP56_TAF15     | 11  | 15  | -0.694348 | 11  | 10  | -0.853706 |
| sp P27797 CALR_HCALR      | 63  | 189 | -0.694405 | 54  | 107 | -0.756949 |
| sp O14656 TOR1A_TOR1A     | 1   | 8   | -0.697087 | 2   | 4   | -0.766243 |
| sp P06493 CDK1_FCDK1      | 16  | 25  | -0.697933 | 7   | 2   | -0.648251 |
| sp P11117 PPAL_HACP2      | 3   | 8   | -0.697938 | 4   | 9   | 0.390724  |
| sp P21964 COMT_COMT       | 4   | 19  | -0.69807  | 4   | 10  | -0.584403 |
| sp P46940 IQGA1_IQGAP1    | 210 | 495 | -0.698326 | 125 | 305 | -0.653939 |
| sp Q9BRR6 ADPGKADPGK      | 4   | 12  | -0.698342 | 0   | 4   | -0.410286 |
| sp O75396 SC22B_SEC22B    | 4   | 10  | -0.699381 | 4   | 4   | -0.699058 |
| sp Q5JTV8 TOIP1_ITOR1AIP1 | 10  | 11  | -0.699618 | 8   | 10  | -0.678575 |
| sp P0CG48 UBC_HIIBC       | 53  | 101 | -0.700023 | 35  | 50  | -0.754412 |
| sp Q9H0B6 KLC2_FKLC2      | 1   | 6   | -0.700286 | 1   | 2   | -0.838711 |
| sp Q9P0I2 EMC3_HEMC3      | 5   | 11  | -0.70034  | 2   | 2   | -0.714041 |
| sp P51809 VAMP7_VAMP7     | 2   | 16  | -0.700538 | 2   | 5   | -0.314533 |
| sp P60709 ACTB_HACTB      | 91  | 256 | -0.700978 | 78  | 199 | -0.645756 |
| sp Q8TBQ9 KISHA_TMEM167A  | 2   | 4   | -0.701224 | 1   | 2   | -0.928052 |
| sp Q96566 CLCC1_CLCC1     | 2   | 6   | -0.702961 | 1   | 1   | -0.576582 |
| sp P01116-2 RASK_KRAS     | 5   | 16  | -0.703369 | 1   | 6   | -0.78966  |
| sp O60762 DPM1_DPM1       | 10  | 23  | -0.703483 | 6   | 8   | -0.657762 |
| sp Q9Y4L1 HYOU1_HYOU1     | 65  | 143 | -0.703835 | 22  | 84  | -0.705653 |
| sp P06756 ITAV_HITGAV     | 21  | 124 | -0.704384 | 6   | 58  | -0.664459 |
| sp P50281 MMP14MMP14      | 0   | 5   | -0.704748 | 0   | 1   | -0.981745 |
| sp Q14247 SRC8_FCTTN      | 36  | 80  | -0.705212 | 23  | 41  | -0.681464 |
| sp Q15417 CNN3_ICNN3      | 20  | 34  | -0.705236 | 10  | 22  | -0.799861 |



|                          |     |     |           |     |     |           |
|--------------------------|-----|-----|-----------|-----|-----|-----------|
| sp P18827 SDC1_HSDC1     | 0   | 4   | -0.705351 | 0   | 4   | -0.764988 |
| sp Q86VI3 IQGA3_IQGAP3   | 0   | 5   | -0.708092 | 0   | 1   | -1.01865  |
| sp Q86V81 THOC4.ALYREF   | 9   | 4   | -0.708518 | 8   | 3   | -0.567394 |
| sp Q9UMX5 NENF_NENF      | 0   | 6   | -0.710088 | 1   | 2   | -0.621816 |
| sp P21333 FLNA_HFLNA     | 340 | 794 | -0.710413 | 197 | 429 | -0.70629  |
| sp O75352 MPU1_MPDU1     | 2   | 6   | -0.710798 | 3   | 3   | -0.807478 |
| sp O75915 PRAF3_ARL6IP5  | 6   | 21  | -0.711362 | 2   | 8   | -1.38573  |
| sp P16435 NCPR_FPOR      | 8   | 35  | -0.712216 | 4   | 8   | -0.800005 |
| sp P13667 PDIA4_IPDIA4   | 52  | 166 | -0.715754 | 30  | 109 | -0.719394 |
| sp Q15075 EEA1_1EEA1     | 44  | 35  | -0.715825 | 11  | 5   | -0.423601 |
| sp P30825 CTR1_HSLC7A1   | 1   | 11  | -0.716791 | 0   | 3   | -0.896428 |
| sp Q92643 GPI8_HPIGK     | 5   | 12  | -0.71696  | 0   | 3   | -0.817804 |
| sp O75718 CRTAP_CRTAP    | 4   | 8   | -0.717015 | 0   | 2   | -0.84472  |
| sp A1L0T0 ILVBL_HILVBL   | 5   | 13  | -0.718297 | 1   | 7   | -0.945316 |
| sp Q12792 TWF1_TWF1      | 7   | 9   | -0.720444 | 6   | 7   | -0.67039  |
| sp Q9NPA3 M1IP1_MID1IP1  | 3   | 1   | -0.722247 | 1   | 2   | -0.612805 |
| sp Q7Z3B1 NEGR1_NEGR1    | 0   | 2   | -0.722292 | 0   | 2   | -0.796716 |
| sp Q8NHG7 SVIP_FSVIP     | 0   | 3   | -0.722476 | 0   | 4   | -0.909005 |
| sp Q13586 STIM1_STIM1    | 4   | 15  | -0.723837 | 0   | 4   | -0.750668 |
| sp Q96AG4 LRC59_LRRC59   | 10  | 30  | -0.725665 | 6   | 28  | -0.677694 |
| sp O15269 SPTC1_SPTLC1   | 3   | 8   | -0.728805 | 0   | 4   | -0.701042 |
| sp Q96A33 CCD47_CCD47    | 9   | 39  | -0.730422 | 2   | 10  | -0.954696 |
| sp Q13151 ROA0_IHNRNPA0  | 9   | 2   | -0.731317 | 6   | 2   | -0.152043 |
| sp Q9NVA4 T184C_TMEM184C | 0   | 3   | -0.733367 | 0   | 3   | -0.626383 |
| sp Q9P2B2 FPRP_FPTGFRN   | 4   | 33  | -0.735033 | 0   | 14  | -0.740747 |
| sp P46977 STT3A_STT3A    | 4   | 15  | -0.735542 | 1   | 2   | -0.733563 |
| sp Q9NYB9 ABI2_FABI2     | 5   | 8   | -0.737372 | 2   | 2   | -0.732649 |
| tr K7ELL7 K7ELL7_IPRKCSH | 2   | 4   | -0.737846 | 2   | 6   | -0.7058   |
| sp P19404 NDUV2_NDUFV2   | 6   | 10  | -0.738184 | 5   | 4   | -0.918891 |
| sp Q13618 CUL3_FCUL3     | 9   | 7   | -0.738657 | 3   | 3   | -0.335305 |
| sp Q01970 PLCB3_PLCB3    | 12  | 29  | -0.739046 | 3   | 5   | -0.245605 |
| sp Q8WVX9 FACR1FAR1      | 3   | 8   | -0.739274 | 2   | 3   | -0.531976 |
| sp O75531 BAF_HUBANF1    | 16  | 19  | -0.739661 | 9   | 9   | -0.400405 |
| sp Q9ULQ1-3 TPC1TPCN1    | 1   | 4   | -0.740023 | 0   | 3   | 0.121027  |
| sp Q16643-3 DREBDBN1     | 17  | 42  | -0.745583 | 7   | 12  | -0.798948 |
| sp O43670-2 ZLN20_ZNF207 | 6   | 6   | -0.746387 | 3   | 3   | -1.2976   |
| sp Q9BQ61 CS043_C19orf43 | 3   | 3   | -0.747158 | 1   | 1   | -0.963994 |
| sp Q96C24 SYTL4_SYTL4    | 0   | 14  | -0.750813 | 0   | 2   | -0.645117 |
| sp Q9BR76 COR1B_CORO1B   | 1   | 6   | -0.751062 | 0   | 1   | -0.826213 |
| sp P15311 EZRI_HIEZR     | 44  | 252 | -0.751496 | 12  | 88  | -0.728757 |
| sp Q10472 GALT1_GALNT1   | 4   | 18  | -0.751538 | 2   | 11  | -0.596388 |
| sp Q00610 CLH1_FCLTC     | 95  | 127 | -0.751567 | 34  | 48  | -0.813732 |
| sp Q9NYU2 UGGG_UGGT1     | 32  | 92  | -0.752582 | 11  | 41  | -0.733479 |
| sp Q9H4G0-2 E41L_EPB41L1 | 2   | 10  | -0.753856 | 0   | 5   | -0.717563 |
| sp Q00765 REEP5_REEP5    | 6   | 10  | -0.755403 | 3   | 2   | 0.944463  |

|                          |    |     |           |    |    |           |
|--------------------------|----|-----|-----------|----|----|-----------|
| sp P20020 AT2B1_ATP2B1   | 19 | 116 | -0.756146 | 2  | 62 | -0.632541 |
| sp Q658J3 POTEE_POTEE    | 6  | 20  | -0.757453 | 2  | 5  | 1.36704   |
| sp Q5T3F8 TM63B_TM63B    | 0  | 4   | -0.75781  | 0  | 1  | -0.495936 |
| sp O43852-3 CALU_CALU    | 33 | 102 | -0.758156 | 24 | 69 | -0.841419 |
| sp Q14108 SCR2_SCARB2    | 6  | 47  | -0.758884 | 3  | 19 | 0         |
| sp Q9H0A8 COMD.COMMD4    | 4  | 5   | -0.75894  | 1  | 1  | -0.755316 |
| sp O14776 TCRG1_TCERG1   | 34 | 1   | -0.759478 | 8  | 3  | -0.342251 |
| sp P26368 U2AF2_U2AF2    | 13 | 3   | -0.762217 | 4  | 2  | -1.07749  |
| sp P61158 ARP3_HACTR3    | 6  | 11  | -0.762822 | 3  | 11 | -0.885849 |
| sp P04844 RPN2_RPN2      | 26 | 76  | -0.76323  | 9  | 31 | -0.804041 |
| sp O95302 FKBP9_FKBP9    | 7  | 17  | -0.764203 | 8  | 12 | -0.653584 |
| sp Q68D85 NR3L1_NCR3LG1  | 0  | 6   | -0.764422 | 0  | 3  | -0.812257 |
| sp Q6P4Q7 CNNM.CNNM4     | 0  | 15  | -0.76478  | 0  | 3  | -0.629356 |
| sp P08754 GNAI3_GNAI3    | 1  | 17  | -0.769735 | 0  | 2  | -1.03877  |
| sp O43169 CYB5B_CYB5B    | 3  | 7   | -0.769811 | 2  | 2  | -0.71646  |
| sp Q8N392 RHG18_ARHGAP18 | 11 | 25  | -0.770524 | 0  | 7  | -0.818837 |
| sp P59998-3 ARPC.ARPC4   | 5  | 10  | -0.771582 | 1  | 5  | -1.06569  |
| sp P84085 ARF5_HARF5     | 10 | 9   | -0.771597 | 7  | 2  | -1.7878   |
| sp Q8TCJ2 STT3B_ISTT3B   | 13 | 30  | -0.772154 | 2  | 5  | -0.925688 |
| sp Q8N3R9 MPP5_MPP5      | 0  | 21  | -0.776198 | 0  | 2  | -0.606296 |
| sp Q5T5P2 SKT_HUKIAA1217 | 6  | 7   | -0.776921 | 5  | 3  | -0.576845 |
| sp Q969M3-3 YIPF.YIPF5   | 1  | 4   | -0.777232 | 1  | 1  | -0.824507 |
| sp Q8TDW0 LRC8CLRRC8C    | 0  | 29  | -0.778091 | 0  | 4  | -0.676026 |
| sp Q99536 VAT1_FVAT1     | 11 | 22  | -0.778722 | 11 | 20 | -0.814519 |
| sp Q9NV96 CC50A_TM63B    | 2  | 14  | -0.780198 | 1  | 5  | -0.13289  |
| sp Q15005 SPCS2_SPCS2    | 6  | 12  | -0.782267 | 0  | 7  | -0.935789 |
| sp Q96SU4-6 OSBLOSPL9    | 8  | 11  | -0.782633 | 1  | 7  | -0.363377 |
| sp O14807 RASM_MRAS      | 0  | 3   | -0.783824 | 0  | 1  | -0.82564  |
| sp Q9NTJ5 SAC1_F_SACM1L  | 2  | 16  | -0.784399 | 0  | 4  | -0.689733 |
| sp O15145 ARPC3_ARPC3    | 6  | 10  | -0.78519  | 1  | 5  | -0.828137 |
| sp Q8WUF5 IASPP_PPP1R13L | 3  | 4   | -0.788786 | 2  | 2  | -0.687825 |
| sp Q14699 RFTN1_RFTN1    | 1  | 28  | -0.790378 | 0  | 10 | -0.759705 |
| sp Q9UJZ1 STML2_STOML2   | 6  | 18  | -0.790549 | 5  | 10 | -1.28197  |
| sp P21291 CSR1_CSR1      | 21 | 69  | -0.790552 | 10 | 25 | -1.12476  |
| sp Q96E17 RAB3C_RAB3C    | 1  | 6   | -0.790594 | 1  | 3  | -0.522021 |
| sp Q14644 RASA3_RASA3    | 1  | 6   | -0.790678 | 0  | 2  | -0.435672 |
| sp P50570 DYN2_FDYN2     | 32 | 32  | -0.792997 | 9  | 5  | -1.03156  |
| sp Q14165 MLEC_IMLEC     | 9  | 23  | -0.794217 | 7  | 8  | -0.858785 |
| sp Q9H3Z4-2 DNJC DNAJC5  | 4  | 11  | -0.796955 | 1  | 6  | 0         |
| sp O75083 WDR1_WDR1      | 26 | 55  | -0.79865  | 20 | 34 | -0.649155 |
| sp Q92783 STAM1_STAM     | 3  | 8   | -0.798949 | 2  | 4  | -0.601923 |
| sp P67775 PP2AA_PPP2CA   | 2  | 3   | -0.799003 | 1  | 1  | 0.286569  |
| sp Q16851 UGPA_UGP2      | 14 | 22  | -0.799175 | 7  | 9  | -0.844119 |
| sp P14314-2 GLU2_PRKCSH  | 43 | 79  | -0.799995 | 16 | 37 | -0.868208 |
| sp Q8IVT2 MISP_HMISP     | 4  | 21  | -0.800014 | 0  | 3  | -0.446545 |

|                          |     |     |           |    |     |           |
|--------------------------|-----|-----|-----------|----|-----|-----------|
| sp Q9HC07 TM165TMEM165   | 17  | 32  | -0.800455 | 12 | 24  | -0.622777 |
| sp Q15067 ACOX1_ACOX1    | 5   | 10  | -0.800792 | 0  | 2   | -0.619461 |
| sp Q9Y6N7-2 ROB(ROBO1    | 9   | 63  | -0.802462 | 2  | 22  | -0.957767 |
| sp P46063 RECQ1_RECQL    | 23  | 13  | -0.80292  | 12 | 10  | -0.690156 |
| sp P23469 PTPRE_PTPRE    | 0   | 4   | -0.803549 | 0  | 1   | -0.967722 |
| sp P62736 ACTA_FACTA2    | 102 | 232 | -0.803684 | 70 | 161 | -0.727353 |
| sp Q9NV70 EXOC1_EXOC1    | 2   | 13  | -0.804283 | 0  | 1   | -0.872162 |
| sp P48449 ERG7_FLSS      | 6   | 14  | -0.804339 | 2  | 8   | -0.730271 |
| sp O15144 ARPC2_ARPC2    | 24  | 60  | -0.80434  | 17 | 15  | -0.92047  |
| sp P23528 COF1_FCFL1     | 80  | 198 | -0.807897 | 41 | 61  | -0.849939 |
| sp P51572-2 BAP3_BCAP31  | 14  | 43  | -0.808369 | 4  | 15  | -0.86271  |
| sp Q52LJ0-2 FA98EFAM98B  | 7   | 3   | -0.808698 | 4  | 1   | -0.986181 |
| sp Q9BTV4 TMM4:TMEM43    | 3   | 13  | -0.809053 | 0  | 4   | -0.712265 |
| sp Q15907 RB11B_RAB11B   | 12  | 29  | -0.812749 | 8  | 14  | -0.729167 |
| sp Q6PIU2-2 NCEHNCEH1    | 3   | 7   | -0.815546 | 0  | 3   | -1.27266  |
| sp Q99650 OSMR_OSMR      | 3   | 9   | -0.816013 | 0  | 4   | -0.567109 |
| sp Q7Z2K8 GRIN1_GPRIN1   | 1   | 13  | -0.816934 | 0  | 3   | -0.927551 |
| sp Q08257 QOR_HCRYZ      | 11  | 21  | -0.817446 | 8  | 7   | -0.401896 |
| sp Q8NFQ8 TOIP2_TOR1AIP2 | 3   | 23  | -0.817567 | 1  | 5   | -0.581337 |
| sp Q96A49 SYAP1_SYAP1    | 7   | 3   | -0.817629 | 7  | 3   | -1.19975  |
| sp P98196 AT11A_ATP11A   | 0   | 3   | -0.817727 | 0  | 1   | -0.59422  |
| sp P11021 GRP78_HSPA5    | 106 | 318 | -0.820116 | 69 | 236 | -0.790596 |
| sp Q92508 PIEZ1_PIEZO1   | 2   | 7   | -0.820266 | 0  | 4   | -0.58623  |
| sp P67812 SC11A_SEC11A   | 4   | 10  | -0.822346 | 1  | 1   | -0.906568 |
| sp P51828 ADCY7_ADCY7    | 0   | 3   | -0.822465 | 0  | 1   | -1.20097  |
| sp P32856 STX2_HSTX2     | 0   | 10  | -0.822715 | 0  | 3   | -0.383969 |
| sp P52294 IMA5_FKPNA1    | 7   | 4   | -0.824225 | 1  | 1   | 0.0397892 |
| sp O15260 SURF4_SURF4    | 6   | 19  | -0.824744 | 0  | 5   | -0.894522 |
| sp O95425 SVIL_HISVIL    | 17  | 38  | -0.82615  | 6  | 10  | -0.751938 |
| sp P11233 RALA_HRALA     | 4   | 17  | -0.827371 | 3  | 6   | -1.02893  |
| sp O14966 RAB7L_RAB7L1   | 0   | 4   | -0.828116 | 0  | 2   | -0.774129 |
| sp P61160-2 ARP2_ACTR2   | 10  | 29  | -0.828484 | 12 | 13  | -0.784045 |
| sp P13861 KAP2_HPRKAR2A  | 5   | 11  | -0.829463 | 5  | 2   | -0.734027 |
| sp P61020 RAB5B_RAB5B    | 4   | 18  | -0.830035 | 0  | 16  | -0.905942 |
| sp Q14194-2 DPYL_CRMP1   | 10  | 19  | -0.831069 | 9  | 14  | -0.456665 |
| sp O15143 ARC1B_ARPC1B   | 11  | 12  | -0.831094 | 5  | 7   | -0.566543 |
| sp Q9H4G0 E41L1_EPB41L1  | 19  | 88  | -0.831215 | 1  | 32  | -0.781631 |
| sp P61106 RAB14_RAB14    | 10  | 26  | -0.831707 | 6  | 10  | -0.840478 |
| sp P35270 SPRE_HSPR      | 3   | 7   | -0.832511 | 0  | 2   | -0.632773 |
| sp Q9UIQ6 LCAP_HLNPEP    | 15  | 67  | -0.832758 | 2  | 17  | -0.912275 |
| sp Q96S52 PIGS_HPIGS     | 2   | 5   | -0.833918 | 0  | 1   | 0.839627  |
| sp P48723 HSP13_HSPA13   | 3   | 10  | -0.834433 | 0  | 1   | -0.185085 |
| sp Q9BXS9 S26A6_SLC26A6  | 0   | 7   | -0.835411 | 0  | 2   | -0.587414 |
| sp P06396 GELS_HGSN      | 21  | 29  | -0.836944 | 7  | 11  | -0.743165 |
| sp Q14651 PLSI_HIPLS1    | 1   | 4   | -0.837302 | 2  | 2   | 0.315394  |

|                           |     |     |           |    |     |           |
|---------------------------|-----|-----|-----------|----|-----|-----------|
| sp P09110 THIK_H ACAA1    | 0   | 6   | -0.839136 | 0  | 1   | -1.12064  |
| sp P02794 FRIH_H FIFTH1   | 17  | 28  | -0.839374 | 4  | 3   | -0.969182 |
| sp Q13428-4 TCOF TCOF1    | 66  | 39  | -0.840435 | 31 | 5   | -0.684871 |
| sp P29992 GNA11_GNA11     | 0   | 22  | -0.841123 | 0  | 12  | -0.800792 |
| sp P36873-2 PP1G_PPP1CC   | 5   | 7   | -0.842278 | 4  | 1   | 0.090422  |
| sp Q8TCT9 HM13_HM13       | 6   | 39  | -0.843117 | 10 | 32  | -0.786922 |
| sp Q99569-2 PKP4_PKP4     | 0   | 19  | -0.843526 | 0  | 8   | -1.00678  |
| sp O60658 PDE8A_PDE8A     | 1   | 3   | -0.844821 | 0  | 2   | -1.00848  |
| sp P16144 ITB4_H ITGB4    | 3   | 14  | -0.844829 | 0  | 8   | -0.409647 |
| sp Q9H6B4 CLMP_CLMP       | 0   | 6   | -0.845548 | 0  | 2   | -0.554873 |
| sp Q9Y6M4-2 KC1 CSNK1G3   | 0   | 20  | -0.849428 | 0  | 5   | -0.75732  |
| sp P27824 CALX_H CANX     | 65  | 162 | -0.8495   | 23 | 89  | -0.880788 |
| sp Q9BRX8 F213A_FAM213A   | 1   | 13  | -0.85009  | 1  | 4   | -0.756742 |
| sp P19256 LFA3_H CD58     | 1   | 8   | -0.850164 | 0  | 7   | -0.838168 |
| sp Q9Y6A9 SPCS1_SPCS1     | 3   | 11  | -0.851646 | 2  | 5   | -0.871452 |
| sp Q96Q45-3 TM2 TMEM237   | 2   | 12  | -0.853635 | 0  | 8   | -1.13425  |
| sp Q05707 COEA1_COL14A1   | 4   | 17  | -0.856117 | 2  | 5   | -0.59134  |
| sp P63000-2 RAC1_RAC1     | 5   | 21  | -0.85745  | 2  | 11  | -0.979747 |
| sp Q8IVF7 FMNL3_FMNL3     | 0   | 7   | -0.858069 | 0  | 4   | -1.78669  |
| sp O60669 MOT2_SLC16A7    | 2   | 13  | -0.859709 | 0  | 5   | -0.694704 |
| sp P78310 CXAR_F CXADR    | 5   | 55  | -0.859968 | 3  | 23  | -0.941988 |
| sp Q02809 PLOD1_PLOD1     | 19  | 51  | -0.862881 | 12 | 38  | -0.885989 |
| sp P20339 RAB5A_RAB5A     | 2   | 15  | -0.863903 | 7  | 12  | -0.832601 |
| sp P15121 ALDR_H AKR1B1   | 19  | 27  | -0.863937 | 12 | 7   | -1.07625  |
| sp Q6UW63 KDEL1 KDEL1     | 2   | 12  | -0.864052 | 1  | 4   | -0.747543 |
| sp Q12923-4 PTN1 PTPN13   | 4   | 59  | -0.865626 | 0  | 12  | -1.02761  |
| sp P46459 NSF_H NSF       | 20  | 58  | -0.866512 | 10 | 28  | -0.96718  |
| sp P51153 RAB13_RAB13     | 1   | 24  | -0.867724 | 0  | 6   | -0.990746 |
| sp Q8NB49 AT11C_ATP11C    | 0   | 17  | -0.869331 | 0  | 8   | -0.651332 |
| sp Q8NBJ5 GT251_COLGALT1  | 12  | 42  | -0.869432 | 3  | 16  | -0.376571 |
| sp Q9GZU7-2 CTDS CTDSP1   | 0   | 4   | -0.87069  | 0  | 2   | -0.177485 |
| sp P22694-2 KAPCI PRKACB  | 5   | 10  | -0.871154 | 2  | 3   | -0.514263 |
| sp P14625 ENPL_H HSP90B1  | 115 | 246 | -0.871417 | 39 | 154 | -0.897618 |
| sp P62256 UBE2H_UBE2H     | 4   | 10  | -0.871467 | 5  | 2   | -0.796515 |
| sp Q9BUF5 TBB6_F TUBB6    | 8   | 8   | -0.871847 | 5  | 2   | -1.2586   |
| sp A6NDU8 CE051_C5orf51   | 4   | 2   | -0.872092 | 4  | 2   | -0.865158 |
| sp O43491 E41L2_EPB41L2   | 37  | 156 | -0.872908 | 9  | 57  | -0.877684 |
| sp Q9Y2T2 AP3M1 AP3M1     | 4   | 4   | -0.873335 | 0  | 1   | -0.853892 |
| sp P13987 CD59_F CD59     | 2   | 9   | -0.873974 | 2  | 5   | -0.907858 |
| sp Q9UPY5 XCT_H SLC7A11   | 6   | 26  | -0.875131 | 1  | 20  | -0.842154 |
| sp Q9BSJ8-2 ESYT1 ESYT1   | 22  | 54  | -0.880615 | 6  | 24  | -0.881745 |
| sp P08581 MET_H HIMET     | 3   | 34  | -0.881317 | 0  | 8   | -0.864812 |
| sp O75643 U520_F SNRNP200 | 65  | 6   | -0.882568 | 31 | 1   | -0.576227 |
| sp Q9BTU6 P4K2A_P4K2A     | 1   | 16  | -0.88311  | 0  | 4   | -0.488324 |
| sp Q96TA2 YME1_YME1L1     | 1   | 2   | -0.885152 | 0  | 2   | -1.70509  |

|                          |    |     |           |    |     |           |
|--------------------------|----|-----|-----------|----|-----|-----------|
| sp P62834 RAP1A_RAP1A    | 12 | 49  | -0.885466 | 7  | 25  | -0.836814 |
| sp O95466-3 FMNIFMNL1    | 13 | 33  | -0.885635 | 3  | 10  | -1.1627   |
| sp P35914 HMGCL_HMGCL    | 3  | 7   | -0.88601  | 4  | 3   | -1.01069  |
| sp Q9P0V3 SH3B4_SH3BP4   | 6  | 44  | -0.887059 | 0  | 19  | -0.700951 |
| sp O43795 MYO1BMYO1B     | 25 | 105 | -0.889965 | 1  | 42  | -0.92073  |
| sp Q14118 DAG1_IDAG1     | 5  | 42  | -0.890057 | 1  | 12  | -0.885455 |
| sp O95208 EPN2_FEPN2     | 5  | 15  | -0.891478 | 1  | 5   | -0.704421 |
| sp Q9ULC3 RAB23_RAB23    | 2  | 16  | -0.891764 | 3  | 5   | -1.04184  |
| sp P07951-2 TPM2TPM2     | 7  | 15  | -0.891904 | 7  | 16  | -0.926562 |
| sp P30101 PDIA3_IPDIA3   | 51 | 169 | -0.892167 | 25 | 106 | -0.906737 |
| sp Q96C36 P5CR2_PYCR2    | 11 | 5   | -0.892176 | 6  | 6   | -0.187674 |
| sp P40189 IL6RB_IL6ST    | 0  | 16  | -0.892249 | 0  | 2   | 0         |
| sp P09493-3 TPM1TPM1     | 13 | 21  | -0.892727 | 4  | 1   | -1.99623  |
| sp Q96I20 PAWR_IPAWR     | 5  | 11  | -0.893354 | 1  | 4   | -0.447783 |
| sp Q8NC56 LEMD2LEMD2     | 2  | 2   | -0.898129 | 1  | 2   | -0.809211 |
| sp P40616 ARL1_HARL1     | 6  | 1   | -0.899413 | 4  | 2   | -0.727861 |
| sp P62820 RAB1A_RAB1A    | 11 | 31  | -0.901045 | 12 | 15  | -0.950877 |
| sp Q9HOU4 RAB1B_RAB1B    | 6  | 23  | -0.901226 | 6  | 9   | -0.666326 |
| sp P49757 NUMB_NUMB      | 0  | 9   | -0.901495 | 0  | 2   | -0.334406 |
| sp Q9UHG3 PCYOXPCYOX1    | 4  | 18  | -0.902621 | 2  | 3   | -0.863848 |
| sp Q9HDC9 APMAIAPMAP     | 9  | 16  | -0.903232 | 3  | 9   | -1.09048  |
| sp O95070 YIF1A_YIF1A    | 0  | 1   | -0.905001 | 0  | 4   | -1.04338  |
| sp Q8N8S7 ENAH_ENAH      | 4  | 17  | -0.905282 | 8  | 17  | -0.870547 |
| sp O75787 RENR_FATP6AP2  | 3  | 17  | -0.906735 | 2  | 2   | -0.365745 |
| sp P68366 TBA4A_TUBA4A   | 4  | 10  | -0.907246 | 2  | 5   | -0.816556 |
| sp Q9NZ08-2 ERAPERAP1    | 2  | 14  | -0.909591 | 2  | 1   | -0.891279 |
| sp Q9Y5U9 IR3IP_HIER3IP1 | 2  | 3   | -0.910178 | 2  | 2   | -0.764039 |
| sp Q9Y6B6 SAR1B_SAR1B    | 7  | 6   | -0.912026 | 2  | 1   | -1.00028  |
| sp O94979-8 SC31_SEC31A  | 31 | 17  | -0.912442 | 2  | 4   | -0.618181 |
| sp O95292 VAPB_FVAPB     | 12 | 36  | -0.91248  | 9  | 23  | -0.897888 |
| sp Q9NR31 SAR1A_SAR1A    | 6  | 7   | -0.91348  | 4  | 2   | -0.957776 |
| sp O75886 STAM2_STAM2    | 2  | 15  | -0.916756 | 1  | 6   | -1.38475  |
| sp Q9Y426 CU025_C2CD2    | 1  | 7   | -0.916882 | 0  | 5   | -0.565546 |
| sp P57088 TMM33TMEM33    | 3  | 4   | -0.916913 | 0  | 2   | -0.763793 |
| sp O75844 FACE1_ZMPSTE24 | 15 | 50  | -0.917202 | 3  | 18  | -0.610292 |
| sp Q9NYU1 UGGG_UGGT2     | 1  | 18  | -0.918644 | 0  | 1   | -0.575753 |
| sp O94915 FRYL_HFRYL     | 15 | 6   | -0.919382 | 2  | 2   | -0.663925 |
| sp Q8WUX1 S38A5SLC38A5   | 3  | 17  | -0.919444 | 0  | 11  | -0.725876 |
| sp Q9Y5K6 CD2AP_CD2AP    | 5  | 27  | -0.91982  | 4  | 8   | -0.805001 |
| sp Q9Y3B8 ORN_HREXO2     | 3  | 5   | -0.921564 | 1  | 1   | -0.773252 |
| sp Q99715 COCA1_COL12A1  | 25 | 67  | -0.923801 | 0  | 18  | -0.867916 |
| sp P52895 AK1C2_AKR1C2   | 15 | 22  | -0.924734 | 15 | 13  | -0.98058  |
| sp Q9Y3E5 PTH2_FPTRH2    | 4  | 8   | -0.92543  | 4  | 4   | -0.939439 |
| sp P54760 EPHB4_EPHB4    | 0  | 10  | -0.927739 | 0  | 2   | -0.424995 |
| sp Q9HCJ1 ANKH_IANKH     | 0  | 5   | -0.930769 | 0  | 1   | -0.41926  |

|                          |     |     |           |    |     |           |
|--------------------------|-----|-----|-----------|----|-----|-----------|
| sp Q8N9N7 LRC57_LRRC57   | 7   | 22  | -0.931782 | 1  | 12  | -0.818964 |
| sp P31040 DHSA_FSDHA     | 14  | 30  | -0.931937 | 5  | 14  | -1.14284  |
| sp Q14642 I5P1_H_INPP5A  | 0   | 7   | -0.934336 | 0  | 1   | 0.124534  |
| sp Q7L1W4 LRC8D_LRRC8D   | 0   | 80  | -0.935987 | 0  | 36  | -0.873844 |
| sp P29966 MARCS_MARCKS   | 37  | 107 | -0.937018 | 19 | 62  | -1.03258  |
| sp Q96RT1-8 LAP2_ERBB2IP | 7   | 105 | -0.938049 | 0  | 61  | -0.89392  |
| sp Q03113 GNA12_GNA12    | 4   | 18  | -0.938066 | 2  | 13  | -0.996332 |
| sp Q96EY8 MMAB_MMAB      | 4   | 3   | -0.93847  | 2  | 2   | -1.27235  |
| sp Q9NZW5 MPP6_MPP6      | 4   | 25  | -0.942089 | 1  | 9   | -1.08671  |
| sp Q9NUQ7 UFSP2_UFSP2    | 4   | 14  | -0.942199 | 0  | 3   | -2.56882  |
| sp O75116 ROCK2_ROCK2    | 34  | 116 | -0.94238  | 8  | 41  | -0.835961 |
| sp Q8TAT6-2 NPL4_NPLOC4  | 12  | 11  | -0.943997 | 8  | 8   | -0.776576 |
| sp Q14677-3 EPN4_CLINT1  | 15  | 17  | -0.944489 | 7  | 11  | -0.492429 |
| sp P11234 RALB_HRALB     | 2   | 26  | -0.945072 | 1  | 9   | -1.00735  |
| sp Q9NPH3-5 IL1A IL1RAP  | 0   | 3   | -0.947398 | 0  | 1   | -1.05461  |
| sp O75122 CLAP2_CLASP2   | 6   | 5   | -0.948209 | 4  | 3   | -0.599146 |
| sp Q9UKE5 TNIK_FTNIK     | 2   | 11  | -0.948927 | 0  | 4   | -0.533681 |
| sp Q9NRR3 C42S2_CDC42SE2 | 1   | 10  | -0.9508   | 3  | 7   | -0.847284 |
| sp Q9NZ45 CISD1_CISD1    | 8   | 14  | -0.952511 | 3  | 6   | -0.953213 |
| sp O15511-2 ARPCARPC5    | 8   | 18  | -0.952894 | 3  | 5   | -1.09559  |
| sp Q9UNF0 PACN2_PACSIN2  | 6   | 17  | -0.954235 | 5  | 15  | -0.977808 |
| sp Q13813-2 SPTN_SPTAN1  | 192 | 421 | -0.955014 | 82 | 203 | -0.944998 |
| sp P27449 VATL_HATP6VOC  | 7   | 21  | -0.9566   | 1  | 7   | -0.538376 |
| sp Q96KP1 EXOC2_EXOC2    | 13  | 31  | -0.956818 | 1  | 10  | -1.11427  |
| sp Q15262-3 PTPR_PTPRK   | 0   | 12  | -0.95813  | 0  | 6   | -1.40815  |
| sp Q9NSV4 DIAP3_DIAPH3   | 11  | 14  | -0.95822  | 1  | 2   | -0.242273 |
| sp P67870 CSK2B_CSNK2B   | 5   | 6   | -0.958224 | 6  | 1   | 0.0509057 |
| sp P61026 RAB10_RAB10    | 11  | 36  | -0.958502 | 1  | 11  | -1.11252  |
| sp Q12965 MYO1E_MYO1E    | 27  | 68  | -0.958561 | 6  | 27  | -1.1087   |
| sp Q99747 SNAG_INAPG     | 7   | 12  | -0.958569 | 1  | 3   | -0.628966 |
| sp P16615 AT2A2_ATP2A2   | 36  | 87  | -0.959781 | 10 | 49  | -0.980224 |
| sp P07237 PDIA1_IP4HB    | 66  | 190 | -0.959895 | 32 | 96  | -0.892658 |
| sp Q9H6E4 CC134_CCDC134  | 5   | 12  | -0.96294  | 1  | 4   | -0.844086 |
| sp Q9NX47 MARH! 5-Mar    | 1   | 2   | -0.965213 | 0  | 1   | 0         |
| sp O00264 PGR1_PGRMC1    | 5   | 9   | -0.971736 | 5  | 5   | -1.76951  |
| sp Q9HCC0 MCCB_MCCC2     | 2   | 11  | -0.972039 | 1  | 4   | -0.833358 |
| sp Q15286 RAB35_RAB35    | 3   | 18  | -0.975013 | 1  | 8   | -1.00215  |
| sp P61006 RAB8A_RAB8A    | 15  | 46  | -0.976566 | 4  | 14  | -0.984233 |
| sp P60981 DEST_HDSTN     | 10  | 17  | -0.977198 | 12 | 4   | -1.20439  |
| sp P42126 EC1_HIECI1     | 3   | 6   | -0.977219 | 1  | 1   | -1.45222  |
| sp Q13136 LIPA1_IPPFIA1  | 7   | 12  | -0.9785   | 3  | 3   | -0.87435  |
| sp Q9Y606 TRUA_IPUS1     | 2   | 7   | -0.979156 | 2  | 2   | -0.634937 |
| sp Q9UPT5 EXOC7_EXOC7    | 2   | 27  | -0.980669 | 2  | 4   | -0.19417  |
| sp P00167 CYB5_HCYB5A    | 3   | 7   | -0.981701 | 1  | 2   | -0.222332 |
| sp O00116 ADAS_IAGPS     | 17  | 35  | -0.981925 | 6  | 12  | -1.10397  |

|                           |     |     |           |    |     |           |
|---------------------------|-----|-----|-----------|----|-----|-----------|
| sp Q2M2I8 AAK1_IAAK1      | 12  | 21  | -0.98249  | 3  | 9   | -1.27996  |
| sp Q14BN4 SLMAPSLMAP      | 5   | 15  | -0.982861 | 0  | 9   | -1.68642  |
| sp Q14435 GALT3_GALNT3    | 1   | 12  | -0.984197 | 0  | 2   | -0.986862 |
| sp P61421 VAOD1_ATP6VOD1  | 4   | 22  | -0.98547  | 0  | 12  | -0.569058 |
| sp Q8IWA4 MFN1_MFN1       | 0   | 3   | -0.985493 | 0  | 1   | -1.71747  |
| sp Q92692-2 PVRL_PVRL2    | 1   | 5   | -0.987737 | 0  | 4   | -0.592269 |
| sp Q2PZI1 D19L1_IDPY19L1  | 0   | 8   | -0.988311 | 0  | 3   | -1.07979  |
| sp Q13740 CD166_ALCAM     | 11  | 65  | -0.99142  | 1  | 43  | -1.07596  |
| sp P30044 PRDX5_PRDX5     | 15  | 30  | -0.99166  | 7  | 7   | -1.30645  |
| sp Q9NW15 ANO1_ANO10      | 0   | 16  | -0.991742 | 1  | 8   | -1.30553  |
| sp Q14344 GNA13_GNA13     | 2   | 18  | -0.994028 | 0  | 4   | -1.25707  |
| sp Q8TBX8 PI42C_IPIP4K2C  | 1   | 12  | -0.994249 | 0  | 7   | -0.759834 |
| sp Q12959-2 DLG1_DLG1     | 7   | 43  | -0.99433  | 2  | 16  | -0.912793 |
| sp Q01082 SPTB2_SPTBN1    | 142 | 335 | -0.994364 | 64 | 127 | -1.04719  |
| sp P17252 KPCA_HPRKCA     | 13  | 32  | -0.995246 | 10 | 20  | -0.477924 |
| sp O43852-4 CALU_CALU     | 3   | 7   | -0.999448 | 2  | 3   | -1.26134  |
| sp P32455 GBP1_FGBP1      | 9   | 12  | -1.0002   | 5  | 2   | -2.10692  |
| sp Q8N8Z6 DCBD1_DCBLD1    | 0   | 3   | -1.00159  | 0  | 5   | -1.49117  |
| sp P50148 GNAQ_GNAQ       | 0   | 9   | -1.00202  | 0  | 5   | -1.07954  |
| sp Q9P206-2 K152.KIAA1522 | 0   | 7   | -1.00206  | 0  | 1   | -0.733835 |
| sp P61224 RAP1B_RAP1B     | 4   | 11  | -1.00296  | 4  | 10  | -0.990037 |
| sp P84157 MXRA7_MXRA7     | 1   | 5   | -1.00507  | 2  | 4   | -1.13146  |
| sp Q8N6T3-2 ARFCARFGAP1   | 6   | 2   | -1.00674  | 3  | 2   | 0.0717033 |
| sp Q6IAN0 DRS7B_DHRS7B    | 1   | 3   | -1.00829  | 0  | 1   | -0.944953 |
| sp Q86Y82 STX12_STX12     | 3   | 8   | -1.00907  | 0  | 3   | -0.160225 |
| sp P18031 PTN1_HPTPN1     | 8   | 22  | -1.01198  | 3  | 13  | -1.26589  |
| sp Q6GMV3 PTRD1PTRHD1     | 2   | 9   | -1.01443  | 1  | 2   | -1.21816  |
| sp Q96DM3 MIC1_C18orf8    | 0   | 4   | -1.01633  | 0  | 1   | -0.994527 |
| sp Q9Y639 NPTN_INPTN      | 4   | 29  | -1.01766  | 0  | 12  | -1.32591  |
| sp P62070 RRAS2_RRAS2     | 1   | 27  | -1.01836  | 0  | 10  | -0.96663  |
| sp Q9Y679 AUP1_I AUP1     | 1   | 9   | -1.01838  | 0  | 2   | -0.111141 |
| sp Q13464 ROCK1_ROCK1     | 19  | 67  | -1.01848  | 1  | 23  | -1.00623  |
| sp Q8N2K1-3 UB2J_UBE2J2   | 0   | 4   | -1.01886  | 0  | 4   | -0.362094 |
| sp O95139 NDUB6_NDUB6     | 5   | 9   | -1.01927  | 1  | 1   | -0.654774 |
| sp Q3ZAQ7 VMA2_VMA21      | 0   | 2   | -1.0196   | 0  | 2   | -0.626283 |
| sp Q8NBX0 SCPDL_SCCPDH    | 4   | 11  | -1.02105  | 1  | 4   | -1.37982  |
| sp Q7L311 ARMX2_ARMCX2    | 4   | 7   | -1.02334  | 2  | 4   | -0.895495 |
| sp P11047 LAMC1_LAMC1     | 26  | 55  | -1.02373  | 7  | 25  | -0.930569 |
| sp P04792 HSPB1_HSPB1     | 18  | 26  | -1.02481  | 8  | 10  | -1.13008  |
| sp Q53EPO FND3B_FNDC3B    | 5   | 10  | -1.02501  | 4  | 3   | -2.21608  |
| sp Q9P035 HACD3_PTPLAD1   | 13  | 27  | -1.02987  | 2  | 7   | -1.14812  |
| sp O96005 CLPT1_CLPTM1    | 10  | 23  | -1.03029  | 2  | 10  | -1.00913  |
| sp Q92626 PXDN_IPXDN      | 8   | 19  | -1.03068  | 0  | 4   | -1.09172  |
| sp P35240-2 MERLNF2       | 0   | 8   | -1.03165  | 0  | 2   | -1.07548  |
| sp Q15599-2 NHRFSLC9A3R2  | 0   | 4   | -1.03336  | 0  | 2   | -0.462798 |

|                          |    |     |          |    |    |            |
|--------------------------|----|-----|----------|----|----|------------|
| sp P13674-2 P4HA P4HA1   | 10 | 26  | -1.04077 | 6  | 10 | -1.11411   |
| sp P04216 THY1_HTHY1     | 1  | 7   | -1.04091 | 1  | 6  | -0.895283  |
| sp Q16762 THTR_FTST      | 4  | 8   | -1.04127 | 0  | 2  | -1.29284   |
| sp P16520 GBB3_FTGNB3    | 0  | 3   | -1.04221 | 0  | 2  | -1.09995   |
| sp Q9BYT8 NEUL_FNLN      | 13 | 19  | -1.04247 | 1  | 3  | -1.17291   |
| sp Q6T4R5 NHS_H NHS      | 0  | 15  | -1.04284 | 0  | 8  | -1.31636   |
| sp O75165 DJC13_DNAJC13  | 22 | 48  | -1.0442  | 7  | 16 | -0.862763  |
| sp O95361 TRI16_ITRIM16  | 17 | 21  | -1.04631 | 7  | 2  | -0.637105  |
| sp Q5NDL2 EOGT_EOGT      | 1  | 1   | -1.0486  | 0  | 2  | -0.366247  |
| sp Q9UBX3-2 DIC_SLC25A10 | 10 | 15  | -1.05174 | 6  | 7  | -1.09254   |
| sp O95169 NDUB8_NDUFB8   | 4  | 6   | -1.05215 | 5  | 4  | -0.372355  |
| sp P24752 THIL_HIACAT1   | 7  | 18  | -1.05654 | 7  | 8  | -1.2214    |
| sp Q8NE01 CNM3:CNM3      | 0  | 7   | -1.05753 | 0  | 2  | 0          |
| sp Q9C0K1 S39A8_SLC39A8  | 0  | 1   | -1.05765 | 0  | 1  | -0.308271  |
| sp O14908 GIPC1_GIPC1    | 1  | 5   | -1.06103 | 1  | 1  | -0.564007  |
| sp Q99470 SDF2_FT_SDF2   | 6  | 18  | -1.06123 | 6  | 8  | -0.937523  |
| sp Q9UL26 RB22A_RAB22A   | 0  | 7   | -1.06212 | 0  | 2  | -1.08609   |
| sp Q6DD88 ATLA3_ATL3     | 13 | 31  | -1.0638  | 15 | 29 | -1.07766   |
| sp O75503 CLN5_FTCLN5    | 0  | 2   | -1.06436 | 0  | 1  | -0.909419  |
| sp Q86WC4 OSTM_OSTM1     | 0  | 7   | -1.0647  | 0  | 3  | 0.497922   |
| sp Q99755-3 PI51#PIP5K1A | 0  | 16  | -1.06598 | 0  | 4  | 0          |
| sp Q13011 ECH1_FTCH1     | 11 | 12  | -1.06613 | 3  | 1  | -0.459608  |
| sp O14639 ABLM1_ABLIM1   | 3  | 6   | -1.06644 | 2  | 14 | -0.823913  |
| sp Q96A65 EXOC4_EXOC4    | 11 | 29  | -1.06708 | 1  | 3  | -0.917833  |
| sp O94973-2 AP2A AP2A2   | 13 | 37  | -1.06945 | 0  | 19 | -1.11992   |
| sp Q9H3M7 TXNIP_TXNIP    | 0  | 11  | -1.06947 | 0  | 3  | 0.246253   |
| sp Q9BX68 HINT2_HINT2    | 6  | 14  | -1.06947 | 5  | 5  | -1.58272   |
| sp Q9P2E9 RRBP1_RRBP1    | 61 | 108 | -1.07032 | 27 | 52 | -1.05483   |
| sp Q7Z2H8 S36A1_SLC36A1  | 0  | 4   | -1.07082 | 0  | 3  | -0.24192   |
| sp Q16836-2 HCDH_HADH    | 13 | 11  | -1.07355 | 6  | 9  | -1.71568   |
| sp Q9P0K7-2 RAI1*RAI14   | 37 | 99  | -1.07566 | 10 | 51 | -1.02862   |
| sp A2A3N6 PIPSL_IPISL    | 3  | 8   | -1.07605 | 2  | 4  | -0.0251541 |
| sp Q9UIJ7 KAD3_HAK3      | 8  | 14  | -1.07998 | 4  | 4  | -1.26429   |
| sp P51148-2 RAB5RAB5C    | 11 | 26  | -1.08288 | 18 | 25 | -0.975137  |
| sp Q8IWA5-2 CTL2_SLC44A2 | 0  | 8   | -1.08526 | 0  | 7  | -0.713768  |
| sp P04899 GNAI2_GNAI2    | 5  | 45  | -1.08819 | 2  | 26 | -1.26381   |
| sp Q96J84-2 KIRR1_KIRREL | 0  | 6   | -1.08918 | 0  | 4  | -0.577655  |
| sp Q6P3W7 SCYL2_SCYL2    | 8  | 7   | -1.08942 | 3  | 2  | -0.839782  |
| sp Q9NR12 PDLI7_PDLIM7   | 16 | 25  | -1.09333 | 14 | 22 | -0.92968   |
| sp O60493 SNX3_FT_SNX3   | 5  | 9   | -1.0941  | 2  | 2  | -1.15796   |
| sp Q9Y4G6 TLN2_FT_LN2    | 26 | 87  | -1.09741 | 13 | 28 | -1.1301    |
| sp O75521 ECI2_H ECI2    | 7  | 18  | -1.09815 | 2  | 6  | -1.06227   |
| sp O96000 NDUBA_NDUFB10  | 7  | 16  | -1.09834 | 0  | 1  | -0.461423  |
| sp O75208 COQ9_COQ9      | 1  | 1   | -1.10069 | 0  | 1  | -1.04735   |
| sp Q8IUX1 T126B_TM126B   | 1  | 5   | -1.10096 | 2  | 1  | -1.52206   |



|                          |    |     |          |    |    |           |
|--------------------------|----|-----|----------|----|----|-----------|
| sp P07954 FUMH_FH        | 32 | 54  | -1.10258 | 15 | 18 | -1.33772  |
| sp P00846 ATP6_HMT-ATP6  | 5  | 6   | -1.10418 | 2  | 2  | -3.23821  |
| sp O75970 MPDZ_MPDZ      | 3  | 29  | -1.1055  | 2  | 3  | -1.10623  |
| sp Q14696 MESD_MESDC2    | 13 | 28  | -1.10556 | 6  | 15 | -1.12674  |
| sp P26006 ITA3_HIITGA3   | 15 | 57  | -1.10572 | 4  | 25 | -1.21796  |
| sp P78356 PI42B_FPIP4K2B | 2  | 22  | -1.10655 | 1  | 15 | -1.64159  |
| sp P49821 NDUV1_NDUFV1   | 2  | 7   | -1.10713 | 1  | 1  | -1.12998  |
| sp O14974 MYPT1_PPP1R12A | 23 | 63  | -1.10759 | 8  | 32 | -1.58985  |
| sp P04179 SODM_SOD2      | 13 | 25  | -1.10814 | 8  | 11 | -1.36172  |
| sp O75489 NDUS3_NDUFS3   | 8  | 11  | -1.11075 | 2  | 4  | -1.44584  |
| sp Q9Y277-2 VDACVDAC3    | 24 | 56  | -1.11229 | 11 | 35 | -1.09693  |
| sp P31937 3HIDH_HIBADH   | 13 | 21  | -1.11284 | 17 | 15 | -1.50172  |
| sp Q12931 TRAP1_TRAP1    | 28 | 49  | -1.11296 | 8  | 13 | -1.13332  |
| sp O60437 PEPL_HPPL      | 49 | 53  | -1.11301 | 15 | 9  | -1.0506   |
| sp Q8WX93 PALLD_PALLD    | 14 | 34  | -1.11496 | 5  | 5  | -1.26228  |
| sp Q07065 CKAP4_CKAP4    | 33 | 108 | -1.12083 | 17 | 53 | -1.09144  |
| sp P62879 GBB2_FGNB2     | 2  | 22  | -1.12564 | 1  | 14 | -1.02884  |
| sp Q8WVM0 TFB1ITFB1M     | 1  | 7   | -1.12951 | 0  | 1  | -1.54772  |
| sp P57105 SYJ2B_FSYNJ2BP | 3  | 7   | -1.1348  | 3  | 3  | -1.24534  |
| sp Q9UL01 DSE_HIDSE      | 0  | 4   | -1.13988 | 0  | 3  | -0.14475  |
| sp Q6WQC1-2 MPIMPRIP     | 28 | 65  | -1.14029 | 3  | 19 | -1.04401  |
| sp P56199 ITA1_HIITGA1   | 7  | 125 | -1.14132 | 1  | 47 | -1.07394  |
| sp Q16204 CCDC6_CCDC6    | 10 | 1   | -1.14202 | 2  | 1  | -0.655151 |
| sp Q05655 KPCD_FPRKCD    | 0  | 12  | -1.14295 | 1  | 2  | -0.267071 |
| sp P10606 COX5B_COX5B    | 3  | 8   | -1.14307 | 3  | 3  | -1.61417  |
| sp P54289 CA2D1_CACNA2D1 | 10 | 86  | -1.14434 | 4  | 57 | -1.18519  |
| sp Q9UHR4 BI2L1_BAIAP2L1 | 0  | 21  | -1.14698 | 1  | 10 | -1.06003  |
| sp Q8TED1 GPX8_GPX8      | 7  | 13  | -1.14726 | 2  | 3  | -1.12989  |
| sp Q9UHN6 TMEMTMEM2      | 1  | 20  | -1.14871 | 0  | 3  | -1.99414  |
| sp Q16795 NDUA9_NDUFA9   | 6  | 9   | -1.14889 | 2  | 2  | -0.951389 |
| sp Q8N5G0 SMI20_SMIM20   | 2  | 5   | -1.14907 | 2  | 1  | -1.8601   |
| sp P28331-2 NDUSNDUFS1   | 10 | 24  | -1.15084 | 0  | 5  | -1.13854  |
| sp Q9BT09 CNPY3_CNPY3    | 2  | 6   | -1.15097 | 5  | 5  | -0.868828 |
| sp Q96BR5 SELR1_SELRC1   | 2  | 6   | -1.15213 | 0  | 1  | -1.65527  |
| sp P98194 AT2C1_ATP2C1   | 9  | 19  | -1.15624 | 1  | 10 | -0.711086 |
| sp Q9BZG1 RAB34_RAB34    | 9  | 29  | -1.15675 | 2  | 7  | -1.0028   |
| sp Q70UQ0-4 IKIP_IKBIP   | 14 | 24  | -1.15754 | 4  | 14 | -0.913577 |
| sp O15118 NPC1_NPC1      | 5  | 11  | -1.15797 | 0  | 1  | 0.0213222 |
| sp P48960 CD97_FCD97     | 3  | 32  | -1.15912 | 1  | 13 | -1.14158  |
| sp Q9NPJ3 ACO13_ACOT13   | 5  | 10  | -1.15936 | 4  | 3  | -1.57416  |
| sp O15460 P4HA2_P4HA2    | 5  | 9   | -1.16012 | 0  | 4  | -1.17491  |
| sp Q03001 DYST_FDST      | 79 | 195 | -1.16502 | 21 | 50 | -0.984928 |
| sp Q00059 TFAM_TFAM      | 8  | 13  | -1.16552 | 1  | 4  | -1.45955  |
| sp P35232 PHB_HUPHB      | 5  | 19  | -1.16684 | 3  | 6  | -1.28903  |
| sp P28288 ABCD3_ABCD3    | 3  | 11  | -1.16819 | 0  | 4  | -0.553332 |

|                         |    |     |          |    |     |           |
|-------------------------|----|-----|----------|----|-----|-----------|
| sp O43181 NDUS4_NDUFS4  | 6  | 7   | -1.16925 | 1  | 1   | -1.23588  |
| sp Q9ULV4-3 COR1CORO1C  | 7  | 19  | -1.16943 | 2  | 9   | -0.702951 |
| sp P84095 RHOG_IRHOG    | 4  | 18  | -1.17044 | 4  | 14  | -1.21658  |
| sp P05091 ALDH2_ALDH2   | 13 | 33  | -1.17105 | 11 | 17  | -1.36082  |
| sp P08670 VIME_FVIM     | 96 | 76  | -1.17165 | 61 | 35  | -0.942323 |
| sp Q9UM00 TMCOTMCO1     | 4  | 10  | -1.17237 | 1  | 3   | -1.02664  |
| sp Q9HAC8 UBTD1_UBTD1   | 0  | 7   | -1.17283 | 0  | 1   | -0.926788 |
| sp Q9C0E8 LNP_HLNP      | 0  | 9   | -1.17393 | 2  | 6   | -0.855815 |
| sp Q99808 S29A1_SLC29A1 | 0  | 8   | -1.17394 | 0  | 1   | -1.37192  |
| sp Q9BZF9 UACA_UACA     | 1  | 13  | -1.17474 | 0  | 6   | -1.57169  |
| sp Q96CW1 AP2M_AP2M1    | 5  | 34  | -1.17559 | 2  | 14  | -1.2274   |
| sp P32456 GBP2_FGBP2    | 4  | 2   | -1.1784  | 2  | 1   | -0.254465 |
| sp P05556 ITB1_HUITGB1  | 30 | 177 | -1.18118 | 10 | 73  | -1.22314  |
| sp Q9NXD2 MTMRMTMR10    | 0  | 9   | -1.18211 | 0  | 4   | -1.58508  |
| sp P02786 TFR1_HTFRC    | 98 | 265 | -1.18221 | 42 | 133 | -1.20127  |
| sp P54819 KAD2_HAK2     | 20 | 35  | -1.1847  | 13 | 14  | -1.43444  |
| sp P23458 JAK1_H_JAK1   | 0  | 20  | -1.18714 | 0  | 11  | -1.06106  |
| sp Q6UWP7 LCLT1_LCLAT1  | 0  | 6   | -1.18884 | 0  | 4   | -1.18884  |
| sp O00217 NDUS8_NDUFS8  | 7  | 11  | -1.18898 | 1  | 2   | -1.3117   |
| sp P10114 RAP2A_RAP2A   | 0  | 4   | -1.19051 | 0  | 1   | -1.19706  |
| tr E7EN19 E7EN19_MAP4K4 | 0  | 4   | -1.19118 | 0  | 2   | -1.06294  |
| sp Q7L2E3-2 DHX3_DHX30  | 16 | 27  | -1.1913  | 5  | 5   | -1.5681   |
| sp Q9UBC2-2 EP15EPS15L1 | 18 | 39  | -1.19148 | 1  | 12  | -1.12661  |
| sp P23634 AT2B4_ATP2B4  | 7  | 43  | -1.1916  | 1  | 26  | -1.06093  |
| sp Q9Y4D7 PLXD1_PLXND1  | 1  | 45  | -1.19605 | 0  | 12  | -1.04517  |
| sp P82909 RT36_HMRPS36  | 4  | 11  | -1.19668 | 4  | 8   | 0         |
| sp Q15147-4 PLCB_PLCB4  | 0  | 22  | -1.20051 | 0  | 2   | -1.23449  |
| sp P08574 CY1_HL_CY1    | 14 | 15  | -1.20257 | 5  | 14  | -1.38241  |
| sp P07942 LAMB1_LAMB1   | 27 | 62  | -1.20299 | 5  | 20  | -1.23419  |
| sp O14523-2 C2C2_C2CD2L | 0  | 4   | -1.20681 | 0  | 1   | -0.821195 |
| sp Q8WUH6 CL023C12orf23 | 11 | 7   | -1.20884 | 7  | 2   | 0.0923222 |
| sp Q99623 PHB2_PHB2     | 10 | 16  | -1.21768 | 4  | 5   | -1.28426  |
| sp O95490-6 LPHNLPHN2   | 0  | 7   | -1.21852 | 0  | 2   | -1.29907  |
| sp P22307 NLTP_HSCP2    | 15 | 28  | -1.22304 | 6  | 20  | -1.28422  |
| sp P51159 RB27A_RAB27A  | 6  | 10  | -1.22311 | 2  | 4   | -1.27957  |
| sp P51553 IDH3G_IDH3G   | 1  | 3   | -1.22722 | 0  | 2   | 1.64948   |
| sp O60613 SEP15_15-Sep  | 2  | 9   | -1.2295  | 3  | 3   | -1.0727   |
| sp Q9HCP0 KC1G1_CSNK1G1 | 0  | 1   | -1.22965 | 0  | 1   | -1.1208   |
| sp Q9UBR5 CKLF_FCKLF    | 0  | 3   | -1.23376 | 0  | 1   | -1.17944  |
| sp O95299 NDUAAANDUFA10 | 3  | 7   | -1.23647 | 2  | 5   | -1.15309  |
| sp P63010-2 AP2B_AP2B1  | 32 | 106 | -1.23832 | 12 | 60  | -1.34836  |
| sp P00505 AATM_IGOT2    | 16 | 35  | -1.23931 | 11 | 16  | -1.44686  |
| sp Q9H7Z7 PGES2_PTGES2  | 11 | 23  | -1.24033 | 3  | 9   | -1.74802  |
| sp Q8TCT8 SPP2A_SPPL2A  | 1  | 14  | -1.24291 | 1  | 7   | -0.237699 |
| sp Q14571 ITPR2_ITPR2   | 11 | 24  | -1.24606 | 1  | 3   | -1.07545  |

|                          |     |      |          |     |      |           |
|--------------------------|-----|------|----------|-----|------|-----------|
| sp Q8IWT6 LRC8A_LRRC8A   | 5   | 39   | -1.24648 | 1   | 19   | -1.11878  |
| sp P22830-2 HEMF FECH    | 3   | 9    | -1.24825 | 2   | 4    | -1.22032  |
| sp P60660-2 MYL6.MYL6    | 16  | 45   | -1.24889 | 5   | 6    | -1.44672  |
| sp Q13217 DNJC3_DNAJC3   | 5   | 18   | -1.25179 | 0   | 4    | -1.36234  |
| sp Q9H5I5-4 PIEZ2_PIEZO2 | 2   | 19   | -1.25202 | 0   | 5    | -1.00713  |
| sp Q16698 DECR_FDECR1    | 7   | 6    | -1.25447 | 2   | 1    | -0.765514 |
| sp Q13492 PICAL_IPICALM  | 8   | 25   | -1.25667 | 2   | 18   | -1.14923  |
| sp P18085 ARF4_HARF4     | 20  | 19   | -1.25727 | 4   | 3    | -1.19091  |
| sp P54886 P5CS_HALDH18A1 | 16  | 19   | -1.25752 | 10  | 8    | -0.998239 |
| sp P23786 CPT2_HCPT2     | 9   | 13   | -1.26065 | 1   | 8    | -0.823331 |
| sp O00159 MYO1C.MYO1C    | 26  | 89   | -1.26157 | 3   | 25   | -1.35134  |
| sp Q09666 AHNK_AHNAK     | 600 | 2005 | -1.26177 | 308 | 1053 | -1.27442  |
| sp P62072 TIM10_TIMM10   | 7   | 7    | -1.26306 | 1   | 5    | -1.30038  |
| sp Q8IXI1 MIRO2_IRHOT2   | 3   | 5    | -1.26368 | 1   | 3    | -1.49599  |
| sp P82663 RT25_HMRPS25   | 4   | 10   | -1.26375 | 3   | 4    | -1.67417  |
| tr H3BQK9 H3BQK:MACF1    | 82  | 234  | -1.26664 | 30  | 64   | -1.19617  |
| sp Q92747 ARC1A_ARPC1A   | 2   | 4    | -1.27201 | 1   | 2    | -0.681105 |
| sp P35222 CTNB1_CTNNB1   | 7   | 40   | -1.27231 | 6   | 24   | -1.26837  |
| sp Q9BRT2 UQCC2_UQCC2    | 2   | 2    | -1.27336 | 0   | 2    | -1.42537  |
| sp Q9UL25 RAB21_RAB21    | 3   | 14   | -1.2754  | 2   | 4    | -0.896212 |
| sp Q9H223 EHD4_EHD4      | 8   | 18   | -1.27637 | 2   | 15   | -1.24139  |
| sp Q6ZV5 TMT3_TMT3       | 1   | 19   | -1.27659 | 0   | 7    | -0.888062 |
| sp P30405 PIF_HPIF       | 4   | 7    | -1.27916 | 3   | 7    | -1.85245  |
| sp P42892 ECE1_HECE1     | 14  | 75   | -1.28515 | 6   | 37   | -1.22069  |
| sp Q96Q11 TRNT1_TRNT1    | 9   | 8    | -1.28622 | 5   | 6    | -1.33316  |
| sp P46821 MAP1B_MAP1B    | 140 | 221  | -1.28725 | 111 | 122  | -1.11795  |
| sp Q9Y2Q3-2 GSTKGSTK1    | 12  | 32   | -1.28737 | 7   | 12   | -1.38998  |
| sp O95470 SGPL1_SGPL1    | 4   | 13   | -1.2876  | 1   | 8    | -1.27415  |
| sp Q6YHK3 CD109_CD109    | 0   | 18   | -1.28773 | 0   | 4    | -1.42355  |
| sp Q9H4M9 EHD1_EHD1      | 15  | 42   | -1.28783 | 9   | 18   | -1.17774  |
| sp P46939 UTRO_UTRN      | 55  | 206  | -1.28817 | 14  | 66   | -1.30451  |
| sp Q9H2U2-2 IPYR.PPA2    | 22  | 24   | -1.28988 | 15  | 9    | -1.0294   |
| sp P30042 ES1_HUC21orf33 | 9   | 10   | -1.29011 | 3   | 4    | -1.84076  |
| sp P53680 AP2S1_AP2S1    | 0   | 15   | -1.29198 | 0   | 4    | -1.2406   |
| sp Q9UEY8 ADDG_ADD3      | 3   | 2    | -1.29225 | 1   | 2    | -0.566427 |
| sp P36957 ODO2_IDLST     | 19  | 38   | -1.29225 | 15  | 19   | -1.29256  |
| sp P11498 PYC_HUPC       | 26  | 27   | -1.29902 | 6   | 12   | -1.4033   |
| sp Q9NWM8 FKB1_FKBP14    | 4   | 10   | -1.30029 | 0   | 4    | -1.15259  |
| sp O15439 MRP4_ABCC4     | 2   | 79   | -1.30086 | 0   | 20   | -1.20061  |
| sp Q96AC1-3 FERM.FERMT2  | 25  | 95   | -1.30307 | 8   | 56   | -1.40391  |
| sp P19367-3 HXX1_HK1     | 16  | 17   | -1.30413 | 1   | 4    | -1.39812  |
| sp Q07021 C1QBP_C1QBP    | 27  | 36   | -1.30537 | 12  | 35   | -1.20875  |
| sp P03928 ATP8_HMT-ATP8  | 8   | 8    | -1.30877 | 2   | 8    | -1.68078  |
| sp Q15942 ZYX_HUZYX      | 17  | 45   | -1.30972 | 16  | 21   | -1.36338  |
| sp Q9Y490 TLN1_FTLN1     | 116 | 245  | -1.311   | 73  | 179  | -1.1083   |

|                          |    |     |          |    |    |           |
|--------------------------|----|-----|----------|----|----|-----------|
| sp Q969Z0 TBRG4_TBRG4    | 6  | 7   | -1.31263 | 4  | 3  | -2.09524  |
| sp P00387-3 NB5R_CYB5R3  | 17 | 43  | -1.31298 | 7  | 21 | -1.24792  |
| sp Q8WUM9 S20A_SLC20A1   | 0  | 8   | -1.31435 | 0  | 3  | -0.778879 |
| sp Q9UBP9 GULP1_GULP1    | 3  | 25  | -1.31487 | 0  | 8  | -1.34457  |
| sp P12694 ODBA_IBCKDHA   | 3  | 8   | -1.31794 | 0  | 1  | -1.37748  |
| sp O95831 AIFM1_AIFM1    | 19 | 47  | -1.31794 | 10 | 21 | -1.42307  |
| sp Q9BPW8 NIPS1_NIPSNAP1 | 7  | 14  | -1.32074 | 6  | 10 | -0.805351 |
| sp O14907 TX1B3_TAX1BP3  | 2  | 4   | -1.32358 | 3  | 2  | -1.54659  |
| sp Q9BUV8-5 CTO2C20orf24 | 0  | 5   | -1.32485 | 0  | 1  | -1.19865  |
| sp Q92930 RAB8B_RAB8B    | 0  | 13  | -1.32988 | 0  | 1  | -1.60353  |
| sp Q86W92 LIPB1_PPFIBP1  | 22 | 37  | -1.33361 | 4  | 14 | -0.691456 |
| sp Q96DB5 RMD1_RMDN1     | 6  | 15  | -1.33686 | 0  | 4  | -1.97483  |
| sp Q96JJ7 TMX3_HTMX3     | 14 | 32  | -1.33727 | 5  | 18 | -1.31655  |
| sp P15260 INGR1_IFNGR1   | 0  | 4   | -1.34102 | 0  | 1  | -0.935266 |
| sp O75923-13 DYS_DYSF    | 3  | 9   | -1.34234 | 1  | 5  | -1.4577   |
| sp Q5T653 RM02_MRPL2     | 2  | 3   | -1.34759 | 1  | 2  | -1.78406  |
| sp P51398 RT29_HDAP3     | 4  | 9   | -1.35127 | 2  | 2  | 1.07702   |
| sp O95782 AP2A1_AP2A1    | 9  | 30  | -1.35137 | 0  | 11 | -1.42212  |
| sp Q9Y3D9 RT23_FMRPS23   | 9  | 10  | -1.35325 | 4  | 8  | -1.31065  |
| sp Q8NDI1 EHBP1_EHBP1    | 3  | 8   | -1.3537  | 2  | 4  | -1.94752  |
| sp P09493-6 TPM1_TPM1    | 16 | 21  | -1.35488 | 6  | 3  | -1.864    |
| sp Q96AQ6 PBI1_PBXIP1    | 4  | 13  | -1.3571  | 0  | 4  | -0.95724  |
| sp P09669 COX6C_COX6C    | 4  | 11  | -1.35907 | 2  | 1  | -1.39121  |
| sp P50454 SERPH_SERPINH1 | 35 | 120 | -1.36063 | 17 | 63 | -1.42473  |
| sp O15382 BCAT2_BCAT2    | 6  | 10  | -1.36252 | 3  | 4  | -1.70117  |
| sp Q9BUR5 APOO_APOO      | 2  | 4   | -1.36313 | 1  | 3  | -1.28648  |
| sp O00469-2 PLOD_PLOD2   | 29 | 77  | -1.3641  | 7  | 31 | -1.3509   |
| sp P21912 DHSB_DSDB      | 8  | 10  | -1.36564 | 8  | 5  | -1.47912  |
| sp Q16718 NDUA5_NDUFA5   | 6  | 13  | -1.36643 | 6  | 5  | -1.55753  |
| sp P49914 MTHFS_MTHFS    | 2  | 1   | -1.36798 | 0  | 2  | -0.648402 |
| sp P51659-2 DHB4_HSD17B4 | 24 | 69  | -1.3683  | 11 | 30 | -1.1924   |
| sp Q9NP72-2 RAB1RAB18    | 3  | 9   | -1.3698  | 5  | 4  | -1.18544  |
| sp Q8IY22 CMIP_HCMIP     | 1  | 3   | -1.3795  | 0  | 2  | -1.39477  |
| sp P05141 ADT2_SLC25A5   | 11 | 38  | -1.38021 | 8  | 19 | -1.71406  |
| sp Q9UQE7 SMC3_SMC3      | 71 | 22  | -1.38167 | 10 | 3  | -0.971249 |
| sp Q8N3D4 EH1L1_EHBP1L1  | 7  | 36  | -1.384   | 9  | 17 | -1.37206  |
| sp P35221 CTNA1_CTNNA1   | 29 | 101 | -1.38618 | 9  | 66 | -1.48503  |
| sp P49411 EFTU_HTUFM     | 25 | 65  | -1.38793 | 14 | 30 | -1.5971   |
| sp Q7KYR7-1 BT2A_BTN2A1  | 0  | 8   | -1.39192 | 0  | 4  | -1.53706  |
| sp Q9BQ52 RNZ2_ELAC2     | 8  | 3   | -1.39419 | 1  | 2  | -1.74545  |
| sp Q9BWH2 FUND_FUNDC2    | 0  | 6   | -1.39466 | 0  | 1  | -1.70674  |
| sp P60033 CD81_CD81      | 2  | 9   | -1.39776 | 0  | 3  | -1.19063  |
| sp Q9H0A0 NAT10_NAT10    | 26 | 2   | -1.40104 | 4  | 2  | -0.395232 |
| sp P48426 PI42A_PIP4K2A  | 0  | 10  | -1.40148 | 0  | 1  | -1.27605  |
| sp O00161 SNP23_SNAP23   | 11 | 37  | -1.4016  | 4  | 21 | -1.43881  |

|                         |    |     |          |    |     |           |
|-------------------------|----|-----|----------|----|-----|-----------|
| sp Q6P1L8 RM14_IMRPL14  | 3  | 4   | -1.4052  | 1  | 3   | -2.04562  |
| sp Q5T9L3-2 WLS_WLS     | 1  | 8   | -1.40924 | 0  | 2   | -1.56945  |
| sp Q9UII2 ATIF1_HATPIF1 | 2  | 2   | -1.41178 | 1  | 2   | -1.56777  |
| sp P21796 VDAC1_VDAC1   | 54 | 127 | -1.41396 | 39 | 110 | -1.52275  |
| sp Q7Z434 MAVS_MAVS     | 4  | 5   | -1.41425 | 1  | 2   | -0.986523 |
| sp P26232 CTNA2_CTNA2   | 2  | 11  | -1.41518 | 2  | 10  | -1.10971  |
| sp Q63ZY3-2 KANKKANK2   | 4  | 22  | -1.41702 | 2  | 5   | -1.45231  |
| tr H0YGQ3 H0YGQ_MPDZ    | 1  | 4   | -1.4172  | 0  | 1   | -0.310205 |
| sp P23434 GCSH_FGCSH    | 9  | 14  | -1.42099 | 13 | 11  | -2.00344  |
| sp Q86XL3 ANKL2_ANKLE2  | 5  | 6   | -1.42946 | 0  | 1   | -1.30149  |
| sp O00214-2 LEG8_LGALS8 | 0  | 17  | -1.43033 | 0  | 3   | -1.39372  |
| sp Q15811 ITSN1_ITSN1   | 12 | 10  | -1.43341 | 3  | 2   | -1.49433  |
| sp P27144 KAD4_FAK4     | 7  | 9   | -1.43359 | 4  | 5   | -1.61315  |
| sp Q15388 TOM20TOMM20   | 1  | 5   | -1.43506 | 1  | 2   | 0         |
| sp O60716 CTND1_CTND1   | 20 | 85  | -1.44225 | 7  | 44  | -1.44417  |
| sp O14950 ML12B_MYL12B  | 16 | 47  | -1.45081 | 5  | 16  | -1.47957  |
| sp Q8TAD7 OCC1_OCC1     | 0  | 9   | -1.45182 | 0  | 4   | -1.78026  |
| sp Q9NVV4 PAPD1_MTPAP   | 2  | 7   | -1.45391 | 0  | 3   | -1.88695  |
| sp O43570 CAH12_CA12    | 0  | 5   | -1.45459 | 0  | 3   | -1.45411  |
| sp P08962 CD63_CD63     | 14 | 47  | -1.45681 | 4  | 20  | -1.25284  |
| sp Q9P032 NDUF4_NDUFAF4 | 4  | 13  | -1.4589  | 3  | 3   | -1.78151  |
| sp P12236 ADT3_SLC25A6  | 13 | 31  | -1.45935 | 6  | 18  | -1.83706  |
| sp Q05682 CALD1_CALD1   | 38 | 136 | -1.46057 | 18 | 59  | -1.44374  |
| sp Q9NXU5 ARL15_ARL15   | 0  | 4   | -1.4617  | 0  | 1   | -1.75123  |
| sp P31930 QCR1_FUQCRC1  | 8  | 16  | -1.46346 | 3  | 5   | -1.67011  |
| sp Q16270 IBP7_HIGFBP7  | 5  | 13  | -1.46466 | 1  | 1   | -1.15476  |
| sp P13073 COX41_COX41   | 12 | 26  | -1.46747 | 6  | 5   | -1.60887  |
| sp Q9P265 DIP2B_DIP2B   | 9  | 27  | -1.46763 | 3  | 10  | -1.68322  |
| sp Q5JTJ3-2 COA6_COA6   | 2  | 4   | -1.46803 | 2  | 3   | -1.85136  |
| sp P15144 AMPN_ANPEP    | 6  | 43  | -1.4732  | 1  | 17  | -1.26631  |
| sp Q6Y288 B3GLT_B3GALTL | 0  | 3   | -1.4739  | 0  | 2   | -1.6208   |
| sp Q02978 M2OM_SLC25A11 | 3  | 17  | -1.47423 | 1  | 5   | -1.66208  |
| sp P38117-2 ETFB_ETFB   | 11 | 24  | -1.47518 | 5  | 9   | -1.79985  |
| sp O60313-2 OPA1_OPA1   | 30 | 43  | -1.47593 | 8  | 18  | -1.44486  |
| sp P20674 COX5A_COX5A   | 5  | 12  | -1.48021 | 7  | 5   | -1.70371  |
| sp Q8NBS9 TXND5_TXNDC5  | 7  | 20  | -1.48024 | 1  | 3   | -1.59648  |
| sp Q16540 RM23_MRPL23   | 2  | 4   | -1.48359 | 2  | 2   | -1.54171  |
| sp P10586 PTPRF_PTPRF   | 0  | 9   | -1.48463 | 0  | 2   | -0.851798 |
| sp Q9Y2R5 RT17_FMRPS17  | 3  | 5   | -1.48664 | 0  | 1   | -1.65071  |
| sp P01024 CO3_HLC3      | 0  | 9   | -1.48671 | 0  | 2   | -1.004    |
| sp P19022 CADH2_CDH2    | 5  | 42  | -1.48673 | 1  | 24  | -1.63658  |
| sp Q9NZM1 MYOF_MYOF     | 98 | 355 | -1.48721 | 53 | 218 | -1.44776  |
| sp Q92552 RT27_FMRPS27  | 8  | 14  | -1.48754 | 0  | 7   | -1.72846  |
| sp P43121 MUC18_MCAM    | 20 | 86  | -1.48814 | 13 | 51  | -1.42427  |
| sp Q8N3V7 SYNPO_SYNPO   | 5  | 6   | -1.48829 | 1  | 1   | -0.867707 |

|                          |     |      |          |     |     |           |
|--------------------------|-----|------|----------|-----|-----|-----------|
| sp O75962 TRIO_HTRIO     | 17  | 29   | -1.48846 | 4   | 4   | -1.20334  |
| sp Q99714 HCD2_IHSD17B10 | 2   | 7    | -1.49339 | 1   | 4   | -2.05831  |
| sp P14927 QCR7_FUQCRB    | 11  | 17   | -1.49559 | 7   | 4   | -1.58518  |
| sp Q92665 RT31_FMRPS31   | 2   | 8    | -1.49794 | 4   | 4   | -0.663909 |
| sp P45880-1 VDACVDAC2    | 24  | 49   | -1.49802 | 14  | 20  | -1.90509  |
| sp A4D1E9 GTPBA_GTPBP10  | 3   | 12   | -1.50319 | 0   | 2   | -1.05722  |
| sp P48060 GLIP1_FGLIPR1  | 0   | 11   | -1.50468 | 0   | 2   | -1.35266  |
| sp Q13423 NNTM_NNT       | 58  | 87   | -1.50681 | 19  | 37  | -1.68218  |
| sp P35579 MYH9_IMYH9     | 344 | 1111 | -1.51014 | 168 | 609 | -1.52418  |
| sp P53007 TXTP_HSLC25A1  | 5   | 7    | -1.51149 | 2   | 2   | -1.43738  |
| sp P82650 RT22_HMRPS22   | 8   | 12   | -1.5123  | 2   | 2   | -1.53598  |
| sp Q14195-2 DPYL.DPYSL3  | 31  | 35   | -1.51893 | 13  | 8   | -1.02486  |
| sp Q8N983 RM43_MRPL43    | 5   | 5    | -1.52188 | 1   | 1   | -1.62598  |
| sp Q9H857 NT5D2.NT5DC2   | 0   | 2    | -1.52288 | 1   | 1   | 0         |
| sp P57737-3 COROCORO7    | 3   | 2    | -1.52289 | 1   | 1   | -1.29111  |
| sp P25705 ATPA_FATP5A1   | 27  | 64   | -1.52853 | 23  | 29  | -1.85773  |
| sp Q9NVS2-2 RT18MRPS18A  | 4   | 3    | -1.52981 | 0   | 1   | -1.83358  |
| sp Q9Y6R1-5 S4A4.SLC4A4  | 0   | 2    | -1.53344 | 0   | 2   | -0.868979 |
| sp Q8IYB8 SUV3_HSUPV3L1  | 2   | 6    | -1.53503 | 1   | 1   | -1.69865  |
| sp P18859-2 ATP5JATP5J   | 5   | 9    | -1.53578 | 4   | 5   | -1.95507  |
| sp Q9H845 ACAD9.ACAD9    | 6   | 15   | -1.53907 | 3   | 7   | -1.28427  |
| sp O00483 NDUA4.NDUFA4   | 6   | 7    | -1.53946 | 1   | 3   | -1.56295  |
| sp P82914 RT15_HMRPS15   | 3   | 9    | -1.53977 | 1   | 6   | -1.54713  |
| sp P43304 GPD_M_GPD2     | 11  | 31   | -1.54045 | 2   | 11  | -1.27532  |
| sp P38571 LICH_HILIPA    | 0   | 5    | -1.5426  | 0   | 2   | -0.676777 |
| sp Q96EY1 DNJA3_DNAJA3   | 7   | 14   | -1.54491 | 4   | 3   | -1.65098  |
| sp P82664 RT10_HMRPS10   | 8   | 12   | -1.54766 | 2   | 6   | -1.94564  |
| sp P27105 STOM_STOM      | 8   | 47   | -1.54854 | 1   | 19  | -1.3324   |
| sp P99999 CYC_HLCYCS     | 12  | 15   | -1.54857 | 8   | 7   | -1.54182  |
| sp P13804 ETF_A_HETF_A   | 18  | 36   | -1.55524 | 12  | 12  | -1.20639  |
| sp P34897 GLYM_SHMT2     | 14  | 31   | -1.55564 | 5   | 13  | -1.32454  |
| sp P01130 LDLR_HLDLR     | 2   | 16   | -1.55718 | 1   | 6   | -1.38143  |
| sp Q9BW72 HIG2AHIGD2A    | 2   | 3    | -1.55757 | 1   | 2   | -0.839978 |
| sp P56181-2 NDUVNDUFV3   | 5   | 11   | -1.5577  | 6   | 11  | -1.29531  |
| sp P22695 QCR2_FUQCRC2   | 12  | 18   | -1.56495 | 11  | 8   | -1.37453  |
| sp O43674 NDUB5.NDUFB5   | 0   | 3    | -1.56533 | 3   | 1   | -1.0352   |
| sp Q9NX14-2 NDU.NDUFB11  | 3   | 5    | -1.56694 | 2   | 4   | -1.37018  |
| sp Q13637 RAB32_RAB32    | 9   | 26   | -1.56743 | 7   | 7   | -1.52289  |
| sp Q96GC5 RM48_MRPL48    | 2   | 8    | -1.56757 | 3   | 3   | -1.52667  |
| sp Q6V0I7 FAT4_HFAT4     | 0   | 7    | -1.56863 | 0   | 3   | -2.50436  |
| sp Q00325 MPCP_SLC25A3   | 17  | 37   | -1.57055 | 8   | 14  | -1.99059  |
| sp Q99798 ACON_ACO2      | 51  | 64   | -1.57319 | 16  | 30  | -1.32589  |
| sp Q9NSE4 SYIM_FIARS2    | 26  | 42   | -1.57677 | 12  | 14  | -1.68879  |
| sp O75947 ATP5H_ATP5H    | 14  | 29   | -1.57764 | 4   | 13  | -1.71715  |
| sp Q8IVF2 AHNK2_AHNAK2   | 128 | 211  | -1.57905 | 53  | 86  | -1.66492  |

|                         |     |     |          |     |     |           |
|-------------------------|-----|-----|----------|-----|-----|-----------|
| sp P24539 AT5F1_ATP5F1  | 11  | 25  | -1.58174 | 5   | 6   | -1.8497   |
| sp P11177 ODPB_IPDHB    | 15  | 22  | -1.58411 | 7   | 14  | -1.88171  |
| sp Q9NX63 CHCH3CHCHD3   | 4   | 17  | -1.58446 | 9   | 13  | -2.07732  |
| sp Q99439 CNN2_ICNN2    | 14  | 20  | -1.58691 | 11  | 8   | -1.54068  |
| sp O14561 ACPM_NDUFAB1  | 2   | 6   | -1.58824 | 3   | 5   | -1.97191  |
| sp P35749-2 MYH1MYH11   | 35  | 75  | -1.5887  | 17  | 45  | -1.42487  |
| sp P51636 CAV2_FCAV2    | 4   | 10  | -1.59016 | 0   | 4   | -1.88042  |
| sp O75964 ATP5L_ATP5L   | 7   | 14  | -1.59189 | 6   | 6   | -1.91113  |
| sp Q8NCN5 PDPR_PDPR     | 5   | 7   | -1.59935 | 0   | 5   | -1.06647  |
| sp O95164 UBL3_FUBL3    | 0   | 6   | -1.59943 | 0   | 2   | -1.93678  |
| sp Q68CZ2 TENS3_TNS3    | 19  | 28  | -1.60155 | 3   | 7   | -1.09197  |
| sp P36776 LONM_LONP1    | 19  | 37  | -1.6021  | 11  | 28  | -1.70032  |
| sp Q9H078 CLPB_FCLPB    | 1   | 4   | -1.60265 | 0   | 1   | -1.78825  |
| sp P11310-2 ACADACADM   | 13  | 22  | -1.60314 | 9   | 5   | -1.38486  |
| sp O00330 ODPX_IPDHX    | 3   | 12  | -1.60427 | 1   | 5   | -1.8349   |
| sp Q9Y6C9 MTCH2MTCH2    | 9   | 17  | -1.60517 | 1   | 2   | -2.36313  |
| sp Q9BZE1 RM37_MRPL37   | 7   | 10  | -1.60995 | 2   | 3   | -0.485016 |
| sp P10809 CH60_FHSPD1   | 168 | 427 | -1.61009 | 119 | 259 | -1.581    |
| sp P61587 RND3_FRND3    | 0   | 8   | -1.61047 | 0   | 1   | -1.5718   |
| sp P43897 EFTS_HITSFM   | 10  | 17  | -1.61346 | 4   | 7   | -1.65347  |
| sp Q96A26 F162A_FAM162A | 9   | 10  | -1.61385 | 3   | 3   | -1.45063  |
| sp Q8NCG7 DGLB_DAGLB    | 0   | 2   | -1.61395 | 0   | 1   | -0.611097 |
| sp Q6UXV4 APOOLAPOOL    | 17  | 22  | -1.61748 | 6   | 6   | -1.77662  |
| sp P22033 MUTA_MUT      | 1   | 17  | -1.61749 | 1   | 7   | -1.8898   |
| sp Q9NZM3 ITSN2_ITSN2   | 1   | 20  | -1.61941 | 0   | 3   | -1.25341  |
| sp Q8N183 MIMIT_NDUFAF2 | 9   | 22  | -1.62014 | 0   | 4   | -1.56619  |
| sp P10515 ODP2_FDLAT    | 13  | 25  | -1.62034 | 7   | 8   | -1.83452  |
| sp Q8TDX7 NEK7_NEK7     | 5   | 2   | -1.62549 | 1   | 3   | -2.00799  |
| sp Q02218 ODO1_OGDH     | 18  | 38  | -1.62869 | 9   | 8   | -1.5295   |
| sp O75390 CISY_HICS     | 14  | 26  | -1.63057 | 1   | 11  | -2.04395  |
| sp Q04837 SSBP_HSSBP1   | 9   | 14  | -1.63389 | 8   | 5   | -1.68867  |
| sp Q96CS3 FAF2_HFAF2    | 1   | 5   | -1.63865 | 1   | 3   | -1.46576  |
| sp Q4U2R6 RM51_MRPL51   | 0   | 9   | -1.63927 | 0   | 2   | -1.19978  |
| sp P30048 PRDX3_PRDX3   | 5   | 21  | -1.63958 | 9   | 8   | -2.02303  |
| sp P04181 OAT_HLOAT     | 11  | 18  | -1.6447  | 4   | 8   | -1.45778  |
| sp P07355-2 ANXAANXA2   | 61  | 183 | -1.6454  | 42  | 106 | -1.61226  |
| sp Q9BYD2 RM09_MRPL9    | 4   | 10  | -1.64608 | 3   | 4   | -2.31791  |
| sp P42704 LRPPRC_LRPPRC | 79  | 155 | -1.64625 | 27  | 79  | -1.568    |
| sp Q9NZN4 EHD2_EHD2     | 8   | 41  | -1.64965 | 3   | 23  | -1.71871  |
| sp O96008 TOM40TOMM40   | 9   | 25  | -1.65116 | 4   | 9   | -1.68755  |
| sp P49748-3 ACADACADV   | 24  | 43  | -1.65661 | 11  | 20  | -1.43466  |
| sp Q9BYD1 RM13_MRPL13   | 1   | 8   | -1.65683 | 1   | 1   | 0         |
| sp Q5M775 CYTSB_SPECC1  | 14  | 61  | -1.65975 | 3   | 37  | -1.69475  |
| sp P50552 VASP_HVASP    | 5   | 7   | -1.66095 | 0   | 2   | -1.18986  |
| sp Q9NX40 OCAD1OCIAD1   | 3   | 6   | -1.66108 | 1   | 3   | -1.47418  |

|                         |    |     |          |    |     |           |
|-------------------------|----|-----|----------|----|-----|-----------|
| sp Q9BRQ8 AIFM2_AIFM2   | 0  | 9   | -1.66161 | 0  | 6   | -0.915431 |
| sp P82673 RT35_HMRPS35  | 5  | 10  | -1.6617  | 1  | 4   | -1.6878   |
| sp Q9BQ95 ECSIT_ECSIT   | 2  | 3   | -1.66193 | 0  | 1   | -1.29809  |
| sp Q9Y4W6 AFG32AFG3L2   | 8  | 22  | -1.66276 | 1  | 10  | -1.60875  |
| sp P06576 ATPB_HATP5B   | 47 | 103 | -1.66393 | 29 | 58  | -1.6466   |
| sp P50213 IDH3A_IDH3A   | 11 | 30  | -1.66688 | 10 | 15  | -1.76265  |
| sp O94826 TOM70TOMM70A  | 6  | 23  | -1.67249 | 0  | 4   | -1.64702  |
| sp Q13813-3 SPTN_SPTAN1 | 0  | 2   | -1.6725  | 0  | 2   | -0.851499 |
| sp P40926 MDHM_MDH2     | 40 | 50  | -1.6741  | 11 | 16  | -1.70178  |
| sp O75431 MTX2_MTX2     | 4  | 3   | -1.67689 | 3  | 5   | -1.95286  |
| sp Q9Y653 GPR56_GPR56   | 0  | 10  | -1.67919 | 0  | 1   | -0.519091 |
| sp Q727H8-2 RM1(MRPL10  | 4  | 8   | -1.68145 | 2  | 4   | -2.16144  |
| sp Q8IXM3 RM41_MRPL41   | 7  | 13  | -1.68487 | 3  | 4   | -1.57757  |
| sp Q96RP9-2 EFGM_GFM1   | 19 | 35  | -1.68616 | 10 | 16  | -1.71548  |
| sp P00367 DHE3_FGLUD1   | 18 | 36  | -1.68863 | 8  | 24  | -1.88011  |
| sp Q8TCS8 PNPT1_PNPT1   | 13 | 43  | -1.68904 | 8  | 17  | -1.51005  |
| sp Q9H9B4 SFXN1_SFXN1   | 6  | 12  | -1.69057 | 10 | 10  | -1.34601  |
| sp Q9HD33 RM47_MRPL47   | 7  | 12  | -1.69091 | 2  | 2   | -1.89156  |
| sp O75616 ERAL1_ERAL1   | 6  | 10  | -1.69117 | 2  | 4   | -2.08243  |
| sp P38646 GRP75_HSPA9   | 87 | 228 | -1.69401 | 64 | 132 | -1.73193  |
| sp Q9Y2R9 RT07_FMRPS7   | 8  | 13  | -1.69445 | 1  | 7   | -1.68344  |
| sp Q15404 RSU1_RSU1     | 13 | 28  | -1.69768 | 3  | 12  | -1.92314  |
| sp Q969G5 PRDBP_PRKDBP  | 4  | 7   | -1.69807 | 0  | 5   | -2.15945  |
| sp Q6EMK4 VASN_VASN     | 2  | 11  | -1.69952 | 0  | 3   | -1.69891  |
| sp Q96E11 RRFM_MRRF     | 7  | 11  | -1.7065  | 2  | 10  | -1.61392  |
| sp Q92667 AKAP1_AKAP1   | 9  | 8   | -1.71133 | 2  | 3   | -1.07913  |
| sp Q9Y5L4 TIM13_TIMM13  | 4  | 8   | -1.7143  | 1  | 1   | -1.73294  |
| sp Q6UB35 C1TM_MTHFD1L  | 34 | 40  | -1.72522 | 10 | 16  | -1.77374  |
| sp Q9BRJ2 RM45_IMRPL45  | 10 | 11  | -1.7254  | 5  | 8   | -1.86275  |
| sp Q6NVY1 HIBCH_HIBCH   | 11 | 18  | -1.72768 | 7  | 11  | -1.56931  |
| sp Q9Y305-4 ACOTACOT9   | 7  | 16  | -1.72807 | 0  | 2   | -1.58471  |
| sp P36542 ATPG_FATP5C1  | 18 | 36  | -1.73244 | 6  | 13  | -1.52694  |
| sp Q8WWC4 CB04_C2orf47  | 4  | 10  | -1.73754 | 3  | 3   | -1.83526  |
| sp O95202 LETM1_LETM1   | 29 | 68  | -1.73786 | 16 | 32  | -1.72175  |
| sp P13995 MTDC_MTHFD2   | 6  | 13  | -1.74118 | 4  | 5   | -1.46387  |
| sp Q6YN16 HSDL2_HSDL2   | 14 | 31  | -1.74121 | 7  | 22  | -1.55978  |
| sp Q12849 GRSF1_GRSF1   | 11 | 11  | -1.74318 | 6  | 10  | -1.7098   |
| sp P16035 TIMP2_TIMP2   | 1  | 4   | -1.74793 | 1  | 3   | -1.82782  |
| sp Q9Y3B7 RM11_MRPL11   | 4  | 9   | -1.74945 | 0  | 2   | -1.94418  |
| sp Q9UHQ4-2 BAP_BCAP29  | 0  | 2   | -1.74947 | 0  | 3   | -0.993665 |
| sp Q9GZT3 SLIRP_SLIRP   | 1  | 6   | -1.75548 | 0  | 2   | -2.19086  |
| sp Q14764 MVP_HMVP      | 19 | 29  | -1.75634 | 1  | 5   | -2.02963  |
| sp Q6Y1H2 HACD2_PTPLB   | 0  | 3   | -1.76263 | 0  | 2   | -1.09793  |
| sp Q13084 RM28_MRPL28   | 1  | 5   | -1.76631 | 2  | 3   | -1.68441  |
| sp Q56VL3 OCAD2_OCIAD2  | 2  | 4   | -1.76906 | 2  | 2   | -2.14352  |



|                         |    |    |          |    |    |           |
|-------------------------|----|----|----------|----|----|-----------|
| sp Q6NZI2 PTRF_HPTRF    | 13 | 44 | -1.76949 | 9  | 37 | -1.61817  |
| sp O43615 TIM44_TIMM44  | 10 | 25 | -1.77306 | 6  | 9  | -1.67154  |
| sp P08559-4 ODPAPDHA1   | 11 | 16 | -1.77632 | 1  | 4  | -1.83449  |
| sp Q8N5N7 RM50_MRPL50   | 5  | 3  | -1.77759 | 0  | 1  | -1.83284  |
| sp Q96TC7 RMD3_RMDN3    | 1  | 3  | -1.78103 | 1  | 1  | -1.45039  |
| sp P61604 CH10_FHSPE1   | 23 | 64 | -1.78294 | 16 | 43 | -1.90212  |
| sp P55809 SCOT1_OXCT1   | 30 | 50 | -1.78536 | 16 | 21 | -1.21144  |
| sp Q96I99 SUCB2_SUCLG2  | 16 | 33 | -1.78721 | 9  | 9  | -1.5992   |
| sp Q9NR28 DBLOHDIABLO   | 5  | 9  | -1.7924  | 2  | 4  | 0         |
| sp P33316 DUT_HIDUT     | 3  | 6  | -1.79527 | 4  | 5  | -1.94049  |
| sp P30837 AL1B1_ALDH1B1 | 14 | 36 | -1.79688 | 14 | 18 | -2.02618  |
| sp Q9NQ50 RM40_MRPL40   | 4  | 6  | -1.80254 | 0  | 1  | -1.41477  |
| sp P09001 RM03_IMRPL3   | 10 | 12 | -1.80593 | 3  | 4  | -1.446    |
| sp Q7L0Y3 MRRP1_TRMT10C | 9  | 20 | -1.80629 | 1  | 6  | -1.87187  |
| sp O94925-3 GLSK_GLS    | 1  | 2  | -1.80658 | 1  | 1  | -1.66092  |
| sp Q9Y4D1 DAAM:DAAM1    | 3  | 18 | -1.80677 | 0  | 4  | 1.50253   |
| sp Q9Y2D4 EXC6B_EXOC6B  | 0  | 4  | -1.80933 | 0  | 1  | -1.34659  |
| sp Q9UHQ9 NB5R1CYB5R1   | 9  | 27 | -1.80963 | 3  | 3  | -1.58121  |
| sp P48047 ATPO_FATP50   | 7  | 20 | -1.81247 | 7  | 16 | -1.97162  |
| tr HOY5C6 HOY5C6_FLNA   | 3  | 10 | -1.81476 | 2  | 3  | -1.8312   |
| sp P52815 RM12_IMRPL12  | 11 | 16 | -1.82027 | 9  | 9  | -1.79098  |
| sp Q96EY7 PTCD3_PTCD3   | 3  | 7  | -1.82246 | 2  | 3  | -1.43904  |
| sp Q9HBI1 PARVB_PARVB   | 2  | 9  | -1.82323 | 0  | 3  | -1.50328  |
| sp O75880 SCO1_FSCO1    | 1  | 6  | -1.82379 | 3  | 2  | -1.71804  |
| sp Q9Y512 SAM50_SAMM50  | 6  | 6  | -1.8277  | 0  | 5  | -2.4856   |
| sp Q9NP92 RT30_IMRPS30  | 2  | 9  | -1.83195 | 0  | 2  | -1.93603  |
| sp Q9BYC8 RM32_MRPL32   | 3  | 4  | -1.83451 | 0  | 4  | -1.44387  |
| sp Q96A35 RM24_MRPL24   | 4  | 6  | -1.83563 | 0  | 3  | -1.54433  |
| sp Q16891 IMMT_IMMT     | 54 | 62 | -1.83628 | 15 | 31 | -1.73158  |
| sp O75746 CMC1_SLC25A12 | 5  | 13 | -1.83761 | 0  | 6  | -1.65321  |
| sp Q7Z2W9 RM21_MRPL21   | 4  | 5  | -1.8425  | 2  | 2  | -1.67748  |
| sp Q9NS69 TOM22TOMM22   | 3  | 8  | -1.84842 | 1  | 4  | -1.18826  |
| sp Q9HC36 RMTL1_RNMTL1  | 0  | 1  | -1.85192 | 0  | 1  | -1.50939  |
| sp P82675 RT05_HMRPS5   | 2  | 6  | -1.85305 | 1  | 2  | -0.936908 |
| sp Q16134 ETFD_FETFDH   | 0  | 3  | -1.86555 | 0  | 1  | -1.18586  |
| sp Q03135 CAV1_FCAV1    | 12 | 52 | -1.86982 | 3  | 23 | -1.78579  |
| sp Q96DV4 RM38_MRPL38   | 0  | 2  | -1.87307 | 1  | 1  | -1.75514  |
| tr E9PIE4 E9PIE4_FMTCH2 | 2  | 1  | -1.87757 | 0  | 1  | -1.6555   |
| sp Q53H12 AGK_HAGK      | 5  | 12 | -1.87962 | 2  | 2  | -1.76054  |
| sp Q9BSH4 TACO1_TACO1   | 2  | 3  | -1.8824  | 0  | 3  | -2.69599  |
| sp Q9P2R7 SUCB1_SUCLA2  | 10 | 18 | -1.88603 | 1  | 7  | -2.2009   |
| sp O00411 RPOM_POLRMT   | 3  | 6  | -1.88606 | 1  | 3  | -2.00263  |
| sp P30084 ECHM_IECHS1   | 16 | 32 | -1.88616 | 13 | 27 | -2.09406  |
| sp P08648 ITA5_HIITGA5  | 11 | 61 | -1.89265 | 3  | 28 | -1.88708  |
| sp Q9NWU5 RM22MRPL22    | 2  | 6  | -1.89294 | 0  | 2  | -1.63014  |

|                          |    |     |          |    |    |           |
|--------------------------|----|-----|----------|----|----|-----------|
| sp Q13405 RM49_MRPL49    | 4  | 8   | -1.89687 | 5  | 6  | -1.64956  |
| sp Q5T9A4 ATD3B_ATAD3B   | 10 | 22  | -1.89927 | 2  | 7  | -2.33988  |
| sp Q9UJS0-2 CMC2SLC25A13 | 10 | 17  | -1.90017 | 6  | 10 | -1.93134  |
| sp Q8IXL7 MSRB3_MS RB3   | 1  | 6   | -1.90141 | 0  | 1  | -1.80687  |
| sp P60903 S10AA_S100A10  | 5  | 9   | -1.90291 | 1  | 2  | -1.97383  |
| sp Q9BVV7 TIM21_TIMM21   | 3  | 4   | -1.91218 | 1  | 1  | -2.09318  |
| sp P13598 ICAM2_ICAM2    | 0  | 2   | -1.91448 | 0  | 1  | 0.0397939 |
| sp O14548 COX7R_COX7A2L  | 6  | 13  | -1.91864 | 2  | 6  | -1.9202   |
| sp P49590 SYHM_IHARS2    | 6  | 7   | -1.92133 | 1  | 6  | -1.71977  |
| sp Q9NX20 RM16_MRPL16    | 7  | 10  | -1.92675 | 2  | 6  | -1.68946  |
| sp Q9BYN8 RT26_FMRPS26   | 2  | 3   | -1.92745 | 1  | 1  | -1.35765  |
| sp Q14197 ICT1_H ICT1    | 1  | 8   | -1.93074 | 1  | 3  | -1.69556  |
| sp A3KMH1 VWA8_VWA8      | 15 | 15  | -1.93245 | 1  | 3  | -1.04711  |
| sp Q9H4G4 GAPR1 GLIPR2   | 3  | 19  | -1.93593 | 1  | 3  | -1.90854  |
| sp Q9BQP7 MGMEMGME1      | 4  | 3   | -1.93684 | 0  | 1  | -1.92452  |
| sp Q6NUK1 SCMC1SLC25A24  | 14 | 35  | -1.93822 | 5  | 13 | -1.93715  |
| sp P23368 MAOM_ME2       | 3  | 13  | -1.94681 | 3  | 3  | -0.838448 |
| sp P17405 ASM_H'SMPD1    | 0  | 1   | -1.94938 | 0  | 1  | -1.52978  |
| sp Q96RD7 PANX1 PANX1    | 1  | 22  | -1.95236 | 0  | 17 | -1.40794  |
| sp P05166-2 PCCB_PCCB    | 4  | 7   | -1.96398 | 3  | 4  | -0.865912 |
| sp P11182 ODB2_FDBT      | 7  | 14  | -1.97249 | 3  | 3  | -1.39429  |
| sp P55084 ECHB_FHADHB    | 21 | 37  | -1.97335 | 7  | 21 | -2.08384  |
| sp P09622 DLDH_FDLD      | 16 | 33  | -1.98191 | 9  | 17 | -1.94346  |
| sp Q8N4Q1-2 MIA·CHCHD4   | 6  | 9   | -1.98383 | 4  | 4  | -1.64685  |
| sp Q15012 LAP4A_LAPTM4A  | 0  | 7   | -1.98447 | 0  | 2  | -1.70349  |
| sp Q9UGM6 SYWN WARS2     | 0  | 3   | -1.98627 | 0  | 2  | -1.00411  |
| sp P53597 SUCA_FSUCLG1   | 8  | 10  | -1.98812 | 4  | 2  | -1.49232  |
| sp P20908 CO5A1_COL5A1   | 9  | 27  | -2.00699 | 2  | 4  | -1.70928  |
| sp P40939 ECHA_FHADHA    | 33 | 101 | -2.01157 | 23 | 43 | -1.75797  |
| sp Q04721 NOTC2_NOTCH2   | 3  | 25  | -2.01952 | 0  | 8  | -1.67722  |
| sp O43854 EDIL3_EDIL3    | 12 | 65  | -2.02289 | 6  | 28 | -1.89966  |
| sp Q13418 ILK_HU ILK     | 8  | 28  | -2.03479 | 4  | 8  | -1.93142  |
| sp Q16740 CLPP_HCLPP     | 5  | 9   | -2.03555 | 3  | 3  | -1.97583  |
| sp Q9BYD6 RM01_MRPL1     | 9  | 7   | -2.03718 | 4  | 9  | -1.97004  |
| sp P50416 CPT1A_CPT1A    | 10 | 26  | -2.03831 | 0  | 8  | -2.048    |
| sp Q99757 THIOM.TXN2     | 1  | 3   | -2.04402 | 2  | 1  | -2.23002  |
| sp Q9P015 RM15_MRPL15    | 6  | 8   | -2.04739 | 5  | 2  | -2.50668  |
| sp O76031 CLPX_HCLPX     | 15 | 23  | -2.05255 | 1  | 9  | -1.80944  |
| sp Q9HAV7 GRPE1 GRPEL1   | 10 | 23  | -2.05302 | 4  | 9  | -2.07259  |
| sp P55290-4 CAD1.CDH13   | 1  | 12  | -2.05315 | 0  | 2  | -2.03972  |
| sp Q16891-2 IMM·IMMT     | 4  | 3   | -2.05357 | 5  | 3  | -1.91599  |
| sp Q9NVD7 PARVAPARVA     | 9  | 19  | -2.05723 | 0  | 15 | -1.85283  |
| sp Q9H2W6 RM46 MRPL46    | 11 | 11  | -2.06949 | 1  | 11 | -1.74069  |
| sp Q07954 LRP1_HLRP1     | 5  | 33  | -2.07716 | 1  | 8  | -2.38708  |
| sp Q9HA77 SYCM_CARS2     | 4  | 5   | -2.08056 | 2  | 4  | -1.93821  |

|                          |    |     |          |    |    |           |
|--------------------------|----|-----|----------|----|----|-----------|
| sp Q8NE86 MCU_FMCU       | 6  | 10  | -2.08139 | 2  | 1  | -2.63136  |
| sp O43837 IDH3B_IDH3B    | 5  | 9   | -2.08666 | 2  | 1  | -2.05578  |
| sp P07203 GPX1_FGPX1     | 0  | 2   | -2.09311 | 1  | 2  | -1.85787  |
| sp Q9Y2Z4 SYYM_FYARS2    | 9  | 6   | -2.09383 | 1  | 2  | -2.03817  |
| sp Q92604 LGAT1_LPGAT1   | 1  | 9   | -2.09813 | 0  | 3  | -1.52126  |
| sp Q10713 MPPA_PMPCA     | 9  | 13  | -2.10717 | 2  | 7  | -2.02175  |
| sp Q8IVS2 FABD_HMCAT     | 1  | 3   | -2.11459 | 1  | 1  | -1.82749  |
| sp Q6P587-3 FAHDFAH1     | 3  | 3   | -2.12646 | 1  | 3  | -2.13464  |
| sp Q9Y2S7 PDIP2_IPOLDIP2 | 1  | 3   | -2.13207 | 0  | 2  | -1.95     |
| sp Q9H061 T126A_TM126A   | 5  | 3   | -2.13718 | 0  | 1  | -1.95775  |
| sp Q99653 CHP1_FCHP1     | 1  | 7   | -2.16391 | 0  | 2  | -2.03067  |
| sp Q9H3K2 GHITM_GHITM    | 6  | 15  | -2.1911  | 2  | 4  | -2.49811  |
| sp Q96ND0 F210A_FAM210A  | 4  | 9   | -2.20333 | 2  | 3  | -2.11984  |
| sp Q9HD34 LYRM4_LYRM4    | 3  | 3   | -2.20428 | 2  | 1  | -2.76122  |
| sp Q8NBU5 ATAD1ATAD1     | 0  | 2   | -2.21084 | 1  | 3  | -1.71529  |
| sp Q9UHB6-4 LIM/LIMA1    | 31 | 90  | -2.22971 | 5  | 39 | -2.34349  |
| sp Q9NUJ1 ABHDAABHD10    | 4  | 10  | -2.24619 | 1  | 5  | -2.26815  |
| sp P50443 S26A2_SLC26A2  | 2  | 11  | -2.24982 | 0  | 5  | -3.21448  |
| sp Q9NTX5 ECHD1_ECHDC1   | 9  | 5   | -2.25592 | 0  | 1  | -1.97386  |
| sp Q14315 FLNC_FFLNC     | 95 | 130 | -2.27439 | 31 | 35 | -1.71174  |
| sp Q969S9 RRF2M_GFM2     | 0  | 6   | -2.28571 | 0  | 1  | -1.54033  |
| sp Q8WW59 SPRY-SPRYD4    | 3  | 6   | -2.2905  | 0  | 1  | -1.15604  |
| sp Q9BWM7 SFXN_SFXN3     | 3  | 3   | -2.30041 | 3  | 5  | -1.46847  |
| sp Q9Y6N5 SQRD_SQRDL     | 11 | 20  | -2.31412 | 5  | 10 | -2.79114  |
| sp Q5T160 SYRM_IRARS2    | 1  | 1   | -2.31713 | 0  | 1  | -1.60346  |
| sp O75439 MPPB_PMPCB     | 2  | 7   | -2.33235 | 2  | 4  | -1.88535  |
| sp Q9UMS0 NFU1_NFU1      | 3  | 7   | -2.33799 | 0  | 4  | -2.18233  |
| sp P42765 THIM_FACAA2    | 12 | 25  | -2.3388  | 6  | 21 | -2.13773  |
| sp P29317 EPHA2_EPHA2    | 6  | 45  | -2.36442 | 3  | 24 | -2.08753  |
| sp Q9NZJ7 MTCH1_MTCH1    | 9  | 14  | -2.38046 | 4  | 3  | -2.19395  |
| sp Q12884 SEPR_FFAP      | 0  | 2   | -2.3867  | 0  | 4  | -2.37618  |
| sp Q9ULG6-5 CCPCCCPG1    | 9  | 38  | -2.39184 | 1  | 15 | -2.094    |
| sp Q5JRX3-2 PREP_PITRM1  | 24 | 30  | -2.44116 | 4  | 3  | -2.13287  |
| sp Q86VP1 TAXB1_TAX1BP1  | 6  | 12  | -2.44907 | 1  | 4  | -2.61604  |
| sp Q96BW9 TAM4_TAMM41    | 2  | 7   | -2.46428 | 1  | 4  | -1.82177  |
| sp Q8IYU8 MICU2_MICU2    | 2  | 10  | -2.47363 | 0  | 4  | -2.16747  |
| sp Q9UHB6 LIMA1_LIMA1    | 2  | 7   | -2.4737  | 0  | 7  | -1.87858  |
| sp Q13501 SQSTM_SQSTM1   | 10 | 34  | -2.50207 | 6  | 26 | -2.24467  |
| sp Q15771 RAB30_RAB30    | 0  | 3   | -2.504   | 0  | 1  | -1.84343  |
| sp Q01995 TAGL_FTAGLN    | 30 | 49  | -2.50575 | 13 | 13 | -2.38633  |
| sp Q6UVK1 CSPG4_CSPG4    | 0  | 9   | -2.52166 | 0  | 1  | -2.55884  |
| sp Q86SJ2 AMGO2AMIGO2    | 1  | 7   | -2.57276 | 1  | 2  | -2.02686  |
| sp Q6P5Z2 PKN3_FPKN3     | 6  | 11  | -2.67046 | 0  | 2  | -0.712572 |
| sp O94925 GLSK_FGLS      | 16 | 25  | -2.70578 | 16 | 15 | -2.82085  |
| sp Q9UKX5-2 ITA1_ITGA11  | 7  | 47  | -2.79292 | 0  | 17 | -2.44015  |

|                          |    |    |          |   |    |           |
|--------------------------|----|----|----------|---|----|-----------|
| sp Q16363 LAMA4_LAMA4    | 1  | 7  | -2.85902 | 0 | 1  | -0.484348 |
| sp P11166 GTR1_FSLC2A1   | 13 | 45 | -2.89701 | 6 | 25 | -2.86003  |
| sp P13726 TF_HUNF3       | 0  | 15 | -2.97307 | 0 | 4  | -3.56469  |
| sp Q6PCB8 EMB_HEMB       | 0  | 8  | -3.1035  | 0 | 2  | -3.59717  |
| sp P07093-3 GDN_SERPINE2 | 5  | 30 | -3.10707 | 0 | 10 | -3.2508   |
| sp P29323 EPHB2_EPHB2    | 0  | 16 | -3.1289  | 0 | 6  | -2.38288  |
| sp Q16595 FRDA_FFXN      | 5  | 1  | -3.52173 | 1 | 1  | -1.38311  |
| sp P29320 EPHA3_EPHA3    | 0  | 8  | -3.59752 | 0 | 3  | -3.25603  |
| sp P05106 ITB3_HIITGB3   | 3  | 13 | -3.60523 | 0 | 8  | 0         |
| sp P02751-15 FINCFN1     | 10 | 36 | -3.61262 | 2 | 8  | -3.87336  |
| sp P21810 PGS1_HBGN      | 1  | 20 | -3.62788 | 0 | 2  | -3.02955  |
| sp P02452 CO1A1_COL1A1   | 5  | 16 | -3.72843 | 2 | 8  | -2.70019  |
| sp P04114 APOB_FAPOB     | 4  | 26 | -4.74689 | 0 | 17 | -4.52725  |
| sp Q06033 ITIH3_ITIH3    | 3  | 21 | -5.53719 | 0 | 10 | -5.05312  |
| sp P01023 A2MG_A2M       | 2  | 7  | -5.6549  | 0 | 3  | -4.35952  |
| sp P61916 NPC2_FNPC2     | 3  | 9  | -6.11236 | 3 | 3  | 1.31385   |
| sp P04004 VTNC_FVTN      | 2  | 6  | -7.10317 | 2 | 3  | -5.91617  |

All filters applied to 2305 protein dataset  
 16 control-enriched proteins  
 197 ΔRAP-enriched proteins  
 Data filtered based on Ex1 log<sub>2</sub>(H/L) ratio

| Protein Id             | Gene Symbol | Ex2_WCE_Peptides | Ex1_WCE_Peptides | Ex1 Peptides | Ex1_ratio_heavy_light_max | Ex 2 Peptides | Ex2_ratio_heavy_light_max_median |
|------------------------|-------------|------------------|------------------|--------------|---------------------------|---------------|----------------------------------|
| sp P05186 PPB`ALPL     |             | 0                | 20               | 52           | 3.07882                   | 6             | 2.56278                          |
| sp Q01974 ROFROR2      |             | 0                | 4                | 4            | 2.23932                   | 0             | 1.09542                          |
| sp P14384 CBPICPM      |             | 0                | 6                | 17           | 1.90352                   | 1             | 1.76738                          |
| sp Q92820 GGF`GGH      |             | 4                | 22               | 51           | 1.82502                   | 8             | 1.72739                          |
| sp P07711 CATICTSL     |             | 1                | 4                | 6            | 1.37153                   | 2             | 2.47385                          |
| sp P23381 SYW`WARS     |             | 12               | 16               | 29           | 1.29051                   | 17            | 1.18262                          |
| sp P53634 CATICTSC     |             | 3                | 7                | 16           | 1.28405                   | 5             | 1.58575                          |
| sp Q99538 LGMLGMN      |             | 0                | 3                | 11           | 1.26442                   | 1             | 1.67979                          |
| sp Q13576 IQG`IQGAP2   |             | 9                | 40               | 99           | 1.18586                   | 28            | 0.994698                         |
| sp Q9UM22 EP`EPDR1     |             | 0                | 2                | 7            | 1.18052                   | 0             | 1.07866                          |
| sp Q14643 ITPFI`TPR1   |             | 13               | 28               | 67           | 1.16182                   | 34            | 1.0311                           |
| sp P07686 HEX`HEXB     |             | 7                | 13               | 54           | 1.14952                   | 12            | 1.90771                          |
| sp O00754 MA`MAN2B1    |             | 0                | 8                | 19           | 1.11088                   | 2             | 1.05879                          |
| sp P32929 CGL`CTH      |             | 0                | 1                | 6            | 1.04015                   | 0             | 1.08189                          |
| sp P08243 ASN`ASNS     |             | 14               | 24               | 38           | 1.00694                   | 29            | 1.01084                          |
| sp P08236 BGLI`GUSB    |             | 2                | 22               | 32           | 1.003                     | 3             | 1.15144                          |
| sp O43852-4 C`CALU     |             | 2                | 3                | 7            | -0.999448                 | 3             | -1.26134                         |
| sp P50148 GNAG`NAQ     |             | 0                | 5                | 9            | -1.00202                  | 0             | -1.07954                         |
| sp P61224 RAP`RAP1B    |             | 4                | 10               | 11           | -1.00296                  | 4             | -0.990037                        |
| sp P84157 MXF`MXRA7    |             | 2                | 4                | 5            | -1.00507                  | 1             | -1.13146                         |
| sp P18031 PTN`PTPN1    |             | 3                | 13               | 22           | -1.01198                  | 8             | -1.26589                         |
| sp Q96DM3 MI`C18orf8   |             | 0                | 1                | 4            | -1.01633                  | 0             | -0.994527                        |
| sp Q9Y639 NPT`NPTN     |             | 0                | 12               | 29           | -1.01766                  | 4             | -1.32591                         |
| sp Q13464 ROC`ROCK1    |             | 1                | 23               | 67           | -1.01848                  | 19            | -1.00623                         |
| sp Q8NBX0 SCP`SCCPDH   |             | 1                | 4                | 11           | -1.02105                  | 4             | -1.37982                         |
| sp P04792 HSP`HSPB1    |             | 8                | 10               | 26           | -1.02481                  | 18            | -1.13008                         |
| sp Q9P035 HAC`PTPLAD1  |             | 2                | 7                | 27           | -1.02987                  | 13            | -1.14812                         |
| sp Q96005 CLP`CLPTM1   |             | 2                | 10               | 23           | -1.03029                  | 10            | -1.00913                         |
| sp P13674-2 P4`P4HA1   |             | 6                | 10               | 26           | -1.04077                  | 10            | -1.11411                         |
| sp P16520 GBB`GNB3     |             | 0                | 2                | 3            | -1.04221                  | 0             | -1.09995                         |
| sp Q9BYT8 NEL`NLN      |             | 1                | 3                | 19           | -1.04247                  | 13            | -1.17291                         |
| sp Q6T4R5 NH`NHS       |             | 0                | 8                | 15           | -1.04284                  | 0             | -1.31636                         |
| sp Q9UL26 RB2`RAB22A   |             | 0                | 2                | 7            | -1.06212                  | 0             | -1.08609                         |
| sp Q6DD88 ATL`ATL3     |             | 15               | 29               | 31           | -1.0638                   | 13            | -1.07766                         |
| sp O94973-2 AI`AIAP2A2 |             | 0                | 19               | 37           | -1.06945                  | 13            | -1.11992                         |
| sp Q9P2E9 RRB`RRBP1    |             | 27               | 52               | 108          | -1.07032                  | 61            | -1.05483                         |
| sp Q9P0K7-2 R`RAI14    |             | 10               | 51               | 99           | -1.07566                  | 37            | -1.02862                         |
| sp P04899 GNAG`NAI2    |             | 2                | 26               | 45           | -1.08819                  | 5             | -1.26381                         |
| sp Q9Y4G6 TLN`TLN2     |             | 13               | 28               | 87           | -1.09741                  | 26            | -1.1301                          |

|                        |    |     |     |          |    |          |
|------------------------|----|-----|-----|----------|----|----------|
| sp O75521 ECI2ECI2     | 2  | 6   | 18  | -1.09815 | 7  | -1.06227 |
| sp O75970 MPIMPDZ      | 2  | 3   | 29  | -1.1055  | 3  | -1.10623 |
| sp P26006 ITA3ITGA3    | 4  | 25  | 57  | -1.10572 | 15 | -1.21796 |
| sp P78356 PI42PIP4K2B  | 1  | 15  | 22  | -1.10655 | 2  | -1.64159 |
| sp O14974 MYfPPP1R12A  | 8  | 32  | 63  | -1.10759 | 23 | -1.58985 |
| sp Q07065 CKACKAP4     | 17 | 53  | 108 | -1.12083 | 33 | -1.09144 |
| sp P62879 GBB GNB2     | 1  | 14  | 22  | -1.12564 | 2  | -1.02884 |
| sp Q6WCQ1-2 IMPRIP     | 3  | 19  | 65  | -1.14029 | 28 | -1.04401 |
| sp P56199 ITA1ITGA1    | 1  | 47  | 125 | -1.14132 | 7  | -1.07394 |
| sp P54289 CA2 CACNA2D1 | 4  | 57  | 86  | -1.14434 | 10 | -1.18519 |
| sp Q9UHR4 BI2 BAIAP2L1 | 1  | 10  | 21  | -1.14698 | 0  | -1.06003 |
| sp Q8TED1 GPXGPX8      | 2  | 3   | 13  | -1.14726 | 7  | -1.12989 |
| sp Q9UHN6 TMTMEM2      | 0  | 3   | 20  | -1.14871 | 1  | -1.99414 |
| sp Q9BZG1 RAERAB34     | 2  | 7   | 29  | -1.15675 | 9  | -1.0028  |
| sp P48960 CD9 CD97     | 1  | 13  | 32  | -1.15912 | 3  | -1.14158 |
| sp O15460 P4HP4HA2     | 0  | 4   | 9   | -1.16012 | 5  | -1.17491 |
| sp P35232 PHB.PHB      | 3  | 6   | 19  | -1.16684 | 5  | -1.28903 |
| sp P84095 RHORHOG      | 4  | 14  | 18  | -1.17044 | 4  | -1.21658 |
| sp Q9UM00 TMTMCO1      | 1  | 3   | 10  | -1.17237 | 4  | -1.02664 |
| sp Q99808 S29.SLC29A1  | 0  | 1   | 8   | -1.17394 | 0  | -1.37192 |
| sp Q9BZF9 UACUACA      | 0  | 6   | 13  | -1.17474 | 1  | -1.57169 |
| sp Q96CW1 AP.AP2M1     | 2  | 14  | 34  | -1.17559 | 5  | -1.2274  |
| sp P05556 ITB1ITGB1    | 10 | 73  | 177 | -1.18118 | 30 | -1.22314 |
| sp Q9NXD2 MT.MTMR10    | 0  | 4   | 9   | -1.18211 | 0  | -1.58508 |
| sp P02786 TFR1TFR      | 42 | 133 | 265 | -1.18221 | 98 | -1.20127 |
| sp P23458 JAK1JAK1     | 0  | 11  | 20  | -1.18714 | 0  | -1.06106 |
| sp Q6UWP7 LC LCLAT1    | 0  | 4   | 6   | -1.18884 | 0  | -1.18884 |
| sp P10114 RAP.RAP2A    | 0  | 1   | 4   | -1.19051 | 0  | -1.19706 |
| tr E7EN19 E7ENMAP4K4   | 0  | 2   | 4   | -1.19118 | 0  | -1.06294 |
| sp Q9UBC2-2 E.EPS15L1  | 1  | 12  | 39  | -1.19148 | 18 | -1.12661 |
| sp P23634 AT2IATP2B4   | 1  | 26  | 43  | -1.1916  | 7  | -1.06093 |
| sp Q9Y4D7 PLX.PLXND1   | 0  | 12  | 45  | -1.19605 | 1  | -1.04517 |
| sp Q15147-4 PI.PLCB4   | 0  | 2   | 22  | -1.20051 | 0  | -1.23449 |
| sp Q99623 PHB.PHB2     | 4  | 5   | 16  | -1.21768 | 10 | -1.28426 |
| sp P22307 NLTISCP2     | 6  | 20  | 28  | -1.22304 | 15 | -1.28422 |
| sp P51159 RB2.RAB27A   | 2  | 4   | 10  | -1.22311 | 6  | -1.27957 |
| sp Q9UBR5 CKLCKLF      | 0  | 1   | 3   | -1.23376 | 0  | -1.17944 |
| sp P63010-2 AFAP2B1    | 12 | 60  | 106 | -1.23832 | 32 | -1.34836 |
| sp Q9H7Z7 PGEPTGES2    | 3  | 9   | 23  | -1.24033 | 11 | -1.74802 |
| sp Q8IWT6 LRCLRRC8A    | 1  | 19  | 39  | -1.24648 | 5  | -1.11878 |
| sp P60660-2 M.MYL6     | 5  | 6   | 45  | -1.24889 | 16 | -1.44672 |
| sp Q13217 DNJ.DNAJC3   | 0  | 4   | 18  | -1.25179 | 5  | -1.36234 |
| sp Q9H5I5-4 PIIPIEZO2  | 0  | 5   | 19  | -1.25202 | 2  | -1.00713 |
| sp Q13492 PIC/PICALM   | 2  | 18  | 25  | -1.25667 | 8  | -1.14923 |
| sp O00159 MY(MYO1C     | 3  | 25  | 89  | -1.26157 | 26 | -1.35134 |

|                         |     |     |     |          |     |          |
|-------------------------|-----|-----|-----|----------|-----|----------|
| tr H3BQK9 H3B MACF1     | 30  | 64  | 234 | -1.26664 | 82  | -1.19617 |
| sp P35222 CTN CTNNB1    | 6   | 24  | 40  | -1.27231 | 7   | -1.26837 |
| sp Q9H223 EHL EHD4      | 2   | 15  | 18  | -1.27637 | 8   | -1.24139 |
| sp P30405 PPIF PPIF     | 3   | 7   | 7   | -1.27916 | 4   | -1.85245 |
| sp P42892 ECE: ECE1     | 6   | 37  | 75  | -1.28515 | 14  | -1.22069 |
| sp P46821 MAFMAP1B      | 111 | 122 | 221 | -1.28725 | 140 | -1.11795 |
| sp Q9Y2Q3-2 G GSTK1     | 7   | 12  | 32  | -1.28737 | 12  | -1.38998 |
| sp O95470 SGP SGPL1     | 1   | 8   | 13  | -1.2876  | 4   | -1.27415 |
| sp Q6YHK3 CD1CD109      | 0   | 4   | 18  | -1.28773 | 0   | -1.42355 |
| sp Q9H4M9 EH EHD1       | 9   | 18  | 42  | -1.28783 | 15  | -1.17774 |
| sp P46939 UTR UTRN      | 14  | 66  | 206 | -1.28817 | 55  | -1.30451 |
| sp P53680 AP2: AP2S1    | 0   | 4   | 15  | -1.29198 | 0   | -1.2406  |
| sp O15439 MRIABCC4      | 0   | 20  | 79  | -1.30086 | 2   | -1.20061 |
| sp Q96AC1-3 FIFERMT2    | 8   | 56  | 95  | -1.30307 | 25  | -1.40391 |
| sp Q15942 ZYX_ZYX       | 16  | 21  | 45  | -1.30972 | 17  | -1.36338 |
| sp Q9Y490 TLN TLN1      | 73  | 179 | 245 | -1.311   | 116 | -1.1083  |
| sp Q9UBP9 GUIGULP1      | 0   | 8   | 25  | -1.31487 | 3   | -1.34457 |
| sp Q9BUV8-5 C C20orf24  | 0   | 1   | 5   | -1.32485 | 0   | -1.19865 |
| sp Q92930 RABRAB8B      | 0   | 1   | 13  | -1.32988 | 0   | -1.60353 |
| sp Q96DB5 RM RMDN1      | 0   | 4   | 15  | -1.33686 | 6   | -1.97483 |
| sp Q96JJ7 TMX: TMX3     | 5   | 18  | 32  | -1.33727 | 14  | -1.31655 |
| sp O75923-13 I DYSF     | 1   | 5   | 9   | -1.34234 | 3   | -1.4577  |
| sp O95782 AP2 AP2A1     | 0   | 11  | 30  | -1.35137 | 9   | -1.42212 |
| sp Q8NDI1 EHB EHP1      | 2   | 4   | 8   | -1.3537  | 3   | -1.94752 |
| sp P50454 SERI SERPINH1 | 17  | 63  | 120 | -1.36063 | 35  | -1.42473 |
| sp O15382 BCA BCAT2     | 3   | 4   | 10  | -1.36252 | 6   | -1.70117 |
| sp Q9BUR5 APC APOO      | 1   | 3   | 4   | -1.36313 | 2   | -1.28648 |
| sp O00469-2 P L PLOD2   | 7   | 31  | 77  | -1.3641  | 29  | -1.3509  |
| sp P51659-2 D H HSD17B4 | 11  | 30  | 69  | -1.3683  | 24  | -1.1924  |
| sp Q8IY22 CMI CMIIP     | 0   | 2   | 3   | -1.3795  | 1   | -1.39477 |
| sp Q8N3D4 EH: EHP1L1    | 9   | 17  | 36  | -1.384   | 7   | -1.37206 |
| sp P35221 CTN: CTNNA1   | 9   | 66  | 101 | -1.38618 | 29  | -1.48503 |
| sp Q7KYR7-1 B: BTN2A1   | 0   | 4   | 8   | -1.39192 | 0   | -1.53706 |
| sp Q9BWH2 FU FUND C2    | 0   | 1   | 6   | -1.39466 | 0   | -1.70674 |
| sp P60033 CD8 CD81      | 0   | 3   | 9   | -1.39776 | 2   | -1.19063 |
| sp P48426 PI42 PIP4K2A  | 0   | 1   | 10  | -1.40148 | 0   | -1.27605 |
| sp O00161 SNP SNAP23    | 4   | 21  | 37  | -1.4016  | 11  | -1.43881 |
| sp Q5T9L3-2 W WLS       | 0   | 2   | 8   | -1.40924 | 1   | -1.56945 |
| sp P21796 VDA VDAC1     | 39  | 110 | 127 | -1.41396 | 54  | -1.52275 |
| sp P26232 CTN: CTNNA2   | 2   | 10  | 11  | -1.41518 | 2   | -1.10971 |
| sp Q63ZY3-2 K: KANK2    | 2   | 5   | 22  | -1.41702 | 4   | -1.45231 |
| sp Q86XL3 ANK ANKLE2    | 0   | 1   | 6   | -1.42946 | 5   | -1.30149 |
| sp O00214-2 LELGALS8    | 0   | 3   | 17  | -1.43033 | 0   | -1.39372 |
| sp O60716 CTN CTNND1    | 7   | 44  | 85  | -1.44225 | 20  | -1.44417 |
| sp O14950 ML1 MYL12B    | 5   | 16  | 47  | -1.45081 | 16  | -1.47957 |

|                        |     |     |      |          |     |          |
|------------------------|-----|-----|------|----------|-----|----------|
| sp Q9NVV4 PAIFMTPAP    | 0   | 3   | 7    | -1.45391 | 2   | -1.88695 |
| sp O43570 CAHCA12      | 0   | 3   | 5    | -1.45459 | 0   | -1.45411 |
| sp P08962 CD6_CD63     | 4   | 20  | 47   | -1.45681 | 14  | -1.25284 |
| sp Q05682 CAL_CALD1    | 18  | 59  | 136  | -1.46057 | 38  | -1.44374 |
| sp Q9NXU5 ARIARL15     | 0   | 1   | 4    | -1.4617  | 0   | -1.75123 |
| sp Q9P265 DIP;DIP2B    | 3   | 10  | 27   | -1.46763 | 9   | -1.68322 |
| sp P15144 AMFANPEP     | 1   | 17  | 43   | -1.4732  | 6   | -1.26631 |
| sp Q6Y288 B3GB3GALTL   | 0   | 2   | 3    | -1.4739  | 0   | -1.6208  |
| sp Q02978 M2(SLC25A11  | 1   | 5   | 17   | -1.47423 | 3   | -1.66208 |
| sp O60313-2 OIOPA1     | 8   | 18  | 43   | -1.47593 | 30  | -1.44486 |
| sp Q8NBS9 TXN;TXNDC5   | 1   | 3   | 20   | -1.48024 | 7   | -1.59648 |
| sp P19022 CAD_CDH2     | 1   | 24  | 42   | -1.48673 | 5   | -1.63658 |
| sp Q9NZM1 M\MYOF       | 53  | 218 | 355  | -1.48721 | 98  | -1.44776 |
| sp P43121 MUC(MCAM     | 13  | 51  | 86   | -1.48814 | 20  | -1.42427 |
| sp Q99714 HCC;HSD17B10 | 1   | 4   | 7    | -1.49339 | 2   | -2.05831 |
| sp P45880-1 VICVDAC2   | 14  | 20  | 49   | -1.49802 | 24  | -1.90509 |
| sp P35579 MYH;MYH9     | 168 | 609 | 1111 | -1.51014 | 344 | -1.52418 |
| sp P27105 STOISTOM     | 1   | 19  | 47   | -1.54854 | 8   | -1.3324  |
| sp P34897 GLYISHMT2    | 5   | 13  | 31   | -1.55564 | 14  | -1.32454 |
| sp P01130 LDL;LDLR     | 1   | 6   | 16   | -1.55718 | 2   | -1.38143 |
| sp Q00325 MP(SLC25A3   | 8   | 14  | 37   | -1.57055 | 17  | -1.99059 |
| sp P35749-2 M\MYH11    | 17  | 45  | 75   | -1.5887  | 35  | -1.42487 |
| sp P51636 CAV_CAV2     | 0   | 4   | 10   | -1.59016 | 4   | -1.88042 |
| sp Q68CZ2 TEN_TNS3     | 3   | 7   | 28   | -1.60155 | 19  | -1.09197 |
| sp P61587 RNDRND3      | 0   | 1   | 8    | -1.61047 | 0   | -1.5718  |
| sp P04181 OAT_OAT      | 4   | 8   | 18   | -1.6447  | 11  | -1.45778 |
| sp P07355-2 AM;ANXA2   | 42  | 106 | 183  | -1.6454  | 61  | -1.61226 |
| sp P42704 LPP;LPPRC    | 27  | 79  | 155  | -1.64625 | 79  | -1.568   |
| sp Q9NZN4 EH;EHD2      | 3   | 23  | 41   | -1.64965 | 8   | -1.71871 |
| sp P49748-3 ACACADVL   | 11  | 20  | 43   | -1.65661 | 24  | -1.43466 |
| sp Q5M775 CY;SPECC1    | 3   | 37  | 61   | -1.65975 | 14  | -1.69475 |
| sp Q9NX40 OC;OC1AD1    | 1   | 3   | 6    | -1.66108 | 3   | -1.47418 |
| sp Q9BQ95 EC;ECSIT     | 0   | 1   | 3    | -1.66193 | 2   | -1.29809 |
| sp O94826 TON;TOMM70A  | 0   | 4   | 23   | -1.67249 | 6   | -1.64702 |
| sp P00367 DHE_GLUD1    | 8   | 24  | 36   | -1.68863 | 18  | -1.88011 |
| sp Q8TCS8 PNP;PNPT1    | 8   | 17  | 43   | -1.68904 | 13  | -1.51005 |
| sp Q15404 RSU;RSU1     | 3   | 12  | 28   | -1.69768 | 13  | -1.92314 |
| sp Q969G5 PRC;PRK;CDBP | 0   | 5   | 7    | -1.69807 | 4   | -2.15945 |
| sp Q6EMK4 VA;VASN      | 0   | 3   | 11   | -1.69952 | 2   | -1.69891 |
| sp Q6YN16 HSC;HSDL2    | 7   | 22  | 31   | -1.74121 | 14  | -1.55978 |
| sp Q14764 M;VIMVP      | 1   | 5   | 29   | -1.75634 | 19  | -2.02963 |
| sp Q6Y1H2 HA;CPTPLB    | 0   | 2   | 3    | -1.76263 | 0   | -1.09793 |
| sp Q6NZI2 PTR;PTRF     | 9   | 37  | 44   | -1.76949 | 13  | -1.61817 |
| sp P61604 CH1;HSPE1    | 16  | 43  | 64   | -1.78294 | 23  | -1.90212 |
| tr H0Y5C6 H0Y;FLNA     | 2   | 3   | 10   | -1.81476 | 3   | -1.8312  |



|                        |    |    |     |          |    |          |
|------------------------|----|----|-----|----------|----|----------|
| sp Q9HBI1 PAR PARVB    | 0  | 3  | 9   | -1.82323 | 2  | -1.50328 |
| sp Q03135 CAVCAV1      | 3  | 23 | 52  | -1.86982 | 12 | -1.78579 |
| sp P08648 ITA5ITGA5    | 3  | 28 | 61  | -1.89265 | 11 | -1.88708 |
| sp Q5T9A4 ATCATAD3B    | 2  | 7  | 22  | -1.89927 | 10 | -2.33988 |
| sp Q9UJS0-2 CNSLC25A13 | 6  | 10 | 17  | -1.90017 | 10 | -1.93134 |
| sp Q8IXL7 MSR MSRB3    | 0  | 1  | 6   | -1.90141 | 1  | -1.80687 |
| sp Q9H4G4 GAIGLIPR2    | 1  | 3  | 19  | -1.93593 | 3  | -1.90854 |
| sp Q96RD7 PAN PANX1    | 0  | 17 | 22  | -1.95236 | 1  | -1.40794 |
| sp P55084 ECH HADHB    | 7  | 21 | 37  | -1.97335 | 21 | -2.08384 |
| sp P09622 DLD DLD      | 9  | 17 | 33  | -1.98191 | 16 | -1.94346 |
| sp Q15012 LAP LAPTMA4  | 0  | 2  | 7   | -1.98447 | 0  | -1.70349 |
| sp Q04721 NOTNOTCH2    | 0  | 8  | 25  | -2.01952 | 3  | -1.67722 |
| sp Q13418 ILK_ILK      | 4  | 8  | 28  | -2.03479 | 8  | -1.93142 |
| sp P50416 CPT:CPT1A    | 0  | 8  | 26  | -2.03831 | 10 | -2.048   |
| sp P55290-4 CACDH13    | 0  | 2  | 12  | -2.05315 | 1  | -2.03972 |
| sp Q9NVD7 PAIPARVA     | 0  | 15 | 19  | -2.05723 | 9  | -1.85283 |
| sp Q07954 LRP LRP1     | 1  | 8  | 33  | -2.07716 | 5  | -2.38708 |
| sp Q92604 LGA LPGAT1   | 0  | 3  | 9   | -2.09813 | 1  | -1.52126 |
| sp Q9Y2S7 PDIFPOLDIP2  | 0  | 2  | 3   | -2.13207 | 1  | -1.95    |
| sp Q99653 CHP CHP1     | 0  | 2  | 7   | -2.16391 | 1  | -2.03067 |
| sp Q9UHB6-4 L LIMA1    | 5  | 39 | 90  | -2.22971 | 31 | -2.34349 |
| sp Q9NUJ1 AB+ ABHD10   | 1  | 5  | 10  | -2.24619 | 4  | -2.26815 |
| sp P50443 S26/SLC26A2  | 0  | 5  | 11  | -2.24982 | 2  | -3.21448 |
| sp Q14315 FLN FLNC     | 31 | 35 | 130 | -2.27439 | 95 | -1.71174 |
| sp Q8WW59 SFSPRYD4     | 0  | 1  | 6   | -2.2905  | 3  | -1.15604 |
| sp P29317 EPH.EPHA2    | 3  | 24 | 45  | -2.36442 | 6  | -2.08753 |
| sp Q9ULG6-5 C CCPG1    | 1  | 15 | 38  | -2.39184 | 9  | -2.094   |
| sp Q86VP1 TAXTAX1BP1   | 1  | 4  | 12  | -2.44907 | 6  | -2.61604 |
| sp Q9UHB6 LIM LIMA1    | 0  | 7  | 7   | -2.4737  | 2  | -1.87858 |
| sp Q13501 SQSSQSTM1    | 6  | 26 | 34  | -2.50207 | 10 | -2.24467 |
| sp Q15771 RABRAB30     | 0  | 1  | 3   | -2.504   | 0  | -1.84343 |
| sp Q6UVK1 CSFCSPG4     | 0  | 1  | 9   | -2.52166 | 0  | -2.55884 |
| sp Q9UKX5-2 ITITGA11   | 0  | 17 | 47  | -2.79292 | 7  | -2.44015 |
| sp P11166 GTR SLC2A1   | 6  | 25 | 45  | -2.89701 | 13 | -2.86003 |
| sp P29323 EPH.EPHB2    | 0  | 6  | 16  | -3.1289  | 0  | -2.38288 |
| sp P29320 EPH.EPHA3    | 0  | 3  | 8   | -3.59752 | 0  | -3.25603 |
| sp P02751-15 FFN1      | 2  | 8  | 36  | -3.61262 | 10 | -3.87336 |
| sp P02452 CO1 COL1A1   | 2  | 8  | 16  | -3.72843 | 5  | -2.70019 |
| sp P04114 APO APOB     | 0  | 17 | 26  | -4.74689 | 4  | -4.52725 |

| GeneID | Symbol         | Database ID                              | Ave.APSM | S <sup>N</sup> _Score | WS <sup>N</sup> _Score | D <sup>N</sup> _Score | WD <sup>N</sup> _Score | Z_score |
|--------|----------------|------------------------------------------|----------|-----------------------|------------------------|-----------------------|------------------------|---------|
| 1      | 29919 C18orf8  | <a href="#">sp Q96DM3 MIC1_HUMAN</a>     | 161      | 10.74                 | 10.36                  | 17.94                 | 17.83                  | 7.42    |
| 2      | 51622 CCZ1     | <a href="#">sp P86790 CCZ1L_HUMAN</a>    | 16       | 3.39                  | 3.26                   | 5.66                  | 5.62                   | 7.42    |
| 3      | 22879 MON1B    | <a href="#">sp Q7L1V2 MON1B_HUMAN</a>    | 15       | 3.28                  | 3.16                   | 5.48                  | 5.44                   | 7.41    |
| 4      | 84315 MON1A    | <a href="#">sp Q86VX9 MON1A_HUMAN</a>    | 9        | 2.54                  | 2.45                   | 4.24                  | 4.21                   | 7.43    |
| 5      | 90293 KLHL13   | <a href="#">sp Q9P2N7-2 KLHL13_HUMAN</a> | 4        | 1.69                  | 1.63                   | 2.83                  | 2.81                   | 7.42    |
| 6      | 55958 KLHL9    | <a href="#">sp Q9P2J3 KLHL9_HUMAN</a>    | 4        | 1.69                  | 1.63                   | 2.83                  | 2.81                   | 7.42    |
| 7      | 2744 GLS       | <a href="#">sp O94925-3 GLSK_HUMAN</a>   | 2        | 1.2                   | 1.15                   | 2                     | 1.99                   | 7.54    |
| 8      | 7915 ALDH5A1   | <a href="#">sp P51649 SSDH_HUMAN</a>     | 8        | 0.98                  | 0.97                   | 0.67                  | 0.7                    | 1.34    |
| 9      | 291 SLC25A4    | <a href="#">sp P12235 ADT1_HUMAN</a>     | 2        | 0.69                  | 0.67                   | 0.67                  | 0.66                   | 0.56    |
| 10     | 54931 RG9MTD1  | <a href="#">sp Q7L0Y3 MRRP1_HUMAN</a>    | 9        | 0.66                  | 0.86                   | 0.28                  | 0.52                   | 0.78    |
| 11     | 10762 NUP50    | <a href="#">sp Q9UKX7-2 NUP50_HUMAN</a>  | 1        | 0.49                  | 0.47                   | 0.47                  | 0.47                   | 4.13    |
| 12     | 28971 C11orf67 | <a href="#">sp Q9H7C9 CK067_HUMAN</a>    | 1        | 0.42                  | 0.41                   | 0.35                  | 0.35                   | 3.58    |
| 13     | 1917 EEF1A2    | <a href="#">sp Q05639 EF1A2_HUMAN</a>    | 6        | 0.62                  | 0.6                    | 0.31                  | 0.31                   | 1.45    |
| 14     | 7415 VCP       | <a href="#">sp P55072 TERA_HUMAN</a>     | 27       | 0.6                   | 0.85                   | 0.14                  | 0.29                   | -0.17   |
| 15     | 154796 AMOT    | <a href="#">sp Q4VCS5 AMOT_HUMAN</a>     | 6        | 0.6                   | 0.58                   | 0.29                  | 0.29                   | 5.86    |
| 16     | 79784 MYH14    | <a href="#">sp Q7Z406-2 MYH14_HUMAN</a>  | 3        | 0.46                  | 0.48                   | 0.24                  | 0.28                   | 1.31    |
| 17     | 26958 COPG2    | <a href="#">sp Q9UBF2 COPG2_HUMAN</a>    | 2        | 0.45                  | 0.44                   | 0.29                  | 0.28                   | 2.49    |
| 18     | 3832 KIF11     | <a href="#">sp P52732 KIF11_HUMAN</a>    | 44       | 0.91                  | 0.93                   | 0.25                  | 0.27                   | 1.34    |
| 19     | 3028 HSD17B10  | <a href="#">sp Q99714 HCD2_HUMAN</a>     | 17       | 0.61                  | 0.72                   | 0.18                  | 0.27                   | 1.9     |
| 20     | 3396 ICT1      | <a href="#">sp Q14197 ICT1_HUMAN</a>     | 3        | 0.49                  | 0.47                   | 0.27                  | 0.27                   | 2.49    |
| 21     | 64419 MTMR14   | <a href="#">sp Q8NCE2-2 MTMRE_HUMAN</a>  | 1        | 0.35                  | 0.36                   | 0.24                  | 0.27                   | 0.42    |
| 22     | 5836 PYGL      | <a href="#">sp P06737 PYGL_HUMAN</a>     | 3        | 0.46                  | 0.45                   | 0.24                  | 0.24                   | 2.74    |
| 23     | 6390 SDHB      | <a href="#">sp P21912 DHSB_HUMAN</a>     | 2        | 0.38                  | 0.39                   | 0.2                   | 0.23                   | 1.46    |
| 24     | 11051 NUDT21   | <a href="#">sp Q43809 CPSF5_HUMAN</a>    | 1        | 0.35                  | 0.33                   | 0.24                  | 0.23                   | 1.58    |
| 25     | 5636 PRPSAP2   | <a href="#">sp O60256 KPRB_HUMAN</a>     | 5        | 0.51                  | 0.49                   | 0.23                  | 0.22                   | 1.39    |
| 26     | 6389 SDHA      | <a href="#">sp P31040 DHSA_HUMAN</a>     | 3        | 0.37                  | 0.43                   | 0.15                  | 0.22                   | 1.23    |
| 27     | 5725 PTBP1     | <a href="#">sp P26599-2 PTBP1_HUMAN</a>  | 2        | 0.38                  | 0.37                   | 0.2                   | 0.2                    | 2.87    |
| 28     | 22820 COPG     | <a href="#">sp Q9Y678 COPG_HUMAN</a>     | 2        | 0.38                  | 0.37                   | 0.2                   | 0.2                    | 0.86    |
| 29     | 6428 SRSF3     | <a href="#">sp P84103 SRSF3_HUMAN</a>    | 2        | 0.38                  | 0.37                   | 0.2                   | 0.2                    | 2.85    |
| 30     | 10382 TUBB4    | <a href="#">sp P04350 TBB4_HUMAN</a>     | 16       | 0.62                  | 0.6                    | 0.19                  | 0.19                   | -0.02   |
| 31     | 26122 EPC2     | <a href="#">sp Q52LR7 EPC2_HUMAN</a>     | 1        | 0.85                  | 0.82                   | 0.19                  | 0.19                   | 7.54    |
| 32     | 5634 PRPS2     | <a href="#">sp P11908-2 PRPS2_HUMAN</a>  | 4        | 0.44                  | 0.42                   | 0.19                  | 0.19                   | 1.6     |
| 33     | 57082 CASC5    | <a href="#">sp Q8NG31-2 CASC5_HUMAN</a>  | 1        | 0.85                  | 0.82                   | 0.19                  | 0.19                   | 7.54    |
| 34     | 122060 SLAIN1  | <a href="#">sp Q8ND83-2 SLAI1_HUMAN</a>  | 1        | 0.85                  | 0.82                   | 0.19                  | 0.19                   | 7.54    |
| 35     | 203100 HTRA4   | <a href="#">sp P83105 HTRA4_HUMAN</a>    | 1        | 0.85                  | 0.82                   | 0.19                  | 0.19                   | 7.54    |

|    |        |                  |                                         |    |      |      |      |      |       |
|----|--------|------------------|-----------------------------------------|----|------|------|------|------|-------|
| 36 | 10335  | <b>MRVI1</b>     | <a href="#">sp Q9Y6F6-2 MRVI1_HUMAN</a> | 1  | 0.85 | 0.82 | 0.19 | 0.19 | 7.54  |
| 37 | 2316   | <b>FLNA</b>      | <a href="#">sp P21333-2 FLNA_HUMAN</a>  | 45 | 0.76 | 0.73 | 0.17 | 0.17 | -0.28 |
| 38 | 54442  | <b>KCTD5</b>     | <a href="#">sp Q9NXV2 KCTD5_HUMAN</a>   | 10 | 0.52 | 0.51 | 0.17 | 0.17 | 0.83  |
| 39 | 79734  | <b>KCTD17</b>    | <a href="#">sp Q8N5Z5-2 KCD17_HUMAN</a> | 8  | 0.49 | 0.47 | 0.17 | 0.17 | 0.38  |
| 40 | 10419  | <b>PRMT5</b>     | <a href="#">sp O14744 ANM5_HUMAN</a>    | 37 | 0.7  | 0.68 | 0.16 | 0.16 | -0.26 |
| 41 | 391634 | <b>HSP90AB2P</b> | <a href="#">sp Q58FF8 H90B2_HUMAN</a>   | 4  | 0.4  | 0.38 | 0.16 | 0.16 | 1.69  |
| 42 | 54466  | <b>SPIN2A</b>    | <a href="#">sp Q99865 SPI2A_HUMAN</a>   | 3  | 0.38 | 0.37 | 0.16 | 0.16 | 1.02  |
| 43 | 54953  | <b>C1orf27</b>   | <a href="#">sp Q5SWX8-2 ODR4_HUMAN</a>  | 3  | 0.38 | 0.37 | 0.16 | 0.16 | 1.86  |
| 44 | 10944  | <b>C11orf58</b>  | <a href="#">sp O00193 SMAP_HUMAN</a>    | 1  | 0.28 | 0.27 | 0.16 | 0.16 | 1.91  |
| 45 | 80349  | <b>WDR61</b>     | <a href="#">sp Q9GZS3 WDR61_HUMAN</a>   | 1  | 0.28 | 0.27 | 0.16 | 0.16 | 0.91  |
| 46 | 5631   | <b>PRPS1</b>     | <a href="#">sp P60891 PRPS1_HUMAN</a>   | 6  | 0.43 | 0.42 | 0.15 | 0.15 | 1.77  |
| 47 | 1642   | <b>DDB1</b>      | <a href="#">sp Q16531 DDB1_HUMAN</a>    | 3  | 0.24 | 0.35 | 0.07 | 0.15 | -0.21 |
| 48 | 3188   | <b>HNRNPH2</b>   | <a href="#">sp P55795 HNRH2_HUMAN</a>   | 5  | 0.41 | 0.4  | 0.15 | 0.15 | 1.69  |
| 49 | 54790  | <b>TET2</b>      | <a href="#">sp Q6N021 TET2_HUMAN</a>    | 2  | 0.33 | 0.32 | 0.15 | 0.15 | 2.26  |
| 50 | 3304   | <b>HSPA1B</b>    | <a href="#">sp P08107 HSP71_HUMAN</a>   | 33 | 0.64 | 0.62 | 0.14 | 0.14 | -0.24 |
| 51 | 3312   | <b>HSPA8</b>     | <a href="#">sp P11142 HSP7C_HUMAN</a>   | 34 | 0.65 | 0.63 | 0.14 | 0.14 | -0.04 |
| 52 | 2194   | <b>FASN</b>      | <a href="#">sp P49327 FAS_HUMAN</a>     | 15 | 0.48 | 0.51 | 0.12 | 0.14 | 1.32  |
| 53 | 84823  | <b>LMNB2</b>     | <a href="#">sp Q03252 LMNB2_HUMAN</a>   | 3  | 0.36 | 0.34 | 0.14 | 0.14 | 4.34  |
| 54 | 10808  | <b>HSPH1</b>     | <a href="#">sp Q92598-2 HS105_HUMAN</a> | 9  | 0.41 | 0.45 | 0.11 | 0.14 | 0.74  |
| 55 | 23510  | <b>KCTD2</b>     | <a href="#">sp Q14681 KCTD2_HUMAN</a>   | 6  | 0.42 | 0.41 | 0.14 | 0.14 | 1.23  |
| 56 | 11329  | <b>STK38</b>     | <a href="#">sp Q15208 STK38_HUMAN</a>   | 26 | 0.6  | 0.58 | 0.14 | 0.14 | 0.1   |
| 57 | 79596  | <b>RNF219</b>    | <a href="#">sp Q5W0B1 RN219_HUMAN</a>   | 5  | 0.4  | 0.39 | 0.14 | 0.14 | 2.5   |
| 58 | 23527  | <b>ACAP2</b>     | <a href="#">sp Q15057 ACAP2_HUMAN</a>   | 6  | 0.41 | 0.4  | 0.14 | 0.14 | 2.28  |
| 59 | 23112  | <b>TNRC6B</b>    | <a href="#">sp Q9UPQ9-1 TNR6B_HUMAN</a> | 3  | 0.36 | 0.34 | 0.14 | 0.14 | 2.62  |
| 60 | 6426   | <b>SRSF1</b>     | <a href="#">sp Q07955-2 SRSF1_HUMAN</a> | 1  | 0.26 | 0.26 | 0.13 | 0.14 | 0.47  |
| 61 | 5501   | <b>PPP1CC</b>    | <a href="#">sp P36873-2 PP1G_HUMAN</a>  | 1  | 0.19 | 0.26 | 0.07 | 0.14 | 0.03  |
| 62 | 50814  | <b>NSDHL</b>     | <a href="#">sp Q15738 NSDHL_HUMAN</a>   | 1  | 0.6  | 0.58 | 0.13 | 0.13 | 5.05  |
| 63 | 51479  | <b>ANKFY1</b>    | <a href="#">sp Q9P2R3-2 ANFY1_HUMAN</a> | 18 | 0.54 | 0.52 | 0.13 | 0.13 | 0.66  |
| 64 | 1267   | <b>CNP</b>       | <a href="#">sp P09543-2 CN37_HUMAN</a>  | 1  | 0.26 | 0.25 | 0.13 | 0.13 | 0.72  |
| 65 | 84790  | <b>TUBA1C</b>    | <a href="#">sp Q9BQE3 TBA1C_HUMAN</a>   | 16 | 0.52 | 0.5  | 0.13 | 0.13 | -0.22 |
| 66 | 55677  | <b>IWS1</b>      | <a href="#">sp Q96ST2-2 IWS1_HUMAN</a>  | 1  | 0.6  | 0.58 | 0.13 | 0.13 | 1.69  |
| 67 | 3838   | <b>KPNA2</b>     | <a href="#">sp P52292 IMA2_HUMAN</a>    | 5  | 0.39 | 0.37 | 0.13 | 0.13 | 3.58  |
| 68 | 5635   | <b>PRPSAP1</b>   | <a href="#">sp Q14558-2 KPRA_HUMAN</a>  | 2  | 0.31 | 0.3  | 0.13 | 0.13 | 0.62  |
| 69 | 1975   | <b>EIF4B</b>     | <a href="#">sp P23588 IF4B_HUMAN</a>    | 17 | 0.52 | 0.5  | 0.13 | 0.13 | 0.12  |
| 70 | 79718  | <b>TBL1XR1</b>   | <a href="#">sp Q9BZK7 TBL1R_HUMAN</a>   | 1  | 0.6  | 0.58 | 0.13 | 0.13 | 5.05  |
| 71 | 23193  | <b>GANAB</b>     | <a href="#">sp Q14697-2 GANAB_HUMAN</a> | 3  | 0.32 | 0.33 | 0.12 | 0.13 | 1.23  |
| 72 | 11215  | <b>AKAP11</b>    | <a href="#">sp Q9UKA4 AKA11_HUMAN</a>   | 1  | 0.6  | 0.58 | 0.13 | 0.13 | 5.05  |

|     |        |                 |                                         |    |      |      |      |      |       |
|-----|--------|-----------------|-----------------------------------------|----|------|------|------|------|-------|
| 73  | 23137  | <b>SMC5</b>     | <a href="#">sp Q8IY18 SMC5_HUMAN</a>    | 1  | 0.6  | 0.58 | 0.13 | 0.13 | 5.05  |
| 74  | 3305   | <b>HSPA1L</b>   | <a href="#">sp P34931 HS71L_HUMAN</a>   | 18 | 0.5  | 0.48 | 0.12 | 0.12 | -0.09 |
| 75  | 476    | <b>ATP1A1</b>   | <a href="#">sp P05023 AT1A1_HUMAN</a>   | 5  | 0.28 | 0.35 | 0.07 | 0.12 | -0.06 |
| 76  | 7184   | <b>HSP90B1</b>  | <a href="#">sp P14625 ENPL_HUMAN</a>    | 8  | 0.42 | 0.41 | 0.12 | 0.12 | 2.35  |
| 77  | 144097 | <b>C11orf84</b> | <a href="#">sp Q9BUA3 CK084_HUMAN</a>   | 17 | 0.5  | 0.48 | 0.12 | 0.12 | 0.92  |
| 78  | 5905   | <b>RANGAP1</b>  | <a href="#">sp P46060 RAGP1_HUMAN</a>   | 3  | 0.32 | 0.31 | 0.12 | 0.12 | 2.96  |
| 79  | 7203   | <b>CCT3</b>     | <a href="#">sp P49368 TCPG_HUMAN</a>    | 21 | 0.52 | 0.5  | 0.12 | 0.12 | 0.22  |
| 80  | 4627   | <b>MYH9</b>     | <a href="#">sp P35579 MYH9_HUMAN</a>    | 17 | 0.5  | 0.48 | 0.12 | 0.12 | 2.21  |
| 81  | 8241   | <b>RBM10</b>    | <a href="#">sp P98175-2 RBM10_HUMAN</a> | 17 | 0.5  | 0.48 | 0.12 | 0.12 | -0.01 |
| 82  | 3308   | <b>HSPA4</b>    | <a href="#">sp P34932 HSP74_HUMAN</a>   | 15 | 0.48 | 0.46 | 0.12 | 0.12 | 0.54  |
| 83  | 203068 | <b>TUBB</b>     | <a href="#">sp P07437 TBB5_HUMAN</a>    | 23 | 0.54 | 0.52 | 0.12 | 0.12 | -0.51 |
| 84  | 10383  | <b>TUBB2C</b>   | <a href="#">sp P68371 TBB2C_HUMAN</a>   | 17 | 0.49 | 0.48 | 0.12 | 0.12 | -0.42 |
| 85  | 6093   | <b>ROCK1</b>    | <a href="#">sp Q13464 ROCK1_HUMAN</a>   | 7  | 0.4  | 0.39 | 0.12 | 0.12 | 1.22  |
| 86  | 51593  | <b>SRRT</b>     | <a href="#">sp Q9BXP5-2 SRRT_HUMAN</a>  | 1  | 0.24 | 0.24 | 0.12 | 0.12 | 1.28  |
| 87  | 3921   | <b>RPSA</b>     | <a href="#">sp P08865 RSSA_HUMAN</a>    | 11 | 0.46 | 0.44 | 0.12 | 0.12 | 3.46  |
| 88  | 5695   | <b>PSMB7</b>    | <a href="#">sp Q99436 PSB7_HUMAN</a>    | 2  | 0.29 | 0.28 | 0.12 | 0.12 | 2.13  |
| 89  | 2017   | <b>CTTN</b>     | <a href="#">sp Q14247 SRC8_HUMAN</a>    | 1  | 0.24 | 0.24 | 0.12 | 0.12 | 1.03  |
| 90  | 10342  | <b>TFG</b>      | <a href="#">sp Q92734 TFG_HUMAN</a>     | 1  | 0.24 | 0.24 | 0.12 | 0.12 | 0.66  |
| 91  | 4172   | <b>MCM3</b>     | <a href="#">sp P25205 MCM3_HUMAN</a>    | 3  | 0.31 | 0.31 | 0.11 | 0.12 | 0.84  |
| 92  | 3309   | <b>HSPA5</b>    | <a href="#">sp P11021 GRP78_HUMAN</a>   | 19 | 0.49 | 0.48 | 0.11 | 0.11 | 0.27  |
| 93  | 47     | <b>ACLY</b>     | <a href="#">sp P53396 ACLY_HUMAN</a>    | 6  | 0.37 | 0.36 | 0.11 | 0.11 | 1.97  |
| 94  | 70     | <b>ACTC1</b>    | <a href="#">sp P68032 ACTC_HUMAN</a>    | 7  | 0.39 | 0.38 | 0.11 | 0.11 | 0.65  |
| 95  | 10694  | <b>CCT8</b>     | <a href="#">sp P50990 TCPQ_HUMAN</a>    | 20 | 0.51 | 0.49 | 0.11 | 0.11 | 0     |
| 96  | 10454  | <b>TAB1</b>     | <a href="#">sp Q15750 TAB1_HUMAN</a>    | 12 | 0.44 | 0.42 | 0.11 | 0.11 | 0.53  |
| 97  | 10575  | <b>CCT4</b>     | <a href="#">sp P50991 TCPD_HUMAN</a>    | 20 | 0.51 | 0.49 | 0.11 | 0.11 | 0.18  |
| 98  | 10376  | <b>TUBA1B</b>   | <a href="#">sp P68363 TBA1B_HUMAN</a>   | 18 | 0.49 | 0.47 | 0.11 | 0.11 | -0.43 |
| 99  | 226    | <b>ALDOA</b>    | <a href="#">sp P04075 ALDOA_HUMAN</a>   | 3  | 0.31 | 0.3  | 0.11 | 0.11 | 1.94  |
| 100 | 22948  | <b>CCT5</b>     | <a href="#">sp P48643 TCPE_HUMAN</a>    | 19 | 0.49 | 0.48 | 0.11 | 0.11 | 0.34  |
| 101 | 6520   | <b>SLC3A2</b>   | <a href="#">sp P08195-2 4F2_HUMAN</a>   | 3  | 0.31 | 0.3  | 0.11 | 0.11 | 1.51  |
| 102 | 79084  | <b>WDR77</b>    | <a href="#">sp Q9BQA1 MEP50_HUMAN</a>   | 16 | 0.47 | 0.45 | 0.11 | 0.11 | -0.27 |
| 103 | 2027   | <b>ENO3</b>     | <a href="#">sp P13929-2 ENOB_HUMAN</a>  | 2  | 0.28 | 0.27 | 0.11 | 0.11 | 1.02  |
| 104 | 23636  | <b>NUP62</b>    | <a href="#">sp P37198 NUP62_HUMAN</a>   | 1  | 0.49 | 0.47 | 0.11 | 0.11 | 0.96  |
| 105 | 7431   | <b>VIM</b>      | <a href="#">sp P08670 VIME_HUMAN</a>    | 14 | 0.46 | 0.45 | 0.11 | 0.11 | 1.91  |
| 106 | 6950   | <b>TCP1</b>     | <a href="#">sp P17987 TCPA_HUMAN</a>    | 19 | 0.49 | 0.47 | 0.11 | 0.11 | 0     |
| 107 | 10625  | <b>IVNS1ABP</b> | <a href="#">sp Q9Y6Y0 INS1BP_HUMAN</a>  | 9  | 0.4  | 0.39 | 0.11 | 0.11 | 1.17  |
| 108 | 1778   | <b>DYNC1H1</b>  | <a href="#">sp Q14204 DYHC1_HUMAN</a>   | 9  | 0.41 | 0.39 | 0.11 | 0.11 | -0.29 |
| 109 | 55749  | <b>CCAR1</b>    | <a href="#">sp Q8IX12-2 CCAR1_HUMAN</a> | 3  | 0.31 | 0.3  | 0.11 | 0.11 | 1.43  |

|     |       |                 |                                         |    |      |      |      |      |       |
|-----|-------|-----------------|-----------------------------------------|----|------|------|------|------|-------|
| 110 | 10576 | <b>CCT2</b>     | <a href="#">sp P78371 TCPB_HUMAN</a>    | 20 | 0.51 | 0.49 | 0.11 | 0.11 | 0.03  |
| 111 | 1785  | <b>DNM2</b>     | <a href="#">sp P50570-2 DYN2_HUMAN</a>  | 1  | 0.49 | 0.47 | 0.11 | 0.11 | 4.13  |
| 112 | 79077 | <b>DCTPP1</b>   | <a href="#">sp Q9H773 DCTP1_HUMAN</a>   | 1  | 0.49 | 0.47 | 0.11 | 0.11 | 4.13  |
| 113 | 79184 | <b>BRCC3</b>    | <a href="#">sp P46736-2 BRCC3_HUMAN</a> | 1  | 0.49 | 0.47 | 0.11 | 0.11 | 4.13  |
| 114 | 3310  | <b>HSPA6</b>    | <a href="#">sp P17066 HSP76_HUMAN</a>   | 13 | 0.43 | 0.41 | 0.1  | 0.1  | 0.38  |
| 115 | 2317  | <b>FLNB</b>     | <a href="#">sp O75369-2 FLNB_HUMAN</a>  | 9  | 0.38 | 0.37 | 0.1  | 0.1  | 1.22  |
| 116 | 2318  | <b>FLNC</b>     | <a href="#">sp Q14315-2 FLNC_HUMAN</a>  | 4  | 0.33 | 0.31 | 0.1  | 0.1  | 0.73  |
| 117 | 8570  | <b>KHSRP</b>    | <a href="#">sp Q92945-2 FUBP2_HUMAN</a> | 3  | 0.3  | 0.29 | 0.1  | 0.1  | 1.06  |
| 118 | 908   | <b>CCT6A</b>    | <a href="#">sp P40227 TCPZ_HUMAN</a>    | 15 | 0.44 | 0.43 | 0.1  | 0.1  | 0.29  |
| 119 | 10574 | <b>CCT7</b>     | <a href="#">sp Q99832 TCPH_HUMAN</a>    | 16 | 0.45 | 0.43 | 0.1  | 0.1  | 0     |
| 120 | 3313  | <b>HSPA9</b>    | <a href="#">sp P38646 GRP75_HUMAN</a>   | 17 | 0.47 | 0.45 | 0.1  | 0.1  | 0.19  |
| 121 | 1981  | <b>EIF4G1</b>   | <a href="#">sp Q04637-3 IF4G1_HUMAN</a> | 2  | 0.27 | 0.26 | 0.1  | 0.1  | 1.8   |
| 122 | 9967  | <b>THRAP3</b>   | <a href="#">sp Q9Y2W1 TR150_HUMAN</a>   | 11 | 0.41 | 0.39 | 0.1  | 0.1  | 0.09  |
| 123 | 3276  | <b>PRMT1</b>    | <a href="#">sp Q99873-2 ANM1_HUMAN</a>  | 5  | 0.28 | 0.32 | 0.07 | 0.1  | -0.08 |
| 124 | 9987  | <b>HNRPDL</b>   | <a href="#">sp O14979-2 HNRDL_HUMAN</a> | 1  | 0.23 | 0.22 | 0.1  | 0.1  | 0.71  |
| 125 | 4176  | <b>MCM7</b>     | <a href="#">sp P33993 MCM7_HUMAN</a>    | 3  | 0.29 | 0.28 | 0.1  | 0.1  | 2.07  |
| 126 | 5903  | <b>RANBP2</b>   | <a href="#">sp P49792 IRBP2_HUMAN</a>   | 1  | 0.23 | 0.22 | 0.1  | 0.1  | 1.36  |
| 127 | 3065  | <b>HDAC1</b>    | <a href="#">sp Q13547 HDAC1_HUMAN</a>   | 2  | 0.27 | 0.26 | 0.1  | 0.1  | 1.62  |
| 128 | 1314  | <b>COPA</b>     | <a href="#">sp P53621-2 COPA_HUMAN</a>  | 5  | 0.32 | 0.33 | 0.09 | 0.1  | 0.83  |
| 129 | 4171  | <b>MCM2</b>     | <a href="#">sp P49736 MCM2_HUMAN</a>    | 3  | 0.29 | 0.28 | 0.1  | 0.1  | 1.21  |
| 130 | 270   | <b>AMPD1</b>    | <a href="#">sp P23109 AMPD1_HUMAN</a>   | 1  | 0.42 | 0.41 | 0.09 | 0.09 | 3.58  |
| 131 | 1937  | <b>EEF1G</b>    | <a href="#">sp P26641 EF1G_HUMAN</a>    | 12 | 0.4  | 0.38 | 0.09 | 0.09 | 0.88  |
| 132 | 3326  | <b>HSP90AB1</b> | <a href="#">sp P08238 HS90B_HUMAN</a>   | 11 | 0.39 | 0.37 | 0.09 | 0.09 | 0.46  |
| 133 | 4628  | <b>MYH10</b>    | <a href="#">sp P35580-2 MYH10_HUMAN</a> | 7  | 0.35 | 0.33 | 0.09 | 0.09 | 0.98  |
| 134 | 26121 | <b>PRPF31</b>   | <a href="#">sp Q8WWY3 PRP31_HUMAN</a>   | 10 | 0.39 | 0.37 | 0.09 | 0.09 | -0.08 |
| 135 | 10927 | <b>SPIN1</b>    | <a href="#">sp Q9Y657 SPIN1_HUMAN</a>   | 9  | 0.37 | 0.36 | 0.09 | 0.09 | 0.13  |
| 136 | 83732 | <b>RIOK1</b>    | <a href="#">sp Q9BRS2 RIOK1_HUMAN</a>   | 8  | 0.36 | 0.34 | 0.09 | 0.09 | 0.06  |
| 137 | 22824 | <b>HSPA4L</b>   | <a href="#">sp O95757 HS74L_HUMAN</a>   | 4  | 0.29 | 0.29 | 0.08 | 0.09 | 0.1   |
| 138 | 4052  | <b>LTBP1</b>    | <a href="#">sp Q14766-4 LTBP1_HUMAN</a> | 6  | 0.33 | 0.32 | 0.09 | 0.09 | 1.03  |
| 139 | 84311 | <b>MRPL45</b>   | <a href="#">sp Q9BRJ2 RM45_HUMAN</a>    | 1  | 0.42 | 0.41 | 0.09 | 0.09 | 3.58  |
| 140 | 10399 | <b>GNB2L1</b>   | <a href="#">sp P63244 GBLP_HUMAN</a>    | 2  | 0.26 | 0.25 | 0.1  | 0.09 | 0.83  |
| 141 | 23012 | <b>STK38L</b>   | <a href="#">sp Q9Y2H1 ST38L_HUMAN</a>   | 10 | 0.39 | 0.38 | 0.1  | 0.09 | -0.13 |
| 142 | 11034 | <b>DSTN</b>     | <a href="#">sp P60981 DEST_HUMAN</a>    | 1  | 0.42 | 0.41 | 0.09 | 0.09 | 3.58  |
| 143 | 6874  | <b>TAF4</b>     | <a href="#">sp O00268 TAF4_HUMAN</a>    | 5  | 0.32 | 0.3  | 0.09 | 0.09 | 0.31  |
| 144 | 5436  | <b>POLR2G</b>   | <a href="#">sp P62487 RPB7_HUMAN</a>    | 1  | 0.42 | 0.41 | 0.09 | 0.09 | 1.25  |
| 145 | 372   | <b>ARCN1</b>    | <a href="#">sp P48444 COPD_HUMAN</a>    | 2  | 0.26 | 0.25 | 0.09 | 0.09 | 1.3   |
| 146 | 6218  | <b>RPS17</b>    | <a href="#">sp P08708 RS17_HUMAN</a>    | 2  | 0.26 | 0.25 | 0.1  | 0.09 | 0.97  |

|     |        |                 |                                         |    |      |      |      |      |       |
|-----|--------|-----------------|-----------------------------------------|----|------|------|------|------|-------|
| 147 | 6184   | <b>RPN1</b>     | <a href="#">sp P04843 RPN1_HUMAN</a>    | 1  | 0.18 | 0.21 | 0.07 | 0.09 | -0.02 |
| 148 | 3030   | <b>HADHA</b>    | <a href="#">sp P40939 ECHA_HUMAN</a>    | 2  | 0.25 | 0.25 | 0.09 | 0.09 | 0.36  |
| 149 | 84305  | <b>WIBG</b>     | <a href="#">sp Q9BRP8-2 WIBG_HUMAN</a>  | 1  | 0.42 | 0.41 | 0.09 | 0.09 | 3.58  |
| 150 | 2280   | <b>FKBP1A</b>   | <a href="#">sp P62942 FKB1A_HUMAN</a>   | 1  | 0.42 | 0.41 | 0.09 | 0.09 | 3.58  |
| 151 | 79672  | <b>FN3KRP</b>   | <a href="#">sp Q9HA64 KT3K_HUMAN</a>    | 1  | 0.42 | 0.41 | 0.09 | 0.09 | 3.58  |
| 152 | 487    | <b>ATP2A1</b>   | <a href="#">sp Q14983-2 AT2A1_HUMAN</a> | 1  | 0.42 | 0.41 | 0.09 | 0.09 | 3.58  |
| 153 | 5707   | <b>PSMD1</b>    | <a href="#">sp Q99460-2 PSMD1_HUMAN</a> | 7  | 0.32 | 0.31 | 0.08 | 0.08 | 1.07  |
| 154 | 3320   | <b>HSP90AA1</b> | <a href="#">sp P07900-2 HS90A_HUMAN</a> | 10 | 0.37 | 0.35 | 0.08 | 0.08 | 0.6   |
| 155 | 10155  | <b>TRIM28</b>   | <a href="#">sp Q13263-2 TIF1B_HUMAN</a> | 8  | 0.34 | 0.33 | 0.08 | 0.08 | 1.87  |
| 156 | 3848   | <b>KRT1</b>     | <a href="#">sp P04264 K2C1_HUMAN</a>    | 9  | 0.34 | 0.33 | 0.08 | 0.08 | -0.5  |
| 157 | 60     | <b>ACTB</b>     | <a href="#">sp P60709 ACTB_HUMAN</a>    | 11 | 0.38 | 0.36 | 0.08 | 0.08 | 0.45  |
| 158 | 5702   | <b>PSMC3</b>    | <a href="#">sp P17980 PRS6A_HUMAN</a>   | 8  | 0.34 | 0.33 | 0.08 | 0.08 | 2.04  |
| 159 | 821    | <b>CANX</b>     | <a href="#">sp P27824 CALX_HUMAN</a>    | 3  | 0.27 | 0.26 | 0.08 | 0.08 | 1.61  |
| 160 | 5685   | <b>PSMA4</b>    | <a href="#">sp P25789 PSA4_HUMAN</a>    | 4  | 0.28 | 0.27 | 0.08 | 0.08 | 1.52  |
| 161 | 2873   | <b>GPS1</b>     | <a href="#">sp Q13098-5 CSN1_HUMAN</a>  | 1  | 0.24 | 0.34 | 0.05 | 0.08 | 0     |
| 162 | 60488  | <b>MRPS35</b>   | <a href="#">sp P82673-2 IRT35_HUMAN</a> | 1  | 0.35 | 0.33 | 0.08 | 0.08 | 1.58  |
| 163 | 1915   | <b>EEF1A1</b>   | <a href="#">sp P68104 EF1A1_HUMAN</a>   | 11 | 0.37 | 0.36 | 0.08 | 0.08 | 0.5   |
| 164 | 8661   | <b>EIF3A</b>    | <a href="#">sp Q14152 EIF3A_HUMAN</a>   | 9  | 0.35 | 0.34 | 0.08 | 0.08 | -0.45 |
| 165 | 10243  | <b>GPHN</b>     | <a href="#">sp Q9NQX3-2 GEPH_HUMAN</a>  | 1  | 0.38 | 0.37 | 0.08 | 0.08 | 3.14  |
| 166 | 10540  | <b>DCTN2</b>    | <a href="#">sp Q13561-2 DCTN2_HUMAN</a> | 3  | 0.2  | 0.26 | 0.05 | 0.08 | -0.1  |
| 167 | 10657  | <b>KHDRBS1</b>  | <a href="#">sp Q07666-2 KHDR1_HUMAN</a> | 1  | 0.38 | 0.37 | 0.08 | 0.08 | 3.14  |
| 168 | 2023   | <b>ENO1</b>     | <a href="#">sp P06733 ENOA_HUMAN</a>    | 4  | 0.25 | 0.28 | 0.06 | 0.08 | 0.26  |
| 169 | 178    | <b>AGL</b>      | <a href="#">sp P35573 GDE_HUMAN</a>     | 10 | 0.36 | 0.34 | 0.08 | 0.08 | -0.34 |
| 170 | 9793   | <b>CKAP5</b>    | <a href="#">sp Q14008-2 CKAP5_HUMAN</a> | 4  | 0.28 | 0.27 | 0.08 | 0.08 | -0.09 |
| 171 | 10606  | <b>PAICS</b>    | <a href="#">sp P22234-2 PUR6_HUMAN</a>  | 3  | 0.26 | 0.25 | 0.08 | 0.08 | 2.69  |
| 172 | 220134 | <b>SKA1</b>     | <a href="#">sp Q96BD8 SKA1_HUMAN</a>    | 1  | 0.38 | 0.37 | 0.08 | 0.08 | 3.14  |
| 173 | 5701   | <b>PSMC2</b>    | <a href="#">sp P35998 PRS7_HUMAN</a>    | 7  | 0.32 | 0.31 | 0.08 | 0.08 | 1.42  |
| 174 | 4175   | <b>MCM6</b>     | <a href="#">sp Q14566 MCM6_HUMAN</a>    | 2  | 0.24 | 0.24 | 0.08 | 0.08 | 0.94  |
| 175 | 139324 | <b>HDX</b>      | <a href="#">sp Q7Z353-2 HDX_HUMAN</a>   | 2  | 0.24 | 0.24 | 0.08 | 0.08 | 0.78  |
| 176 | 7273   | <b>TTN</b>      | <a href="#">sp Q8WZ42-2 TITIN_HUMAN</a> | 4  | 0.28 | 0.27 | 0.08 | 0.08 | 2.72  |
| 177 | 3315   | <b>HSPB1</b>    | <a href="#">sp P04792 HSPB1_HUMAN</a>   | 1  | 0.2  | 0.19 | 0.08 | 0.08 | 0.49  |
| 178 | 65080  | <b>MRPL44</b>   | <a href="#">sp Q9H9J2 RM44_HUMAN</a>    | 1  | 0.38 | 0.37 | 0.08 | 0.08 | 3.14  |
| 179 | 400    | <b>ARL1</b>     | <a href="#">sp P40616 ARL1_HUMAN</a>    | 1  | 0.35 | 0.33 | 0.08 | 0.08 | 2.32  |
| 180 | 4144   | <b>MAT2A</b>    | <a href="#">sp P31153 METK2_HUMAN</a>   | 4  | 0.29 | 0.28 | 0.08 | 0.08 | 1.21  |
| 181 | 4522   | <b>MTHFD1</b>   | <a href="#">sp P11586 C1TC_HUMAN</a>    | 2  | 0.24 | 0.23 | 0.08 | 0.08 | 0.98  |
| 182 | 65008  | <b>MRPL1</b>    | <a href="#">sp Q9BYD6 RM01_HUMAN</a>    | 1  | 0.35 | 0.33 | 0.08 | 0.08 | 2.87  |
| 183 | 3029   | <b>HAGH</b>     | <a href="#">sp Q16775-2 GLO2_HUMAN</a>  | 1  | 0.35 | 0.33 | 0.08 | 0.08 | 0.88  |

|     |        |                |                                         |   |      |      |      |      |       |
|-----|--------|----------------|-----------------------------------------|---|------|------|------|------|-------|
| 184 | 23028  | <b>KDM1A</b>   | <a href="#">sp O60341-2 KDM1A_HUMAN</a> | 1 | 0.35 | 0.33 | 0.08 | 0.08 | 2.87  |
| 185 | 27339  | <b>PRPF19</b>  | <a href="#">sp Q9UMS4 PRP19_HUMAN</a>   | 1 | 0.38 | 0.37 | 0.08 | 0.08 | 2.47  |
| 186 | 8471   | <b>IRS4</b>    | <a href="#">sp O14654 IRS4_HUMAN</a>    | 1 | 0.21 | 0.2  | 0.08 | 0.08 | 0.11  |
| 187 | 5434   | <b>POLR2E</b>  | <a href="#">sp P19388 RPAB1_HUMAN</a>   | 1 | 0.21 | 0.2  | 0.08 | 0.08 | 1.22  |
| 188 | 64087  | <b>MCCC2</b>   | <a href="#">sp Q9HCC0-2 MCCB_HUMAN</a>  | 1 | 0.38 | 0.37 | 0.08 | 0.08 | 3.14  |
| 189 | 5694   | <b>PSMB6</b>   | <a href="#">sp P28072 PSB6_HUMAN</a>    | 1 | 0.2  | 0.19 | 0.08 | 0.08 | 0.94  |
| 190 | 10910  | <b>SUGT1</b>   | <a href="#">sp Q9Y2Z0-2 SUGT1_HUMAN</a> | 1 | 0.38 | 0.37 | 0.08 | 0.08 | 1.17  |
| 191 | 4677   | <b>NARS</b>    | <a href="#">sp O43776 SYNC_HUMAN</a>    | 1 | 0.35 | 0.33 | 0.08 | 0.08 | 1.95  |
| 192 | 124801 | <b>LSM12</b>   | <a href="#">sp Q3MHD2-2 LSM12_HUMAN</a> | 1 | 0.35 | 0.33 | 0.08 | 0.08 | 2.87  |
| 193 | 1627   | <b>DBN1</b>    | <a href="#">sp Q16643-2 DREB_HUMAN</a>  | 1 | 0.38 | 0.37 | 0.08 | 0.08 | 3.14  |
| 194 | 25929  | <b>GEMIN5</b>  | <a href="#">sp Q8TEQ6 GEMI5_HUMAN</a>   | 1 | 0.35 | 0.33 | 0.08 | 0.08 | 2.87  |
| 195 | 9276   | <b>COPB2</b>   | <a href="#">sp P35606 COPB2_HUMAN</a>   | 2 | 0.22 | 0.22 | 0.07 | 0.07 | 0.25  |
| 196 | 7284   | <b>TUFM</b>    | <a href="#">sp P49411 EFTU_HUMAN</a>    | 3 | 0.24 | 0.24 | 0.07 | 0.07 | 0.12  |
| 197 | 1213   | <b>CLTC</b>    | <a href="#">sp Q00610-2 CLH1_HUMAN</a>  | 5 | 0.28 | 0.27 | 0.07 | 0.07 | -0.29 |
| 198 | 5687   | <b>PSMA6</b>   | <a href="#">sp P60900 PSA6_HUMAN</a>    | 3 | 0.25 | 0.24 | 0.07 | 0.07 | 2.2   |
| 199 | 5706   | <b>PSMC6</b>   | <a href="#">sp P62333 PRS10_HUMAN</a>   | 6 | 0.31 | 0.3  | 0.08 | 0.07 | 2.03  |
| 200 | 1639   | <b>DCTN1</b>   | <a href="#">sp Q14203-2 DCTN1_HUMAN</a> | 4 | 0.26 | 0.25 | 0.07 | 0.07 | 0.71  |
| 201 | 498    | <b>ATP5A1</b>  | <a href="#">sp P25705 ATPA_HUMAN</a>    | 8 | 0.32 | 0.31 | 0.07 | 0.07 | 0.35  |
| 202 | 1938   | <b>EEF2</b>    | <a href="#">sp P13639 EF2_HUMAN</a>     | 5 | 0.27 | 0.26 | 0.07 | 0.07 | 0.38  |
| 203 | 8663   | <b>EIF3C</b>   | <a href="#">sp Q99613 EIF3C_HUMAN</a>   | 7 | 0.31 | 0.3  | 0.07 | 0.07 | 0.14  |
| 204 | 54726  | <b>OTUD4</b>   | <a href="#">sp Q01804-3 OTUD4_HUMAN</a> | 4 | 0.26 | 0.26 | 0.07 | 0.07 | 0.03  |
| 205 | 10480  | <b>EIF3M</b>   | <a href="#">sp Q7L2H7 EIF3M_HUMAN</a>   | 5 | 0.28 | 0.27 | 0.07 | 0.07 | 0.35  |
| 206 | 1478   | <b>CSTF2</b>   | <a href="#">sp P33240-2 CSTF2_HUMAN</a> | 1 | 0.32 | 0.31 | 0.07 | 0.07 | 2.15  |
| 207 | 29766  | <b>TMOD3</b>   | <a href="#">sp Q9NYL9 TMOD3_HUMAN</a>   | 1 | 0.19 | 0.18 | 0.07 | 0.07 | 0.85  |
| 208 | 8668   | <b>EIF3I</b>   | <a href="#">sp Q13347 EIF3I_HUMAN</a>   | 6 | 0.29 | 0.28 | 0.07 | 0.07 | 0.63  |
| 209 | 5708   | <b>PSMD2</b>   | <a href="#">sp Q13200 PSMD2_HUMAN</a>   | 4 | 0.26 | 0.25 | 0.07 | 0.07 | 0.54  |
| 210 | 5931   | <b>RBBP7</b>   | <a href="#">sp Q16576 RBBP7_HUMAN</a>   | 3 | 0.24 | 0.24 | 0.07 | 0.07 | 0.49  |
| 211 | 5718   | <b>PSMD12</b>  | <a href="#">sp O00232 PSD12_HUMAN</a>   | 6 | 0.3  | 0.29 | 0.07 | 0.07 | 1.74  |
| 212 | 1315   | <b>COPB1</b>   | <a href="#">sp P53618 COPB_HUMAN</a>    | 2 | 0.2  | 0.21 | 0.06 | 0.07 | 0.03  |
| 213 | 347688 | <b>TUBB8</b>   | <a href="#">sp Q3ZCM7 TBB8_HUMAN</a>    | 7 | 0.31 | 0.3  | 0.07 | 0.07 | -0.54 |
| 214 | 6240   | <b>RRM1</b>    | <a href="#">sp P23921 RIR1_HUMAN</a>    | 1 | 0.3  | 0.29 | 0.07 | 0.07 | 2.46  |
| 215 | 9774   | <b>BCLAF1</b>  | <a href="#">sp Q9NYF8-2 BCLF1_HUMAN</a> | 6 | 0.3  | 0.29 | 0.07 | 0.07 | -0.16 |
| 216 | 8664   | <b>EIF3D</b>   | <a href="#">sp O15371 EIF3D_HUMAN</a>   | 7 | 0.31 | 0.3  | 0.07 | 0.07 | 0.81  |
| 217 | 9958   | <b>USP15</b>   | <a href="#">sp Q9Y4E8-2 UBP15_HUMAN</a> | 4 | 0.27 | 0.26 | 0.07 | 0.07 | -0.05 |
| 218 | 6885   | <b>MAP3K7</b>  | <a href="#">sp O43318-2 IM3K7_HUMAN</a> | 4 | 0.26 | 0.25 | 0.07 | 0.07 | -0.15 |
| 219 | 3182   | <b>HNRNPAB</b> | <a href="#">sp Q99729-2 ROAA_HUMAN</a>  | 2 | 0.23 | 0.22 | 0.07 | 0.07 | 1     |
| 220 | 1207   | <b>CLNS1A</b>  | <a href="#">sp P54105 ICLN_HUMAN</a>    | 5 | 0.28 | 0.27 | 0.07 | 0.07 | -0.6  |

|     |        |                |                                         |   |      |      |      |      |       |
|-----|--------|----------------|-----------------------------------------|---|------|------|------|------|-------|
| 221 | 1936   | <b>EEF1D</b>   | <a href="#">sp P29692-2 EF1D_HUMAN</a>  | 7 | 0.3  | 0.29 | 0.07 | 0.07 | 1.71  |
| 222 | 5315   | <b>PKM2</b>    | <a href="#">tr E7EUQ8 E7EUQ8_HUMAN</a>  | 6 | 0.29 | 0.28 | 0.07 | 0.07 | -0.04 |
| 223 | 8662   | <b>EIF3B</b>   | <a href="#">sp P55884-2 EIF3B_HUMAN</a> | 7 | 0.31 | 0.3  | 0.07 | 0.07 | -0.27 |
| 224 | 10935  | <b>PRDX3</b>   | <a href="#">sp P30048 PRDX3_HUMAN</a>   | 3 | 0.26 | 0.25 | 0.07 | 0.07 | 1.14  |
| 225 | 3187   | <b>HNRNPH1</b> | <a href="#">sp P31943 HNRH1_HUMAN</a>   | 7 | 0.3  | 0.29 | 0.07 | 0.07 | 0.89  |
| 226 | 51747  | <b>LUC7L3</b>  | <a href="#">sp O95232 LC7L3_HUMAN</a>   | 1 | 0.19 | 0.19 | 0.07 | 0.07 | 0.89  |
| 227 | 10594  | <b>PRPF8</b>   | <a href="#">sp Q6P2Q9 PRP8_HUMAN</a>    | 6 | 0.3  | 0.29 | 0.07 | 0.07 | 0.5   |
| 228 | 84545  | <b>MRPL43</b>  | <a href="#">sp Q8N983-2 RM43_HUMAN</a>  | 1 | 0.32 | 0.31 | 0.07 | 0.07 | 2.67  |
| 229 | 377    | <b>ARF3</b>    | <a href="#">sp P61204 ARF3_HUMAN</a>    | 1 | 0.19 | 0.19 | 0.07 | 0.07 | 0.68  |
| 230 | 23157  | <b>6-Sep</b>   | <a href="#">sp Q14141-2 SEPT6_HUMAN</a> | 1 | 0.32 | 0.31 | 0.07 | 0.07 | 2.15  |
| 231 | 7332   | <b>UBE2L3</b>  | <a href="#">sp P68036 UB2L3_HUMAN</a>   | 1 | 0.3  | 0.29 | 0.07 | 0.07 | 2.46  |
| 232 | 5216   | <b>PFN1</b>    | <a href="#">sp P07737 PROF1_HUMAN</a>   | 2 | 0.22 | 0.21 | 0.07 | 0.07 | 0.83  |
| 233 | 6193   | <b>RPS5</b>    | <a href="#">sp P46782 RS5_HUMAN</a>     | 2 | 0.22 | 0.21 | 0.07 | 0.07 | 1.05  |
| 234 | 8826   | <b>IQGAP1</b>  | <a href="#">sp P46940 IQGA1_HUMAN</a>   | 1 | 0.32 | 0.31 | 0.07 | 0.07 | 2.15  |
| 235 | 1459   | <b>CSNK2A2</b> | <a href="#">sp P19784 CSK22_HUMAN</a>   | 1 | 0.32 | 0.31 | 0.07 | 0.07 | 1.05  |
| 236 | 6227   | <b>RPS21</b>   | <a href="#">sp P63220 RS21_HUMAN</a>    | 1 | 0.19 | 0.19 | 0.07 | 0.07 | 0.79  |
| 237 | 10273  | <b>STUB1</b>   | <a href="#">sp Q9UNE7-2 CHIP_HUMAN</a>  | 1 | 0.27 | 0.29 | 0.06 | 0.07 | 0.09  |
| 238 | 8452   | <b>CUL3</b>    | <a href="#">sp Q13618-2 CUL3_HUMAN</a>  | 1 | 0.3  | 0.3  | 0.07 | 0.07 | 0.55  |
| 239 | 5093   | <b>PCBP1</b>   | <a href="#">sp Q15365 PCBP1_HUMAN</a>   | 3 | 0.24 | 0.24 | 0.07 | 0.07 | 1.78  |
| 240 | 539    | <b>ATP5O</b>   | <a href="#">sp P48047 ATPO_HUMAN</a>    | 1 | 0.3  | 0.29 | 0.07 | 0.07 | 2.46  |
| 241 | 5494   | <b>PPM1A</b>   | <a href="#">sp P35813 PPM1A_HUMAN</a>   | 3 | 0.24 | 0.24 | 0.07 | 0.07 | -0.11 |
| 242 | 80335  | <b>WDR82</b>   | <a href="#">sp Q6UXN9 WDR82_HUMAN</a>   | 1 | 0.3  | 0.29 | 0.07 | 0.07 | 2.46  |
| 243 | 10549  | <b>PRDX4</b>   | <a href="#">sp Q13162 PRDX4_HUMAN</a>   | 2 | 0.21 | 0.2  | 0.06 | 0.06 | 0.39  |
| 244 | 5052   | <b>PRDX1</b>   | <a href="#">sp Q06830 PRDX1_HUMAN</a>   | 5 | 0.26 | 0.25 | 0.06 | 0.06 | 0.16  |
| 245 | 9126   | <b>SMC3</b>    | <a href="#">sp Q9UQE7 SMC3_HUMAN</a>    | 3 | 0.23 | 0.22 | 0.06 | 0.06 | 1.02  |
| 246 | 6188   | <b>RPS3</b>    | <a href="#">sp P23396 RS3_HUMAN</a>     | 6 | 0.28 | 0.27 | 0.06 | 0.06 | -0.1  |
| 247 | 5684   | <b>PSMA3</b>   | <a href="#">sp P25788-2 PSA3_HUMAN</a>  | 1 | 0.17 | 0.16 | 0.06 | 0.06 | 0.68  |
| 248 | 708    | <b>C1QBP</b>   | <a href="#">sp Q07021 C1QBP_HUMAN</a>   | 6 | 0.28 | 0.27 | 0.06 | 0.06 | 0.88  |
| 249 | 23451  | <b>SF3B1</b>   | <a href="#">sp O75533 SF3B1_HUMAN</a>   | 4 | 0.24 | 0.23 | 0.06 | 0.06 | 0.24  |
| 250 | 5717   | <b>PSMD11</b>  | <a href="#">sp O00231 PSD11_HUMAN</a>   | 5 | 0.27 | 0.26 | 0.06 | 0.06 | 0.45  |
| 251 | 4001   | <b>LMNB1</b>   | <a href="#">sp P20700 LMNB1_HUMAN</a>   | 3 | 0.23 | 0.23 | 0.06 | 0.06 | 0.4   |
| 252 | 8667   | <b>EIF3H</b>   | <a href="#">sp O15372 EIF3H_HUMAN</a>   | 4 | 0.26 | 0.25 | 0.06 | 0.06 | 0.44  |
| 253 | 5589   | <b>PRKCSH</b>  | <a href="#">sp P14314 GLU2B_HUMAN</a>   | 1 | 0.17 | 0.16 | 0.06 | 0.06 | 0.33  |
| 254 | 10121  | <b>ACTR1A</b>  | <a href="#">sp P61163 ACTZ_HUMAN</a>    | 2 | 0.17 | 0.21 | 0.04 | 0.06 | -0.22 |
| 255 | 117159 | <b>DCD</b>     | <a href="#">sp P81605 DCD_HUMAN</a>     | 1 | 0.28 | 0.27 | 0.06 | 0.06 | 2.27  |
| 256 | 3857   | <b>KRT9</b>    | <a href="#">sp P35527 K1C9_HUMAN</a>    | 5 | 0.27 | 0.26 | 0.06 | 0.06 | -0.35 |
| 257 | 5713   | <b>PSMD7</b>   | <a href="#">sp P51665 PSD7_HUMAN</a>    | 3 | 0.22 | 0.22 | 0.06 | 0.06 | 1.42  |



|     |       |                 |                                         |   |      |      |      |      |       |
|-----|-------|-----------------|-----------------------------------------|---|------|------|------|------|-------|
| 258 | 3329  | <b>HSPD1</b>    | <a href="#">sp P10809 CH60_HUMAN</a>    | 5 | 0.26 | 0.25 | 0.06 | 0.06 | -0.29 |
| 259 | 51520 | <b>LARS</b>     | <a href="#">sp Q9P2J5 SYLC_HUMAN</a>    | 4 | 0.25 | 0.24 | 0.06 | 0.06 | -0.24 |
| 260 | 3858  | <b>KRT10</b>    | <a href="#">sp P13645 K1C10_HUMAN</a>   | 5 | 0.26 | 0.25 | 0.06 | 0.06 | -0.59 |
| 261 | 29093 | <b>MRPL22</b>   | <a href="#">sp Q9NWU5-2 RM22_HUMAN</a>  | 1 | 0.28 | 0.27 | 0.06 | 0.06 | 1.91  |
| 262 | 51386 | <b>EIF3L</b>    | <a href="#">sp Q9Y262 EIF3L_HUMAN</a>   | 5 | 0.26 | 0.25 | 0.06 | 0.06 | -0.48 |
| 263 | 10075 | <b>HUWE1</b>    | <a href="#">sp Q7Z6Z7-2 HUWE1_HUMAN</a> | 4 | 0.25 | 0.24 | 0.06 | 0.06 | 0.45  |
| 264 | 506   | <b>ATP5B</b>    | <a href="#">sp P06576 ATPB_HUMAN</a>    | 5 | 0.26 | 0.25 | 0.06 | 0.06 | 0     |
| 265 | 5705  | <b>PSMC5</b>    | <a href="#">sp P62195 PRS8_HUMAN</a>    | 5 | 0.27 | 0.26 | 0.06 | 0.06 | 0.75  |
| 266 | 23020 | <b>SNRNP200</b> | <a href="#">sp O75643 U520_HUMAN</a>    | 5 | 0.27 | 0.26 | 0.06 | 0.06 | 0.02  |
| 267 | 9343  | <b>EFTUD2</b>   | <a href="#">sp Q15029 U5S1_HUMAN</a>    | 5 | 0.27 | 0.26 | 0.06 | 0.06 | 1.02  |
| 268 | 3190  | <b>HNRNPK</b>   | <a href="#">sp P61978-2 HNRPK_HUMAN</a> | 5 | 0.25 | 0.24 | 0.06 | 0.06 | -0.47 |
| 269 | 6742  | <b>SSBP1</b>    | <a href="#">sp Q04837 SSBP_HUMAN</a>    | 3 | 0.22 | 0.22 | 0.06 | 0.06 | 2.33  |
| 270 | 2746  | <b>GLUD1</b>    | <a href="#">sp P00367 DHE3_HUMAN</a>    | 1 | 0.28 | 0.27 | 0.06 | 0.06 | 1.91  |
| 271 | 6202  | <b>RPS8</b>     | <a href="#">sp P62241 RS8_HUMAN</a>     | 2 | 0.21 | 0.2  | 0.06 | 0.06 | 0.45  |
| 272 | 3301  | <b>DNAJA1</b>   | <a href="#">sp P31689 DNJA1_HUMAN</a>   | 3 | 0.23 | 0.22 | 0.06 | 0.06 | 0.39  |
| 273 | 4131  | <b>MAP1B</b>    | <a href="#">sp P46821 MAP1B_HUMAN</a>   | 4 | 0.24 | 0.23 | 0.06 | 0.06 | -0.68 |
| 274 | 5719  | <b>PSMD13</b>   | <a href="#">sp Q9UNM6-2 PSD13_HUMAN</a> | 3 | 0.23 | 0.22 | 0.06 | 0.06 | 1.28  |
| 275 | 10992 | <b>SF3B2</b>    | <a href="#">sp Q13435 SF3B2_HUMAN</a>   | 2 | 0.19 | 0.2  | 0.05 | 0.06 | 0.07  |
| 276 | 8607  | <b>RUVBL1</b>   | <a href="#">sp Q9Y265-2 RUVB1_HUMAN</a> | 4 | 0.26 | 0.25 | 0.06 | 0.06 | 0.76  |
| 277 | 29920 | <b>PYCR2</b>    | <a href="#">sp Q96C36 P5CR2_HUMAN</a>   | 1 | 0.27 | 0.26 | 0.06 | 0.06 | 1.16  |
| 278 | 2597  | <b>GAPDH</b>    | <a href="#">sp P04406 G3P_HUMAN</a>     | 4 | 0.25 | 0.24 | 0.06 | 0.06 | 0.77  |
| 279 | 64151 | <b>NCAPG</b>    | <a href="#">sp Q9BPX3 CND3_HUMAN</a>    | 2 | 0.22 | 0.21 | 0.06 | 0.06 | 1.11  |
| 280 | 10797 | <b>MTHFD2</b>   | <a href="#">sp P13995 MTDC_HUMAN</a>    | 1 | 0.27 | 0.26 | 0.06 | 0.06 | 1.84  |
| 281 | 989   | <b>7-Sep</b>    | <a href="#">sp Q16181-2 SEPT7_HUMAN</a> | 1 | 0.17 | 0.17 | 0.06 | 0.06 | 0.49  |
| 282 | 1973  | <b>EIF4A1</b>   | <a href="#">sp P60842 IF4A1_HUMAN</a>   | 2 | 0.21 | 0.2  | 0.06 | 0.06 | 0.47  |
| 283 | 2547  | <b>XRCC6</b>    | <a href="#">sp P12956 XRCC6_HUMAN</a>   | 2 | 0.2  | 0.2  | 0.06 | 0.06 | 0.06  |
| 284 | 1738  | <b>DLD</b>      | <a href="#">sp P09622 DLDH_HUMAN</a>    | 1 | 0.18 | 0.17 | 0.06 | 0.06 | 1.24  |
| 285 | 1933  | <b>EEF1B2</b>   | <a href="#">sp P24534 EF1B_HUMAN</a>    | 6 | 0.28 | 0.27 | 0.06 | 0.06 | 1.77  |
| 286 | 2821  | <b>GPI</b>      | <a href="#">sp P06744 G6PI_HUMAN</a>    | 1 | 0.26 | 0.25 | 0.06 | 0.06 | 0.78  |
| 287 | 4735  | <b>2-Sep</b>    | <a href="#">sp Q15019-2 SEPT2_HUMAN</a> | 2 | 0.21 | 0.2  | 0.06 | 0.06 | 0.92  |
| 288 | 6224  | <b>RPS20</b>    | <a href="#">sp P60866 RS20_HUMAN</a>    | 3 | 0.23 | 0.23 | 0.06 | 0.06 | 1.97  |
| 289 | 5034  | <b>P4HB</b>     | <a href="#">sp P07237 PDIA1_HUMAN</a>   | 1 | 0.18 | 0.28 | 0.04 | 0.06 | -0.01 |
| 290 | 3609  | <b>ILF3</b>     | <a href="#">sp Q12906-2 ILF3_HUMAN</a>  | 1 | 0.27 | 0.26 | 0.06 | 0.06 | 0.99  |
| 291 | 51253 | <b>MRPL37</b>   | <a href="#">sp Q9BZE1 RM37_HUMAN</a>    | 1 | 0.26 | 0.25 | 0.06 | 0.06 | 1.39  |
| 292 | 23269 | <b>MGA</b>      | <a href="#">sp Q8IWI9-2 MGAP_HUMAN</a>  | 2 | 0.22 | 0.21 | 0.06 | 0.06 | 0.34  |
| 293 | 6631  | <b>SNRPC</b>    | <a href="#">sp P09234 RU1C_HUMAN</a>    | 1 | 0.27 | 0.26 | 0.06 | 0.06 | 0.86  |
| 294 | 5693  | <b>PSMB5</b>    | <a href="#">sp P28074 PSB5_HUMAN</a>    | 3 | 0.23 | 0.23 | 0.06 | 0.06 | 0.97  |

|     |           |                  |                                         |   |      |      |      |      |       |
|-----|-----------|------------------|-----------------------------------------|---|------|------|------|------|-------|
| 295 | 92597     | <b>MOBKL1A</b>   | <a href="#">sp Q7L9L4 MOL1A_HUMAN</a>   | 1 | 0.18 | 0.17 | 0.06 | 0.06 | 0.89  |
| 296 | 5682      | <b>PSMA1</b>     | <a href="#">sp P25786-2 PSA1_HUMAN</a>  | 2 | 0.21 | 0.2  | 0.06 | 0.06 | 1.71  |
| 297 | 4790      | <b>NFKB1</b>     | <a href="#">sp P19838-2 NFKB1_HUMAN</a> | 1 | 0.26 | 0.25 | 0.06 | 0.06 | 1.76  |
| 298 | 55968     | <b>NSFL1C</b>    | <a href="#">sp Q9UNZ2-4 NSF1C_HUMAN</a> | 1 | 0.27 | 0.27 | 0.06 | 0.06 | 0.03  |
| 299 | 219       | <b>ALDH1B1</b>   | <a href="#">sp P30837 AL1B1_HUMAN</a>   | 1 | 0.28 | 0.27 | 0.06 | 0.06 | 1.06  |
| 300 | 2521      | <b>FUS</b>       | <a href="#">sp P35637-2 FUS_HUMAN</a>   | 3 | 0.21 | 0.21 | 0.05 | 0.05 | 0.27  |
| 301 | 3849      | <b>KRT2</b>      | <a href="#">sp P35908 K22E_HUMAN</a>    | 3 | 0.2  | 0.19 | 0.05 | 0.05 | -0.79 |
| 302 | 6204      | <b>RPS10</b>     | <a href="#">sp P46783 RS10_HUMAN</a>    | 2 | 0.19 | 0.18 | 0.05 | 0.05 | 0.86  |
| 303 | 34        | <b>ACADM</b>     | <a href="#">sp P11310-2 ACADM_HUMAN</a> | 1 | 0.23 | 0.22 | 0.05 | 0.05 | 1.02  |
| 304 | 5689      | <b>PSMB1</b>     | <a href="#">sp P20618 PSB1_HUMAN</a>    | 2 | 0.18 | 0.17 | 0.05 | 0.05 | 0.37  |
| 305 | 5709      | <b>PSMD3</b>     | <a href="#">sp O43242 PSMD3_HUMAN</a>   | 3 | 0.21 | 0.2  | 0.05 | 0.05 | 0.11  |
| 306 | 5700      | <b>PSMC1</b>     | <a href="#">sp P62191 PRS4_HUMAN</a>    | 3 | 0.22 | 0.21 | 0.05 | 0.05 | 0.41  |
| 307 | 7295      | <b>TXN</b>       | <a href="#">sp P10599 THIO_HUMAN</a>    | 4 | 0.23 | 0.22 | 0.05 | 0.05 | 0.66  |
| 308 | 4869      | <b>NPM1</b>      | <a href="#">sp P06748-2 NPM_HUMAN</a>   | 2 | 0.18 | 0.18 | 0.05 | 0.05 | 0.16  |
| 309 | 10146     | <b>G3BP1</b>     | <a href="#">sp Q13283 G3BP1_HUMAN</a>   | 1 | 0.23 | 0.23 | 0.05 | 0.05 | 1.6   |
| 310 | 2950      | <b>GSTP1</b>     | <a href="#">sp P09211 GSTP1_HUMAN</a>   | 3 | 0.22 | 0.21 | 0.05 | 0.05 | 0.14  |
| 311 | 26227     | <b>PHGDH</b>     | <a href="#">sp O43175 SERA_HUMAN</a>    | 3 | 0.21 | 0.2  | 0.05 | 0.05 | -0.08 |
| 312 | 11140     | <b>CDC37</b>     | <a href="#">sp Q16543 CDC37_HUMAN</a>   | 1 | 0.17 | 0.16 | 0.05 | 0.05 | 0.82  |
| 313 | 56886     | <b>UGGT1</b>     | <a href="#">sp Q9NYU2-2 UGGG1_HUMAN</a> | 1 | 0.22 | 0.21 | 0.05 | 0.05 | -0.11 |
| 314 | 1072      | <b>CFL1</b>      | <a href="#">sp P23528 COF1_HUMAN</a>    | 2 | 0.18 | 0.17 | 0.05 | 0.05 | 0.51  |
| 315 | 7818      | <b>DAP3</b>      | <a href="#">sp P51398 RT29_HUMAN</a>    | 1 | 0.21 | 0.2  | 0.05 | 0.05 | 0.82  |
| 316 | 27335     | <b>EIF3K</b>     | <a href="#">sp Q9UBQ5 EIF3K_HUMAN</a>   | 2 | 0.18 | 0.18 | 0.05 | 0.05 | 0.44  |
| 317 | 55352     | <b>C17orf79</b>  | <a href="#">sp Q9NQ92 COPR5_HUMAN</a>   | 2 | 0.18 | 0.18 | 0.05 | 0.05 | 0.21  |
| 318 | 7266      | <b>DNAJC7</b>    | <a href="#">sp Q99615 DNJC7_HUMAN</a>   | 1 | 0.23 | 0.23 | 0.05 | 0.05 | 0.26  |
| 319 | 5901      | <b>RAN</b>       | <a href="#">sp P62826 RAN_HUMAN</a>     | 2 | 0.18 | 0.18 | 0.05 | 0.05 | 1.07  |
| 320 | 5111      | <b>PCNA</b>      | <a href="#">sp P12004 PCNA_HUMAN</a>    | 2 | 0.2  | 0.19 | 0.05 | 0.05 | -0.12 |
| 321 | 136319    | <b>MTPN</b>      | <a href="#">sp P58546 MTPN_HUMAN</a>    | 1 | 0.23 | 0.22 | 0.05 | 0.05 | 1.54  |
| 322 | 5160      | <b>PDHA1</b>     | <a href="#">sp P08559 ODPA_HUMAN</a>    | 1 | 0.24 | 0.24 | 0.05 | 0.05 | 0.5   |
| 323 | 6628      | <b>SNRPB</b>     | <a href="#">sp P14678-2 RSMB_HUMAN</a>  | 3 | 0.21 | 0.2  | 0.05 | 0.05 | -0.24 |
| 324 | 3184      | <b>HNRNPD</b>    | <a href="#">sp Q14103-2 HNRPD_HUMAN</a> | 2 | 0.18 | 0.18 | 0.05 | 0.05 | 0.26  |
| 325 | 7086      | <b>TKT</b>       | <a href="#">sp P29401 TKT_HUMAN</a>     | 1 | 0.23 | 0.22 | 0.05 | 0.05 | 0.62  |
| 326 | 9646      | <b>CTR9</b>      | <a href="#">sp Q6PD62 CTR9_HUMAN</a>    | 1 | 0.24 | 0.24 | 0.05 | 0.05 | 0.8   |
| 327 | TPM3L_HUM | <b>TPM3L_HUM</b> | <a href="#">sp A6NL28-2 TPM3L_HUMAN</a> | 1 | 0.22 | 0.21 | 0.05 | 0.05 | 1.32  |
| 328 | 51639     | <b>SF3B14</b>    | <a href="#">sp Q9Y3B4 PM14_HUMAN</a>    | 2 | 0.19 | 0.18 | 0.05 | 0.05 | 1.54  |
| 329 | 23450     | <b>SF3B3</b>     | <a href="#">sp Q15393 SF3B3_HUMAN</a>   | 4 | 0.23 | 0.22 | 0.05 | 0.05 | -0.22 |
| 330 | 1153      | <b>CIRBP</b>     | <a href="#">sp Q14011 CIRBP_HUMAN</a>   | 2 | 0.18 | 0.17 | 0.05 | 0.05 | 0.69  |
| 331 | 54623     | <b>PAF1</b>      | <a href="#">sp Q8N7H5-2 PAF1_HUMAN</a>  | 1 | 0.19 | 0.2  | 0.04 | 0.05 | 0.29  |

|     |        |                  |                                          |   |      |      |      |      |       |
|-----|--------|------------------|------------------------------------------|---|------|------|------|------|-------|
| 332 | 3615   | <b>IMPDH2</b>    | <a href="#">sp P12268 IMDH2_HUMAN</a>    | 1 | 0.21 | 0.2  | 0.05 | 0.05 | 0.68  |
| 333 | 11316  | <b>COPE</b>      | <a href="#">sp O14579 COPE_HUMAN</a>     | 1 | 0.22 | 0.21 | 0.05 | 0.05 | 0.97  |
| 334 | 53615  | <b>MBD3</b>      | <a href="#">sp O95983-2 IMBD3_HUMAN</a>  | 1 | 0.16 | 0.15 | 0.05 | 0.05 | 0.45  |
| 335 | 8473   | <b>OGT</b>       | <a href="#">sp O15294-2 OGT1_HUMAN</a>   | 1 | 0.21 | 0.2  | 0.05 | 0.05 | 0.74  |
| 336 | 10642  | <b>IGF2BP1</b>   | <a href="#">sp Q9NZI8 IF2B1_HUMAN</a>    | 1 | 0.23 | 0.22 | 0.05 | 0.05 | 0.94  |
| 337 | 5520   | <b>PPP2R2A</b>   | <a href="#">sp P63151 2ABA_HUMAN</a>     | 1 | 0.23 | 0.22 | 0.05 | 0.05 | 1.36  |
| 338 | 5688   | <b>PSMA7</b>     | <a href="#">sp O14818 PSA7_HUMAN</a>     | 3 | 0.21 | 0.2  | 0.05 | 0.05 | 1.5   |
| 339 | 9208   | <b>LRRFIP1</b>   | <a href="#">sp Q32MZ4-2 LRRF1_HUMAN</a>  | 1 | 0.21 | 0.2  | 0.05 | 0.05 | 0.94  |
| 340 | 3837   | <b>KPNB1</b>     | <a href="#">sp Q14974 IMB1_HUMAN</a>     | 2 | 0.18 | 0.18 | 0.05 | 0.05 | 0.38  |
| 341 | 9861   | <b>PSMD6</b>     | <a href="#">sp Q15008 PSMD6_HUMAN</a>    | 2 | 0.19 | 0.18 | 0.05 | 0.05 | 0.61  |
| 342 | 10946  | <b>SF3A3</b>     | <a href="#">sp Q12874 SF3A3_HUMAN</a>    | 1 | 0.21 | 0.2  | 0.05 | 0.05 | 0.77  |
| 343 | 4666   | <b>NACA</b>      | <a href="#">sp Q13765 NACA_HUMAN</a>     | 1 | 0.21 | 0.2  | 0.05 | 0.05 | 1.33  |
| 344 | 873    | <b>CBR1</b>      | <a href="#">sp P16152 CBR1_HUMAN</a>     | 1 | 0.23 | 0.22 | 0.05 | 0.05 | 0.81  |
| 345 | 7314   | <b>UBB</b>       | <a href="#">sp P0CG47 UBB_HUMAN</a>      | 3 | 0.21 | 0.21 | 0.05 | 0.05 | 0.08  |
| 346 | 5710   | <b>PSMD4</b>     | <a href="#">sp P55036 PSMD4_HUMAN</a>    | 2 | 0.18 | 0.18 | 0.05 | 0.05 | 0.35  |
| 347 | 7407   | <b>VAR5</b>      | <a href="#">sp P26640 SYVC_HUMAN</a>     | 2 | 0.18 | 0.18 | 0.05 | 0.05 | 0.32  |
| 348 | 5805   | <b>PTS</b>       | <a href="#">sp Q03393 PTPS_HUMAN</a>     | 2 | 0.18 | 0.18 | 0.05 | 0.05 | 0.75  |
| 349 | 4085   | <b>MAD2L1</b>    | <a href="#">sp Q13257 MD2L1_HUMAN</a>    | 1 | 0.24 | 0.24 | 0.05 | 0.05 | 0.96  |
| 350 | 6434   | <b>TRA2B</b>     | <a href="#">sp P62995-3 TRA2B_HUMAN</a>  | 1 | 0.23 | 0.23 | 0.05 | 0.05 | 1.6   |
| 351 | 5516   | <b>PPP2CB</b>    | <a href="#">sp P62714 PP2AB_HUMAN</a>    | 1 | 0.23 | 0.23 | 0.05 | 0.05 | 0.75  |
| 352 | 8335   | <b>HIST1H2AB</b> | <a href="#">sp P04908 H2A1B_HUMAN</a>    | 2 | 0.19 | 0.18 | 0.05 | 0.05 | 0.59  |
| 353 | 103910 | <b>MYL12B</b>    | <a href="#">sp O14950 ML12B_HUMAN</a>    | 2 | 0.19 | 0.18 | 0.05 | 0.05 | 1.15  |
| 354 | 5162   | <b>PDHB</b>      | <a href="#">sp P11177-2 ODPB_HUMAN</a>   | 1 | 0.22 | 0.21 | 0.05 | 0.05 | 0.6   |
| 355 | 6633   | <b>SNRPD2</b>    | <a href="#">sp P62316 SMD2_HUMAN</a>     | 2 | 0.19 | 0.19 | 0.05 | 0.05 | 0.11  |
| 356 | 6234   | <b>RPS28</b>     | <a href="#">sp P62857 RS28_HUMAN</a>     | 3 | 0.21 | 0.2  | 0.05 | 0.05 | 1.92  |
| 357 | 9043   | <b>SPAG9</b>     | <a href="#">sp O60271-2 JIP4_HUMAN</a>   | 1 | 0.21 | 0.2  | 0.05 | 0.05 | 0.86  |
| 358 | 4841   | <b>NONO</b>      | <a href="#">sp Q15233 NONO_HUMAN</a>     | 2 | 0.2  | 0.19 | 0.06 | 0.05 | 1     |
| 359 | 10460  | <b>TACC3</b>     | <a href="#">sp Q9Y6A5 TACC3_HUMAN</a>    | 1 | 0.21 | 0.2  | 0.05 | 0.05 | 0.98  |
| 360 | 5691   | <b>PSMB3</b>     | <a href="#">sp P49720 PSB3_HUMAN</a>     | 2 | 0.19 | 0.18 | 0.05 | 0.05 | 1.29  |
| 361 | 10165  | <b>SLC25A13</b>  | <a href="#">sp Q9UJS0 CMC2_HUMAN</a>     | 1 | 0.21 | 0.2  | 0.05 | 0.05 | 0.23  |
| 362 | 8665   | <b>EIF3F</b>     | <a href="#">sp O00303 EIF3F_HUMAN</a>    | 3 | 0.21 | 0.2  | 0.05 | 0.05 | -0.26 |
| 363 | 1457   | <b>CSNK2A1</b>   | <a href="#">sp P68400 CSK21_HUMAN</a>    | 1 | 0.21 | 0.2  | 0.05 | 0.05 | 0.34  |
| 364 | 4361   | <b>MRE11A</b>    | <a href="#">sp P49959-2 IMRE11_HUMAN</a> | 1 | 0.21 | 0.2  | 0.05 | 0.05 | 1.6   |
| 365 | 5832   | <b>ALDH18A1</b>  | <a href="#">sp P54886-2 P5CS_HUMAN</a>   | 1 | 0.24 | 0.24 | 0.05 | 0.05 | 0.88  |
| 366 | 27336  | <b>HTATSF1</b>   | <a href="#">sp O43719 HTSF1_HUMAN</a>    | 1 | 0.16 | 0.22 | 0.04 | 0.05 | -0.07 |
| 367 | 9410   | <b>SNRNP40</b>   | <a href="#">sp Q96DI7 SNR40_HUMAN</a>    | 1 | 0.15 | 0.15 | 0.05 | 0.05 | 0.43  |
| 368 | 1854   | <b>DUT</b>       | <a href="#">sp P33316-2 DUT_HUMAN</a>    | 1 | 0.21 | 0.2  | 0.05 | 0.05 | 1.12  |

|     |       |                  |                                          |   |      |      |      |      |       |
|-----|-------|------------------|------------------------------------------|---|------|------|------|------|-------|
| 369 | 4174  | <b>MCM5</b>      | <a href="#">sp P33992 MCM5_HUMAN</a>     | 1 | 0.23 | 0.22 | 0.05 | 0.05 | 0.72  |
| 370 | 8520  | <b>HAT1</b>      | <a href="#">sp O14929-2 HAT1_HUMAN</a>   | 1 | 0.22 | 0.21 | 0.05 | 0.05 | 0.77  |
| 371 | 29074 | <b>MRPL18</b>    | <a href="#">sp Q9H0U6 RM18_HUMAN</a>     | 1 | 0.23 | 0.22 | 0.05 | 0.05 | 1.74  |
| 372 | 6185  | <b>RPN2</b>      | <a href="#">sp P04844 RPN2_HUMAN</a>     | 1 | 0.22 | 0.21 | 0.05 | 0.05 | 0.42  |
| 373 | 4000  | <b>LMNA</b>      | <a href="#">sp P02545-2 LMNA_HUMAN</a>   | 1 | 0.21 | 0.21 | 0.05 | 0.05 | 0.42  |
| 374 | 1984  | <b>EIF5A</b>     | <a href="#">sp P63241-2 EIF5A1_HUMAN</a> | 1 | 0.16 | 0.15 | 0.05 | 0.05 | 0.09  |
| 375 | 871   | <b>SERPINH1</b>  | <a href="#">sp P50454 SERPH_HUMAN</a>    | 1 | 0.21 | 0.2  | 0.05 | 0.05 | 0.31  |
| 376 | 9688  | <b>NUP93</b>     | <a href="#">sp Q8N1F7 NUP93_HUMAN</a>    | 1 | 0.22 | 0.22 | 0.05 | 0.05 | 0.32  |
| 377 | 11047 | <b>ADRM1</b>     | <a href="#">sp Q16186 ADRM1_HUMAN</a>    | 1 | 0.22 | 0.21 | 0.05 | 0.05 | 0.84  |
| 378 | 7532  | <b>YWHAG</b>     | <a href="#">sp P61981 1433G_HUMAN</a>    | 1 | 0.17 | 0.16 | 0.04 | 0.04 | 0.13  |
| 379 | 7531  | <b>YWHAE</b>     | <a href="#">sp P62258-2 1433E_HUMAN</a>  | 2 | 0.18 | 0.17 | 0.04 | 0.04 | -0.16 |
| 380 | 10131 | <b>TRAP1</b>     | <a href="#">sp Q12931 TRAP1_HUMAN</a>    | 2 | 0.16 | 0.16 | 0.04 | 0.04 | 0.23  |
| 381 | 63929 | <b>XPNPEP3</b>   | <a href="#">sp Q9NQH7-2 XPP3_HUMAN</a>   | 1 | 0.19 | 0.18 | 0.04 | 0.04 | 1.35  |
| 382 | 10801 | <b>9-Sep</b>     | <a href="#">sp Q9UHD8-2 SEPT9_HUMAN</a>  | 1 | 0.16 | 0.16 | 0.04 | 0.04 | 0.39  |
| 383 | 292   | <b>SLC25A5</b>   | <a href="#">sp P05141 ADT2_HUMAN</a>     | 2 | 0.17 | 0.16 | 0.04 | 0.04 | -0.59 |
| 384 | 9588  | <b>PRDX6</b>     | <a href="#">sp P30041 PRDX6_HUMAN</a>    | 2 | 0.17 | 0.16 | 0.04 | 0.04 | -0.29 |
| 385 | 4637  | <b>MYL6</b>      | <a href="#">sp P60660-2 MYL6_HUMAN</a>   | 1 | 0.18 | 0.18 | 0.04 | 0.04 | 0.26  |
| 386 | 7001  | <b>PRDX2</b>     | <a href="#">sp P32119 PRDX2_HUMAN</a>    | 1 | 0.2  | 0.19 | 0.04 | 0.04 | 0.42  |
| 387 | 6223  | <b>RPS19</b>     | <a href="#">sp P39019 RS19_HUMAN</a>     | 1 | 0.19 | 0.19 | 0.04 | 0.04 | 0.32  |
| 388 | 55291 | <b>PPP6R3</b>    | <a href="#">sp Q5H9R7-2 PP6R3_HUMAN</a>  | 1 | 0.18 | 0.19 | 0.04 | 0.04 | 0.12  |
| 389 | 3646  | <b>EIF3E</b>     | <a href="#">sp P60228 EIF3E_HUMAN</a>    | 2 | 0.17 | 0.16 | 0.04 | 0.04 | -0.84 |
| 390 | 4691  | <b>NCL</b>       | <a href="#">sp P19338 NUCL_HUMAN</a>     | 2 | 0.17 | 0.17 | 0.04 | 0.04 | -0.35 |
| 391 | 51726 | <b>DNAJB11</b>   | <a href="#">sp Q9UBS4 DJB11_HUMAN</a>    | 1 | 0.18 | 0.19 | 0.04 | 0.04 | 0.24  |
| 392 | 4673  | <b>NAP1L1</b>    | <a href="#">sp P55209 NP1L1_HUMAN</a>    | 2 | 0.18 | 0.17 | 0.04 | 0.04 | 0.71  |
| 393 | 4904  | <b>YBX1</b>      | <a href="#">sp P67809 YBOX1_HUMAN</a>    | 1 | 0.14 | 0.13 | 0.04 | 0.04 | -0.36 |
| 394 | 6647  | <b>SOD1</b>      | <a href="#">sp P00441 SODC_HUMAN</a>     | 1 | 0.19 | 0.19 | 0.04 | 0.04 | 0.89  |
| 395 | 4082  | <b>MARCKS</b>    | <a href="#">sp P29966 MARCS_HUMAN</a>    | 1 | 0.2  | 0.19 | 0.04 | 0.04 | 0.92  |
| 396 | 83473 | <b>KATNAL2</b>   | <a href="#">sp Q81YT4-2 KATL2_HUMAN</a>  | 1 | 0.18 | 0.18 | 0.04 | 0.04 | 0.29  |
| 397 | 81    | <b>ACTN4</b>     | <a href="#">sp O43707 ACTN4_HUMAN</a>    | 1 | 0.2  | 0.19 | 0.04 | 0.04 | 0.43  |
| 398 | 5714  | <b>PSMD8</b>     | <a href="#">sp P48556 PSMD8_HUMAN</a>    | 1 | 0.18 | 0.17 | 0.04 | 0.04 | 0.66  |
| 399 | 10521 | <b>DDX17</b>     | <a href="#">sp Q92841-2 DDX17_HUMAN</a>  | 1 | 0.18 | 0.17 | 0.04 | 0.04 | 0.18  |
| 400 | 1654  | <b>DDX3X</b>     | <a href="#">sp O00571 DDX3X_HUMAN</a>    | 2 | 0.17 | 0.17 | 0.04 | 0.04 | 0.23  |
| 401 | 3181  | <b>HNRNPA2B1</b> | <a href="#">sp P22626-2 ROA2_HUMAN</a>   | 2 | 0.17 | 0.17 | 0.04 | 0.04 | -0.07 |
| 402 | 3178  | <b>HNRNPA1</b>   | <a href="#">sp P09651-2 ROA1_HUMAN</a>   | 2 | 0.17 | 0.17 | 0.04 | 0.04 | 0.39  |
| 403 | 5202  | <b>PFDN2</b>     | <a href="#">sp Q9UHV9 PFD2_HUMAN</a>     | 1 | 0.15 | 0.16 | 0.03 | 0.04 | 0.02  |
| 404 | 6627  | <b>SNRPA1</b>    | <a href="#">sp P09661 RU2A_HUMAN</a>     | 1 | 0.14 | 0.14 | 0.04 | 0.04 | 0.23  |
| 405 | 5704  | <b>PSMC4</b>     | <a href="#">sp P43686-2 PRS6B_HUMAN</a>  | 1 | 0.16 | 0.15 | 0.04 | 0.04 | 0.23  |

|     |       |                |                                         |   |      |      |      |      |       |
|-----|-------|----------------|-----------------------------------------|---|------|------|------|------|-------|
| 406 | 6737  | <b>TRIM21</b>  | <a href="#">sp P19474 RO52_HUMAN</a>    | 2 | 0.18 | 0.17 | 0.04 | 0.04 | -0.56 |
| 407 | 7175  | <b>TPR</b>     | <a href="#">sp P12270 TPR_HUMAN</a>     | 2 | 0.18 | 0.18 | 0.04 | 0.04 | 0.18  |
| 408 | 57683 | <b>ZDBF2</b>   | <a href="#">sp Q9HCK1 ZDBF2_HUMAN</a>   | 1 | 0.2  | 0.19 | 0.04 | 0.04 | 0.38  |
| 409 | 6206  | <b>RPS12</b>   | <a href="#">sp P25398 RS12_HUMAN</a>    | 1 | 0.13 | 0.13 | 0.04 | 0.04 | -0.21 |
| 410 | 3945  | <b>LDHB</b>    | <a href="#">sp P07195 LDHB_HUMAN</a>    | 2 | 0.17 | 0.17 | 0.04 | 0.04 | 0.03  |
| 411 | 56945 | <b>MRPS22</b>  | <a href="#">sp P82650 RT22_HUMAN</a>    | 1 | 0.16 | 0.16 | 0.04 | 0.04 | 0.62  |
| 412 | 10728 | <b>PTGES3</b>  | <a href="#">sp Q15185 TEBP_HUMAN</a>    | 1 | 0.18 | 0.18 | 0.04 | 0.04 | 0.97  |
| 413 | 10294 | <b>DNAJA2</b>  | <a href="#">sp O60884 DNJA2_HUMAN</a>   | 1 | 0.14 | 0.13 | 0.04 | 0.04 | -0.37 |
| 414 | 204   | <b>AK2</b>     | <a href="#">sp P54819-2 KAD2_HUMAN</a>  | 1 | 0.17 | 0.17 | 0.04 | 0.04 | 0.72  |
| 415 | 5690  | <b>PSMB2</b>   | <a href="#">sp P49721 PSB2_HUMAN</a>    | 1 | 0.17 | 0.16 | 0.04 | 0.04 | 0.89  |
| 416 | 6632  | <b>SNRPD1</b>  | <a href="#">sp P62314 SMD1_HUMAN</a>    | 1 | 0.15 | 0.14 | 0.04 | 0.04 | -0.2  |
| 417 | 7167  | <b>TPI1</b>    | <a href="#">sp P60174-2 TPIS_HUMAN</a>  | 1 | 0.19 | 0.19 | 0.04 | 0.04 | 0.14  |
| 418 | 5033  | <b>P4HA1</b>   | <a href="#">sp P13674-2 P4HA1_HUMAN</a> | 1 | 0.18 | 0.17 | 0.04 | 0.04 | 0.59  |
| 419 | 25902 | <b>MTHFD1L</b> | <a href="#">sp Q6UB35 C1TM_HUMAN</a>    | 1 | 0.2  | 0.19 | 0.04 | 0.04 | 0.51  |
| 420 | 1476  | <b>CSTB</b>    | <a href="#">sp P04080 CYTB_HUMAN</a>    | 1 | 0.19 | 0.19 | 0.04 | 0.04 | 1.4   |
| 421 | 5902  | <b>RANBP1</b>  | <a href="#">sp P43487 IRANG_HUMAN</a>   | 1 | 0.17 | 0.16 | 0.04 | 0.04 | 0.85  |
| 422 | 10856 | <b>RUVBL2</b>  | <a href="#">sp Q9Y230 RUVB2_HUMAN</a>   | 2 | 0.17 | 0.16 | 0.04 | 0.04 | -0.21 |
| 423 | 10128 | <b>LRPPRC</b>  | <a href="#">sp P42704 LPPRC_HUMAN</a>   | 1 | 0.18 | 0.18 | 0.04 | 0.04 | 0     |
| 424 | 6921  | <b>TCEB1</b>   | <a href="#">sp Q15369 ELOC_HUMAN</a>    | 1 | 0.18 | 0.17 | 0.04 | 0.04 | 0.75  |
| 425 | 6767  | <b>ST13</b>    | <a href="#">sp P50502 F10A1_HUMAN</a>   | 1 | 0.18 | 0.17 | 0.04 | 0.04 | 0.55  |
| 426 | 55037 | <b>PTCD3</b>   | <a href="#">sp Q96EY7 PTCD3_HUMAN</a>   | 1 | 0.18 | 0.17 | 0.04 | 0.04 | 0.72  |
| 427 | 4670  | <b>HNRNPM</b>  | <a href="#">sp P52272-2 HNRPM_HUMAN</a> | 1 | 0.19 | 0.18 | 0.04 | 0.04 | 0.2   |
| 428 | 7520  | <b>XRCC5</b>   | <a href="#">sp P13010 XRCC5_HUMAN</a>   | 1 | 0.18 | 0.18 | 0.04 | 0.04 | -0.03 |
| 429 | 85313 | <b>PPIL4</b>   | <a href="#">sp Q8WUA2 PPIL4_HUMAN</a>   | 1 | 0.17 | 0.16 | 0.04 | 0.04 | 0.33  |
| 430 | 1503  | <b>CTPS</b>    | <a href="#">sp P17812 PYRG1_HUMAN</a>   | 1 | 0.2  | 0.19 | 0.04 | 0.04 | 0.15  |
| 431 | 9785  | <b>DHX38</b>   | <a href="#">sp Q92620 PRP16_HUMAN</a>   | 1 | 0.16 | 0.16 | 0.04 | 0.04 | -0.12 |
| 432 | 9128  | <b>PRPF4</b>   | <a href="#">sp O43172-2 PRP4_HUMAN</a>  | 1 | 0.18 | 0.17 | 0.04 | 0.04 | 1.09  |
| 433 | 10963 | <b>STIP1</b>   | <a href="#">sp P31948 STIP1_HUMAN</a>   | 1 | 0.2  | 0.19 | 0.04 | 0.04 | 0.28  |
| 434 | 10213 | <b>PSMD14</b>  | <a href="#">sp O00487 PSDE_HUMAN</a>    | 1 | 0.17 | 0.17 | 0.04 | 0.04 | 0.63  |
| 435 | 57606 | <b>SLAIN2</b>  | <a href="#">sp Q9P270 SLAI2_HUMAN</a>   | 1 | 0.14 | 0.14 | 0.04 | 0.04 | -0.22 |
| 436 | 5955  | <b>RCN2</b>    | <a href="#">sp Q14257 RCN2_HUMAN</a>    | 1 | 0.13 | 0.13 | 0.03 | 0.04 | -0.44 |
| 437 | 6748  | <b>SSR4</b>    | <a href="#">sp P51571 SSRD_HUMAN</a>    | 1 | 0.13 | 0.13 | 0.04 | 0.04 | -0.23 |
| 438 | 6117  | <b>RPA1</b>    | <a href="#">sp P27694 RFA1_HUMAN</a>    | 1 | 0.2  | 0.19 | 0.04 | 0.04 | 1.45  |
| 439 | 5495  | <b>PPM1B</b>   | <a href="#">sp O75688-2 PPM1B_HUMAN</a> | 2 | 0.17 | 0.17 | 0.04 | 0.04 | -0.9  |
| 440 | 85440 | <b>DOCK7</b>   | <a href="#">sp Q96N67-2 DOCK7_HUMAN</a> | 1 | 0.15 | 0.14 | 0.04 | 0.04 | -0.08 |
| 441 | 9349  | <b>RPL23</b>   | <a href="#">sp P62829 RL23_HUMAN</a>    | 2 | 0.16 | 0.16 | 0.04 | 0.04 | -0.34 |
| 442 | 6421  | <b>SFPQ</b>    | <a href="#">sp P23246-2 SFPQ_HUMAN</a>  | 2 | 0.18 | 0.17 | 0.04 | 0.04 | 0.72  |

|     |        |                  |                                         |   |      |      |      |      |       |
|-----|--------|------------------|-----------------------------------------|---|------|------|------|------|-------|
| 443 | 5518   | <b>PPP2R1A</b>   | <a href="#">sp P30153 2AAA_HUMAN</a>    | 1 | 0.17 | 0.16 | 0.04 | 0.04 | 0.27  |
| 444 | 3183   | <b>HNRNPC</b>    | <a href="#">sp P07910-2 HNRPC_HUMAN</a> | 1 | 0.19 | 0.19 | 0.04 | 0.04 | 0.1   |
| 445 | 80086  | <b>TUBA4B</b>    | <a href="#">sp Q9H853 TBA4B_HUMAN</a>   | 1 | 0.14 | 0.13 | 0.04 | 0.04 | -0.52 |
| 446 | 6191   | <b>RPS4X</b>     | <a href="#">sp P62701 RS4X_HUMAN</a>    | 1 | 0.14 | 0.13 | 0.04 | 0.04 | -0.38 |
| 447 | 6472   | <b>SHMT2</b>     | <a href="#">sp P34897 GLYM_HUMAN</a>    | 1 | 0.19 | 0.19 | 0.04 | 0.04 | 0.08  |
| 448 | 7534   | <b>YWHAZ</b>     | <a href="#">sp P63104 1433Z_HUMAN</a>   | 1 | 0.13 | 0.12 | 0.03 | 0.03 | -0.59 |
| 449 | 85236  | <b>HIST1H2BK</b> | <a href="#">sp O60814 H2B1K_HUMAN</a>   | 1 | 0.15 | 0.14 | 0.03 | 0.03 | 0.31  |
| 450 | 829    | <b>CAPZA1</b>    | <a href="#">sp P52907 CAZA1_HUMAN</a>   | 1 | 0.14 | 0.14 | 0.03 | 0.03 | -0.07 |
| 451 | 5209   | <b>PFKFB3</b>    | <a href="#">sp Q16875-2 F263_HUMAN</a>  | 1 | 0.13 | 0.13 | 0.03 | 0.03 | -0.66 |
| 452 | 9131   | <b>AIFM1</b>     | <a href="#">sp O95831-3 AIFM1_HUMAN</a> | 1 | 0.12 | 0.12 | 0.03 | 0.03 | -0.76 |
| 453 | 6745   | <b>SSR1</b>      | <a href="#">sp P43307-2 SSRA_HUMAN</a>  | 1 | 0.14 | 0.13 | 0.03 | 0.03 | 0.13  |
| 454 | 8243   | <b>SMC1A</b>     | <a href="#">sp Q14683 SMC1A_HUMAN</a>   | 1 | 0.13 | 0.12 | 0.03 | 0.03 | -0.17 |
| 455 | 3799   | <b>KIF5B</b>     | <a href="#">sp P33176 KINH_HUMAN</a>    | 1 | 0.15 | 0.15 | 0.03 | 0.03 | 0.01  |
| 456 | 10130  | <b>PDIA6</b>     | <a href="#">sp Q15084-2 PDIA6_HUMAN</a> | 1 | 0.15 | 0.14 | 0.03 | 0.03 | -0.21 |
| 457 | 3856   | <b>KRT8</b>      | <a href="#">sp P05787 K2C8_HUMAN</a>    | 1 | 0.12 | 0.12 | 0.03 | 0.03 | -0.27 |
| 458 | 220988 | <b>HNRNPA3</b>   | <a href="#">sp P51991-2 ROA3_HUMAN</a>  | 1 | 0.14 | 0.14 | 0.03 | 0.03 | 0.23  |
| 459 | 8666   | <b>EIF3G</b>     | <a href="#">sp O75821 EIF3G_HUMAN</a>   | 1 | 0.12 | 0.11 | 0.03 | 0.03 | -1.04 |
| 460 | 7453   | <b>WARS</b>      | <a href="#">sp P23381-2 SYWC_HUMAN</a>  | 1 | 0.14 | 0.13 | 0.03 | 0.03 | -0.53 |
| 461 | 6500   | <b>SKP1</b>      | <a href="#">sp P63208 SKP1_HUMAN</a>    | 1 | 0.15 | 0.14 | 0.03 | 0.03 | 0.37  |
| 462 | 10262  | <b>SF3B4</b>     | <a href="#">sp Q15427 SF3B4_HUMAN</a>   | 1 | 0.14 | 0.14 | 0.03 | 0.03 | 0.32  |
| 463 | 134147 | <b>CMBL</b>      | <a href="#">sp Q96DG6 CMBL_HUMAN</a>    | 1 | 0.12 | 0.11 | 0.03 | 0.03 | -1.11 |
| 464 | 10051  | <b>SMC4</b>      | <a href="#">sp Q9NTJ3 SMC4_HUMAN</a>    | 1 | 0.13 | 0.13 | 0.03 | 0.03 | -0.05 |
| 465 | 3251   | <b>HPRT1</b>     | <a href="#">sp P00492 HPRT_HUMAN</a>    | 1 | 0.16 | 0.15 | 0.03 | 0.03 | 0.09  |
| 466 | 6182   | <b>MRPL12</b>    | <a href="#">sp P52815 RM12_HUMAN</a>    | 1 | 0.15 | 0.14 | 0.03 | 0.03 | 0.41  |
| 467 | 5692   | <b>PSMB4</b>     | <a href="#">sp P28070 PSB4_HUMAN</a>    | 1 | 0.13 | 0.13 | 0.03 | 0.03 | 0.02  |
| 468 | 2058   | <b>EPRS</b>      | <a href="#">sp P07814 SYEP_HUMAN</a>    | 1 | 0.12 | 0.11 | 0.03 | 0.03 | -0.96 |
| 469 | 682    | <b>BSG</b>       | <a href="#">sp P35613-2 BASI_HUMAN</a>  | 1 | 0.15 | 0.15 | 0.03 | 0.03 | -0.01 |
| 470 | 3192   | <b>HNRNPU</b>    | <a href="#">sp Q00839-2 HNRPU_HUMAN</a> | 1 | 0.13 | 0.12 | 0.03 | 0.03 | -0.52 |
| 471 | 4942   | <b>OAT</b>       | <a href="#">sp P04181 OAT_HUMAN</a>     | 1 | 0.14 | 0.13 | 0.03 | 0.03 | -0.25 |
| 472 | 8370   | <b>HIST2H4A</b>  | <a href="#">sp P62805 H4_HUMAN</a>      | 1 | 0.12 | 0.12 | 0.03 | 0.03 | -0.38 |
| 473 | 10526  | <b>IPO8</b>      | <a href="#">sp O15397 IPO8_HUMAN</a>    | 1 | 0.13 | 0.13 | 0.03 | 0.03 | -0.75 |
| 474 | 6187   | <b>RPS2</b>      | <a href="#">sp P15880 RS2_HUMAN</a>     | 1 | 0.12 | 0.13 | 0.03 | 0.03 | -0.42 |
| 475 | 4678   | <b>NASP</b>      | <a href="#">sp P49321-3 NASP_HUMAN</a>  | 1 | 0.14 | 0.13 | 0.03 | 0.03 | 0.02  |
| 476 | 23136  | <b>EPB41L3</b>   | <a href="#">sp Q9Y2J2-2 E41L3_HUMAN</a> | 1 | 0.15 | 0.15 | 0.03 | 0.03 | -0.05 |
| 477 | 5464   | <b>PPA1</b>      | <a href="#">sp Q15181 IPYR_HUMAN</a>    | 1 | 0.15 | 0.15 | 0.03 | 0.03 | 0.19  |
| 478 | 26292  | <b>MYCBP</b>     | <a href="#">sp Q99417 MYCBP_HUMAN</a>   | 1 | 0.14 | 0.13 | 0.03 | 0.03 | -0.22 |
| 479 | 10291  | <b>SF3A1</b>     | <a href="#">sp Q15459 SF3A1_HUMAN</a>   | 1 | 0.15 | 0.14 | 0.03 | 0.03 | 0.13  |

|     |        |                 |                                         |   |      |      |      |      |       |
|-----|--------|-----------------|-----------------------------------------|---|------|------|------|------|-------|
| 480 | 3054   | <b>HCFC1</b>    | <a href="#">sp P51610-2 HCFC1_HUMAN</a> | 1 | 0.15 | 0.14 | 0.03 | 0.03 | 0.33  |
| 481 | 26986  | <b>PABPC1</b>   | <a href="#">sp P11940-2 PABP1_HUMAN</a> | 1 | 0.15 | 0.15 | 0.03 | 0.03 | 0.15  |
| 482 | 57662  | <b>KIAA1543</b> | <a href="#">sp Q9P1Y5-2 CAMP3_HUMAN</a> | 1 | 0.14 | 0.13 | 0.03 | 0.03 | -0.49 |
| 483 | 257397 | <b>TAB3</b>     | <a href="#">sp Q8N5C8-2 TAB3_HUMAN</a>  | 1 | 0.15 | 0.14 | 0.03 | 0.03 | 0.06  |
| 484 | 26135  | <b>SERBP1</b>   | <a href="#">sp Q8NC51-2 PAIRB_HUMAN</a> | 1 | 0.12 | 0.12 | 0.03 | 0.03 | -0.15 |
| 485 | 6637   | <b>SNRPG</b>    | <a href="#">sp A8MWD9 RUXGL_HUMAN</a>   | 1 | 0.15 | 0.14 | 0.03 | 0.03 | 0.25  |
| 486 | 6636   | <b>SNRPF</b>    | <a href="#">sp P62306 RUXF_HUMAN</a>    | 1 | 0.15 | 0.14 | 0.03 | 0.03 | 0.54  |
| 487 | 6418   | <b>SET</b>      | <a href="#">sp Q01105-2 SET_HUMAN</a>   | 1 | 0.15 | 0.14 | 0.03 | 0.03 | 0.04  |
| 488 | 6635   | <b>SNRPE</b>    | <a href="#">sp P62304 RUXE_HUMAN</a>    | 1 | 0.14 | 0.14 | 0.03 | 0.03 | -0.12 |
| 489 | 5686   | <b>PSMA5</b>    | <a href="#">sp P28066 PSA5_HUMAN</a>    | 1 | 0.13 | 0.13 | 0.03 | 0.03 | -0.24 |
| 490 | 5917   | <b>RARS</b>     | <a href="#">sp P54136-2 SYRC_HUMAN</a>  | 1 | 0.13 | 0.13 | 0.03 | 0.03 | -0.5  |
| 491 | 4173   | <b>MCM4</b>     | <a href="#">sp P33991 MCM4_HUMAN</a>    | 1 | 0.16 | 0.15 | 0.03 | 0.03 | 0.09  |
| 492 | 5110   | <b>PCMT1</b>    | <a href="#">sp P22061-2 PIMT_HUMAN</a>  | 1 | 0.14 | 0.13 | 0.03 | 0.03 | 0.16  |
| 493 | 6741   | <b>SSB</b>      | <a href="#">sp P05455 LA_HUMAN</a>      | 1 | 0.15 | 0.15 | 0.03 | 0.03 | 0.03  |
| 494 | 23318  | <b>ZCCHC11</b>  | <a href="#">sp Q5TAX3-2 TUT4_HUMAN</a>  | 1 | 0.15 | 0.15 | 0.03 | 0.03 | 0.68  |
| 495 | 2618   | <b>GART</b>     | <a href="#">sp P22102-2 PUR2_HUMAN</a>  | 1 | 0.13 | 0.13 | 0.03 | 0.03 | -0.26 |
| 496 | 6634   | <b>SNRPD3</b>   | <a href="#">sp P62318 SMD3_HUMAN</a>    | 1 | 0.12 | 0.12 | 0.03 | 0.03 | -0.27 |
| 497 | 5478   | <b>PPIA</b>     | <a href="#">sp P62937 PPIA_HUMAN</a>    | 1 | 0.12 | 0.11 | 0.03 | 0.03 | -0.49 |
| 498 | 3735   | <b>KARS</b>     | <a href="#">sp Q15046-2 SYK_HUMAN</a>   | 1 | 0.13 | 0.13 | 0.03 | 0.03 | -0.3  |
| 499 | 5683   | <b>PSMA2</b>    | <a href="#">sp P25787 PSA2_HUMAN</a>    | 1 | 0.14 | 0.14 | 0.03 | 0.03 | -0.04 |

| GeneID | Symbol         | Database ID                             | Ave.APSM | S <sup>N</sup> _Score | WS <sup>N</sup> _Score | D <sup>N</sup> _Score | WD <sup>N</sup> _Score | Z_score |
|--------|----------------|-----------------------------------------|----------|-----------------------|------------------------|-----------------------|------------------------|---------|
| 1      | 51622 CCZ1     | <a href="#">sp P86790 CCZ1L_HUMAN</a>   | 469      | 18.31                 | 17.68                  | 30.62                 | 30.62                  | 7.42    |
| 2      | 29919 C18orf8  | <a href="#">sp Q96DM3 MIC1_HUMAN</a>    | 13       | 3.05                  | 2.94                   | 5.1                   | 5.1                    | 7.42    |
| 3      | 22879 MON1B    | <a href="#">sp Q7L1V2 MON1B_HUMAN</a>   | 13       | 3.05                  | 2.94                   | 5.1                   | 5.1                    | 7.42    |
| 4      | 84315 MON1A    | <a href="#">sp Q86VX9 MON1A_HUMAN</a>   | 12       | 2.93                  | 2.83                   | 4.9                   | 4.9                    | 7.42    |
| 5      | 170506 DHX36   | <a href="#">sp Q9H2U1-2 DHX36_HUMAN</a> | 6        | 2.07                  | 2                      | 3.46                  | 3.46                   | 7.46    |
| 6      | 22929 SEPHS1   | <a href="#">sp P49903 SPS1_HUMAN</a>    | 2        | 1.2                   | 1.15                   | 2                     | 2                      | 7.54    |
| 7      | 25819 CCRN4L   | <a href="#">sp Q9UK39 NOCT_HUMAN</a>    | 1        | 0.85                  | 0.82                   | 1.41                  | 1.41                   | 7.54    |
| 8      | 55165 CEP55    | <a href="#">sp Q53EZ4 CEP55_HUMAN</a>   | 1        | 0.85                  | 0.82                   | 1.41                  | 1.41                   | 7.54    |
| 9      | 55086 CXorf57  | <a href="#">sp Q6NSI4 CX057_HUMAN</a>   | 2        | 0.85                  | 0.82                   | 1                     | 1                      | 6.72    |
| 10     | 3306 HSPA2     | <a href="#">sp P54652 HSP72_HUMAN</a>   | 13       | 1.24                  | 1.2                    | 0.85                  | 0.85                   | 2.12    |
| 11     | 10994 ILVBL    | <a href="#">sp A1L0T0 ILVBL_HUMAN</a>   | 2        | 0.6                   | 0.58                   | 0.5                   | 0.5                    | 5.62    |
| 12     | 8500 PPFIA1    | <a href="#">sp Q13136-2 LIPA1_HUMAN</a> | 1        | 0.49                  | 0.47                   | 0.47                  | 0.47                   | 4.13    |
| 13     | 54850 FBXL12   | <a href="#">sp Q9NXK8-2 FXL12_HUMAN</a> | 1        | 0.49                  | 0.47                   | 0.47                  | 0.47                   | 4.13    |
| 14     | 79691 QTRTD1   | <a href="#">sp Q9H974 QTRD1_HUMAN</a>   | 3        | 0.6                   | 0.58                   | 0.41                  | 0.41                   | 4.07    |
| 15     | 4548 MTR       | <a href="#">sp Q99707 METH_HUMAN</a>    | 2        | 0.53                  | 0.52                   | 0.4                   | 0.4                    | 5.25    |
| 16     | 8237 USP11     | <a href="#">sp P51784 UBP11_HUMAN</a>   | 3        | 0.49                  | 0.53                   | 0.27                  | 0.35                   | 2.1     |
| 17     | 10273 STUB1    | <a href="#">sp Q9UNE7 CHIP_HUMAN</a>    | 4        | 0.53                  | 0.56                   | 0.28                  | 0.33                   | 1.15    |
| 18     | 10939 AFG3L2   | <a href="#">sp Q9Y4W6 AFG32_HUMAN</a>   | 2        | 0.36                  | 0.45                   | 0.18                  | 0.3                    | 0.34    |
| 19     | 6749 SSRP1     | <a href="#">sp Q08945 SSRP1_HUMAN</a>   | 2        | 0.45                  | 0.44                   | 0.29                  | 0.29                   | 4.65    |
| 20     | 23197 FAF2     | <a href="#">sp Q96CS3 FAF2_HUMAN</a>    | 1        | 0.3                   | 0.36                   | 0.18                  | 0.28                   | 0.27    |
| 21     | 266971 PIPSL   | <a href="#">sp A2A3N6 PIPSL_HUMAN</a>   | 1        | 0.38                  | 0.37                   | 0.28                  | 0.28                   | 2.47    |
| 22     | 10382 TUBB4    | <a href="#">sp P04350 TBB4_HUMAN</a>    | 26       | 0.79                  | 0.76                   | 0.24                  | 0.24                   | 0.46    |
| 23     | 160428 ALDH1L2 | <a href="#">sp Q3SY69-3 AL1L2_HUMAN</a> | 1        | 0.34                  | 0.33                   | 0.24                  | 0.24                   | 0.81    |
| 24     | 8471 IRS4      | <a href="#">sp O14654 IRS4_HUMAN</a>    | 7        | 0.54                  | 0.52                   | 0.22                  | 0.22                   | 3.04    |
| 25     | 2746 GLUD1     | <a href="#">sp P00367 DHE3_HUMAN</a>    | 2        | 0.4                   | 0.38                   | 0.22                  | 0.22                   | 3.77    |
| 26     | 2956 MSH6      | <a href="#">sp P52701 MSH6_HUMAN</a>    | 5        | 0.45                  | 0.46                   | 0.18                  | 0.2                    | 1.03    |
| 27     | 3312 HSPA8     | <a href="#">sp P11142 HSP7C_HUMAN</a>   | 57       | 0.85                  | 0.82                   | 0.19                  | 0.19                   | 1.03    |
| 28     | 7846 TUBA1A    | <a href="#">sp Q71U36 TBA1A_HUMAN</a>   | 29       | 0.71                  | 0.69                   | 0.19                  | 0.19                   | 0.45    |
| 29     | 9296 ATP6V1F   | <a href="#">sp Q16864 VATF_HUMAN</a>    | 1        | 0.85                  | 0.82                   | 0.19                  | 0.19                   | 7.54    |
| 30     | 5634 PRPS2     | <a href="#">sp P11908-2 PRPS2_HUMAN</a> | 4        | 0.44                  | 0.42                   | 0.19                  | 0.19                   | 1.6     |
| 31     | 55684 C9orf86  | <a href="#">sp Q3YEC7-2 PARF_HUMAN</a>  | 1        | 0.85                  | 0.82                   | 0.19                  | 0.19                   | 7.54    |
| 32     | 27304 MOCS3    | <a href="#">sp O95396 MOCS3_HUMAN</a>   | 1        | 0.85                  | 0.82                   | 0.19                  | 0.19                   | 7.54    |
| 33     | 7576 ZNF28     | <a href="#">sp P17035-2 ZNF28_HUMAN</a> | 1        | 0.85                  | 0.82                   | 0.19                  | 0.19                   | 7.54    |
| 34     | 222229 LRWD1   | <a href="#">sp Q9UFC0 LRWD1_HUMAN</a>   | 1        | 0.85                  | 0.82                   | 0.19                  | 0.19                   | 7.54    |
| 35     | 55717 WDR11    | <a href="#">sp Q9BZH6 WDR11_HUMAN</a>   | 1        | 0.85                  | 0.82                   | 0.19                  | 0.19                   | 7.54    |
| 36     | 10009 ZBTB33   | <a href="#">sp Q86T24 KAISO_HUMAN</a>   | 1        | 0.85                  | 0.82                   | 0.19                  | 0.19                   | 7.54    |
| 37     | 582 BBS1       | <a href="#">sp Q8NFJ9-2 BBS1_HUMAN</a>  | 1        | 0.85                  | 0.82                   | 0.19                  | 0.19                   | 7.54    |



|    |        |                  |                                          |    |      |      |      |      |       |
|----|--------|------------------|------------------------------------------|----|------|------|------|------|-------|
| 38 | 6907   | <b>TBL1X</b>     | <a href="#">sp O60907-2 TBL1X_HUMAN</a>  | 1  | 0.85 | 0.82 | 0.19 | 0.19 | 7.54  |
| 39 | 116113 | <b>FOXP4</b>     | <a href="#">sp Q81VH2 FOXP4_HUMAN</a>    | 1  | 0.85 | 0.82 | 0.19 | 0.19 | 7.54  |
| 40 | 65082  | <b>VPS33A</b>    | <a href="#">sp Q96AX1 VP33A_HUMAN</a>    | 1  | 0.85 | 0.82 | 0.19 | 0.19 | 7.54  |
| 41 | 7398   | <b>USP1</b>      | <a href="#">sp O94782 UBP1_HUMAN</a>     | 1  | 0.85 | 0.82 | 0.19 | 0.19 | 7.54  |
| 42 | 824    | <b>CAPN2</b>     | <a href="#">sp P17655 CAN2_HUMAN</a>     | 1  | 0.85 | 0.82 | 0.19 | 0.19 | 7.54  |
| 43 | 90293  | <b>KLHL13</b>    | <a href="#">sp Q9P2N7-2 KLHL13_HUMAN</a> | 1  | 0.85 | 0.82 | 0.19 | 0.19 | 7.54  |
| 44 | 1387   | <b>CREBBP</b>    | <a href="#">sp Q92793 CBP_HUMAN</a>      | 1  | 0.85 | 0.82 | 0.19 | 0.19 | 7.54  |
| 45 | 200081 | <b>TXLNA</b>     | <a href="#">sp P40222 TXLNA_HUMAN</a>    | 1  | 0.85 | 0.82 | 0.19 | 0.19 | 7.54  |
| 46 | 3304   | <b>HSPA1B</b>    | <a href="#">sp P08107 HSP71_HUMAN</a>    | 50 | 0.79 | 0.76 | 0.18 | 0.18 | 0.5   |
| 47 | 3868   | <b>KRT16</b>     | <a href="#">sp P08779 K1C16_HUMAN</a>    | 3  | 0.35 | 0.38 | 0.14 | 0.18 | 0.13  |
| 48 | 9531   | <b>BAG3</b>      | <a href="#">sp O95817 BAG3_HUMAN</a>     | 1  | 0.3  | 0.29 | 0.18 | 0.18 | 2.46  |
| 49 | 7280   | <b>TUBB2A</b>    | <a href="#">sp Q13885 TBB2A_HUMAN</a>    | 26 | 0.68 | 0.66 | 0.18 | 0.18 | 0.21  |
| 50 | 1642   | <b>DDB1</b>      | <a href="#">sp Q16531 DDB1_HUMAN</a>     | 4  | 0.28 | 0.4  | 0.08 | 0.17 | -0.17 |
| 51 | 7415   | <b>VCP</b>       | <a href="#">sp P55072 TERA_HUMAN</a>     | 9  | 0.35 | 0.49 | 0.08 | 0.17 | -0.35 |
| 52 | 9319   | <b>TRIP13</b>    | <a href="#">sp Q15645 PCH2_HUMAN</a>     | 2  | 0.34 | 0.33 | 0.17 | 0.17 | 2.77  |
| 53 | 391634 | <b>HSP90AB2P</b> | <a href="#">sp Q58FF8 H90B2_HUMAN</a>    | 4  | 0.4  | 0.38 | 0.16 | 0.16 | 1.69  |
| 54 | 10808  | <b>HSPH1</b>     | <a href="#">sp Q92598-3 HS105_HUMAN</a>  | 12 | 0.47 | 0.51 | 0.13 | 0.16 | 1.17  |
| 55 | 117159 | <b>DCD</b>       | <a href="#">sp P81605 DCD_HUMAN</a>      | 1  | 0.28 | 0.27 | 0.16 | 0.16 | 2.27  |
| 56 | 219    | <b>ALDH1B1</b>   | <a href="#">sp P30837 AL1B1_HUMAN</a>    | 1  | 0.28 | 0.27 | 0.16 | 0.16 | 1.06  |
| 57 | 10419  | <b>PRMT5</b>     | <a href="#">sp O14744 ANM5_HUMAN</a>     | 31 | 0.64 | 0.62 | 0.15 | 0.15 | -0.46 |
| 58 | 476    | <b>ATP1A1</b>    | <a href="#">sp P05023 AT1A1_HUMAN</a>    | 8  | 0.35 | 0.45 | 0.09 | 0.15 | 0.2   |
| 59 | 11198  | <b>SUPT16H</b>   | <a href="#">sp Q9Y5B9 SP16H_HUMAN</a>    | 2  | 0.33 | 0.32 | 0.15 | 0.15 | 2.06  |
| 60 | 10376  | <b>TUBA1B</b>    | <a href="#">sp P68363 TBA1B_HUMAN</a>    | 31 | 0.64 | 0.62 | 0.15 | 0.15 | 0.34  |
| 61 | 84790  | <b>TUBA1C</b>    | <a href="#">sp Q9BQE3 TBA1C_HUMAN</a>    | 21 | 0.59 | 0.57 | 0.15 | 0.15 | 0.08  |
| 62 | 10399  | <b>GNB2L1</b>    | <a href="#">sp P63244 GBLP_HUMAN</a>     | 5  | 0.41 | 0.4  | 0.15 | 0.15 | 2.71  |
| 63 | 10383  | <b>TUBB2C</b>    | <a href="#">sp P68371 TBB2C_HUMAN</a>    | 30 | 0.66 | 0.63 | 0.15 | 0.15 | 0.28  |
| 64 | 488    | <b>ATP2A2</b>    | <a href="#">sp P16615-2 AT2A2_HUMAN</a>  | 2  | 0.22 | 0.32 | 0.07 | 0.15 | -0.09 |
| 65 | 3305   | <b>HSPA1L</b>    | <a href="#">sp P34931 HS71L_HUMAN</a>    | 26 | 0.6  | 0.58 | 0.14 | 0.14 | 0.56  |
| 66 | 2316   | <b>FLNA</b>      | <a href="#">sp P21333-2 FLNA_HUMAN</a>   | 30 | 0.62 | 0.6  | 0.14 | 0.14 | -0.76 |
| 67 | 3832   | <b>KIF11</b>     | <a href="#">sp P52732 KIF11_HUMAN</a>    | 11 | 0.45 | 0.47 | 0.12 | 0.14 | -0.13 |
| 68 | 169981 | <b>SPIN3</b>     | <a href="#">sp Q5JUX0 SPIN3_HUMAN</a>    | 4  | 0.38 | 0.37 | 0.14 | 0.14 | 0.77  |
| 69 | 11329  | <b>STK38</b>     | <a href="#">sp Q15208 STK38_HUMAN</a>    | 27 | 0.61 | 0.59 | 0.14 | 0.14 | 0.16  |
| 70 | 5636   | <b>PRPSAP2</b>   | <a href="#">sp O60256 KPRB_HUMAN</a>     | 2  | 0.32 | 0.31 | 0.14 | 0.14 | 0.31  |
| 71 | 203068 | <b>TUBB</b>      | <a href="#">sp P07437 TBB5_HUMAN</a>     | 34 | 0.65 | 0.63 | 0.14 | 0.14 | 0.07  |
| 72 | 84617  | <b>TUBB6</b>     | <a href="#">sp Q9BUF5 TBB6_HUMAN</a>     | 13 | 0.51 | 0.49 | 0.14 | 0.14 | 0.37  |
| 73 | 5631   | <b>PRPS1</b>     | <a href="#">sp P60891 PRPS1_HUMAN</a>    | 5  | 0.39 | 0.38 | 0.14 | 0.14 | 1.4   |
| 74 | 7086   | <b>TKT</b>       | <a href="#">sp P29401 TKT_HUMAN</a>      | 2  | 0.32 | 0.31 | 0.14 | 0.14 | 1.63  |
| 75 | 10797  | <b>MTHFD2</b>    | <a href="#">sp P13995 MTDC_HUMAN</a>     | 1  | 0.27 | 0.26 | 0.14 | 0.14 | 1.84  |
| 76 | 5203   | <b>PFDN4</b>     | <a href="#">sp Q9NQP4 PFD4_HUMAN</a>     | 1  | 0.23 | 0.25 | 0.11 | 0.13 | 0.47  |

|     |        |                 |                                         |    |      |      |      |      |       |
|-----|--------|-----------------|-----------------------------------------|----|------|------|------|------|-------|
| 77  | 23384  | <b>SPECC1L</b>  | <a href="#">sp Q69YQ0 CYTSA_HUMAN</a>   | 1  | 0.6  | 0.58 | 0.13 | 0.13 | 5.05  |
| 78  | 4522   | <b>MTHFD1</b>   | <a href="#">sp P11586 C1TC_HUMAN</a>    | 5  | 0.38 | 0.37 | 0.13 | 0.13 | 3.11  |
| 79  | 8815   | <b>BANF1</b>    | <a href="#">sp O75531 BAF_HUMAN</a>     | 1  | 0.6  | 0.58 | 0.13 | 0.13 | 5.05  |
| 80  | 22824  | <b>HSPA4L</b>   | <a href="#">sp O95757 HS74L_HUMAN</a>   | 9  | 0.44 | 0.43 | 0.13 | 0.13 | 0.98  |
| 81  | 3308   | <b>HSPA4</b>    | <a href="#">sp P34932 HSP74_HUMAN</a>   | 20 | 0.55 | 0.53 | 0.13 | 0.13 | 0.98  |
| 82  | 4763   | <b>NF1</b>      | <a href="#">sp P21359-2 NF1_HUMAN</a>   | 1  | 0.6  | 0.58 | 0.13 | 0.13 | 5.05  |
| 83  | 2201   | <b>FBN2</b>     | <a href="#">sp P35556 FBN2_HUMAN</a>    | 1  | 0.49 | 0.56 | 0.11 | 0.13 | 0.35  |
| 84  | 26993  | <b>AKAP8L</b>   | <a href="#">sp Q9ULX6 AKP8L_HUMAN</a>   | 1  | 0.6  | 0.58 | 0.13 | 0.13 | 5.05  |
| 85  | 22930  | <b>RAB3GAP1</b> | <a href="#">sp Q15042 RB3GP_HUMAN</a>   | 1  | 0.6  | 0.58 | 0.13 | 0.13 | 5.05  |
| 86  | 54832  | <b>VPS13C</b>   | <a href="#">sp Q709C8-2 VP13C_HUMAN</a> | 1  | 0.6  | 0.58 | 0.13 | 0.13 | 5.05  |
| 87  | 57414  | <b>RHBDD2</b>   | <a href="#">sp Q6NTF9 RHBD2_HUMAN</a>   | 1  | 0.6  | 0.58 | 0.13 | 0.13 | 5.05  |
| 88  | 3310   | <b>HSPA6</b>    | <a href="#">sp P17066 HSP76_HUMAN</a>   | 18 | 0.5  | 0.49 | 0.12 | 0.12 | 1.11  |
| 89  | 79734  | <b>KCTD17</b>   | <a href="#">sp Q8N5Z5-2 KCD17_HUMAN</a> | 4  | 0.35 | 0.33 | 0.12 | 0.12 | -0.09 |
| 90  | 79084  | <b>WDR77</b>    | <a href="#">sp Q9BQA1 MEP50_HUMAN</a>   | 20 | 0.52 | 0.5  | 0.12 | 0.12 | 0.06  |
| 91  | 6510   | <b>SLC1A5</b>   | <a href="#">sp Q15758 AAAT_HUMAN</a>    | 1  | 0.21 | 0.24 | 0.09 | 0.12 | 0.26  |
| 92  | 1460   | <b>CSNK2B</b>   | <a href="#">sp P67870 CSK2B_HUMAN</a>   | 2  | 0.3  | 0.29 | 0.12 | 0.12 | 1.75  |
| 93  | 9898   | <b>UBAP2L</b>   | <a href="#">sp Q14157-1 UBP2L_HUMAN</a> | 1  | 0.42 | 0.53 | 0.09 | 0.12 | 0.19  |
| 94  | 89941  | <b>RHOT2</b>    | <a href="#">sp Q8IXI1 MIRO2_HUMAN</a>   | 1  | 0.49 | 0.47 | 0.11 | 0.11 | 2.91  |
| 95  | 10694  | <b>CCT8</b>     | <a href="#">sp P50990 TCPQ_HUMAN</a>    | 19 | 0.49 | 0.48 | 0.11 | 0.11 | -0.07 |
| 96  | 7203   | <b>CCT3</b>     | <a href="#">sp P49368 TCPG_HUMAN</a>    | 18 | 0.48 | 0.47 | 0.11 | 0.11 | 0.01  |
| 97  | 4627   | <b>MYH9</b>     | <a href="#">sp P35579 MYH9_HUMAN</a>    | 14 | 0.45 | 0.44 | 0.11 | 0.11 | 1.7   |
| 98  | 372    | <b>ARCN1</b>    | <a href="#">sp P48444 COPD_HUMAN</a>    | 3  | 0.31 | 0.3  | 0.11 | 0.11 | 2.21  |
| 99  | 8241   | <b>RBM10</b>    | <a href="#">sp P98175-2 RBM10_HUMAN</a> | 14 | 0.45 | 0.44 | 0.11 | 0.11 | -0.26 |
| 100 | 6520   | <b>SLC3A2</b>   | <a href="#">sp P08195-2 4F2_HUMAN</a>   | 3  | 0.31 | 0.3  | 0.11 | 0.11 | 1.51  |
| 101 | 7520   | <b>XRCC5</b>    | <a href="#">sp P13010 XRCC5_HUMAN</a>   | 3  | 0.31 | 0.3  | 0.11 | 0.11 | 0.85  |
| 102 | 54442  | <b>KCTD5</b>    | <a href="#">sp Q9NXV2 KCTD5_HUMAN</a>   | 4  | 0.33 | 0.32 | 0.11 | 0.11 | -0.08 |
| 103 | 23193  | <b>GANAB</b>    | <a href="#">sp Q14697-2 GANAB_HUMAN</a> | 2  | 0.26 | 0.27 | 0.1  | 0.11 | 0.69  |
| 104 | 2027   | <b>ENO3</b>     | <a href="#">sp P13929-2 ENOB_HUMAN</a>  | 2  | 0.28 | 0.27 | 0.11 | 0.11 | 1.02  |
| 105 | 79596  | <b>RNF219</b>   | <a href="#">sp Q5W0B1 RN219_HUMAN</a>   | 3  | 0.31 | 0.3  | 0.11 | 0.11 | 1.37  |
| 106 | 93436  | <b>ARMC6</b>    | <a href="#">sp Q6NXE6-2 ARMC6_HUMAN</a> | 1  | 0.49 | 0.47 | 0.11 | 0.11 | 2.91  |
| 107 | 6950   | <b>TCP1</b>     | <a href="#">sp P17987 TCPA_HUMAN</a>    | 21 | 0.51 | 0.5  | 0.11 | 0.11 | 0.14  |
| 108 | 5431   | <b>POLR2B</b>   | <a href="#">sp P30876 RPB2_HUMAN</a>    | 1  | 0.2  | 0.23 | 0.08 | 0.11 | 0.38  |
| 109 | 1975   | <b>EIF4B</b>    | <a href="#">sp P23588 IF4B_HUMAN</a>    | 12 | 0.44 | 0.42 | 0.11 | 0.11 | -0.28 |
| 110 | 55847  | <b>CISD1</b>    | <a href="#">sp Q9NZ45 CISD1_HUMAN</a>   | 1  | 0.42 | 0.47 | 0.09 | 0.11 | 0.65  |
| 111 | 131474 | <b>CHCHD4</b>   | <a href="#">sp Q8N4Q1-2 MIA40_HUMAN</a> | 2  | 0.28 | 0.27 | 0.11 | 0.11 | 0.99  |
| 112 | 377    | <b>ARF3</b>     | <a href="#">sp P61204 ARF3_HUMAN</a>    | 2  | 0.27 | 0.26 | 0.11 | 0.11 | 1.84  |
| 113 | 55720  | <b>TSR1</b>     | <a href="#">sp Q2NL82 TSR1_HUMAN</a>    | 1  | 0.49 | 0.47 | 0.11 | 0.11 | 4.13  |
| 114 | 27183  | <b>VPS4A</b>    | <a href="#">sp Q9UN37 VPS4A_HUMAN</a>   | 1  | 0.49 | 0.47 | 0.11 | 0.11 | 2.12  |
| 115 | 89891  | <b>WDR34</b>    | <a href="#">sp Q96EX3 WDR34_HUMAN</a>   | 1  | 0.49 | 0.47 | 0.11 | 0.11 | 4.13  |

|     |        |                 |                                         |    |      |      |      |      |       |
|-----|--------|-----------------|-----------------------------------------|----|------|------|------|------|-------|
| 116 | 7372   | <b>UMPS</b>     | <a href="#">sp P11172 UMPS_HUMAN</a>    | 1  | 0.49 | 0.47 | 0.11 | 0.11 | 4.13  |
| 117 | 79892  | <b>MCMBP</b>    | <a href="#">sp Q9BTE3-2 MCMBP_HUMAN</a> | 1  | 0.49 | 0.47 | 0.11 | 0.11 | 4.13  |
| 118 | 7957   | <b>EPM2A</b>    | <a href="#">sp O95278-2 EPM2A_HUMAN</a> | 1  | 0.23 | 0.23 | 0.11 | 0.11 | 1.08  |
| 119 | 118460 | <b>EXOSC6</b>   | <a href="#">sp Q5RKV6 EXOSC6_HUMAN</a>  | 1  | 0.49 | 0.47 | 0.11 | 0.11 | 4.13  |
| 120 | 26504  | <b>CNNM4</b>    | <a href="#">sp Q6P4Q7 CNNM4_HUMAN</a>   | 1  | 0.49 | 0.47 | 0.11 | 0.11 | 4.13  |
| 121 | 22818  | <b>COPZ1</b>    | <a href="#">sp P61923 COPZ1_HUMAN</a>   | 1  | 0.49 | 0.47 | 0.11 | 0.11 | 4.13  |
| 122 | 150472 | <b>CBWD2</b>    | <a href="#">sp Q8IUF1 CBWD2_HUMAN</a>   | 1  | 0.49 | 0.47 | 0.11 | 0.11 | 4.13  |
| 123 | 79184  | <b>BRCC3</b>    | <a href="#">sp P46736-2 BRCC3_HUMAN</a> | 1  | 0.49 | 0.47 | 0.11 | 0.11 | 4.13  |
| 124 | 3309   | <b>HSPA5</b>    | <a href="#">sp P11021 GRP78_HUMAN</a>   | 17 | 0.47 | 0.45 | 0.1  | 0.1  | 0.1   |
| 125 | 2194   | <b>FASN</b>     | <a href="#">sp P49327 FAS_HUMAN</a>     | 8  | 0.35 | 0.37 | 0.09 | 0.1  | 0.4   |
| 126 | 3849   | <b>KRT2</b>     | <a href="#">sp P35908 K22E_HUMAN</a>    | 13 | 0.42 | 0.41 | 0.1  | 0.1  | 0.73  |
| 127 | 144097 | <b>C11orf84</b> | <a href="#">sp Q9BUA3 CK084_HUMAN</a>   | 11 | 0.4  | 0.39 | 0.1  | 0.1  | 0.12  |
| 128 | 10574  | <b>CCT7</b>     | <a href="#">sp Q99832 TCPH_HUMAN</a>    | 16 | 0.45 | 0.43 | 0.1  | 0.1  | 0     |
| 129 | 10575  | <b>CCT4</b>     | <a href="#">sp P50991 TCPD_HUMAN</a>    | 15 | 0.44 | 0.42 | 0.1  | 0.1  | -0.19 |
| 130 | 10927  | <b>SPIN1</b>    | <a href="#">sp Q9Y657 SPIN1_HUMAN</a>   | 11 | 0.41 | 0.39 | 0.1  | 0.1  | 0.47  |
| 131 | 23527  | <b>ACAP2</b>    | <a href="#">sp Q15057 ACAP2_HUMAN</a>   | 3  | 0.29 | 0.28 | 0.1  | 0.1  | 0.89  |
| 132 | 10576  | <b>CCT2</b>     | <a href="#">sp P78371 TCPB_HUMAN</a>    | 16 | 0.45 | 0.44 | 0.1  | 0.1  | -0.22 |
| 133 | 23510  | <b>KCTD2</b>    | <a href="#">sp Q14681 KCTD2_HUMAN</a>   | 3  | 0.3  | 0.29 | 0.1  | 0.1  | 0.27  |
| 134 | 51479  | <b>ANKFY1</b>   | <a href="#">sp Q9P2R3-2 ANFY1_HUMAN</a> | 11 | 0.42 | 0.4  | 0.1  | 0.1  | -0.06 |
| 135 | 79568  | <b>C2orf47</b>  | <a href="#">sp Q8WWC4 CB047_HUMAN</a>   | 1  | 0.32 | 0.44 | 0.07 | 0.1  | 0.08  |
| 136 | 55746  | <b>NUP133</b>   | <a href="#">sp Q8WUM0 NU133_HUMAN</a>   | 1  | 0.23 | 0.22 | 0.1  | 0.1  | 1.36  |
| 137 | 7411   | <b>VBP1</b>     | <a href="#">sp P61758 PFD3_HUMAN</a>    | 1  | 0.21 | 0.22 | 0.09 | 0.1  | 0.25  |
| 138 | 873    | <b>CBR1</b>     | <a href="#">sp P16152 CBR1_HUMAN</a>    | 1  | 0.23 | 0.22 | 0.1  | 0.1  | 0.81  |
| 139 | 226    | <b>ALDOA</b>    | <a href="#">sp P04075 ALDOA_HUMAN</a>   | 2  | 0.25 | 0.24 | 0.09 | 0.09 | 1.12  |
| 140 | 3858   | <b>KRT10</b>    | <a href="#">sp P13645 K1C10_HUMAN</a>   | 12 | 0.4  | 0.38 | 0.09 | 0.09 | 0.25  |
| 141 | 3848   | <b>KRT1</b>     | <a href="#">sp P04264 K2C1_HUMAN</a>    | 12 | 0.39 | 0.38 | 0.09 | 0.09 | -0.23 |
| 142 | 54953  | <b>C1orf27</b>  | <a href="#">sp Q5SWX8-2 ODR4_HUMAN</a>  | 1  | 0.22 | 0.21 | 0.09 | 0.09 | 0.37  |
| 143 | 70     | <b>ACTC1</b>    | <a href="#">sp P68032 ACTC_HUMAN</a>    | 4  | 0.29 | 0.28 | 0.09 | 0.09 | -0.06 |
| 144 | 908    | <b>CCT6A</b>    | <a href="#">sp P40227 TCPZ_HUMAN</a>    | 13 | 0.41 | 0.4  | 0.09 | 0.09 | 0.08  |
| 145 | 4628   | <b>MYH10</b>    | <a href="#">sp P35580-2 MYH10_HUMAN</a> | 7  | 0.35 | 0.33 | 0.09 | 0.09 | 0.98  |
| 146 | 5111   | <b>PCNA</b>     | <a href="#">sp P12004 PCNA_HUMAN</a>    | 5  | 0.31 | 0.3  | 0.09 | 0.09 | 0.8   |
| 147 | 3313   | <b>HSPA9</b>    | <a href="#">sp P38646 GRP75_HUMAN</a>   | 14 | 0.42 | 0.41 | 0.09 | 0.09 | -0.08 |
| 148 | 23012  | <b>STK38L</b>   | <a href="#">sp Q9Y2H1 ST38L_HUMAN</a>   | 9  | 0.37 | 0.36 | 0.09 | 0.09 | -0.25 |
| 149 | 55750  | <b>AGK</b>      | <a href="#">sp Q53H12 AGK_HUMAN</a>     | 1  | 0.22 | 0.21 | 0.09 | 0.09 | 0.48  |
| 150 | 55749  | <b>CCAR1</b>    | <a href="#">sp Q8IX12-2 CCAR1_HUMAN</a> | 2  | 0.26 | 0.25 | 0.09 | 0.09 | 0.78  |
| 151 | 5202   | <b>PFDN2</b>    | <a href="#">sp Q9UHV9 PFD2_HUMAN</a>    | 3  | 0.26 | 0.28 | 0.08 | 0.09 | 1.09  |
| 152 | 9747   | <b>FAM115A</b>  | <a href="#">sp Q9Y4C2-2 F115A_HUMAN</a> | 1  | 0.42 | 0.41 | 0.09 | 0.09 | 3.58  |
| 153 | 10625  | <b>IVNS1ABP</b> | <a href="#">sp Q9Y6Y0 INS1BP_HUMAN</a>  | 6  | 0.33 | 0.32 | 0.09 | 0.09 | 0.48  |
| 154 | 10357  | <b>HMGB1P1</b>  | <a href="#">sp B2RPK0 HGB1A_HUMAN</a>   | 1  | 0.42 | 0.41 | 0.09 | 0.09 | 3.58  |

|     |           |                 |                                         |    |      |      |      |      |       |
|-----|-----------|-----------------|-----------------------------------------|----|------|------|------|------|-------|
| 155 | 84263     | <b>HSDL2</b>    | <a href="#">sp Q6YN16-2 HSDL2_HUMAN</a> | 1  | 0.42 | 0.41 | 0.09 | 0.09 | 3.58  |
| 156 | 10454     | <b>TAB1</b>     | <a href="#">sp Q15750 TAB1_HUMAN</a>    | 9  | 0.38 | 0.37 | 0.09 | 0.09 | 0.07  |
| 157 | 5033      | <b>P4HA1</b>    | <a href="#">sp P13674-2 P4HA1_HUMAN</a> | 2  | 0.25 | 0.24 | 0.09 | 0.09 | 1.8   |
| 158 | 9529      | <b>BAG5</b>     | <a href="#">sp Q9UL15-2 BAG5_HUMAN</a>  | 1  | 0.42 | 0.41 | 0.09 | 0.09 | 3.58  |
| 159 | 1457      | <b>CSNK2A1</b>  | <a href="#">sp P68400 CSK21_HUMAN</a>   | 1  | 0.21 | 0.2  | 0.09 | 0.09 | 0.34  |
| 160 | 6059      | <b>ABCE1</b>    | <a href="#">sp P61221 ABCE1_HUMAN</a>   | 1  | 0.42 | 0.41 | 0.09 | 0.09 | 3.58  |
| 161 | 9810      | <b>RNF40</b>    | <a href="#">sp O75150-3 BRE1B_HUMAN</a> | 1  | 0.42 | 0.41 | 0.09 | 0.09 | 3.58  |
| 162 | 5531      | <b>PPP4C</b>    | <a href="#">sp P60510 PP4C_HUMAN</a>    | 1  | 0.3  | 0.38 | 0.07 | 0.09 | 0.37  |
| 163 | 3320      | <b>HSP90AA1</b> | <a href="#">sp P07900-2 HS90A_HUMAN</a> | 10 | 0.37 | 0.35 | 0.08 | 0.08 | 0.6   |
| 164 | 3326      | <b>HSP90AB1</b> | <a href="#">sp P08238 HS90B_HUMAN</a>   | 9  | 0.35 | 0.34 | 0.08 | 0.08 | 0.14  |
| 165 | 5209      | <b>PFKFB3</b>   | <a href="#">sp Q16875-2 F263_HUMAN</a>  | 5  | 0.3  | 0.29 | 0.08 | 0.08 | 0.38  |
| 166 | 1267      | <b>CNP</b>      | <a href="#">sp P09543-2 CN37_HUMAN</a>  | 2  | 0.36 | 0.35 | 0.08 | 0.08 | 1.79  |
| 167 | 26121     | <b>PRPF31</b>   | <a href="#">sp Q8WWY3 PRP31_HUMAN</a>   | 7  | 0.32 | 0.31 | 0.08 | 0.08 | -0.41 |
| 168 | 6885      | <b>MAP3K7</b>   | <a href="#">sp O43318-2 M3K7_HUMAN</a>  | 6  | 0.32 | 0.31 | 0.08 | 0.08 | 0.35  |
| 169 | 2023      | <b>ENO1</b>     | <a href="#">sp P06733 ENOA_HUMAN</a>    | 4  | 0.25 | 0.28 | 0.06 | 0.08 | 0.26  |
| 170 | 11140     | <b>CDC37</b>    | <a href="#">sp Q16543 CDC37_HUMAN</a>   | 2  | 0.23 | 0.23 | 0.08 | 0.08 | 2.33  |
| 171 | 3301      | <b>DNAJA1</b>   | <a href="#">sp P31689 DNJA1_HUMAN</a>   | 5  | 0.3  | 0.29 | 0.08 | 0.08 | 1.17  |
| 172 | 9793      | <b>CKAP5</b>    | <a href="#">sp Q14008-2 CKAP5_HUMAN</a> | 4  | 0.28 | 0.27 | 0.08 | 0.08 | -0.09 |
| 173 | 10294     | <b>DNAJA2</b>   | <a href="#">sp O60884 DNJA2_HUMAN</a>   | 5  | 0.3  | 0.29 | 0.08 | 0.08 | 0.97  |
| 174 | 5515      | <b>PPP2CA</b>   | <a href="#">sp P67775 PP2AA_HUMAN</a>   | 1  | 0.34 | 0.33 | 0.08 | 0.08 | 1.44  |
| 175 | 1207      | <b>CLNS1A</b>   | <a href="#">sp P54105 ICLN_HUMAN</a>    | 8  | 0.35 | 0.34 | 0.08 | 0.08 | -0.21 |
| 176 | 23112     | <b>TNRC6B</b>   | <a href="#">sp Q9UPQ9-1 TNR6B_HUMAN</a> | 1  | 0.2  | 0.2  | 0.08 | 0.08 | 0.6   |
| 177 | 1825      | <b>DSC3</b>     | <a href="#">sp Q14574-2 DSC3_HUMAN</a>  | 1  | 0.38 | 0.37 | 0.08 | 0.08 | 3.14  |
| 178 | 4507      | <b>MTAP</b>     | <a href="#">sp Q13126 MTAP_HUMAN</a>    | 1  | 0.38 | 0.37 | 0.08 | 0.08 | 3.14  |
| 179 | 10540     | <b>DCTN2</b>    | <a href="#">sp Q13561-2 DCTN2_HUMAN</a> | 3  | 0.2  | 0.26 | 0.05 | 0.08 | -0.1  |
| 180 | 11051     | <b>NUDT21</b>   | <a href="#">sp O43809 CPSF5_HUMAN</a>   | 1  | 0.34 | 0.33 | 0.08 | 0.08 | 1.58  |
| 181 | 1503      | <b>CTPS</b>     | <a href="#">sp P17812 PYRG1_HUMAN</a>   | 1  | 0.2  | 0.19 | 0.08 | 0.08 | 0.15  |
| 182 | 400       | <b>ARL1</b>     | <a href="#">sp P40616 ARL1_HUMAN</a>    | 1  | 0.34 | 0.33 | 0.08 | 0.08 | 2.32  |
| 183 | 54039     | <b>PCBP3</b>    | <a href="#">sp P57721-2 PCBP3_HUMAN</a> | 1  | 0.34 | 0.33 | 0.08 | 0.08 | 2.87  |
| 184 | 53918     | <b>PELO</b>     | <a href="#">sp Q9BRX2 PELO_HUMAN</a>    | 1  | 0.34 | 0.33 | 0.08 | 0.08 | 1.79  |
| 185 | 3838      | <b>KPNA2</b>    | <a href="#">sp P52292 IMA2_HUMAN</a>    | 2  | 0.24 | 0.24 | 0.08 | 0.08 | 1.26  |
| 186 | 9631      | <b>NUP155</b>   | <a href="#">sp O75694-2 NU155_HUMAN</a> | 1  | 0.34 | 0.33 | 0.08 | 0.08 | 2.87  |
| 187 | 593       | <b>BCKDHA</b>   | <a href="#">sp P12694 ODBA_HUMAN</a>    | 1  | 0.38 | 0.37 | 0.08 | 0.08 | 3.14  |
| 188 | 100287932 | <b>TIMM23</b>   | <a href="#">sp O14925 TIM23_HUMAN</a>   | 1  | 0.34 | 0.33 | 0.08 | 0.08 | 2.87  |
| 189 | 1937      | <b>EEF1G</b>    | <a href="#">sp P26641 EF1G_HUMAN</a>    | 7  | 0.3  | 0.29 | 0.07 | 0.07 | -0.14 |
| 190 | 6175      | <b>RPLP0</b>    | <a href="#">sp P05388 RLA0_HUMAN</a>    | 2  | 0.23 | 0.22 | 0.07 | 0.07 | 0.54  |
| 191 | 84188     | <b>FAR1</b>     | <a href="#">sp Q8WVX9 FACR1_HUMAN</a>   | 1  | 0.3  | 0.29 | 0.07 | 0.07 | 2.46  |
| 192 | 178       | <b>AGL</b>      | <a href="#">sp P35573-2 GDE_HUMAN</a>   | 7  | 0.3  | 0.29 | 0.07 | 0.07 | -0.57 |
| 193 | 83732     | <b>RIOK1</b>    | <a href="#">sp Q9BRS2 RIOK1_HUMAN</a>   | 5  | 0.28 | 0.27 | 0.07 | 0.07 | -0.39 |

|     |        |                |                                         |   |      |      |      |      |       |
|-----|--------|----------------|-----------------------------------------|---|------|------|------|------|-------|
| 194 | 22948  | <b>CCT5</b>    | <a href="#">sp P48643 TCPE_HUMAN</a>    | 8 | 0.32 | 0.31 | 0.07 | 0.07 | -0.47 |
| 195 | 3857   | <b>KRT9</b>    | <a href="#">sp P35527 K1C9_HUMAN</a>    | 6 | 0.29 | 0.28 | 0.07 | 0.07 | -0.24 |
| 196 | 10471  | <b>PFDN6</b>   | <a href="#">sp O15212 PFD6_HUMAN</a>    | 1 | 0.27 | 0.31 | 0.06 | 0.07 | 0.4   |
| 197 | 3251   | <b>HPRT1</b>   | <a href="#">sp P00492 HPRT_HUMAN</a>    | 2 | 0.22 | 0.21 | 0.07 | 0.07 | 0.86  |
| 198 | 8452   | <b>CUL3</b>    | <a href="#">sp Q13618-2 CUL3_HUMAN</a>  | 1 | 0.3  | 0.3  | 0.07 | 0.07 | 0.55  |
| 199 | 3185   | <b>HNRNPF</b>  | <a href="#">sp P52597 HNRPF_HUMAN</a>   | 3 | 0.26 | 0.25 | 0.07 | 0.07 | 0.63  |
| 200 | 1915   | <b>EEF1A1</b>  | <a href="#">sp P68104 EF1A1_HUMAN</a>   | 7 | 0.3  | 0.29 | 0.07 | 0.07 | -0.24 |
| 201 | 6240   | <b>RRM1</b>    | <a href="#">sp P23921 RIR1_HUMAN</a>    | 1 | 0.3  | 0.29 | 0.07 | 0.07 | 2.46  |
| 202 | 5204   | <b>PFDN5</b>   | <a href="#">sp Q99471 PFD5_HUMAN</a>    | 1 | 0.24 | 0.29 | 0.05 | 0.07 | 0.4   |
| 203 | 5704   | <b>PSMC4</b>   | <a href="#">sp P43686 PRS6B_HUMAN</a>   | 2 | 0.23 | 0.22 | 0.07 | 0.07 | 1.2   |
| 204 | 23450  | <b>SF3B3</b>   | <a href="#">sp Q15393 SF3B3_HUMAN</a>   | 6 | 0.29 | 0.28 | 0.07 | 0.07 | 0.29  |
| 205 | 55858  | <b>TMEM165</b> | <a href="#">sp Q9HC07 TM165_HUMAN</a>   | 1 | 0.3  | 0.29 | 0.07 | 0.07 | 1.22  |
| 206 | 224    | <b>ALDH3A2</b> | <a href="#">sp P51648-2 AL3A2_HUMAN</a> | 1 | 0.32 | 0.31 | 0.07 | 0.07 | 1.05  |
| 207 | 23118  | <b>TAB2</b>    | <a href="#">sp Q9NYJ8 TAB2_HUMAN</a>    | 3 | 0.25 | 0.24 | 0.07 | 0.07 | 1.15  |
| 208 | 2193   | <b>FARSA</b>   | <a href="#">sp Q9Y285 SYFA_HUMAN</a>    | 1 | 0.3  | 0.29 | 0.07 | 0.07 | 2.05  |
| 209 | 23157  | <b>6-Sep</b>   | <a href="#">sp Q14141-2 SEPT6_HUMAN</a> | 1 | 0.32 | 0.31 | 0.07 | 0.07 | 2.15  |
| 210 | 23770  | <b>FKBP8</b>   | <a href="#">sp Q14318-2 FKBP8_HUMAN</a> | 1 | 0.3  | 0.29 | 0.07 | 0.07 | 1.74  |
| 211 | 790    | <b>CAD</b>     | <a href="#">sp P27708 PYR1_HUMAN</a>    | 7 | 0.3  | 0.29 | 0.07 | 0.07 | 0.05  |
| 212 | 5034   | <b>P4HB</b>    | <a href="#">sp P07237 PDIA1_HUMAN</a>   | 1 | 0.18 | 0.28 | 0.04 | 0.07 | -0.01 |
| 213 | 55747  | <b>FAM21B</b>  | <a href="#">sp Q5SNT6 FA21B_HUMAN</a>   | 1 | 0.3  | 0.29 | 0.07 | 0.07 | 2.46  |
| 214 | 3295   | <b>HSD17B4</b> | <a href="#">sp P51659 DHB4_HUMAN</a>    | 1 | 0.3  | 0.29 | 0.07 | 0.07 | 2.05  |
| 215 | 2547   | <b>XRCC6</b>   | <a href="#">sp P12956 XRCC6_HUMAN</a>   | 3 | 0.25 | 0.24 | 0.07 | 0.07 | 0.4   |
| 216 | 654483 | <b>BOLA2B</b>  | <a href="#">sp Q9H3K6-2 BOLA2_HUMAN</a> | 1 | 0.3  | 0.29 | 0.07 | 0.07 | 2.05  |
| 217 | 79869  | <b>CPSF7</b>   | <a href="#">sp Q8N684-2 CPSF7_HUMAN</a> | 1 | 0.3  | 0.29 | 0.07 | 0.07 | 2.46  |
| 218 | 6748   | <b>SSR4</b>    | <a href="#">sp P51571 SSRD_HUMAN</a>    | 4 | 0.27 | 0.26 | 0.07 | 0.07 | 2.23  |
| 219 | 9141   | <b>PDCD5</b>   | <a href="#">sp O14737 PDCD5_HUMAN</a>   | 1 | 0.32 | 0.31 | 0.07 | 0.07 | 2.67  |
| 220 | 84284  | <b>NTPCR</b>   | <a href="#">sp Q9BSD7 NTPCR_HUMAN</a>   | 1 | 0.3  | 0.29 | 0.07 | 0.07 | 1.27  |
| 221 | 5707   | <b>PSMD1</b>   | <a href="#">sp Q99460-2 PSMD1_HUMAN</a> | 4 | 0.24 | 0.24 | 0.06 | 0.06 | 0.15  |
| 222 | 3861   | <b>KRT14</b>   | <a href="#">sp P02533 K1C14_HUMAN</a>   | 2 | 0.2  | 0.2  | 0.06 | 0.06 | -0.2  |
| 223 | 25939  | <b>SAMHD1</b>  | <a href="#">sp Q9Y3Z3-2 SAMH1_HUMAN</a> | 1 | 0.27 | 0.26 | 0.06 | 0.06 | 0.72  |
| 224 | 708    | <b>C1QBP</b>   | <a href="#">sp Q07021 C1QBP_HUMAN</a>   | 5 | 0.25 | 0.24 | 0.06 | 0.06 | 0.47  |
| 225 | 60     | <b>ACTB</b>    | <a href="#">sp P60709 ACTB_HUMAN</a>    | 6 | 0.28 | 0.27 | 0.06 | 0.06 | -0.59 |
| 226 | 8239   | <b>USP9X</b>   | <a href="#">sp Q93008-1 USP9X_HUMAN</a> | 1 | 0.24 | 0.27 | 0.05 | 0.06 | 0.23  |
| 227 | 6921   | <b>TCEB1</b>   | <a href="#">sp Q15369 ELOC_HUMAN</a>    | 1 | 0.18 | 0.17 | 0.06 | 0.06 | 0.75  |
| 228 | 7385   | <b>UQCRC2</b>  | <a href="#">sp P22695 QCR2_HUMAN</a>    | 1 | 0.27 | 0.26 | 0.06 | 0.06 | 0.9   |
| 229 | 1938   | <b>EEF2</b>    | <a href="#">sp P13639 EF2_HUMAN</a>     | 4 | 0.24 | 0.24 | 0.06 | 0.06 | 0.14  |
| 230 | 3329   | <b>HSPD1</b>   | <a href="#">sp P10809 CH60_HUMAN</a>    | 6 | 0.28 | 0.27 | 0.06 | 0.06 | -0.14 |
| 231 | 292    | <b>SLC25A5</b> | <a href="#">sp P05141 ADT2_HUMAN</a>    | 5 | 0.26 | 0.25 | 0.06 | 0.06 | 0.2   |
| 232 | 5315   | <b>PKM2</b>    | <a href="#">tr E7EUQ8 E7EUQ8_HUMAN</a>  | 5 | 0.27 | 0.26 | 0.06 | 0.06 | -0.19 |

|     |        |                 |                                         |   |      |      |      |      |       |
|-----|--------|-----------------|-----------------------------------------|---|------|------|------|------|-------|
| 233 | 10155  | <b>TRIM28</b>   | <a href="#">sp Q13263-2 TIF1B_HUMAN</a> | 4 | 0.24 | 0.23 | 0.06 | 0.06 | 0.38  |
| 234 | 9967   | <b>THRAP3</b>   | <a href="#">sp Q9Y2W1 TR150_HUMAN</a>   | 4 | 0.25 | 0.24 | 0.06 | 0.06 | -0.66 |
| 235 | 93664  | <b>CADPS2</b>   | <a href="#">sp Q86UW7-2 CAPS2_HUMAN</a> | 1 | 0.18 | 0.17 | 0.06 | 0.06 | 0.03  |
| 236 | 6500   | <b>SKP1</b>     | <a href="#">tr E5RI56 E5RI56_HUMAN</a>  | 2 | 0.2  | 0.2  | 0.06 | 0.06 | 1.76  |
| 237 | 9131   | <b>AIFM1</b>    | <a href="#">sp O95831-3 AIFM1_HUMAN</a> | 4 | 0.24 | 0.23 | 0.06 | 0.06 | -0.01 |
| 238 | 1936   | <b>EEF1D</b>    | <a href="#">sp P29692-2 EF1D_HUMAN</a>  | 5 | 0.26 | 0.25 | 0.06 | 0.06 | 0.66  |
| 239 | 4697   | <b>NDUFA4</b>   | <a href="#">sp O00483 NDUA4_HUMAN</a>   | 1 | 0.17 | 0.17 | 0.06 | 0.06 | 0.72  |
| 240 | 23269  | <b>MGA</b>      | <a href="#">sp Q8IW19-2 MGAP_HUMAN</a>  | 2 | 0.22 | 0.21 | 0.06 | 0.06 | 0.34  |
| 241 | 5494   | <b>PPM1A</b>    | <a href="#">sp P35813-2 PPM1A_HUMAN</a> | 2 | 0.2  | 0.19 | 0.06 | 0.06 | -0.39 |
| 242 | 6628   | <b>SNRPB</b>    | <a href="#">sp P14678-2 RSMB_HUMAN</a>  | 4 | 0.24 | 0.23 | 0.06 | 0.06 | 0.08  |
| 243 | 3187   | <b>HNRNPH1</b>  | <a href="#">sp P31943 HNRH1_HUMAN</a>   | 6 | 0.28 | 0.27 | 0.06 | 0.06 | 0.51  |
| 244 | 10992  | <b>SF3B2</b>    | <a href="#">sp Q13435 SF3B2_HUMAN</a>   | 2 | 0.19 | 0.2  | 0.05 | 0.06 | 0.07  |
| 245 | 3190   | <b>HNRNPK</b>   | <a href="#">sp P61978-2 HNRPK_HUMAN</a> | 5 | 0.25 | 0.24 | 0.06 | 0.06 | -0.47 |
| 246 | 10944  | <b>C11orf58</b> | <a href="#">sp O00193 SMAP_HUMAN</a>    | 1 | 0.28 | 0.27 | 0.06 | 0.06 | 1.91  |
| 247 | 29920  | <b>PYCR2</b>    | <a href="#">sp Q96C36 P5CR2_HUMAN</a>   | 1 | 0.27 | 0.26 | 0.06 | 0.06 | 1.16  |
| 248 | 5685   | <b>PSMA4</b>    | <a href="#">sp P25789 PSA4_HUMAN</a>    | 2 | 0.2  | 0.19 | 0.06 | 0.06 | 0.44  |
| 249 | 5955   | <b>RCN2</b>     | <a href="#">sp Q14257 RCN2_HUMAN</a>    | 3 | 0.22 | 0.23 | 0.06 | 0.06 | 0.09  |
| 250 | 6632   | <b>SNRPD1</b>   | <a href="#">sp P62314 SMD1_HUMAN</a>    | 2 | 0.2  | 0.2  | 0.06 | 0.06 | 0.5   |
| 251 | 3396   | <b>ICT1</b>     | <a href="#">sp Q14197 ICT1_HUMAN</a>    | 1 | 0.28 | 0.27 | 0.06 | 0.06 | 0.66  |
| 252 | 1832   | <b>DSP</b>      | <a href="#">sp P15924-2 DESP_HUMAN</a>  | 1 | 0.23 | 0.24 | 0.05 | 0.06 | 0.3   |
| 253 | 7529   | <b>YWHAB</b>    | <a href="#">sp P31946-2 1433B_HUMAN</a> | 1 | 0.26 | 0.25 | 0.06 | 0.06 | 0.51  |
| 254 | 4144   | <b>MAT2A</b>    | <a href="#">sp P31153 METK2_HUMAN</a>   | 2 | 0.2  | 0.2  | 0.06 | 0.06 | 0.26  |
| 255 | 10238  | <b>DCAF7</b>    | <a href="#">sp P61962 DCAF7_HUMAN</a>   | 1 | 0.26 | 0.25 | 0.06 | 0.06 | 0.76  |
| 256 | 6726   | <b>SRP9</b>     | <a href="#">sp P49458 SRP09_HUMAN</a>   | 1 | 0.26 | 0.25 | 0.06 | 0.06 | 2.03  |
| 257 | 2923   | <b>PDIA3</b>    | <a href="#">sp P30101 PDIA3_HUMAN</a>   | 1 | 0.27 | 0.26 | 0.06 | 0.06 | 0.69  |
| 258 | 257397 | <b>TAB3</b>     | <a href="#">sp Q8N5C8-2 TAB3_HUMAN</a>  | 2 | 0.21 | 0.2  | 0.06 | 0.06 | 0.96  |
| 259 | 57003  | <b>CCDC47</b>   | <a href="#">sp Q96A33-2 CCD47_HUMAN</a> | 1 | 0.28 | 0.27 | 0.06 | 0.06 | 1.91  |
| 260 | 10972  | <b>TMED10</b>   | <a href="#">sp P49755 TMEDA_HUMAN</a>   | 1 | 0.27 | 0.26 | 0.06 | 0.06 | 1.61  |
| 261 | 10558  | <b>SPTLC1</b>   | <a href="#">sp O15269 SPTC1_HUMAN</a>   | 1 | 0.28 | 0.27 | 0.06 | 0.06 | 1.05  |
| 262 | 3843   | <b>IPO5</b>     | <a href="#">sp O00410-2 IPO5_HUMAN</a>  | 1 | 0.26 | 0.25 | 0.06 | 0.06 | 0.99  |
| 263 | 9276   | <b>COPB2</b>    | <a href="#">sp P35606 COPB2_HUMAN</a>   | 1 | 0.16 | 0.16 | 0.05 | 0.05 | -0.15 |
| 264 | 6176   | <b>RPLP1</b>    | <a href="#">sp P05386 RLA1_HUMAN</a>    | 1 | 0.16 | 0.15 | 0.05 | 0.05 | 0.55  |
| 265 | 10606  | <b>PAICS</b>    | <a href="#">sp P22234-2 PUR6_HUMAN</a>  | 1 | 0.15 | 0.15 | 0.05 | 0.05 | 0.38  |
| 266 | 9043   | <b>SPAG9</b>    | <a href="#">sp O60271-2 JIP4_HUMAN</a>  | 1 | 0.2  | 0.2  | 0.05 | 0.05 | 0.86  |
| 267 | 5700   | <b>PSMC1</b>    | <a href="#">sp P62191 PRS4_HUMAN</a>    | 3 | 0.22 | 0.21 | 0.05 | 0.05 | 0.41  |
| 268 | 5702   | <b>PSMC3</b>    | <a href="#">sp P17980 PRS6A_HUMAN</a>   | 3 | 0.21 | 0.2  | 0.05 | 0.05 | 0.08  |
| 269 | 8667   | <b>EIF3H</b>    | <a href="#">sp O15372 EIF3H_HUMAN</a>   | 2 | 0.18 | 0.17 | 0.05 | 0.05 | -0.42 |
| 270 | 821    | <b>CANX</b>     | <a href="#">sp P27824 CALX_HUMAN</a>    | 1 | 0.16 | 0.15 | 0.05 | 0.05 | 0.09  |
| 271 | 144455 | <b>E2F7</b>     | <a href="#">sp Q96AV8-2 E2F7_HUMAN</a>  | 1 | 0.16 | 0.15 | 0.05 | 0.05 | 0.19  |

|     |           |                  |                                         |   |      |      |      |      |       |
|-----|-----------|------------------|-----------------------------------------|---|------|------|------|------|-------|
| 272 | 2896      | <b>GRN</b>       | <a href="#">sp P28799-2 GRN_HUMAN</a>   | 1 | 0.22 | 0.21 | 0.05 | 0.05 | 0.68  |
| 273 | 54726     | <b>OTUD4</b>     | <a href="#">sp Q01804-3 OTUD4_HUMAN</a> | 2 | 0.19 | 0.18 | 0.05 | 0.05 | -0.49 |
| 274 | 293       | <b>SLC25A6</b>   | <a href="#">sp P12236 ADT3_HUMAN</a>    | 3 | 0.2  | 0.2  | 0.05 | 0.05 | -0.28 |
| 275 | 9349      | <b>RPL23</b>     | <a href="#">sp P62829 RL23_HUMAN</a>    | 4 | 0.23 | 0.22 | 0.05 | 0.05 | 0.48  |
| 276 | 8661      | <b>EIF3A</b>     | <a href="#">sp Q14152 EIF3A_HUMAN</a>   | 3 | 0.2  | 0.19 | 0.05 | 0.05 | -1.08 |
| 277 | 7453      | <b>WARS</b>      | <a href="#">sp P23381-2 SYWC_HUMAN</a>  | 2 | 0.19 | 0.18 | 0.05 | 0.05 | -0.03 |
| 278 | 47        | <b>ACLY</b>      | <a href="#">sp P53396 ACLY_HUMAN</a>    | 2 | 0.22 | 0.21 | 0.05 | 0.05 | 0.3   |
| 279 | 10857     | <b>PGRMC1</b>    | <a href="#">sp O00264 PGRC1_HUMAN</a>   | 1 | 0.24 | 0.24 | 0.05 | 0.05 | 0.6   |
| 280 | 6745      | <b>SSR1</b>      | <a href="#">sp P43307 SSRA_HUMAN</a>    | 2 | 0.2  | 0.19 | 0.05 | 0.05 | 1.25  |
| 281 | 9774      | <b>BCLAF1</b>    | <a href="#">sp Q9NYF8-2 BCLF1_HUMAN</a> | 3 | 0.21 | 0.21 | 0.05 | 0.05 | -0.56 |
| 282 | 1072      | <b>CFL1</b>      | <a href="#">sp P23528 COF1_HUMAN</a>    | 2 | 0.18 | 0.17 | 0.05 | 0.05 | 0.51  |
| 283 | 5635      | <b>PRPSAP1</b>   | <a href="#">sp Q14558-2 KPRA_HUMAN</a>  | 1 | 0.22 | 0.21 | 0.05 | 0.05 | 0.08  |
| 284 | 8663      | <b>EIF3C</b>     | <a href="#">sp Q99613 EIF3C_HUMAN</a>   | 4 | 0.24 | 0.23 | 0.05 | 0.05 | -0.57 |
| 285 | 6093      | <b>ROCK1</b>     | <a href="#">sp Q13464 ROCK1_HUMAN</a>   | 2 | 0.21 | 0.22 | 0.05 | 0.05 | -0.06 |
| 286 | 5717      | <b>PSMD11</b>    | <a href="#">sp O00231 PSD11_HUMAN</a>   | 3 | 0.21 | 0.2  | 0.05 | 0.05 | -0.26 |
| 287 | 5701      | <b>PSMC2</b>     | <a href="#">sp P35998 PRS7_HUMAN</a>    | 3 | 0.21 | 0.2  | 0.05 | 0.05 | -0.07 |
| 288 | 7314      | <b>UBB</b>       | <a href="#">sp P0CG47 UBB_HUMAN</a>     | 3 | 0.21 | 0.21 | 0.05 | 0.05 | 0.08  |
| 289 | 5538      | <b>PPT1</b>      | <a href="#">sp P50897 PPT1_HUMAN</a>    | 1 | 0.22 | 0.21 | 0.05 | 0.05 | 0.88  |
| 290 | 1933      | <b>EEF1B2</b>    | <a href="#">sp P24534 EF1B_HUMAN</a>    | 3 | 0.2  | 0.19 | 0.05 | 0.05 | -0.03 |
| 291 | 51386     | <b>EIF3L</b>     | <a href="#">sp Q9Y262 EIF3L_HUMAN</a>   | 4 | 0.24 | 0.23 | 0.05 | 0.05 | -0.68 |
| 292 | 2597      | <b>GAPDH</b>     | <a href="#">sp P04406 G3P_HUMAN</a>     | 3 | 0.22 | 0.21 | 0.05 | 0.05 | 0.37  |
| 293 | 3920      | <b>LAMP2</b>     | <a href="#">sp P13473-2 LAMP2_HUMAN</a> | 1 | 0.24 | 0.24 | 0.05 | 0.05 | 1.35  |
| 294 | 3276      | <b>PRMT1</b>     | <a href="#">sp Q99873-2 ANM1_HUMAN</a>  | 1 | 0.12 | 0.15 | 0.03 | 0.05 | -0.48 |
| 295 | 5718      | <b>PSMD12</b>    | <a href="#">sp O00232 PSD12_HUMAN</a>   | 3 | 0.21 | 0.2  | 0.05 | 0.05 | 0.21  |
| 296 | 26227     | <b>PHGDH</b>     | <a href="#">sp O43175 SERA_HUMAN</a>    | 3 | 0.21 | 0.2  | 0.05 | 0.05 | -0.08 |
| 297 | 8662      | <b>EIF3B</b>     | <a href="#">sp P55884-2 EIF3B_HUMAN</a> | 3 | 0.2  | 0.19 | 0.05 | 0.05 | -0.92 |
| 298 | TPM3L_HUM | <b>TPM3L_HUM</b> | <a href="#">sp A6NL28-2 TPM3L_HUMAN</a> | 1 | 0.22 | 0.21 | 0.05 | 0.05 | 1.32  |
| 299 | 34        | <b>ACADM</b>     | <a href="#">sp P11310-2 ACADM_HUMAN</a> | 1 | 0.23 | 0.22 | 0.05 | 0.05 | 1.02  |
| 300 | 213       | <b>ALB</b>       | <a href="#">sp P02768-2 ALBU_HUMAN</a>  | 1 | 0.24 | 0.24 | 0.05 | 0.05 | 1.16  |
| 301 | 10165     | <b>SLC25A13</b>  | <a href="#">sp Q9UJS0 CMC2_HUMAN</a>    | 1 | 0.2  | 0.2  | 0.05 | 0.05 | 0.23  |
| 302 | 7266      | <b>DNAJC7</b>    | <a href="#">sp Q99615 DNJC7_HUMAN</a>   | 1 | 0.23 | 0.23 | 0.05 | 0.05 | 0.26  |
| 303 | 5832      | <b>ALDH18A1</b>  | <a href="#">sp P54886-2 P5CS_HUMAN</a>  | 1 | 0.24 | 0.24 | 0.05 | 0.05 | 0.88  |
| 304 | 23107     | <b>MRPS27</b>    | <a href="#">sp Q92552 RT27_HUMAN</a>    | 1 | 0.2  | 0.2  | 0.05 | 0.05 | 0.87  |
| 305 | 2935      | <b>GSPT1</b>     | <a href="#">sp P15170 ERF3A_HUMAN</a>   | 1 | 0.21 | 0.2  | 0.05 | 0.05 | 1.4   |
| 306 | 27336     | <b>HTATSF1</b>   | <a href="#">sp O43719 HTSF1_HUMAN</a>   | 1 | 0.16 | 0.22 | 0.04 | 0.05 | -0.07 |
| 307 | 10181     | <b>RBM5</b>      | <a href="#">sp P52756 RBM5_HUMAN</a>    | 1 | 0.23 | 0.22 | 0.05 | 0.05 | 0.71  |
| 308 | 10189     | <b>THOC4</b>     | <a href="#">sp Q86V81 THOC4_HUMAN</a>   | 1 | 0.2  | 0.2  | 0.05 | 0.05 | 0.28  |
| 309 | 5495      | <b>PPM1B</b>     | <a href="#">sp O75688-2 PPM1B_HUMAN</a> | 3 | 0.21 | 0.21 | 0.05 | 0.05 | -0.8  |
| 310 | 10526     | <b>IPO8</b>      | <a href="#">sp O15397 IPO8_HUMAN</a>    | 2 | 0.18 | 0.18 | 0.05 | 0.05 | -0.52 |

|     |        |                 |                                         |   |      |      |      |      |       |
|-----|--------|-----------------|-----------------------------------------|---|------|------|------|------|-------|
| 311 | 4722   | <b>NDUFS3</b>   | <a href="#">sp O75489 NDUS3_HUMAN</a>   | 1 | 0.21 | 0.2  | 0.05 | 0.05 | 0.82  |
| 312 | 8520   | <b>HAT1</b>     | <a href="#">sp O14929-2 HAT1_HUMAN</a>  | 1 | 0.22 | 0.21 | 0.05 | 0.05 | 0.77  |
| 313 | 2017   | <b>CTTN</b>     | <a href="#">sp Q14247 SRC8_HUMAN</a>    | 1 | 0.24 | 0.24 | 0.05 | 0.05 | 1.03  |
| 314 | 1778   | <b>DYNC1H1</b>  | <a href="#">sp Q14204 DYHC1_HUMAN</a>   | 2 | 0.19 | 0.18 | 0.05 | 0.05 | -0.74 |
| 315 | 1984   | <b>EIF5A</b>    | <a href="#">sp P63241-2 IF5A1_HUMAN</a> | 1 | 0.16 | 0.15 | 0.05 | 0.05 | 0.09  |
| 316 | 1315   | <b>COPB1</b>    | <a href="#">sp P53618 COPB_HUMAN</a>    | 2 | 0.2  | 0.21 | 0.04 | 0.05 | 0.03  |
| 317 | 7407   | <b>VARS</b>     | <a href="#">sp P26640 SYVC_HUMAN</a>    | 2 | 0.18 | 0.18 | 0.05 | 0.05 | 0.32  |
| 318 | 5805   | <b>PTS</b>      | <a href="#">sp Q03393 PTPS_HUMAN</a>    | 2 | 0.18 | 0.18 | 0.05 | 0.05 | 0.75  |
| 319 | 1153   | <b>CIRBP</b>    | <a href="#">sp Q14011 CIRBP_HUMAN</a>   | 2 | 0.18 | 0.17 | 0.05 | 0.05 | 0.69  |
| 320 | 1434   | <b>CSE1L</b>    | <a href="#">sp P55060-3 XPO2_HUMAN</a>  | 1 | 0.2  | 0.2  | 0.05 | 0.05 | 0.51  |
| 321 | 506    | <b>ATP5B</b>    | <a href="#">sp P06576 ATPB_HUMAN</a>    | 3 | 0.2  | 0.2  | 0.05 | 0.05 | -0.36 |
| 322 | 154796 | <b>AMOT</b>     | <a href="#">sp Q4VCS5-2 AMOT_HUMAN</a>  | 1 | 0.24 | 0.24 | 0.05 | 0.05 | 1.22  |
| 323 | 5693   | <b>PSMB5</b>    | <a href="#">sp P28074 PSB5_HUMAN</a>    | 2 | 0.19 | 0.18 | 0.05 | 0.05 | 0.35  |
| 324 | 6633   | <b>SNRPD2</b>   | <a href="#">sp P62316 SMD2_HUMAN</a>    | 2 | 0.19 | 0.19 | 0.05 | 0.05 | 0.11  |
| 325 | 2584   | <b>GALK1</b>    | <a href="#">sp P51570 GALK1_HUMAN</a>   | 1 | 0.23 | 0.23 | 0.05 | 0.05 | 0.58  |
| 326 | 5162   | <b>PDHB</b>     | <a href="#">sp P11177-2 ODPB_HUMAN</a>  | 1 | 0.22 | 0.21 | 0.05 | 0.05 | 0.6   |
| 327 | 8802   | <b>SUCLG1</b>   | <a href="#">sp P53597 SUCA_HUMAN</a>    | 1 | 0.21 | 0.2  | 0.05 | 0.05 | 0.87  |
| 328 | 871    | <b>SERPINH1</b> | <a href="#">sp P50454 SERPH_HUMAN</a>   | 1 | 0.2  | 0.2  | 0.05 | 0.05 | 0.31  |
| 329 | 58477  | <b>SRPRB</b>    | <a href="#">sp Q9Y5M8 SRPRB_HUMAN</a>   | 1 | 0.23 | 0.23 | 0.05 | 0.05 | 1.03  |
| 330 | 51144  | <b>HSD17B12</b> | <a href="#">sp Q53GQ0 DHB12_HUMAN</a>   | 1 | 0.22 | 0.21 | 0.05 | 0.05 | 0.63  |
| 331 | 5520   | <b>PPP2R2A</b>  | <a href="#">sp P63151 2ABA_HUMAN</a>    | 1 | 0.23 | 0.22 | 0.05 | 0.05 | 1.36  |
| 332 | 11316  | <b>COPE</b>     | <a href="#">sp O14579 COPE_HUMAN</a>    | 1 | 0.22 | 0.21 | 0.05 | 0.05 | 0.97  |
| 333 | 9879   | <b>DDX46</b>    | <a href="#">sp Q7L014 DDX46_HUMAN</a>   | 1 | 0.22 | 0.21 | 0.05 | 0.05 | 1.19  |
| 334 | 7531   | <b>YWHAE</b>    | <a href="#">sp P62258-2 1433E_HUMAN</a> | 2 | 0.18 | 0.17 | 0.04 | 0.04 | -0.16 |
| 335 | 5052   | <b>PRDX1</b>    | <a href="#">sp Q06830 PRDX1_HUMAN</a>   | 2 | 0.16 | 0.16 | 0.04 | 0.04 | -0.87 |
| 336 | 6188   | <b>RPS3</b>     | <a href="#">sp P23396 RS3_HUMAN</a>     | 3 | 0.2  | 0.19 | 0.04 | 0.04 | -0.85 |
| 337 | 80086  | <b>TUBA4B</b>   | <a href="#">sp Q9H853 TBA4B_HUMAN</a>   | 2 | 0.19 | 0.18 | 0.04 | 0.04 | -0.11 |
| 338 | 10480  | <b>EIF3M</b>    | <a href="#">sp Q7L2H7 EIF3M_HUMAN</a>   | 2 | 0.18 | 0.17 | 0.04 | 0.04 | -0.58 |
| 339 | 10594  | <b>PRPF8</b>    | <a href="#">sp Q6P2Q9 PRP8_HUMAN</a>    | 2 | 0.17 | 0.17 | 0.04 | 0.04 | -0.55 |
| 340 | 6194   | <b>RPS6</b>     | <a href="#">sp P62753 RS6_HUMAN</a>     | 1 | 0.17 | 0.16 | 0.04 | 0.04 | 0.21  |
| 341 | 4637   | <b>MYL6</b>     | <a href="#">sp P60660-2 MYL6_HUMAN</a>  | 1 | 0.18 | 0.18 | 0.04 | 0.04 | 0.26  |
| 342 | 55291  | <b>PPP6R3</b>   | <a href="#">sp Q5H9R7-2 PP6R3_HUMAN</a> | 1 | 0.18 | 0.19 | 0.04 | 0.04 | 0.12  |
| 343 | 2969   | <b>GTF2I</b>    | <a href="#">sp P78347-2 GTF2I_HUMAN</a> | 1 | 0.17 | 0.17 | 0.04 | 0.04 | 0.29  |
| 344 | 4176   | <b>MCM7</b>     | <a href="#">sp P33993-2 MCM7_HUMAN</a>  | 1 | 0.17 | 0.16 | 0.04 | 0.04 | 0.29  |
| 345 | 9093   | <b>DNAJA3</b>   | <a href="#">sp Q96EY1-2 DNJA3_HUMAN</a> | 1 | 0.18 | 0.18 | 0.04 | 0.04 | 0.52  |
| 346 | 4673   | <b>NAP1L1</b>   | <a href="#">sp P55209 NP1L1_HUMAN</a>   | 2 | 0.18 | 0.17 | 0.04 | 0.04 | 0.71  |
| 347 | 6647   | <b>SOD1</b>     | <a href="#">sp P00441 SODC_HUMAN</a>    | 1 | 0.19 | 0.19 | 0.04 | 0.04 | 0.89  |
| 348 | 4052   | <b>LTBP1</b>    | <a href="#">sp Q14766-4 LTBP1_HUMAN</a> | 1 | 0.14 | 0.13 | 0.04 | 0.04 | -0.7  |
| 349 | 7534   | <b>YWHAZ</b>    | <a href="#">sp P63104 1433Z_HUMAN</a>   | 2 | 0.18 | 0.17 | 0.04 | 0.04 | 0.07  |



|     |        |                 |                                         |   |      |      |      |      |       |
|-----|--------|-----------------|-----------------------------------------|---|------|------|------|------|-------|
| 350 | 83473  | <b>KATNAL2</b>  | <a href="#">sp Q8IYT4-2 KATL2_HUMAN</a> | 1 | 0.18 | 0.18 | 0.04 | 0.04 | 0.29  |
| 351 | 498    | <b>ATP5A1</b>   | <a href="#">sp P25705 ATPA_HUMAN</a>    | 2 | 0.16 | 0.16 | 0.04 | 0.04 | -0.97 |
| 352 | 5566   | <b>PRKACA</b>   | <a href="#">sp P17612-2 KAPCA_HUMAN</a> | 1 | 0.2  | 0.19 | 0.04 | 0.04 | 1.45  |
| 353 | 6210   | <b>RPS15A</b>   | <a href="#">sp P62244 RS15A_HUMAN</a>   | 1 | 0.19 | 0.18 | 0.04 | 0.04 | 0.54  |
| 354 | 5705   | <b>PSMC5</b>    | <a href="#">sp P62195 PRS8_HUMAN</a>    | 2 | 0.17 | 0.16 | 0.04 | 0.04 | -0.4  |
| 355 | 3178   | <b>HNRNPA1</b>  | <a href="#">sp P09651-2 ROA1_HUMAN</a>  | 2 | 0.17 | 0.17 | 0.04 | 0.04 | 0.39  |
| 356 | 6181   | <b>RPLP2</b>    | <a href="#">sp P05387 RLA2_HUMAN</a>    | 1 | 0.14 | 0.13 | 0.04 | 0.04 | -0.11 |
| 357 | 92609  | <b>TIMM50</b>   | <a href="#">sp Q3ZCQ8-2 TIM50_HUMAN</a> | 1 | 0.17 | 0.16 | 0.04 | 0.04 | 0.07  |
| 358 | 8668   | <b>EIF3I</b>    | <a href="#">sp Q13347 EIF3I_HUMAN</a>   | 2 | 0.17 | 0.16 | 0.04 | 0.04 | -0.85 |
| 359 | 9343   | <b>EFTUD2</b>   | <a href="#">sp Q15029 U5S1_HUMAN</a>    | 2 | 0.17 | 0.16 | 0.04 | 0.04 | -0.32 |
| 360 | 832    | <b>CAPZB</b>    | <a href="#">sp P47756-2 CAPZB_HUMAN</a> | 1 | 0.15 | 0.17 | 0.03 | 0.04 | 0.06  |
| 361 | 57683  | <b>ZDBF2</b>    | <a href="#">sp Q9HCK1 ZDBF2_HUMAN</a>   | 1 | 0.2  | 0.19 | 0.04 | 0.04 | 0.38  |
| 362 | 3028   | <b>HSD17B10</b> | <a href="#">sp Q99714-2 HCD2_HUMAN</a>  | 1 | 0.15 | 0.18 | 0.03 | 0.04 | -0.3  |
| 363 | 103910 | <b>MYL12B</b>   | <a href="#">sp O14950 ML12B_HUMAN</a>   | 1 | 0.13 | 0.13 | 0.04 | 0.04 | 0.02  |
| 364 | 85313  | <b>PPIL4</b>    | <a href="#">sp Q8WUA2 PPIL4_HUMAN</a>   | 1 | 0.17 | 0.16 | 0.04 | 0.04 | 0.33  |
| 365 | 204    | <b>AK2</b>      | <a href="#">sp P54819-2 KAD2_HUMAN</a>  | 1 | 0.17 | 0.17 | 0.04 | 0.04 | 0.72  |
| 366 | 989    | <b>7-Sep</b>    | <a href="#">sp Q16181-2 SEPT7_HUMAN</a> | 1 | 0.17 | 0.17 | 0.04 | 0.04 | 0.49  |
| 367 | 1738   | <b>DLD</b>      | <a href="#">sp P09622 DLDH_HUMAN</a>    | 1 | 0.18 | 0.17 | 0.04 | 0.04 | 1.24  |
| 368 | 10971  | <b>YWHAQ</b>    | <a href="#">sp P27348 1433T_HUMAN</a>   | 1 | 0.14 | 0.13 | 0.04 | 0.04 | -0.38 |
| 369 | 10075  | <b>HUWE1</b>    | <a href="#">sp Q7Z6Z7-2 HUWE1_HUMAN</a> | 2 | 0.18 | 0.17 | 0.04 | 0.04 | -0.18 |
| 370 | 7273   | <b>TTN</b>      | <a href="#">sp Q8WZ42-2 TITIN_HUMAN</a> | 2 | 0.2  | 0.19 | 0.04 | 0.04 | 0.98  |
| 371 | 5518   | <b>PPP2R1A</b>  | <a href="#">sp P30153 2AAA_HUMAN</a>    | 1 | 0.17 | 0.16 | 0.04 | 0.04 | 0.27  |
| 372 | 3945   | <b>LDHB</b>     | <a href="#">sp P07195 LDHB_HUMAN</a>    | 2 | 0.17 | 0.17 | 0.04 | 0.04 | 0.03  |
| 373 | 7532   | <b>YWHAG</b>    | <a href="#">sp P61981 1433G_HUMAN</a>   | 1 | 0.17 | 0.16 | 0.04 | 0.04 | 0.13  |
| 374 | 6767   | <b>ST13</b>     | <a href="#">sp P50502 F10A1_HUMAN</a>   | 1 | 0.18 | 0.17 | 0.04 | 0.04 | 0.55  |
| 375 | 8664   | <b>EIF3D</b>    | <a href="#">sp O15371 EIF3D_HUMAN</a>   | 2 | 0.17 | 0.16 | 0.04 | 0.04 | -0.77 |
| 376 | 4670   | <b>HNRNPM</b>   | <a href="#">sp P52272-2 HNRPM_HUMAN</a> | 1 | 0.19 | 0.18 | 0.04 | 0.04 | 0.2   |
| 377 | 1476   | <b>CSTB</b>     | <a href="#">sp P04080 CYTB_HUMAN</a>    | 1 | 0.19 | 0.19 | 0.04 | 0.04 | 1.4   |
| 378 | 3336   | <b>HSPE1</b>    | <a href="#">sp P61604 CH10_HUMAN</a>    | 1 | 0.17 | 0.16 | 0.04 | 0.04 | 0.53  |
| 379 | 7167   | <b>TPI1</b>     | <a href="#">sp P60174-2 TPIS_HUMAN</a>  | 1 | 0.19 | 0.19 | 0.04 | 0.04 | 0.14  |
| 380 | 54994  | <b>C20orf11</b> | <a href="#">sp Q9NWU2 CT011_HUMAN</a>   | 1 | 0.18 | 0.17 | 0.04 | 0.04 | 0.23  |
| 381 | 11171  | <b>STRAP</b>    | <a href="#">sp Q9Y3F4 STRAP_HUMAN</a>   | 1 | 0.18 | 0.17 | 0.04 | 0.04 | 0.47  |
| 382 | 7317   | <b>UBA1</b>     | <a href="#">sp P22314 UBA1_HUMAN</a>    | 1 | 0.15 | 0.16 | 0.03 | 0.04 | -0.15 |
| 383 | 2130   | <b>EWSR1</b>    | <a href="#">sp Q01844-2 EWS_HUMAN</a>   | 1 | 0.19 | 0.18 | 0.04 | 0.04 | 1.21  |
| 384 | 3921   | <b>RPSA</b>     | <a href="#">sp P08865 RSSA_HUMAN</a>    | 1 | 0.14 | 0.13 | 0.04 | 0.04 | -0.36 |
| 385 | 9733   | <b>SART3</b>    | <a href="#">sp Q15020 SART3_HUMAN</a>   | 1 | 0.19 | 0.18 | 0.04 | 0.04 | 0.61  |
| 386 | 10963  | <b>STIP1</b>    | <a href="#">sp P31948 STIP1_HUMAN</a>   | 1 | 0.2  | 0.19 | 0.04 | 0.04 | 0.28  |
| 387 | 84844  | <b>PHF5A</b>    | <a href="#">sp Q7RTV0 PHF5A_HUMAN</a>   | 1 | 0.16 | 0.16 | 0.04 | 0.04 | 0.44  |
| 388 | 6208   | <b>RPS14</b>    | <a href="#">sp P62263 RS14_HUMAN</a>    | 1 | 0.14 | 0.13 | 0.04 | 0.04 | -0.17 |

|     |        |                 |                                         |   |      |      |      |      |       |
|-----|--------|-----------------|-----------------------------------------|---|------|------|------|------|-------|
| 389 | 4171   | <b>MCM2</b>     | <a href="#">sp P49736 MCM2_HUMAN</a>    | 1 | 0.17 | 0.16 | 0.04 | 0.04 | 0.07  |
| 390 | 4172   | <b>MCM3</b>     | <a href="#">sp P25205 MCM3_HUMAN</a>    | 1 | 0.18 | 0.18 | 0.04 | 0.04 | -0.02 |
| 391 | 92597  | <b>MOBK1A</b>   | <a href="#">sp Q7L9L4 MOL1A_HUMAN</a>   | 1 | 0.18 | 0.17 | 0.04 | 0.04 | 0.89  |
| 392 | 3030   | <b>HADHA</b>    | <a href="#">sp P40939 ECHA_HUMAN</a>    | 1 | 0.18 | 0.18 | 0.04 | 0.04 | -0.05 |
| 393 | 4841   | <b>NONO</b>     | <a href="#">sp Q15233 NONO_HUMAN</a>    | 1 | 0.14 | 0.14 | 0.04 | 0.04 | 0.02  |
| 394 | 8665   | <b>EIF3F</b>    | <a href="#">sp O00303 EIF3F_HUMAN</a>   | 2 | 0.17 | 0.16 | 0.04 | 0.04 | -0.73 |
| 395 | 4853   | <b>NOTCH2</b>   | <a href="#">sp Q04721 NOTC2_HUMAN</a>   | 1 | 0.17 | 0.16 | 0.04 | 0.04 | 0.01  |
| 396 | 1152   | <b>CKB</b>      | <a href="#">sp P12277 KCRB_HUMAN</a>    | 1 | 0.15 | 0.16 | 0.03 | 0.04 | -0.13 |
| 397 | 6418   | <b>SET</b>      | <a href="#">sp Q01105-2 SET_HUMAN</a>   | 1 | 0.15 | 0.14 | 0.04 | 0.04 | 0.04  |
| 398 | 9958   | <b>USP15</b>    | <a href="#">sp Q9Y4E8-2 UBP15_HUMAN</a> | 1 | 0.14 | 0.13 | 0.04 | 0.04 | -0.67 |
| 399 | 8570   | <b>KHSRP</b>    | <a href="#">sp Q92945-2 FUBP2_HUMAN</a> | 1 | 0.17 | 0.17 | 0.04 | 0.04 | -0.07 |
| 400 | 139324 | <b>HDX</b>      | <a href="#">sp Q7Z353-2 HDX_HUMAN</a>   | 1 | 0.17 | 0.17 | 0.04 | 0.04 | 0.11  |
| 401 | 10801  | <b>9-Sep</b>    | <a href="#">sp Q9UHD8-2 SEPT9_HUMAN</a> | 1 | 0.16 | 0.16 | 0.04 | 0.04 | 0.39  |
| 402 | 509    | <b>ATP5C1</b>   | <a href="#">sp P36542-2 ATPG_HUMAN</a>  | 1 | 0.17 | 0.16 | 0.04 | 0.04 | 0.38  |
| 403 | 5110   | <b>PCMT1</b>    | <a href="#">sp P22061-2 PIMT_HUMAN</a>  | 1 | 0.14 | 0.13 | 0.04 | 0.04 | 0.16  |
| 404 | 9532   | <b>BAG2</b>     | <a href="#">sp O95816 BAG2_HUMAN</a>    | 1 | 0.16 | 0.15 | 0.04 | 0.04 | 0.04  |
| 405 | 4735   | <b>2-Sep</b>    | <a href="#">sp Q15019-2 SEPT2_HUMAN</a> | 1 | 0.15 | 0.14 | 0.04 | 0.04 | 0.04  |
| 406 | 5589   | <b>PRKCSH</b>   | <a href="#">sp P14314 GLU2B_HUMAN</a>   | 1 | 0.17 | 0.16 | 0.04 | 0.04 | 0.33  |
| 407 | 79861  | <b>TUBAL3</b>   | <a href="#">sp A6NHL2-2 TBAL3_HUMAN</a> | 1 | 0.15 | 0.14 | 0.04 | 0.04 | -0.23 |
| 408 | 6189   | <b>RPS3A</b>    | <a href="#">sp P61247 RS3A_HUMAN</a>    | 1 | 0.17 | 0.16 | 0.04 | 0.04 | -0.06 |
| 409 | 54814  | <b>QPCTL</b>    | <a href="#">sp Q9NXS2 QPCTL_HUMAN</a>   | 1 | 0.19 | 0.19 | 0.04 | 0.04 | 1.03  |
| 410 | 5683   | <b>PSMA2</b>    | <a href="#">sp P25787 PSA2_HUMAN</a>    | 1 | 0.14 | 0.14 | 0.04 | 0.04 | -0.04 |
| 411 | 9918   | <b>NCAPD2</b>   | <a href="#">sp Q15021 CND1_HUMAN</a>    | 1 | 0.18 | 0.18 | 0.04 | 0.04 | 0.6   |
| 412 | 6204   | <b>RPS10</b>    | <a href="#">sp P46783 RS10_HUMAN</a>    | 1 | 0.13 | 0.13 | 0.03 | 0.03 | -0.17 |
| 413 | 9126   | <b>SMC3</b>     | <a href="#">sp Q9UQE7 SMC3_HUMAN</a>    | 1 | 0.13 | 0.13 | 0.03 | 0.03 | -0.41 |
| 414 | 5689   | <b>PSMB1</b>    | <a href="#">sp P20618 PSB1_HUMAN</a>    | 1 | 0.13 | 0.12 | 0.03 | 0.03 | -0.4  |
| 415 | 5687   | <b>PSMA6</b>    | <a href="#">sp P60900 PSA6_HUMAN</a>    | 1 | 0.14 | 0.14 | 0.03 | 0.03 | 0.13  |
| 416 | 5688   | <b>PSMA7</b>    | <a href="#">sp O14818-2 PSA7_HUMAN</a>  | 1 | 0.12 | 0.12 | 0.03 | 0.03 | -0.51 |
| 417 | 5706   | <b>PSMC6</b>    | <a href="#">sp P62333 PRS10_HUMAN</a>   | 1 | 0.12 | 0.12 | 0.03 | 0.03 | -0.83 |
| 418 | 10121  | <b>ACTR1A</b>   | <a href="#">sp P61163 ACTZ_HUMAN</a>    | 1 | 0.12 | 0.15 | 0.03 | 0.03 | -0.39 |
| 419 | 1639   | <b>DCTN1</b>    | <a href="#">sp Q14203-2 DCTN1_HUMAN</a> | 1 | 0.13 | 0.12 | 0.03 | 0.03 | -0.67 |
| 420 | 57459  | <b>GATAD2B</b>  | <a href="#">sp Q8WXI9 P66B_HUMAN</a>    | 1 | 0.15 | 0.15 | 0.03 | 0.03 | 0.07  |
| 421 | 2618   | <b>GART</b>     | <a href="#">sp P22102 PUR2_HUMAN</a>    | 1 | 0.13 | 0.13 | 0.03 | 0.03 | -0.26 |
| 422 | 829    | <b>CAPZA1</b>   | <a href="#">sp P52907 CAZA1_HUMAN</a>   | 1 | 0.14 | 0.14 | 0.03 | 0.03 | -0.07 |
| 423 | 23020  | <b>SNRNP200</b> | <a href="#">sp O75643 U520_HUMAN</a>    | 1 | 0.12 | 0.12 | 0.03 | 0.03 | -1.04 |
| 424 | 27335  | <b>EIF3K</b>    | <a href="#">sp Q9UBQ5 EIF3K_HUMAN</a>   | 1 | 0.13 | 0.13 | 0.03 | 0.03 | -0.36 |
| 425 | 55352  | <b>C17orf79</b> | <a href="#">sp Q9NQ92 COPR5_HUMAN</a>   | 1 | 0.13 | 0.13 | 0.03 | 0.03 | -0.49 |
| 426 | 4691   | <b>NCL</b>      | <a href="#">sp P19338 NUCL_HUMAN</a>    | 1 | 0.12 | 0.12 | 0.03 | 0.03 | -0.61 |
| 427 | 7175   | <b>TPR</b>      | <a href="#">sp P12270 TPR_HUMAN</a>     | 1 | 0.13 | 0.13 | 0.03 | 0.03 | -0.32 |

|     |           |                  |                                         |   |      |      |      |      |       |
|-----|-----------|------------------|-----------------------------------------|---|------|------|------|------|-------|
| 428 | 9861      | <b>PSMD6</b>     | <a href="#">sp Q15008 PSMD6_HUMAN</a>   | 1 | 0.13 | 0.13 | 0.03 | 0.03 | -0.22 |
| 429 | 2521      | <b>FUS</b>       | <a href="#">sp P35637-2 FUS_HUMAN</a>   | 1 | 0.12 | 0.12 | 0.03 | 0.03 | -0.68 |
| 430 | 7284      | <b>TUFM</b>      | <a href="#">sp P49411 EFTU_HUMAN</a>    | 1 | 0.14 | 0.14 | 0.03 | 0.03 | -0.43 |
| 431 | 51520     | <b>LARS</b>      | <a href="#">sp Q9P2J5 SYLC_HUMAN</a>    | 1 | 0.12 | 0.12 | 0.03 | 0.03 | -0.86 |
| 432 | 51639     | <b>SF3B14</b>    | <a href="#">sp Q9Y3B4 PM14_HUMAN</a>    | 1 | 0.13 | 0.13 | 0.03 | 0.03 | 0.16  |
| 433 | 3856      | <b>KRT8</b>      | <a href="#">sp P05787 K2C8_HUMAN</a>    | 1 | 0.12 | 0.12 | 0.03 | 0.03 | -0.27 |
| 434 | 6737      | <b>TRIM21</b>    | <a href="#">sp P19474 RO52_HUMAN</a>    | 1 | 0.12 | 0.12 | 0.03 | 0.03 | -0.86 |
| 435 | 220988    | <b>HNRNPA3</b>   | <a href="#">sp P51991-2 ROA3_HUMAN</a>  | 1 | 0.14 | 0.14 | 0.03 | 0.03 | 0.23  |
| 436 | 8666      | <b>EIF3G</b>     | <a href="#">sp O75821 EIF3G_HUMAN</a>   | 1 | 0.12 | 0.11 | 0.03 | 0.03 | -1.04 |
| 437 | 6627      | <b>SNRPA1</b>    | <a href="#">sp P09661 RU2A_HUMAN</a>    | 1 | 0.14 | 0.14 | 0.03 | 0.03 | 0.23  |
| 438 | 4869      | <b>NPM1</b>      | <a href="#">sp P06748-2 NPM_HUMAN</a>   | 1 | 0.13 | 0.13 | 0.03 | 0.03 | -0.34 |
| 439 | 10051     | <b>SMC4</b>      | <a href="#">sp Q9NTJ3 SMC4_HUMAN</a>    | 1 | 0.13 | 0.13 | 0.03 | 0.03 | -0.05 |
| 440 | 10291     | <b>SF3A1</b>     | <a href="#">sp Q15459 SF3A1_HUMAN</a>   | 1 | 0.15 | 0.14 | 0.03 | 0.03 | 0.13  |
| 441 | 4678      | <b>NASP</b>      | <a href="#">sp P49321-3 NASP_HUMAN</a>  | 1 | 0.14 | 0.13 | 0.03 | 0.03 | 0.02  |
| 442 | 7295      | <b>TXN</b>       | <a href="#">sp P10599 THIO_HUMAN</a>    | 1 | 0.12 | 0.11 | 0.03 | 0.03 | -0.96 |
| 443 | 5719      | <b>PSMD13</b>    | <a href="#">sp Q9UNM6-2 PSD13_HUMAN</a> | 1 | 0.13 | 0.13 | 0.03 | 0.03 | -0.23 |
| 444 | 5216      | <b>PFN1</b>      | <a href="#">sp P07737 PROF1_HUMAN</a>   | 1 | 0.15 | 0.15 | 0.03 | 0.03 | 0.04  |
| 445 | 4131      | <b>MAP1B</b>     | <a href="#">sp P46821 MAP1B_HUMAN</a>   | 1 | 0.12 | 0.12 | 0.03 | 0.03 | -0.91 |
| 446 | 5928      | <b>RBBP4</b>     | <a href="#">sp Q09028-2 RBBP4_HUMAN</a> | 1 | 0.13 | 0.12 | 0.03 | 0.03 | -0.6  |
| 447 | 3799      | <b>KIF5B</b>     | <a href="#">sp P33176 KINH_HUMAN</a>    | 1 | 0.15 | 0.15 | 0.03 | 0.03 | 0.01  |
| 448 | 10856     | <b>RUVBL2</b>    | <a href="#">sp Q9Y230 RUVB2_HUMAN</a>   | 1 | 0.12 | 0.12 | 0.03 | 0.03 | -0.6  |
| 449 | 6187      | <b>RPS2</b>      | <a href="#">sp P15880 RS2_HUMAN</a>     | 1 | 0.12 | 0.13 | 0.03 | 0.03 | -0.42 |
| 450 | 6634      | <b>SNRPD3</b>    | <a href="#">sp P62318 SMD3_HUMAN</a>    | 1 | 0.12 | 0.12 | 0.03 | 0.03 | -0.27 |
| 451 | 5250      | <b>SLC25A3</b>   | <a href="#">sp Q00325-2 MPCP_HUMAN</a>  | 1 | 0.12 | 0.12 | 0.03 | 0.03 | -0.41 |
| 452 | 23122     | <b>CLASP2</b>    | <a href="#">sp O75122 CLAP2_HUMAN</a>   | 1 | 0.13 | 0.13 | 0.03 | 0.03 | -0.71 |
| 453 | 8335      | <b>HIST1H2AB</b> | <a href="#">sp P04908 H2A1B_HUMAN</a>   | 1 | 0.14 | 0.13 | 0.03 | 0.03 | -0.26 |
| 454 | 6874      | <b>TAF4</b>      | <a href="#">sp O00268 TAF4_HUMAN</a>    | 1 | 0.14 | 0.14 | 0.03 | 0.03 | -0.63 |
| 455 | 10935     | <b>PRDX3</b>     | <a href="#">sp P30048 PRDX3_HUMAN</a>   | 1 | 0.15 | 0.14 | 0.03 | 0.03 | -0.15 |
| 456 | 134147    | <b>CMBL</b>      | <a href="#">sp Q96DG6 CMBL_HUMAN</a>    | 1 | 0.12 | 0.11 | 0.03 | 0.03 | -1.11 |
| 457 | 6234      | <b>RPS28</b>     | <a href="#">sp P62857 RS28_HUMAN</a>    | 1 | 0.12 | 0.12 | 0.03 | 0.03 | -0.36 |
| 458 | 3184      | <b>HNRNPD</b>    | <a href="#">sp Q14103-2 HNRPD_HUMAN</a> | 1 | 0.13 | 0.12 | 0.03 | 0.03 | -0.5  |
| 459 | 26135     | <b>SERBP1</b>    | <a href="#">sp Q8NC51-2 PAIRB_HUMAN</a> | 1 | 0.12 | 0.12 | 0.03 | 0.03 | -0.15 |
| 460 | 5708      | <b>PSMD2</b>     | <a href="#">sp Q13200 PSMD2_HUMAN</a>   | 1 | 0.13 | 0.12 | 0.03 | 0.03 | -0.7  |
| 461 | 5691      | <b>PSMB3</b>     | <a href="#">sp P49720 PSB3_HUMAN</a>    | 1 | 0.13 | 0.13 | 0.03 | 0.03 | 0.05  |
| 462 | 6421      | <b>SFPQ</b>      | <a href="#">sp P23246 SFPQ_HUMAN</a>    | 1 | 0.12 | 0.12 | 0.03 | 0.03 | -0.22 |
| 463 | KV201_HUM | <b>KV201_HUM</b> | <a href="#">sp P01614 KV201_HUMAN</a>   | 1 | 0.15 | 0.14 | 0.03 | 0.03 | 0.71  |
| 464 | 1973      | <b>EIF4A1</b>    | <a href="#">sp P60842 IF4A1_HUMAN</a>   | 1 | 0.15 | 0.14 | 0.03 | 0.03 | -0.11 |
| 465 | 6637      | <b>SNRPG</b>     | <a href="#">sp A8MWD9 RUXGL_HUMAN</a>   | 1 | 0.15 | 0.14 | 0.03 | 0.03 | 0.25  |
| 466 | 6636      | <b>SNRPF</b>     | <a href="#">sp P62306 RUXF_HUMAN</a>    | 1 | 0.15 | 0.14 | 0.03 | 0.03 | 0.54  |

|     |       |                |                                        |   |      |      |      |      |       |
|-----|-------|----------------|----------------------------------------|---|------|------|------|------|-------|
| 467 | 5709  | <b>PSMD3</b>   | <a href="#">sp O43242 PSMD3_HUMAN</a>  | 1 | 0.12 | 0.12 | 0.03 | 0.03 | -0.71 |
| 468 | 5686  | <b>PSMA5</b>   | <a href="#">sp P28066 PSA5_HUMAN</a>   | 1 | 0.13 | 0.13 | 0.03 | 0.03 | -0.24 |
| 469 | 57606 | <b>SLAIN2</b>  | <a href="#">sp Q9P270 SLAI2_HUMAN</a>  | 1 | 0.14 | 0.14 | 0.03 | 0.03 | -0.22 |
| 470 | 6232  | <b>RPS27</b>   | <a href="#">sp P42677 RS27_HUMAN</a>   | 1 | 0.15 | 0.14 | 0.03 | 0.03 | -0.02 |
| 471 | 23318 | <b>ZCCHC11</b> | <a href="#">sp Q5TAX3-2 TUT4_HUMAN</a> | 1 | 0.15 | 0.15 | 0.03 | 0.03 | 0.68  |
| 472 | 1654  | <b>DDX3X</b>   | <a href="#">sp O00571 DDX3X_HUMAN</a>  | 1 | 0.12 | 0.12 | 0.03 | 0.03 | -0.36 |
| 473 | 5682  | <b>PSMA1</b>   | <a href="#">sp P25786-2 PSA1_HUMAN</a> | 1 | 0.15 | 0.14 | 0.03 | 0.03 | 0.41  |
| 474 | 1213  | <b>CLTC</b>    | <a href="#">sp Q00610-2 CLH1_HUMAN</a> | 1 | 0.12 | 0.12 | 0.03 | 0.03 | -0.89 |
| 475 | 3646  | <b>EIF3E</b>   | <a href="#">sp P60228 EIF3E_HUMAN</a>  | 1 | 0.12 | 0.12 | 0.03 | 0.03 | -1.11 |
| 476 | 23451 | <b>SF3B1</b>   | <a href="#">sp O75533 SF3B1_HUMAN</a>  | 1 | 0.12 | 0.12 | 0.03 | 0.03 | -0.75 |
| 477 | 5713  | <b>PSMD7</b>   | <a href="#">sp P51665 PSD7_HUMAN</a>   | 1 | 0.13 | 0.12 | 0.03 | 0.03 | -0.32 |
| 478 | 4173  | <b>MCM4</b>    | <a href="#">sp P33991 MCM4_HUMAN</a>   | 1 | 0.16 | 0.15 | 0.03 | 0.03 | 0.09  |
| 479 | 9219  | <b>MTA2</b>    | <a href="#">sp O94776 MTA2_HUMAN</a>   | 1 | 0.13 | 0.13 | 0.03 | 0.03 | -0.32 |
| 480 | 5692  | <b>PSMB4</b>   | <a href="#">sp P28070 PSB4_HUMAN</a>   | 1 | 0.13 | 0.13 | 0.03 | 0.03 | 0.02  |
| 481 | 5478  | <b>PPIA</b>    | <a href="#">sp P62937 PPIA_HUMAN</a>   | 1 | 0.12 | 0.11 | 0.03 | 0.03 | -0.49 |
| 482 | 142   | <b>PARP1</b>   | <a href="#">sp P09874 PARP1_HUMAN</a>  | 1 | 0.16 | 0.15 | 0.03 | 0.03 | -0.07 |
| 483 | 3735  | <b>KARS</b>    | <a href="#">sp Q15046-2 SYK_HUMAN</a>  | 1 | 0.13 | 0.13 | 0.03 | 0.03 | -0.3  |
| 484 | 8607  | <b>RUVBL1</b>  | <a href="#">sp Q9Y265 RUVB1_HUMAN</a>  | 1 | 0.13 | 0.12 | 0.03 | 0.03 | -0.48 |

|    | GeneID | Symbol    | Database ID                             | Ave.APSM | S <sup>N</sup> _Score | WS <sup>N</sup> _Score | D <sup>N</sup> _Score | WD <sup>N</sup> _Score | Z_score |
|----|--------|-----------|-----------------------------------------|----------|-----------------------|------------------------|-----------------------|------------------------|---------|
| 1  | 84315  | MON1A     | <a href="#">sp Q86VX9 MON1A_HUMAN</a>   | 100      | 8.5                   | 8.16                   | 14.14                 | 14.14                  | 7.42    |
| 2  | 51622  | CCZ1      | <a href="#">sp P86790 CCZ1L_HUMAN</a>   | 22       | 3.99                  | 3.83                   | 6.63                  | 6.63                   | 7.43    |
| 3  | 2289   | FKBP5     | <a href="#">sp Q13451 FKBP5_HUMAN</a>   | 18       | 3.61                  | 3.46                   | 6                     | 6                      | 7.43    |
| 4  | 29919  | C18orf8   | <a href="#">sp Q96DM3 MIC1_HUMAN</a>    | 10       | 2.69                  | 2.58                   | 4.47                  | 4.47                   | 7.44    |
| 5  | 3323   | HSP90AA4P | <a href="#">sp Q58FG1 HS904_HUMAN</a>   | 5        | 1.9                   | 1.82                   | 3.16                  | 3.16                   | 7.44    |
| 6  | 664618 | HSP90AB4P | <a href="#">sp Q58FF6 H90B4_HUMAN</a>   | 4        | 1.7                   | 1.63                   | 2.83                  | 2.83                   | 7.42    |
| 7  | 9209   | LRRFIP2   | <a href="#">sp Q9Y608-2 LRRF2_HUMAN</a> | 1        | 0.85                  | 0.82                   | 1.41                  | 1.41                   | 7.54    |
| 8  | 81704  | DOCK8     | <a href="#">sp Q8NF50-2 DOCK8_HUMAN</a> | 1        | 0.85                  | 0.82                   | 1.41                  | 1.41                   | 7.54    |
| 9  | 116113 | FOXP4     | <a href="#">sp Q8IVH2 FOXP4_HUMAN</a>   | 1        | 0.85                  | 0.82                   | 1.41                  | 1.41                   | 7.54    |
| 10 | 57819  | LSM2      | <a href="#">sp Q9Y333 LSM2_HUMAN</a>    | 1        | 0.85                  | 0.82                   | 1.41                  | 1.41                   | 7.54    |
| 11 | 55869  | HDAC8     | <a href="#">sp Q9BY41-2 HDAC8_HUMAN</a> | 1        | 0.6                   | 0.58                   | 0.71                  | 0.71                   | 3.28    |
| 12 | 25831  | HECTD1    | <a href="#">sp Q9ULT8 HECD1_HUMAN</a>   | 1        | 0.6                   | 0.58                   | 0.71                  | 0.71                   | 5.05    |
| 13 | 84263  | HSDL2     | <a href="#">sp Q6YN16-2 HSDL2_HUMAN</a> | 3        | 0.74                  | 0.71                   | 0.61                  | 0.61                   | 6.42    |
| 14 | 5536   | PPP5C     | <a href="#">sp P53041 PPP5_HUMAN</a>    | 2        | 0.6                   | 0.58                   | 0.5                   | 0.5                    | 5.62    |
| 15 | 9529   | BAG5      | <a href="#">sp Q9UL15-2 BAG5_HUMAN</a>  | 2        | 0.6                   | 0.58                   | 0.5                   | 0.5                    | 5.62    |
| 16 | 6279   | S100A8    | <a href="#">sp P05109 S10A8_HUMAN</a>   | 1        | 0.49                  | 0.47                   | 0.47                  | 0.47                   | 4.13    |
| 17 | 79868  | ALG13     | <a href="#">sp Q9NP73-3 ALG13_HUMAN</a> | 5        | 0.72                  | 0.69                   | 0.45                  | 0.45                   | 5.96    |
| 18 | 9500   | MAGED1    | <a href="#">sp Q9Y5V3-2 MAGD1_HUMAN</a> | 2        | 0.54                  | 0.52                   | 0.4                   | 0.4                    | 3.58    |
| 19 | 10910  | SUGT1     | <a href="#">sp Q9Y2Z0-2 SUGT1_HUMAN</a> | 2        | 0.54                  | 0.52                   | 0.4                   | 0.4                    | 2.45    |
| 20 | 54039  | PCBP3     | <a href="#">sp P57721-2 PCBP3_HUMAN</a> | 2        | 0.49                  | 0.47                   | 0.33                  | 0.33                   | 4.95    |
| 21 | 7266   | DNAJC7    | <a href="#">sp Q99615 DNJC7_HUMAN</a>   | 8        | 0.67                  | 0.64                   | 0.31                  | 0.31                   | 4.03    |
| 22 | 7415   | VCP       | <a href="#">sp P55072 TERA_HUMAN</a>    | 26       | 0.59                  | 0.83                   | 0.13                  | 0.29                   | -0.18   |
| 23 | 25980  | C20orf4   | <a href="#">sp Q9Y312 CT004_HUMAN</a>   | 2        | 0.45                  | 0.44                   | 0.29                  | 0.29                   | 4.65    |
| 24 | 9533   | POLR1C    | <a href="#">sp O15160-2 RPAC1_HUMAN</a> | 1        | 0.38                  | 0.37                   | 0.28                  | 0.28                   | 2.47    |
| 25 | 391634 | HSP90AB2P | <a href="#">sp Q58FF8 H90B2_HUMAN</a>   | 10       | 0.63                  | 0.61                   | 0.25                  | 0.25                   | 4.28    |
| 26 | 10273  | STUB1     | <a href="#">sp Q9UNE7 CHIP_HUMAN</a>    | 2        | 0.38                  | 0.4                    | 0.2                   | 0.25                   | 0.45    |
| 27 | 55747  | FAM21B    | <a href="#">sp Q5SNT6 FA21B_HUMAN</a>   | 2        | 0.43                  | 0.41                   | 0.25                  | 0.25                   | 4.49    |
| 28 | 10382  | TUBB4     | <a href="#">sp P04350 TBB4_HUMAN</a>    | 26       | 0.79                  | 0.76                   | 0.24                  | 0.24                   | 0.46    |
| 29 | 3304   | HSPA1B    | <a href="#">sp P08107 HSP71_HUMAN</a>   | 94       | 1.09                  | 1.05                   | 0.24                  | 0.24                   | 2.3     |
| 30 | 8471   | IRS4      | <a href="#">sp O14654 IRS4_HUMAN</a>    | 8        | 0.58                  | 0.56                   | 0.24                  | 0.24                   | 3.44    |
| 31 | 25929  | GEMIN5    | <a href="#">sp Q8TEQ6 GEMI5_HUMAN</a>   | 1        | 0.35                  | 0.33                   | 0.24                  | 0.24                   | 2.87    |
| 32 | 51377  | UCHL5     | <a href="#">sp Q9Y5K5-2 UCHL5_HUMAN</a> | 1        | 0.35                  | 0.33                   | 0.24                  | 0.24                   | 1.58    |
| 33 | 80349  | WDR61     | <a href="#">sp Q9GZS3 WDR61_HUMAN</a>   | 2        | 0.4                   | 0.38                   | 0.22                  | 0.22                   | 2.05    |
| 34 | 4676   | NAP1L4    | <a href="#">sp Q99733 NP1L4_HUMAN</a>   | 2        | 0.4                   | 0.38                   | 0.22                  | 0.22                   | 3.11    |
| 35 | 3396   | ICT1      | <a href="#">sp Q14197 ICT1_HUMAN</a>    | 2        | 0.4                   | 0.38                   | 0.22                  | 0.22                   | 1.61    |
| 36 | 3320   | HSP90AA1  | <a href="#">sp P07900-2 HS90A_HUMAN</a> | 54       | 0.85                  | 0.83                   | 0.19                  | 0.2                    | 5.67    |
| 37 | 154796 | AMOT      | <a href="#">sp Q4VCS5-2 AMOT_HUMAN</a>  | 3        | 0.42                  | 0.41                   | 0.2                   | 0.2                    | 3.88    |
| 38 | 22820  | COPG      | <a href="#">sp Q9Y678 COPG_HUMAN</a>    | 2        | 0.38                  | 0.37                   | 0.2                   | 0.2                    | 0.86    |
| 39 | 2017   | CTTN      | <a href="#">sp Q14247 SRC8_HUMAN</a>    | 3        | 0.42                  | 0.41                   | 0.2                   | 0.2                    | 3.51    |
| 40 | 6749   | SSRP1     | <a href="#">sp Q08945 SSRP1_HUMAN</a>   | 1        | 0.32                  | 0.31                   | 0.2                   | 0.2                    | 2.67    |
| 41 | 2316   | FLNA      | <a href="#">sp P21333-2 FLNA_HUMAN</a>  | 56       | 0.85                  | 0.82                   | 0.19                  | 0.19                   | 0.08    |
| 42 | 54953  | C1orf27   | <a href="#">sp Q5SWX8-2 ODR4_HUMAN</a>  | 4        | 0.44                  | 0.42                   | 0.19                  | 0.19                   | 2.53    |

|    |       |          |                                          |    |      |      |      |      |       |
|----|-------|----------|------------------------------------------|----|------|------|------|------|-------|
| 43 | 10755 | GIPC1    | <a href="#">sp O14908 GIPC1_HUMAN</a>    | 1  | 0.85 | 0.82 | 0.19 | 0.19 | 7.54  |
| 44 | 1642  | DDB1     | <a href="#">sp Q16531 DDB1_HUMAN</a>     | 5  | 0.31 | 0.45 | 0.09 | 0.19 | -0.12 |
| 45 | 23607 | CD2AP    | <a href="#">sp Q9Y5K6 CD2AP_HUMAN</a>    | 1  | 0.85 | 0.82 | 0.19 | 0.19 | 7.54  |
| 46 | 11319 | ECD      | <a href="#">sp O95905 SGT1_HUMAN</a>     | 1  | 0.85 | 0.82 | 0.19 | 0.19 | 7.54  |
| 47 | 28985 | MCTS1    | <a href="#">sp Q9ULC4-2 MCTS1_HUMAN</a>  | 1  | 0.85 | 0.82 | 0.19 | 0.19 | 7.54  |
| 48 | 8550  | MAPKAPK5 | <a href="#">sp Q8IW41-2 MAPK5_HUMAN</a>  | 1  | 0.85 | 0.82 | 0.19 | 0.19 | 7.54  |
| 49 | 56269 | IRGC     | <a href="#">sp Q6NXR0 IIGP5_HUMAN</a>    | 1  | 0.85 | 0.82 | 0.19 | 0.19 | 7.54  |
| 50 | 56160 | NDNL2    | <a href="#">sp Q96MG7 MAGG1_HUMAN</a>    | 1  | 0.85 | 0.82 | 0.19 | 0.19 | 7.54  |
| 51 | 3326  | HSP90AB1 | <a href="#">sp P08238 HS90B_HUMAN</a>    | 45 | 0.78 | 0.75 | 0.18 | 0.18 | 4.65  |
| 52 | 3312  | HSPA8    | <a href="#">sp P11142 HSP7C_HUMAN</a>    | 52 | 0.81 | 0.78 | 0.18 | 0.18 | 0.8   |
| 53 | 2194  | FASN     | <a href="#">sp P49327 FAS_HUMAN</a>      | 23 | 0.6  | 0.63 | 0.15 | 0.18 | 2.3   |
| 54 | 10238 | DCAF7    | <a href="#">sp P61962 DCAF7_HUMAN</a>    | 2  | 0.36 | 0.35 | 0.18 | 0.18 | 1.84  |
| 55 | 9403  | 15-Sep   | <a href="#">sp O60613 SEP15_HUMAN</a>    | 1  | 0.3  | 0.29 | 0.18 | 0.18 | 2.05  |
| 56 | 7280  | TUBB2A   | <a href="#">sp Q13885 TBB2A_HUMAN</a>    | 23 | 0.65 | 0.62 | 0.17 | 0.17 | 0.06  |
| 57 | 3305  | HSPA1L   | <a href="#">sp P34931 HS71L_HUMAN</a>    | 40 | 0.75 | 0.72 | 0.17 | 0.17 | 1.66  |
| 58 | 10808 | HSPH1    | <a href="#">sp Q92598-2 HS105_HUMAN</a>  | 13 | 0.5  | 0.53 | 0.13 | 0.17 | 1.31  |
| 59 | 10460 | TACC3    | <a href="#">sp Q9Y6A5 TACC3_HUMAN</a>    | 4  | 0.41 | 0.4  | 0.17 | 0.17 | 4.48  |
| 60 | 10181 | RBM5     | <a href="#">sp P52756 RBM5_HUMAN</a>     | 3  | 0.39 | 0.38 | 0.17 | 0.17 | 2.85  |
| 61 | 7846  | TUBA1A   | <a href="#">sp Q71U36 TBA1A_HUMAN</a>    | 23 | 0.64 | 0.61 | 0.17 | 0.17 | 0.14  |
| 62 | 23112 | TNRC6B   | <a href="#">sp Q9UPQ9-1 TNR6B_HUMAN</a>  | 4  | 0.41 | 0.4  | 0.17 | 0.17 | 3.47  |
| 63 | 1434  | CSE1L    | <a href="#">sp P55060-3 XPO2_HUMAN</a>   | 4  | 0.41 | 0.4  | 0.17 | 0.17 | 3.21  |
| 64 | 5034  | P4HB     | <a href="#">sp P07237 PDIA1_HUMAN</a>    | 1  | 0.18 | 0.28 | 0.06 | 0.17 | -0.01 |
| 65 | 5636  | PRPSAP2  | <a href="#">sp O60256 KPRB_HUMAN</a>     | 3  | 0.39 | 0.38 | 0.17 | 0.17 | 0.68  |
| 66 | 4628  | MYH10    | <a href="#">sp P35580-2 MYH10_HUMAN</a>  | 20 | 0.59 | 0.58 | 0.15 | 0.16 | 3.65  |
| 67 | 1975  | EIF4B    | <a href="#">sp P23588 IF4B_HUMAN</a>     | 27 | 0.66 | 0.63 | 0.16 | 0.16 | 0.91  |
| 68 | 23527 | ACAP2    | <a href="#">sp Q15057 ACAP2_HUMAN</a>    | 8  | 0.48 | 0.46 | 0.16 | 0.16 | 3.11  |
| 69 | 10963 | STIP1    | <a href="#">sp P31948 STIP1_HUMAN</a>    | 4  | 0.4  | 0.38 | 0.16 | 0.16 | 2.44  |
| 70 | 6093  | ROCK1    | <a href="#">sp Q13464 ROCK1_HUMAN</a>    | 11 | 0.5  | 0.5  | 0.15 | 0.16 | 2.17  |
| 71 | 6510  | SLC1A5   | <a href="#">sp Q15758 AAAT_HUMAN</a>     | 2  | 0.3  | 0.33 | 0.12 | 0.16 | 0.84  |
| 72 | 10944 | C11orf58 | <a href="#">sp O00193 SMAP_HUMAN</a>     | 1  | 0.28 | 0.27 | 0.16 | 0.16 | 1.91  |
| 73 | 9406  | ZRANB2   | <a href="#">sp O95218-2 ZRAB2_HUMAN</a>  | 3  | 0.33 | 0.36 | 0.12 | 0.16 | 0.52  |
| 74 | 57003 | CCDC47   | <a href="#">sp Q96A33-2 CCDC47_HUMAN</a> | 1  | 0.28 | 0.27 | 0.16 | 0.16 | 1.91  |
| 75 | 10419 | PRMT5    | <a href="#">sp O14744 ANM5_HUMAN</a>     | 32 | 0.66 | 0.63 | 0.15 | 0.15 | -0.42 |
| 76 | 9208  | LRRFIP1  | <a href="#">sp Q32MZ4-2 LRRF1_HUMAN</a>  | 3  | 0.37 | 0.35 | 0.15 | 0.15 | 3.47  |
| 77 | 9093  | DNAJA3   | <a href="#">sp Q96EY1-2 DNJA3_HUMAN</a>  | 5  | 0.41 | 0.4  | 0.15 | 0.15 | 4.07  |
| 78 | 10728 | PTGES3   | <a href="#">sp Q15185 TEBP_HUMAN</a>     | 5  | 0.41 | 0.4  | 0.15 | 0.15 | 5.31  |
| 79 | 27336 | HTATSF1  | <a href="#">sp O43719 HTSF1_HUMAN</a>    | 2  | 0.23 | 0.31 | 0.07 | 0.15 | 0.17  |
| 80 | 5516  | PPP2CB   | <a href="#">sp P62714 PP2AB_HUMAN</a>    | 2  | 0.33 | 0.32 | 0.15 | 0.15 | 1.87  |
| 81 | 4172  | MCM3     | <a href="#">sp P25205 MCM3_HUMAN</a>     | 5  | 0.41 | 0.39 | 0.14 | 0.15 | 1.67  |
| 82 | 10383 | TUBB2C   | <a href="#">sp P68371 TBB2C_HUMAN</a>    | 24 | 0.59 | 0.57 | 0.14 | 0.14 | -0.04 |
| 83 | 84617 | TUBB6    | <a href="#">sp Q9BUF5 TBB6_HUMAN</a>     | 13 | 0.51 | 0.49 | 0.14 | 0.14 | 0.37  |
| 84 | 3310  | HSPA6    | <a href="#">sp P17066 HSP76_HUMAN</a>    | 27 | 0.62 | 0.59 | 0.14 | 0.14 | 2.32  |
| 85 | 7203  | CCT3     | <a href="#">sp P49368 TCPPG_HUMAN</a>    | 30 | 0.63 | 0.6  | 0.14 | 0.14 | 0.84  |
| 86 | 51479 | ANKFY1   | <a href="#">sp Q9P2R3-4 ANFY1_HUMAN</a>  | 21 | 0.58 | 0.56 | 0.14 | 0.14 | 0.96  |

|     |                 |                                         |    |      |      |      |      |       |
|-----|-----------------|-----------------------------------------|----|------|------|------|------|-------|
| 87  | 3308 HSPA4      | <a href="#">sp P34932 HSP74_HUMAN</a>   | 22 | 0.58 | 0.56 | 0.14 | 0.14 | 1.16  |
| 88  | 84790 TUBA1C    | <a href="#">sp Q9BQE3 TBA1C_HUMAN</a>   | 18 | 0.55 | 0.53 | 0.14 | 0.14 | -0.1  |
| 89  | 10576 CCT2      | <a href="#">sp P78371 TCPB_HUMAN</a>    | 30 | 0.62 | 0.6  | 0.14 | 0.14 | 0.66  |
| 90  | 51184 GPN3      | <a href="#">sp Q9UHW5-2 GPN3_HUMAN</a>  | 1  | 0.6  | 0.61 | 0.13 | 0.14 | 0.68  |
| 91  | 7086 TKT        | <a href="#">sp P29401 TKT_HUMAN</a>     | 2  | 0.32 | 0.31 | 0.14 | 0.14 | 1.63  |
| 92  | 1503 CTPS       | <a href="#">sp P17812 PYRG1_HUMAN</a>   | 3  | 0.35 | 0.33 | 0.14 | 0.14 | 1.28  |
| 93  | 10962 MLLT11    | <a href="#">sp Q13015 AF1Q_HUMAN</a>    | 1  | 0.27 | 0.26 | 0.14 | 0.14 | 1.23  |
| 94  | 10197 PSME3     | <a href="#">sp P61289-2 PSME3_HUMAN</a> | 1  | 0.27 | 0.26 | 0.14 | 0.14 | 1.84  |
| 95  | 203068 TUBB     | <a href="#">sp P07437 TBB5_HUMAN</a>    | 29 | 0.61 | 0.58 | 0.13 | 0.13 | -0.19 |
| 96  | 7184 HSP90B1    | <a href="#">sp P14625 ENPL_HUMAN</a>    | 9  | 0.45 | 0.43 | 0.13 | 0.13 | 2.69  |
| 97  | 4627 MYH9       | <a href="#">sp P35579 MYH9_HUMAN</a>    | 22 | 0.57 | 0.55 | 0.13 | 0.13 | 2.98  |
| 98  | 10075 HUWE1     | <a href="#">sp Q7Z6Z7-2 HUWE1_HUMAN</a> | 15 | 0.49 | 0.48 | 0.12 | 0.13 | 3.45  |
| 99  | 1832 DSP        | <a href="#">sp P15924-2 DESP_HUMAN</a>  | 1  | 0.23 | 0.24 | 0.1  | 0.13 | 0.3   |
| 100 | 10376 TUBA1B    | <a href="#">sp P68363 TBA1B_HUMAN</a>   | 24 | 0.57 | 0.54 | 0.13 | 0.13 | -0.08 |
| 101 | 3301 DNJA1      | <a href="#">sp P31689 DNJA1_HUMAN</a>   | 15 | 0.51 | 0.5  | 0.13 | 0.13 | 4.24  |
| 102 | 11329 STK38     | <a href="#">sp Q15208 STK38_HUMAN</a>   | 22 | 0.55 | 0.53 | 0.13 | 0.13 | -0.15 |
| 103 | 1778 DYNC1H1    | <a href="#">sp Q14204 DYHC1_HUMAN</a>   | 12 | 0.47 | 0.45 | 0.13 | 0.13 | -0.1  |
| 104 | 6950 TCP1       | <a href="#">sp P17987 TCPA_HUMAN</a>    | 28 | 0.6  | 0.57 | 0.13 | 0.13 | 0.63  |
| 105 | 11316 COPE      | <a href="#">sp Q14579 COPE_HUMAN</a>    | 2  | 0.31 | 0.3  | 0.13 | 0.13 | 2.29  |
| 106 | 4763 NF1        | <a href="#">sp P21359-2 NF1_HUMAN</a>   | 1  | 0.6  | 0.58 | 0.13 | 0.13 | 5.05  |
| 107 | 54930 HAUS4     | <a href="#">sp Q9H6D7-3 HAUS4_HUMAN</a> | 1  | 0.6  | 0.58 | 0.13 | 0.13 | 5.05  |
| 108 | 10535 RNASEH2A  | <a href="#">sp Q75792 RNH2A_HUMAN</a>   | 1  | 0.6  | 0.58 | 0.13 | 0.13 | 1.1   |
| 109 | 6728 SRP19      | <a href="#">sp P09132 SRP19_HUMAN</a>   | 1  | 0.6  | 0.58 | 0.13 | 0.13 | 5.05  |
| 110 | 161 AP2A2       | <a href="#">sp Q94973-2 AP2A2_HUMAN</a> | 1  | 0.6  | 0.58 | 0.13 | 0.13 | 5.05  |
| 111 | 151987 PPP4R2   | <a href="#">sp Q9NY27-3 PP4R2_HUMAN</a> | 1  | 0.49 | 0.58 | 0.11 | 0.13 | 0.17  |
| 112 | 6830 SUPT6H     | <a href="#">sp Q7KZ85-3 SPT6H_HUMAN</a> | 1  | 0.6  | 0.58 | 0.13 | 0.13 | 5.05  |
| 113 | 10013 HDAC6     | <a href="#">sp Q9UBN7 HDAC6_HUMAN</a>   | 1  | 0.6  | 0.58 | 0.13 | 0.13 | 5.05  |
| 114 | 2319 FLOT2      | <a href="#">sp Q14254 FLOT2_HUMAN</a>   | 1  | 0.6  | 0.58 | 0.13 | 0.13 | 3.28  |
| 115 | 11047 ADRM1     | <a href="#">sp Q16186 ADRM1_HUMAN</a>   | 2  | 0.31 | 0.3  | 0.13 | 0.13 | 2.09  |
| 116 | 26985 AP3M1     | <a href="#">sp Q9Y2T2 AP3M1_HUMAN</a>   | 1  | 0.6  | 0.58 | 0.13 | 0.13 | 5.05  |
| 117 | 5830 PEX5       | <a href="#">sp P50542-2 PEX5_HUMAN</a>  | 1  | 0.6  | 0.58 | 0.13 | 0.13 | 5.05  |
| 118 | 2318 FLNC       | <a href="#">sp Q14315-2 FLNC_HUMAN</a>  | 5  | 0.37 | 0.35 | 0.12 | 0.12 | 1.1   |
| 119 | 144097 C11orf84 | <a href="#">sp Q9BUA3 CK084_HUMAN</a>   | 17 | 0.5  | 0.48 | 0.12 | 0.12 | 0.92  |
| 120 | 22824 HSPA4L    | <a href="#">sp Q95757 HS74L_HUMAN</a>   | 7  | 0.39 | 0.38 | 0.11 | 0.12 | 0.63  |
| 121 | 10694 CCT8      | <a href="#">sp P50990 TCPQ_HUMAN</a>    | 24 | 0.56 | 0.54 | 0.12 | 0.12 | 0.3   |
| 122 | 10575 CCT4      | <a href="#">sp P50991 TCPD_HUMAN</a>    | 21 | 0.52 | 0.5  | 0.12 | 0.12 | 0.25  |
| 123 | 3832 KIF11      | <a href="#">sp P52732 KIF11_HUMAN</a>   | 8  | 0.39 | 0.4  | 0.11 | 0.12 | -0.27 |
| 124 | 22948 CCT5      | <a href="#">sp P48643 TCPE_HUMAN</a>    | 23 | 0.55 | 0.52 | 0.12 | 0.12 | 0.63  |
| 125 | 476 ATP1A1      | <a href="#">sp P05023 AT1A1_HUMAN</a>   | 5  | 0.28 | 0.35 | 0.07 | 0.12 | -0.06 |
| 126 | 4173 MCM4       | <a href="#">sp P33991 MCM4_HUMAN</a>    | 6  | 0.39 | 0.37 | 0.12 | 0.12 | 3.59  |
| 127 | 10294 DNJA2     | <a href="#">sp Q60884 DNJA2_HUMAN</a>   | 11 | 0.45 | 0.44 | 0.12 | 0.12 | 2.77  |
| 128 | 51593 SRRT      | <a href="#">sp Q9BXP5-2 SRRT_HUMAN</a>  | 1  | 0.25 | 0.24 | 0.12 | 0.12 | 1.28  |
| 129 | 5631 PRPS1      | <a href="#">sp P60891 PRPS1_HUMAN</a>   | 4  | 0.35 | 0.34 | 0.12 | 0.12 | 1.02  |
| 130 | 3188 HNRNPH2    | <a href="#">sp P55795 HNRH2_HUMAN</a>   | 3  | 0.32 | 0.31 | 0.12 | 0.12 | 0.77  |

|     |                      |                                         |    |      |      |      |      |       |
|-----|----------------------|-----------------------------------------|----|------|------|------|------|-------|
| 131 | 3028 HSD17B10        | <a href="#">sp Q99714-2 HCD2_HUMAN</a>  | 3  | 0.26 | 0.31 | 0.07 | 0.12 | -0.01 |
| 132 | 10946 SF3A3          | <a href="#">sp Q12874 SF3A3_HUMAN</a>   | 2  | 0.3  | 0.29 | 0.12 | 0.12 | 2     |
| 133 | 1460 CSNK2B          | <a href="#">sp P67870 CSK2B_HUMAN</a>   | 2  | 0.3  | 0.29 | 0.12 | 0.12 | 1.75  |
| 134 | 10487 CAP1           | <a href="#">sp Q01518-2 CAP1_HUMAN</a>  | 1  | 0.25 | 0.24 | 0.12 | 0.12 | 1.35  |
| 135 | 10857 PGRMC1         | <a href="#">sp O00264 PGRMC1_HUMAN</a>  | 1  | 0.25 | 0.24 | 0.12 | 0.12 | 0.6   |
| 136 | 10625 IVNS1ABP       | <a href="#">sp Q9Y6Y0 INS1BP_HUMAN</a>  | 9  | 0.4  | 0.39 | 0.11 | 0.11 | 1.17  |
| 137 | 2317 FLNB            | <a href="#">sp O75369-2 FLNB_HUMAN</a>  | 11 | 0.43 | 0.41 | 0.11 | 0.11 | 1.73  |
| 138 | 3852 KRT5            | <a href="#">sp P13647 K2C5_HUMAN</a>    | 3  | 0.3  | 0.29 | 0.1  | 0.11 | 0.13  |
| 139 | 5955 RCN2            | <a href="#">sp Q14257 RCN2_HUMAN</a>    | 9  | 0.39 | 0.39 | 0.1  | 0.11 | 1.61  |
| 140 | CCD55_HUMCCD55_HUMAN | <a href="#">sp Q9H0G5 CCD55_HUMAN</a>   | 1  | 0.49 | 0.47 | 0.11 | 0.11 | 4.13  |
| 141 | 10454 TAB1           | <a href="#">sp Q15750 TAB1_HUMAN</a>    | 13 | 0.46 | 0.44 | 0.11 | 0.11 | 0.68  |
| 142 | 10574 CCT7           | <a href="#">sp Q99832 TCPH_HUMAN</a>    | 21 | 0.52 | 0.5  | 0.11 | 0.11 | 0.31  |
| 143 | 92609 TIMM50         | <a href="#">sp Q3ZCQ8-2 TIM50_HUMAN</a> | 4  | 0.34 | 0.33 | 0.11 | 0.11 | 2.11  |
| 144 | 9793 CKAP5           | <a href="#">sp Q14008-2 CKAP5_HUMAN</a> | 8  | 0.4  | 0.38 | 0.11 | 0.11 | 0.62  |
| 145 | 8241 RBM10           | <a href="#">sp P98175-2 RBM10_HUMAN</a> | 15 | 0.47 | 0.45 | 0.11 | 0.11 | -0.18 |
| 146 | 3857 KRT9            | <a href="#">sp P35527 K1C9_HUMAN</a>    | 15 | 0.47 | 0.45 | 0.11 | 0.11 | 0.81  |
| 147 | 54442 KCTD5          | <a href="#">sp Q9NXV2 KCTD5_HUMAN</a>   | 4  | 0.33 | 0.32 | 0.11 | 0.11 | -0.08 |
| 148 | 79084 WDR77          | <a href="#">sp Q9BQA1 MEP50_HUMAN</a>   | 18 | 0.5  | 0.48 | 0.11 | 0.11 | -0.1  |
| 149 | 23633 KPNA6          | <a href="#">sp O60684 IMA7_HUMAN</a>    | 1  | 0.49 | 0.47 | 0.11 | 0.11 | 4.13  |
| 150 | 9958 USP15           | <a href="#">sp Q9Y4E8-2 UBP15_HUMAN</a> | 9  | 0.41 | 0.4  | 0.11 | 0.11 | 0.96  |
| 151 | 10190 TXNDC9         | <a href="#">sp O14530 TXND9_HUMAN</a>   | 1  | 0.49 | 0.47 | 0.11 | 0.11 | 4.13  |
| 152 | 23193 GANAB          | <a href="#">sp Q14697-2 GANAB_HUMAN</a> | 2  | 0.26 | 0.27 | 0.1  | 0.11 | 0.69  |
| 153 | 1785 DNM2            | <a href="#">sp P50570-2 DYN2_HUMAN</a>  | 1  | 0.49 | 0.47 | 0.11 | 0.11 | 4.13  |
| 154 | 22818 COPZ1          | <a href="#">sp P61923 COPZ1_HUMAN</a>   | 1  | 0.49 | 0.47 | 0.11 | 0.11 | 4.13  |
| 155 | 22803 XRN2           | <a href="#">sp Q9H0D6-2 XRN2_HUMAN</a>  | 1  | 0.49 | 0.47 | 0.11 | 0.11 | 2.12  |
| 156 | 3106 HLA-B           | <a href="#">sp P01889 IB07_HUMAN</a>    | 1  | 0.49 | 0.47 | 0.11 | 0.11 | 4.13  |
| 157 | 347688 TUBB8         | <a href="#">sp Q3ZCM7 TBB8_HUMAN</a>    | 12 | 0.41 | 0.4  | 0.1  | 0.1  | 0.03  |
| 158 | 3858 KRT10           | <a href="#">sp P13645 K1C10_HUMAN</a>   | 16 | 0.46 | 0.44 | 0.1  | 0.1  | 0.73  |
| 159 | 47 ACLY              | <a href="#">sp P53396 ACLY_HUMAN</a>    | 5  | 0.34 | 0.33 | 0.1  | 0.1  | 1.57  |
| 160 | 2969 GTF2I           | <a href="#">sp P78347-2 GTF2I_HUMAN</a> | 3  | 0.3  | 0.29 | 0.1  | 0.1  | 2.07  |
| 161 | 26121 PRPF31         | <a href="#">sp Q8WWY3 PRP31_HUMAN</a>   | 11 | 0.41 | 0.39 | 0.1  | 0.1  | 0.03  |
| 162 | 54726 OTUD4          | <a href="#">sp Q01804 OTUD4_HUMAN</a>   | 9  | 0.4  | 0.38 | 0.1  | 0.1  | 1.32  |
| 163 | 10526 IPO8           | <a href="#">sp O15397 IPO8_HUMAN</a>    | 8  | 0.37 | 0.36 | 0.1  | 0.1  | 0.9   |
| 164 | 70 ACTC1             | <a href="#">sp P68032 ACTC_HUMAN</a>    | 5  | 0.33 | 0.32 | 0.1  | 0.1  | 0.18  |
| 165 | 6885 MAP3K7          | <a href="#">sp O43318-2 M3K7_HUMAN</a>  | 9  | 0.39 | 0.38 | 0.1  | 0.1  | 1.09  |
| 166 | 51726 DNAJB11        | <a href="#">sp Q9UBS4 DJB11_HUMAN</a>   | 2  | 0.26 | 0.26 | 0.1  | 0.1  | 0.9   |
| 167 | 6218 RPS17           | <a href="#">sp P08708 RS17_HUMAN</a>    | 2  | 0.26 | 0.25 | 0.1  | 0.1  | 0.97  |
| 168 | 10128 LRPPRC         | <a href="#">sp P42704 LRPPRC_HUMAN</a>  | 2  | 0.26 | 0.25 | 0.1  | 0.1  | 0.47  |
| 169 | 3309 HSPA5           | <a href="#">sp P11021 GRP78_HUMAN</a>   | 14 | 0.43 | 0.41 | 0.09 | 0.09 | -0.16 |
| 170 | 9276 COPB2           | <a href="#">sp P35606 COPB2_HUMAN</a>   | 3  | 0.27 | 0.27 | 0.08 | 0.09 | 0.65  |
| 171 | 3848 KRT1            | <a href="#">sp P04264 K2C1_HUMAN</a>    | 12 | 0.39 | 0.38 | 0.09 | 0.09 | -0.23 |
| 172 | 9343 EFTUD2          | <a href="#">sp Q15029 U5S1_HUMAN</a>    | 10 | 0.38 | 0.37 | 0.09 | 0.09 | 2.98  |
| 173 | 908 CCT6A            | <a href="#">sp P40227 TCPZ_HUMAN</a>    | 12 | 0.4  | 0.38 | 0.09 | 0.09 | -0.02 |
| 174 | 3313 HSPA9           | <a href="#">sp P38646 GRP75_HUMAN</a>   | 13 | 0.41 | 0.39 | 0.09 | 0.09 | -0.17 |



|     |                |                                         |    |      |      |      |      |       |
|-----|----------------|-----------------------------------------|----|------|------|------|------|-------|
| 175 | 3030 HADHA     | <a href="#">sp P40939 ECHA_HUMAN</a>    | 2  | 0.25 | 0.25 | 0.09 | 0.09 | 0.36  |
| 176 | 10927 SPIN1    | <a href="#">sp Q9Y657 SPIN1_HUMAN</a>   | 9  | 0.37 | 0.36 | 0.09 | 0.09 | 0.13  |
| 177 | 23020 SNRNP200 | <a href="#">sp O75643 U520_HUMAN</a>    | 10 | 0.38 | 0.37 | 0.09 | 0.09 | 1.34  |
| 178 | 10594 PRPF8    | <a href="#">sp Q6P2Q9 PRPF8_HUMAN</a>   | 9  | 0.37 | 0.36 | 0.09 | 0.09 | 1.27  |
| 179 | 1314 COPA      | <a href="#">sp P53621-2 COPA_HUMAN</a>  | 4  | 0.28 | 0.3  | 0.08 | 0.09 | 0.55  |
| 180 | 5436 POLR2G    | <a href="#">sp P62487 RPB7_HUMAN</a>    | 1  | 0.42 | 0.41 | 0.09 | 0.09 | 1.25  |
| 181 | 9785 DHX38     | <a href="#">sp Q92620 PRP16_HUMAN</a>   | 3  | 0.28 | 0.27 | 0.09 | 0.09 | 0.87  |
| 182 | 2010 EMD       | <a href="#">sp P50402 EMD_HUMAN</a>     | 1  | 0.21 | 0.2  | 0.09 | 0.09 | 0.43  |
| 183 | 4144 MAT2A     | <a href="#">sp P31153 METK2_HUMAN</a>   | 5  | 0.33 | 0.31 | 0.09 | 0.09 | 1.68  |
| 184 | 79596 RNF219   | <a href="#">sp Q5W0B1 RN219_HUMAN</a>   | 2  | 0.26 | 0.25 | 0.09 | 0.09 | 0.76  |
| 185 | 5430 POLR2A    | <a href="#">sp P24928 RPB1_HUMAN</a>    | 1  | 0.35 | 0.41 | 0.08 | 0.09 | 0.33  |
| 186 | 5704 PSMC4     | <a href="#">sp P43686 PRS6B_HUMAN</a>   | 3  | 0.28 | 0.27 | 0.09 | 0.09 | 2.11  |
| 187 | 6767 ST13      | <a href="#">sp P50502 F10A1_HUMAN</a>   | 2  | 0.25 | 0.24 | 0.09 | 0.09 | 1.69  |
| 188 | 5824 PEX19     | <a href="#">sp P40855-5 PEX19_HUMAN</a> | 1  | 0.42 | 0.41 | 0.09 | 0.09 | 2.68  |
| 189 | 1729 DIAPH1    | <a href="#">sp Q60610-2 DIAP1_HUMAN</a> | 1  | 0.42 | 0.41 | 0.09 | 0.09 | 3.58  |
| 190 | 55749 CCAR1    | <a href="#">sp Q8IX12-2 CCAR1_HUMAN</a> | 2  | 0.26 | 0.25 | 0.09 | 0.09 | 0.78  |
| 191 | 9810 RNF40     | <a href="#">sp O75150-4 BRE1B_HUMAN</a> | 1  | 0.42 | 0.41 | 0.09 | 0.09 | 3.58  |
| 192 | 85313 PPIL4    | <a href="#">sp Q8WUA2 PPIL4_HUMAN</a>   | 3  | 0.29 | 0.28 | 0.09 | 0.09 | 2.21  |
| 193 | 9135 RABEP1    | <a href="#">sp Q15276-2 RABE1_HUMAN</a> | 1  | 0.42 | 0.41 | 0.09 | 0.09 | 3.58  |
| 194 | 79672 FN3KRP   | <a href="#">sp Q9HA64 KT3K_HUMAN</a>    | 1  | 0.42 | 0.41 | 0.09 | 0.09 | 3.58  |
| 195 | 2752 GLUL      | <a href="#">sp P15104 GLNA_HUMAN</a>    | 1  | 0.42 | 0.41 | 0.09 | 0.09 | 1.25  |
| 196 | 7532 YWHAG     | <a href="#">sp P61981 1433G_HUMAN</a>   | 2  | 0.24 | 0.23 | 0.08 | 0.08 | 0.95  |
| 197 | 7531 YWHAE     | <a href="#">sp P62258 1433E_HUMAN</a>   | 7  | 0.33 | 0.32 | 0.08 | 0.08 | 1.78  |
| 198 | 3861 KRT14     | <a href="#">sp P02533 K1C14_HUMAN</a>   | 3  | 0.25 | 0.25 | 0.07 | 0.08 | 0.01  |
| 199 | 3849 KRT2      | <a href="#">sp P35908 K22E_HUMAN</a>    | 8  | 0.33 | 0.32 | 0.08 | 0.08 | -0.03 |
| 200 | 10606 PAICS    | <a href="#">sp P22234-2 PUR6_HUMAN</a>  | 3  | 0.26 | 0.25 | 0.08 | 0.08 | 2.69  |
| 201 | 4176 MCM7      | <a href="#">sp P33993 MCM7_HUMAN</a>    | 2  | 0.24 | 0.23 | 0.08 | 0.08 | 1.21  |
| 202 | 1267 CNP       | <a href="#">sp P09543-2 CN37_HUMAN</a>  | 2  | 0.36 | 0.35 | 0.08 | 0.08 | 1.79  |
| 203 | 4175 MCM6      | <a href="#">sp Q14566 MCM6_HUMAN</a>    | 2  | 0.25 | 0.24 | 0.08 | 0.08 | 0.94  |
| 204 | 8546 AP3B1     | <a href="#">sp O00203 AP3B1_HUMAN</a>   | 1  | 0.38 | 0.37 | 0.08 | 0.08 | 2.47  |
| 205 | 57662 KIAA1543 | <a href="#">sp Q9P1Y5 CAMP3_HUMAN</a>   | 4  | 0.28 | 0.27 | 0.08 | 0.08 | 0.49  |
| 206 | 4548 MTR       | <a href="#">sp Q99707 METH_HUMAN</a>    | 1  | 0.38 | 0.37 | 0.08 | 0.08 | 3.14  |
| 207 | 1938 EEF2      | <a href="#">sp P13639 EF2_HUMAN</a>     | 7  | 0.33 | 0.31 | 0.08 | 0.08 | 0.87  |
| 208 | 65008 MRPL1    | <a href="#">sp Q9BYD6 RM01_HUMAN</a>    | 1  | 0.35 | 0.33 | 0.08 | 0.08 | 2.87  |
| 209 | 83732 RIOK1    | <a href="#">sp Q9BRS2 RIOK1_HUMAN</a>   | 7  | 0.34 | 0.32 | 0.08 | 0.08 | -0.09 |
| 210 | 26065 LSM14A   | <a href="#">sp Q8ND56-2 LS14A_HUMAN</a> | 1  | 0.38 | 0.37 | 0.08 | 0.08 | 3.14  |
| 211 | 23510 KCTD2    | <a href="#">sp Q14681 KCTD2_HUMAN</a>   | 2  | 0.25 | 0.24 | 0.08 | 0.08 | -0.05 |
| 212 | 79734 KCTD17   | <a href="#">sp Q8N5Z5-2 KCD17_HUMAN</a> | 2  | 0.25 | 0.24 | 0.08 | 0.08 | -0.33 |
| 213 | 23012 STK38L   | <a href="#">sp Q9Y2H1 ST38L_HUMAN</a>   | 8  | 0.35 | 0.34 | 0.08 | 0.08 | -0.36 |
| 214 | 1315 COPB1     | <a href="#">sp P53618 COPB_HUMAN</a>    | 3  | 0.25 | 0.26 | 0.07 | 0.08 | 0.33  |
| 215 | 80222 TARS2    | <a href="#">sp Q9BW92 SYTM_HUMAN</a>    | 1  | 0.35 | 0.33 | 0.08 | 0.08 | 2.87  |
| 216 | 7001 PRDX2     | <a href="#">sp P32119 PRDX2_HUMAN</a>   | 1  | 0.2  | 0.19 | 0.08 | 0.08 | 0.42  |
| 217 | 8607 RUVBL1    | <a href="#">sp Q9Y265 RUVB1_HUMAN</a>   | 6  | 0.31 | 0.3  | 0.08 | 0.08 | 1.56  |
| 218 | 25902 MTHFD1L  | <a href="#">sp Q6UB35 C1TM_HUMAN</a>    | 1  | 0.2  | 0.19 | 0.08 | 0.08 | 0.51  |

|     |               |                                                |   |      |      |      |      |       |
|-----|---------------|------------------------------------------------|---|------|------|------|------|-------|
| 219 | 1207 CLNS1A   | <a href="#">sp P54105 ICLN_HUMAN</a>           | 7 | 0.33 | 0.31 | 0.08 | 0.08 | -0.34 |
| 220 | 4131 MAP1B    | <a href="#">sp P46821 MAP1B_HUMAN</a>          | 8 | 0.34 | 0.33 | 0.08 | 0.08 | -0.38 |
| 221 | 3843 IPO5     | <a href="#">sp O00410-2 IPO5_HUMAN</a>         | 2 | 0.36 | 0.35 | 0.08 | 0.08 | 2.27  |
| 222 | 7273 TTN      | <a href="#">sp Q8WZ42-2 TTIN_HUMAN</a>         | 4 | 0.28 | 0.27 | 0.08 | 0.08 | 2.72  |
| 223 | 3276 PRMT1    | <a href="#">sp Q99873-2 ANM1_HUMAN</a>         | 3 | 0.22 | 0.25 | 0.05 | 0.08 | -0.28 |
| 224 | 23118 TAB2    | <a href="#">sp Q9NYJ8 TAB2_HUMAN</a>           | 4 | 0.29 | 0.28 | 0.08 | 0.08 | 1.82  |
| 225 | 230 ALDOC     | <a href="#">sp P09972 ALDOC_HUMAN</a>          | 1 | 0.35 | 0.33 | 0.08 | 0.08 | 2.87  |
| 226 | 64151 NCAPG   | <a href="#">sp Q9BPX3 CND3_HUMAN</a>           | 3 | 0.26 | 0.25 | 0.08 | 0.08 | 2.02  |
| 227 | 8880 FUBP1    | <a href="#">sp Q96AE4-2 FUBP1_HUMAN</a>        | 1 | 0.38 | 0.37 | 0.08 | 0.08 | 2.05  |
| 228 | 3799 KIF5B    | <a href="#">sp P33176 KINH_HUMAN</a>           | 3 | 0.27 | 0.26 | 0.08 | 0.08 | 1.4   |
| 229 | 10657 KHDRBS1 | <a href="#">sp Q07666-2 KHDR1_HUMAN</a>        | 1 | 0.38 | 0.37 | 0.08 | 0.08 | 3.14  |
| 230 | 81 ACTN4      | <a href="#">sp O43707 ACTN4_HUMAN</a>          | 1 | 0.2  | 0.19 | 0.08 | 0.08 | 0.43  |
| 231 | 4927 NUP88    | <a href="#">sp Q99567 NUP88_HUMAN</a>          | 1 | 0.35 | 0.33 | 0.08 | 0.08 | 1.15  |
| 232 | 1477 CSTF1    | <a href="#">sp Q05048 CSTF1_HUMAN</a>          | 1 | 0.35 | 0.33 | 0.08 | 0.08 | 2.87  |
| 233 | 84946 LTV1    | <a href="#">sp Q96GA3 LTV1_HUMAN</a>           | 1 | 0.38 | 0.37 | 0.08 | 0.08 | 2.05  |
| 234 | 53918 PELO    | <a href="#">sp Q9BRX2 PELO_HUMAN</a>           | 1 | 0.35 | 0.33 | 0.08 | 0.08 | 1.79  |
| 235 | 131474 CHCHD4 | <a href="#">sp Q8N4Q1-2 MIA40_HUMAN</a>        | 1 | 0.2  | 0.19 | 0.08 | 0.08 | 0.27  |
| 236 | 55705 IPO9    | <a href="#">sp Q96P70 IPO9_HUMAN</a>           | 1 | 0.35 | 0.33 | 0.08 | 0.08 | 1.79  |
| 237 | 257397 TAB3   | <a href="#">sp Q8N5C8-2 TAB3_HUMAN</a>         | 3 | 0.26 | 0.25 | 0.08 | 0.08 | 1.82  |
| 238 | 9043 SPAG9    | <a href="#">sp O60271-2 JIP4_HUMAN</a>         | 1 | 0.21 | 0.2  | 0.08 | 0.08 | 0.86  |
| 239 | 5831 PYCR1    | <a href="#">sp P32322 P5CR1_HUMAN</a>          | 1 | 0.35 | 0.33 | 0.08 | 0.08 | 1.71  |
| 240 | 51138 COPS4   | <a href="#">sp Q9BT78 CSN4_HUMAN</a>           | 1 | 0.26 | 0.33 | 0.06 | 0.08 | -0.13 |
| 241 | 2997 GYS1     | <a href="#">sp P13807 GYS1_HUMAN</a>           | 1 | 0.35 | 0.33 | 0.08 | 0.08 | 2.87  |
| 242 | 116966 WDR17  | <a href="#">sp Q8IZU2 WDR17_HUMAN</a>          | 1 | 0.38 | 0.37 | 0.08 | 0.08 | 3.14  |
| 243 | 1937 EEF1G    | <a href="#">sp P26641 EF1G_HUMAN</a>           | 8 | 0.32 | 0.31 | 0.07 | 0.07 | 0.07  |
| 244 | 55752         | 11-Sep <a href="#">sp Q9NVA2-2 SEP11_HUMAN</a> | 1 | 0.19 | 0.18 | 0.07 | 0.07 | 0.82  |
| 245 | 10971 YWHAQ   | <a href="#">sp P27348 1433T_HUMAN</a>          | 4 | 0.27 | 0.26 | 0.07 | 0.07 | 1.64  |
| 246 | 9131 AIFM1    | <a href="#">sp O95831-3 AIFM1_HUMAN</a>        | 6 | 0.3  | 0.29 | 0.07 | 0.07 | 0.48  |
| 247 | 10155 TRIM28  | <a href="#">sp Q13263 TIF1B_HUMAN</a>          | 6 | 0.3  | 0.28 | 0.07 | 0.07 | 1.14  |
| 248 | 5687 PSMA6    | <a href="#">sp P60900 PSA6_HUMAN</a>           | 3 | 0.25 | 0.24 | 0.07 | 0.07 | 2.2   |
| 249 | 191 AHCY      | <a href="#">sp P23526 SAHH_HUMAN</a>           | 2 | 0.22 | 0.21 | 0.07 | 0.07 | 1.56  |
| 250 | 5700 PSMC1    | <a href="#">sp P62191 PRS4_HUMAN</a>           | 5 | 0.28 | 0.27 | 0.07 | 0.07 | 1.47  |
| 251 | 5111 PCNA     | <a href="#">sp P12004 PCNA_HUMAN</a>           | 3 | 0.24 | 0.23 | 0.07 | 0.07 | 0.19  |
| 252 | 3329 HSPD1    | <a href="#">sp P10809 CH60_HUMAN</a>           | 8 | 0.32 | 0.31 | 0.07 | 0.07 | 0.16  |
| 253 | 8661 EIF3A    | <a href="#">sp Q14152 EIF3A_HUMAN</a>          | 6 | 0.29 | 0.28 | 0.07 | 0.07 | -0.77 |
| 254 | 60 ACTB       | <a href="#">sp P60709 ACTB_HUMAN</a>           | 8 | 0.32 | 0.31 | 0.07 | 0.07 | -0.17 |
| 255 | 6599 SMARCC1  | <a href="#">sp Q92922 SMRC1_HUMAN</a>          | 1 | 0.32 | 0.31 | 0.07 | 0.07 | 1.71  |
| 256 | 5707 PSMD1    | <a href="#">sp Q99460-2 PSMD1_HUMAN</a>        | 6 | 0.3  | 0.29 | 0.07 | 0.07 | 0.77  |
| 257 | 813 CALU      | <a href="#">sp O43852-2 CALU_HUMAN</a>         | 1 | 0.19 | 0.18 | 0.07 | 0.07 | 0.37  |
| 258 | 51143 DYNC1L1 | <a href="#">sp Q9Y6G9 DC1L1_HUMAN</a>          | 2 | 0.23 | 0.22 | 0.07 | 0.07 | 2.18  |
| 259 | 56886 UGGT1   | <a href="#">sp Q9NYU2-2 UGGG1_HUMAN</a>        | 2 | 0.31 | 0.3  | 0.07 | 0.07 | 0.19  |
| 260 | 5717 PSMD11   | <a href="#">sp O00231 PSD11_HUMAN</a>          | 6 | 0.3  | 0.29 | 0.07 | 0.07 | 0.8   |
| 261 | 3921 RPSA     | <a href="#">sp P08865 RSSA_HUMAN</a>           | 4 | 0.28 | 0.26 | 0.07 | 0.07 | 0.91  |
| 262 | 83473 KATNAL2 | <a href="#">sp Q8IYT4-2 KATL2_HUMAN</a>        | 1 | 0.19 | 0.18 | 0.07 | 0.07 | 0.29  |

|     |        |          |                                         |   |      |      |      |      |       |
|-----|--------|----------|-----------------------------------------|---|------|------|------|------|-------|
| 263 | 9918   | NCAPD2   | <a href="#">sp Q15021 CND1_HUMAN</a>    | 1 | 0.19 | 0.18 | 0.07 | 0.07 | 0.6   |
| 264 | 8826   | IQGAP1   | <a href="#">sp P46940 IQGA1_HUMAN</a>   | 1 | 0.32 | 0.31 | 0.07 | 0.07 | 2.15  |
| 265 | 3190   | HNRNPK   | <a href="#">sp P61978-2 HNRPK_HUMAN</a> | 7 | 0.3  | 0.29 | 0.07 | 0.07 | 0.15  |
| 266 | 178    | AGL      | <a href="#">sp P35573-2 GDE_HUMAN</a>   | 7 | 0.3  | 0.29 | 0.07 | 0.07 | -0.57 |
| 267 | 10465  | PPIH     | <a href="#">sp O43447 PPIH_HUMAN</a>    | 1 | 0.3  | 0.29 | 0.07 | 0.07 | 2.46  |
| 268 | 3182   | HNRNPAB  | <a href="#">sp Q99729-2 ROAA_HUMAN</a>  | 2 | 0.23 | 0.22 | 0.07 | 0.07 | 1     |
| 269 | 1915   | EEF1A1   | <a href="#">sp P68104 EF1A1_HUMAN</a>   | 9 | 0.34 | 0.32 | 0.07 | 0.07 | 0.13  |
| 270 | 790    | CAD      | <a href="#">sp P27708 PYR1_HUMAN</a>    | 8 | 0.33 | 0.31 | 0.07 | 0.07 | 0.23  |
| 271 | 377    | ARF3     | <a href="#">sp P61204 ARF3_HUMAN</a>    | 1 | 0.19 | 0.19 | 0.07 | 0.07 | 0.68  |
| 272 | 10540  | DCTN2    | <a href="#">sp Q13561-2 DCTN2_HUMAN</a> | 2 | 0.17 | 0.21 | 0.04 | 0.07 | -0.25 |
| 273 | 1936   | EEF1D    | <a href="#">sp P29692-2 EF1D_HUMAN</a>  | 7 | 0.31 | 0.29 | 0.07 | 0.07 | 1.71  |
| 274 | 26958  | COPG2    | <a href="#">sp Q9UBF2 COPG2_HUMAN</a>   | 1 | 0.32 | 0.31 | 0.07 | 0.07 | 1.18  |
| 275 | 9456   | HOMER1   | <a href="#">sp Q86YM7-2 HOME1_HUMAN</a> | 1 | 0.3  | 0.29 | 0.07 | 0.07 | 2.46  |
| 276 | 4720   | NDUFS2   | <a href="#">sp O75306 NDUS2_HUMAN</a>   | 1 | 0.3  | 0.29 | 0.07 | 0.07 | 1.74  |
| 277 | 4670   | HNRNPM   | <a href="#">sp P52272-2 HNRPM_HUMAN</a> | 1 | 0.19 | 0.18 | 0.07 | 0.07 | 0.2   |
| 278 | 55740  | ENAH     | <a href="#">sp Q8N8S7-2 ENAH_HUMAN</a>  | 1 | 0.32 | 0.31 | 0.07 | 0.07 | 2.67  |
| 279 | 654483 | BOLA2B   | <a href="#">sp Q9H3K6-2 BOLA2_HUMAN</a> | 1 | 0.3  | 0.29 | 0.07 | 0.07 | 2.05  |
| 280 | 4841   | NONO     | <a href="#">sp Q15233 NONO_HUMAN</a>    | 3 | 0.25 | 0.24 | 0.07 | 0.07 | 1.92  |
| 281 | 60496  | AASDHPTT | <a href="#">sp Q9NRN7 ADPPT_HUMAN</a>   | 1 | 0.3  | 0.29 | 0.07 | 0.07 | 2.46  |
| 282 | 9882   | TBC1D4   | <a href="#">sp O60343-2 TBCD4_HUMAN</a> | 1 | 0.32 | 0.33 | 0.07 | 0.07 | 0.94  |
| 283 | 523    | ATP6V1A  | <a href="#">sp P38606 VATA_HUMAN</a>    | 1 | 0.32 | 0.31 | 0.07 | 0.07 | 1.87  |
| 284 | 80335  | WDR82    | <a href="#">sp Q6UXN9 WDR82_HUMAN</a>   | 1 | 0.3  | 0.29 | 0.07 | 0.07 | 2.46  |
| 285 | 23350  | U2SURP   | <a href="#">sp O15042-2 SR140_HUMAN</a> | 1 | 0.26 | 0.25 | 0.06 | 0.06 | 1.39  |
| 286 | 10131  | TRAP1    | <a href="#">sp Q12931 TRAP1_HUMAN</a>   | 5 | 0.26 | 0.25 | 0.06 | 0.06 | 2.19  |
| 287 | 708    | C1QBP    | <a href="#">sp Q07021 C1QBP_HUMAN</a>   | 6 | 0.28 | 0.27 | 0.06 | 0.06 | 0.88  |
| 288 | 84656  | GLYR1    | <a href="#">sp Q49A26-2 GLYR1_HUMAN</a> | 1 | 0.27 | 0.26 | 0.06 | 0.06 | 0.9   |
| 289 | 5702   | PSMC3    | <a href="#">sp P17980 PRS6A_HUMAN</a>   | 5 | 0.27 | 0.26 | 0.06 | 0.06 | 0.89  |
| 290 | 6921   | TCEB1    | <a href="#">sp Q15369 ELOC_HUMAN</a>    | 1 | 0.18 | 0.17 | 0.06 | 0.06 | 0.75  |
| 291 | 7430   | EZR      | <a href="#">sp P15311 EZRI_HUMAN</a>    | 1 | 0.26 | 0.25 | 0.06 | 0.06 | 1.54  |
| 292 | 10121  | ACTR1A   | <a href="#">sp P61163 ACTZ_HUMAN</a>    | 2 | 0.17 | 0.21 | 0.04 | 0.06 | -0.22 |
| 293 | 5685   | PSMA4    | <a href="#">sp P25789 PSA4_HUMAN</a>    | 2 | 0.2  | 0.19 | 0.06 | 0.06 | 0.44  |
| 294 | 23136  | EPB41L3  | <a href="#">sp Q9Y2J2-2 E41L3_HUMAN</a> | 2 | 0.22 | 0.21 | 0.06 | 0.06 | 0.61  |
| 295 | 5479   | PPIB     | <a href="#">sp P23284 PPIB_HUMAN</a>    | 3 | 0.22 | 0.21 | 0.06 | 0.06 | 2.41  |
| 296 | 6730   | SRP68    | <a href="#">sp Q9UHB9-2 SRP68_HUMAN</a> | 1 | 0.28 | 0.27 | 0.06 | 0.06 | 1.91  |
| 297 | 10480  | EIF3M    | <a href="#">sp Q7L2H7 EIF3M_HUMAN</a>   | 4 | 0.25 | 0.24 | 0.06 | 0.06 | 0.04  |
| 298 | 9669   | EIF5B    | <a href="#">sp O60841 IF2P_HUMAN</a>    | 1 | 0.27 | 0.26 | 0.06 | 0.06 | 1.84  |
| 299 | 5701   | PSMC2    | <a href="#">sp P35998 PRS7_HUMAN</a>    | 4 | 0.25 | 0.24 | 0.06 | 0.06 | 0.31  |
| 300 | 4171   | MCM2     | <a href="#">sp P49736 MCM2_HUMAN</a>    | 3 | 0.3  | 0.28 | 0.06 | 0.06 | 1.21  |
| 301 | 5692   | PSMB4    | <a href="#">sp P28070 PSB4_HUMAN</a>    | 3 | 0.23 | 0.22 | 0.06 | 0.06 | 2.11  |
| 302 | 2288   | FKBP4    | <a href="#">sp Q02790 FKBP4_HUMAN</a>   | 1 | 0.28 | 0.27 | 0.06 | 0.06 | 0.69  |
| 303 | 8668   | EIF3I    | <a href="#">sp Q13347 EIF3I_HUMAN</a>   | 4 | 0.24 | 0.23 | 0.06 | 0.06 | -0.11 |
| 304 | 5037   | PEBP1    | <a href="#">sp P30086 PEBP1_HUMAN</a>   | 1 | 0.27 | 0.26 | 0.06 | 0.06 | 1.35  |
| 305 | 506    | ATP5B    | <a href="#">sp P06576 ATPB_HUMAN</a>    | 5 | 0.26 | 0.25 | 0.06 | 0.06 | 0     |
| 306 | 5705   | PSMC5    | <a href="#">sp P62195 PRS8_HUMAN</a>    | 4 | 0.24 | 0.23 | 0.06 | 0.06 | 0.37  |

|     |                |                                         |   |      |      |      |      |       |
|-----|----------------|-----------------------------------------|---|------|------|------|------|-------|
| 307 | 6628 SNRPB     | <a href="#">sp P14678-2 RSMB_HUMAN</a>  | 4 | 0.24 | 0.23 | 0.06 | 0.06 | 0.08  |
| 308 | 3187 HNRNP1    | <a href="#">sp P31943 HNRH1_HUMAN</a>   | 5 | 0.26 | 0.25 | 0.06 | 0.06 | 0.13  |
| 309 | 2746 GLUD1     | <a href="#">sp P00367 DHE3_HUMAN</a>    | 1 | 0.28 | 0.27 | 0.06 | 0.06 | 1.91  |
| 310 | 6202 RPS8      | <a href="#">sp P62241 RS8_HUMAN</a>     | 2 | 0.21 | 0.2  | 0.06 | 0.06 | 0.45  |
| 311 | 10130 PDIA6    | <a href="#">sp Q15084-2 PDIA6_HUMAN</a> | 2 | 0.21 | 0.2  | 0.06 | 0.06 | 0.38  |
| 312 | 5683 PSMA2     | <a href="#">sp P25787 PSA2_HUMAN</a>    | 2 | 0.2  | 0.2  | 0.06 | 0.06 | 0.87  |
| 313 | 444 ASPH       | <a href="#">sp Q12797-2 ASPH_HUMAN</a>  | 1 | 0.26 | 0.25 | 0.06 | 0.06 | 1     |
| 314 | 6632 SNRPD1    | <a href="#">sp P62314 SMD1_HUMAN</a>    | 2 | 0.21 | 0.2  | 0.06 | 0.06 | 0.5   |
| 315 | 10421 CD2BP2   | <a href="#">sp O95400 CD2B2_HUMAN</a>   | 2 | 0.22 | 0.21 | 0.06 | 0.06 | 1.38  |
| 316 | 5836 PYGL      | <a href="#">sp P06737 PYGL_HUMAN</a>    | 1 | 0.27 | 0.26 | 0.06 | 0.06 | 0.75  |
| 317 | 2547 XRCC6     | <a href="#">sp P12956 XRCC6_HUMAN</a>   | 2 | 0.2  | 0.2  | 0.06 | 0.06 | 0.06  |
| 318 | 5494 PPM1A     | <a href="#">sp P35813 PPM1A_HUMAN</a>   | 2 | 0.2  | 0.19 | 0.06 | 0.06 | -0.39 |
| 319 | 5495 PPM1B     | <a href="#">sp O75688 PPM1B_HUMAN</a>   | 4 | 0.25 | 0.24 | 0.06 | 0.06 | -0.69 |
| 320 | 8518 IKBKAP    | <a href="#">sp O95163 ELP1_HUMAN</a>    | 1 | 0.26 | 0.25 | 0.06 | 0.06 | 1.54  |
| 321 | 1108 CHD4      | <a href="#">sp Q14839-2 CHD4_HUMAN</a>  | 2 | 0.21 | 0.2  | 0.06 | 0.06 | -0.3  |
| 322 | 2821 GPI       | <a href="#">sp P06744 G6PI_HUMAN</a>    | 1 | 0.26 | 0.25 | 0.06 | 0.06 | 0.78  |
| 323 | 2314 FLII      | <a href="#">sp Q13045 FLII_HUMAN</a>    | 2 | 0.29 | 0.28 | 0.06 | 0.06 | 2.84  |
| 324 | 8570 KHSRP     | <a href="#">sp Q92945-2 FUBP2_HUMAN</a> | 1 | 0.17 | 0.17 | 0.06 | 0.06 | -0.07 |
| 325 | 92597 MOBKL1A  | <a href="#">sp Q7L9L4 MOL1A_HUMAN</a>   | 1 | 0.18 | 0.17 | 0.06 | 0.06 | 0.89  |
| 326 | 51253 MRPL37   | <a href="#">sp Q9BZE1 RM37_HUMAN</a>    | 1 | 0.26 | 0.25 | 0.06 | 0.06 | 1.39  |
| 327 | 7874 USP7      | <a href="#">sp Q93009 UBP7_HUMAN</a>    | 1 | 0.25 | 0.28 | 0.05 | 0.06 | 0.03  |
| 328 | 283458 NME2P1  | <a href="#">sp O60361 NDK8_HUMAN</a>    | 1 | 0.27 | 0.26 | 0.06 | 0.06 | 2.16  |
| 329 | 4513 COX2      | <a href="#">sp P00403 COX2_HUMAN</a>    | 1 | 0.26 | 0.25 | 0.06 | 0.06 | 1.29  |
| 330 | 4697 NDUFA4    | <a href="#">sp O00483 NDUA4_HUMAN</a>   | 1 | 0.17 | 0.17 | 0.06 | 0.06 | 0.72  |
| 331 | 440 ASNS       | <a href="#">sp P08243 ASNS_HUMAN</a>    | 1 | 0.26 | 0.25 | 0.06 | 0.06 | 1.54  |
| 332 | 7094 TLN1      | <a href="#">sp Q9Y490 TLN1_HUMAN</a>    | 1 | 0.26 | 0.25 | 0.06 | 0.06 | 0.94  |
| 333 | 27101 CACYBP   | <a href="#">sp Q9HB71 CYBP_HUMAN</a>    | 1 | 0.28 | 0.27 | 0.06 | 0.06 | 1.69  |
| 334 | 8239 USP9X     | <a href="#">sp Q93008-1 USP9X_HUMAN</a> | 1 | 0.25 | 0.27 | 0.05 | 0.06 | 0.23  |
| 335 | 55269 PSPC1    | <a href="#">sp Q8WXF1-2 PSPC1_HUMAN</a> | 1 | 0.28 | 0.27 | 0.06 | 0.06 | 1.49  |
| 336 | 1495 CTNNA1    | <a href="#">sp P35221-2 CTNA1_HUMAN</a> | 1 | 0.21 | 0.2  | 0.05 | 0.05 | 0.81  |
| 337 | 7534 YWHAZ     | <a href="#">sp P63104 1433Z_HUMAN</a>   | 3 | 0.22 | 0.21 | 0.05 | 0.05 | 0.73  |
| 338 | 2956 MSH6      | <a href="#">sp P52701-2 MSH6_HUMAN</a>  | 1 | 0.2  | 0.21 | 0.04 | 0.05 | -0.1  |
| 339 | 5689 PSMB1     | <a href="#">sp P20618 PSB1_HUMAN</a>    | 2 | 0.18 | 0.17 | 0.05 | 0.05 | 0.37  |
| 340 | 5635 PRPSAP1   | <a href="#">sp Q14558-2 KPRA_HUMAN</a>  | 1 | 0.22 | 0.21 | 0.05 | 0.05 | 0.08  |
| 341 | 5709 PSMD3     | <a href="#">sp O43242 PSMD3_HUMAN</a>   | 3 | 0.21 | 0.2  | 0.05 | 0.05 | 0.11  |
| 342 | 22950 SLC4A1AP | <a href="#">sp Q9BWU0 NADAP_HUMAN</a>   | 1 | 0.25 | 0.24 | 0.05 | 0.05 | 1.67  |
| 343 | 821 CANX       | <a href="#">sp P27824 CALX_HUMAN</a>    | 1 | 0.16 | 0.15 | 0.05 | 0.05 | 0.09  |
| 344 | 498 ATP5A1     | <a href="#">sp P25705 ATPA_HUMAN</a>    | 4 | 0.23 | 0.22 | 0.05 | 0.05 | -0.53 |
| 345 | 2058 EPRS      | <a href="#">sp P07814 SYEP_HUMAN</a>    | 3 | 0.21 | 0.2  | 0.05 | 0.05 | -0.43 |
| 346 | 7295 TXN       | <a href="#">sp P10599 THIO_HUMAN</a>    | 4 | 0.23 | 0.22 | 0.05 | 0.05 | 0.66  |
| 347 | 9219 MTA2      | <a href="#">sp O94776 MTA2_HUMAN</a>    | 2 | 0.19 | 0.18 | 0.05 | 0.05 | 0.36  |
| 348 | 292 SLC25A5    | <a href="#">sp P05141 ADT2_HUMAN</a>    | 3 | 0.2  | 0.2  | 0.05 | 0.05 | -0.33 |
| 349 | 3939 LDHA      | <a href="#">sp P00338-2 LDHA_HUMAN</a>  | 1 | 0.15 | 0.15 | 0.05 | 0.05 | 0.1   |
| 350 | 2618 GART      | <a href="#">sp P22102 PUR2_HUMAN</a>    | 2 | 0.19 | 0.18 | 0.05 | 0.05 | 0.52  |

|     |               |                                         |   |      |      |      |      |       |
|-----|---------------|-----------------------------------------|---|------|------|------|------|-------|
| 351 | 79577 CDC73   | <a href="#">sp Q6P1J9 CDC73_HUMAN</a>   | 1 | 0.23 | 0.23 | 0.05 | 0.05 | 0.62  |
| 352 | 1639 DCTN1    | <a href="#">sp Q14203-2 DCTN1_HUMAN</a> | 2 | 0.18 | 0.18 | 0.05 | 0.05 | -0.22 |
| 353 | 5903 RANBP2   | <a href="#">sp P49792 RBP2_HUMAN</a>    | 1 | 0.23 | 0.22 | 0.05 | 0.05 | 1.36  |
| 354 | 5718 PSMD12   | <a href="#">sp O00232 PSD12_HUMAN</a>   | 3 | 0.21 | 0.2  | 0.05 | 0.05 | 0.21  |
| 355 | 10240 MRPS31  | <a href="#">sp Q92665 RT31_HUMAN</a>    | 1 | 0.21 | 0.2  | 0.05 | 0.05 | 1.4   |
| 356 | 9774 BCLAF1   | <a href="#">sp Q9NYF8-2 BCLF1_HUMAN</a> | 3 | 0.22 | 0.21 | 0.05 | 0.05 | -0.56 |
| 357 | 26227 PHGDH   | <a href="#">sp O43175 SERA_HUMAN</a>    | 3 | 0.21 | 0.2  | 0.05 | 0.05 | -0.08 |
| 358 | 7818 DAP3     | <a href="#">sp P51398 RT29_HUMAN</a>    | 1 | 0.21 | 0.2  | 0.05 | 0.05 | 0.82  |
| 359 | 8663 EIF3C    | <a href="#">sp Q99613 EIF3C_HUMAN</a>   | 4 | 0.24 | 0.23 | 0.05 | 0.05 | -0.57 |
| 360 | 8662 EIF3B    | <a href="#">sp P55884-2 EIF3B_HUMAN</a> | 4 | 0.23 | 0.22 | 0.05 | 0.05 | -0.76 |
| 361 | 4691 NCL      | <a href="#">sp P19338 NUCL_HUMAN</a>    | 3 | 0.21 | 0.2  | 0.05 | 0.05 | -0.09 |
| 362 | 4722 NDUFS3   | <a href="#">sp O75489 NDUS3_HUMAN</a>   | 1 | 0.21 | 0.2  | 0.05 | 0.05 | 0.82  |
| 363 | 5634 PRPS2    | <a href="#">sp P11908-2 PRPS2_HUMAN</a> | 1 | 0.22 | 0.21 | 0.05 | 0.05 | 0.06  |
| 364 | 4673 NAP1L1   | <a href="#">sp P55209 NP1L1_HUMAN</a>   | 3 | 0.22 | 0.21 | 0.05 | 0.05 | 1.61  |
| 365 | 4904 YBX1     | <a href="#">sp P67809 YBOX1_HUMAN</a>   | 2 | 0.2  | 0.19 | 0.05 | 0.05 | 0.18  |
| 366 | 9861 PSMD6    | <a href="#">sp Q15008 PSMD6_HUMAN</a>   | 2 | 0.19 | 0.18 | 0.05 | 0.05 | 0.61  |
| 367 | 5315 PKM2     | <a href="#">tr E7EUQ8 E7EUQ8_HUMAN</a>  | 3 | 0.21 | 0.2  | 0.05 | 0.05 | -0.48 |
| 368 | 4678 NASP     | <a href="#">sp P49321-3 NASP_HUMAN</a>  | 2 | 0.19 | 0.19 | 0.05 | 0.05 | 0.95  |
| 369 | 7453 WARS     | <a href="#">sp P23381-2 SYWC_HUMAN</a>  | 2 | 0.19 | 0.18 | 0.05 | 0.05 | -0.03 |
| 370 | 4052 LTBP1    | <a href="#">sp Q14766-4 LTBP1_HUMAN</a> | 2 | 0.19 | 0.18 | 0.05 | 0.05 | -0.35 |
| 371 | 55746 NUP133  | <a href="#">sp Q8WUM0 NU133_HUMAN</a>   | 1 | 0.23 | 0.22 | 0.05 | 0.05 | 1.36  |
| 372 | 9524 TECR     | <a href="#">sp Q9NZ01-2 TECR_HUMAN</a>  | 1 | 0.21 | 0.2  | 0.05 | 0.05 | 0.79  |
| 373 | 3932 LCK      | <a href="#">sp P06239-3 LCK_HUMAN</a>   | 1 | 0.22 | 0.21 | 0.05 | 0.05 | 1.47  |
| 374 | 10592 SMC2    | <a href="#">sp O95347-2 SMC2_HUMAN</a>  | 2 | 0.21 | 0.2  | 0.05 | 0.05 | 0.71  |
| 375 | 51386 EIF3L   | <a href="#">sp Q9Y262 EIF3L_HUMAN</a>   | 3 | 0.2  | 0.2  | 0.05 | 0.05 | -0.89 |
| 376 | 6181 RPLP2    | <a href="#">sp P05387 RLA2_HUMAN</a>    | 2 | 0.19 | 0.18 | 0.05 | 0.05 | 0.64  |
| 377 | 23450 SF3B3   | <a href="#">sp Q15393 SF3B3_HUMAN</a>   | 4 | 0.23 | 0.22 | 0.05 | 0.05 | -0.22 |
| 378 | 5832 ALDH18A1 | <a href="#">sp P54886-2 P5CS_HUMAN</a>  | 1 | 0.25 | 0.24 | 0.05 | 0.05 | 0.88  |
| 379 | 54623 PAF1    | <a href="#">sp Q8N7H5-2 PAF1_HUMAN</a>  | 1 | 0.19 | 0.2  | 0.04 | 0.05 | 0.29  |
| 380 | 6187 RPS2     | <a href="#">sp P15880 RS2_HUMAN</a>     | 2 | 0.18 | 0.18 | 0.04 | 0.05 | -0.12 |
| 381 | 23451 SF3B1   | <a href="#">sp O75533 SF3B1_HUMAN</a>   | 3 | 0.21 | 0.2  | 0.05 | 0.05 | -0.09 |
| 382 | 3615 IMPDH2   | <a href="#">sp P12268 IMDH2_HUMAN</a>   | 1 | 0.21 | 0.2  | 0.05 | 0.05 | 0.68  |
| 383 | 1933 EEF1B2   | <a href="#">sp P24534 EF1B_HUMAN</a>    | 4 | 0.23 | 0.22 | 0.05 | 0.05 | 0.58  |
| 384 | 23107 MRPS27  | <a href="#">sp Q92552 RT27_HUMAN</a>    | 1 | 0.21 | 0.2  | 0.05 | 0.05 | 0.87  |
| 385 | 10735 STAG2   | <a href="#">sp Q8N3U4-2 STAG2_HUMAN</a> | 1 | 0.22 | 0.21 | 0.05 | 0.05 | 0.97  |
| 386 | 5708 PSMD2    | <a href="#">sp Q13200 PSMD2_HUMAN</a>   | 2 | 0.18 | 0.18 | 0.05 | 0.05 | -0.29 |
| 387 | 10049 DNAJB6  | <a href="#">sp O75190-2 DNJB6_HUMAN</a> | 1 | 0.21 | 0.2  | 0.05 | 0.05 | 0.98  |
| 388 | 51150 SDF4    | <a href="#">sp Q9BRK5-2 CAB45_HUMAN</a> | 1 | 0.25 | 0.24 | 0.05 | 0.05 | 1.16  |
| 389 | 488 ATP2A2    | <a href="#">sp P16615-2 AT2A2_HUMAN</a> | 1 | 0.16 | 0.22 | 0.03 | 0.05 | -0.2  |
| 390 | 6731 SRP72    | <a href="#">sp O76094 SRP72_HUMAN</a>   | 1 | 0.24 | 0.23 | 0.05 | 0.05 | 1.29  |
| 391 | 5464 PPA1     | <a href="#">sp Q15181 IPYR_HUMAN</a>    | 1 | 0.15 | 0.15 | 0.05 | 0.05 | 0.19  |
| 392 | 23269 MGA     | <a href="#">sp Q8IWI9-2 MGAP_HUMAN</a>  | 1 | 0.15 | 0.15 | 0.05 | 0.05 | -0.21 |
| 393 | 5710 PSMD4    | <a href="#">sp P55036 PSMD4_HUMAN</a>   | 2 | 0.19 | 0.18 | 0.05 | 0.05 | 0.35  |
| 394 | 7407 VARS     | <a href="#">sp P26640 SYVC_HUMAN</a>    | 2 | 0.18 | 0.18 | 0.05 | 0.05 | 0.32  |

|     |        |          |                                               |   |      |      |      |      |       |
|-----|--------|----------|-----------------------------------------------|---|------|------|------|------|-------|
| 395 | 26517  | TIMM13   | <a href="#">sp Q9Y5L4 TIM13_HUMAN</a>         | 1 | 0.19 | 0.2  | 0.04 | 0.05 | 0.09  |
| 396 | 2035   | EPB41    | <a href="#">sp P11171-2 41_HUMAN</a>          | 1 | 0.24 | 0.23 | 0.05 | 0.05 | 0.52  |
| 397 | 22827  | PUF60    | <a href="#">sp Q9UHX1-2 PUF60_HUMAN</a>       | 1 | 0.21 | 0.2  | 0.05 | 0.05 | 0.58  |
| 398 | 5805   | PTS      | <a href="#">sp Q03393 PTPS_HUMAN</a>          | 2 | 0.19 | 0.18 | 0.05 | 0.05 | 0.75  |
| 399 | 11091  | WDR5     | <a href="#">sp P61964 WDR5_HUMAN</a>          | 1 | 0.24 | 0.23 | 0.05 | 0.05 | 1.42  |
| 400 | 7957   | EPM2A    | <a href="#">sp O95278-2 EPM2A_HUMAN</a>       | 1 | 0.24 | 0.23 | 0.05 | 0.05 | 1.08  |
| 401 | 1665   | DHX15    | <a href="#">sp O43143 DHX15_HUMAN</a>         | 2 | 0.19 | 0.19 | 0.05 | 0.05 | 0.88  |
| 402 | 6748   | SSR4     | <a href="#">sp P51571 SSRD_HUMAN</a>          | 2 | 0.19 | 0.18 | 0.05 | 0.05 | 0.63  |
| 403 | 1457   | CSNK2A1  | <a href="#">sp P68400 CSK21_HUMAN</a>         | 1 | 0.21 | 0.2  | 0.05 | 0.05 | 0.34  |
| 404 | 79751  | SLC25A22 | <a href="#">sp Q9H936 GHC1_HUMAN</a>          | 1 | 0.24 | 0.23 | 0.05 | 0.05 | 1.17  |
| 405 | 8664   | EIF3D    | <a href="#">sp O15371 EIF3D_HUMAN</a>         | 3 | 0.21 | 0.2  | 0.05 | 0.05 | -0.46 |
| 406 | 10342  | TFG      | <a href="#">sp Q92734 TFG_HUMAN</a>           | 1 | 0.25 | 0.24 | 0.05 | 0.05 | 0.66  |
| 407 | 51164  | DCTN4    | <a href="#">sp Q9UJW0-2 DCTN4_HUMAN</a>       | 1 | 0.16 | 0.22 | 0.04 | 0.05 | 0.01  |
| 408 | 873    | CBR1     | <a href="#">sp P16152 CBR1_HUMAN</a>          | 1 | 0.23 | 0.22 | 0.05 | 0.05 | 0.81  |
| 409 | 4174   | MCM5     | <a href="#">sp P33992 MCM5_HUMAN</a>          | 1 | 0.23 | 0.22 | 0.05 | 0.05 | 0.72  |
| 410 | 5537   | PPP6C    | <a href="#">sp O00743-3 PPP6_HUMAN</a>        | 1 | 0.21 | 0.2  | 0.05 | 0.05 | 0.59  |
| 411 | 142    | PARP1    | <a href="#">sp P09874 PARP1_HUMAN</a>         | 1 | 0.16 | 0.15 | 0.05 | 0.05 | -0.07 |
| 412 | 4085   | MAD2L1   | <a href="#">sp Q13257 MD2L1_HUMAN</a>         | 1 | 0.25 | 0.24 | 0.05 | 0.05 | 0.96  |
| 413 | 6176   | RPLP1    | <a href="#">sp P05386 RLA1_HUMAN</a>          | 1 | 0.16 | 0.15 | 0.04 | 0.04 | 0.55  |
| 414 | 6188   | RPS3     | <a href="#">sp P23396 RS3_HUMAN</a>           | 3 | 0.2  | 0.19 | 0.04 | 0.04 | -0.85 |
| 415 | 5688   | PSMA7    | <a href="#">sp O14818-2 PSA7_HUMAN</a>        | 2 | 0.17 | 0.17 | 0.04 | 0.04 | 0.51  |
| 416 | 5706   | PSMC6    | <a href="#">sp P62333 PRS10_HUMAN</a>         | 2 | 0.18 | 0.17 | 0.04 | 0.04 | -0.25 |
| 417 | 5682   | PSMA1    | <a href="#">sp P25786-2 PSA1_HUMAN</a>        | 1 | 0.15 | 0.14 | 0.04 | 0.04 | 0.41  |
| 418 | 293    | SLC25A6  | <a href="#">sp P12236 ADT3_HUMAN</a>          | 2 | 0.17 | 0.16 | 0.04 | 0.04 | -0.56 |
| 419 | 5931   | RBBP7    | <a href="#">sp Q16576 RBBP7_HUMAN</a>         | 1 | 0.14 | 0.14 | 0.04 | 0.04 | -0.43 |
| 420 | 8666   | EIF3G    | <a href="#">sp O75821 EIF3G_HUMAN</a>         | 2 | 0.17 | 0.16 | 0.04 | 0.04 | -0.39 |
| 421 | 7520   | XRCC5    | <a href="#">sp P13010 XRCC5_HUMAN</a>         | 1 | 0.18 | 0.18 | 0.04 | 0.04 | -0.03 |
| 422 | 9967   | THRAP3   | <a href="#">sp Q9Y2W1 TR150_HUMAN</a>         | 2 | 0.18 | 0.17 | 0.04 | 0.04 | -0.87 |
| 423 | 5518   | PPP2R1A  | <a href="#">sp P30153 2AAA_HUMAN</a>          | 1 | 0.17 | 0.16 | 0.04 | 0.04 | 0.27  |
| 424 | 5052   | PRDX1    | <a href="#">sp Q06830 PRDX1_HUMAN</a>         | 2 | 0.16 | 0.16 | 0.04 | 0.04 | -0.87 |
| 425 | 3837   | KPNB1    | <a href="#">sp Q14974 IMB1_HUMAN</a>          | 2 | 0.19 | 0.18 | 0.04 | 0.04 | 0.38  |
| 426 | 10856  | RUVBL2   | <a href="#">sp Q9Y230 RUVB2_HUMAN</a>         | 2 | 0.17 | 0.16 | 0.04 | 0.04 | -0.21 |
| 427 | 55291  | PPP6R3   | <a href="#">sp Q5H9R7-2 PP6R3_HUMAN</a>       | 1 | 0.19 | 0.19 | 0.04 | 0.04 | 0.12  |
| 428 | 6191   | RPS4X    | <a href="#">sp P62701 RS4X_HUMAN</a>          | 2 | 0.2  | 0.19 | 0.04 | 0.04 | 0.05  |
| 429 | 9255   | AIMP1    | <a href="#">sp Q12904 AIMP1_HUMAN</a>         | 1 | 0.17 | 0.16 | 0.04 | 0.04 | 0.82  |
| 430 | 7284   | TUFM     | <a href="#">sp P49411 EFTU_HUMAN</a>          | 1 | 0.14 | 0.14 | 0.04 | 0.04 | -0.43 |
| 431 | 11052  | CPSF6    | <a href="#">sp Q16630-2 CPSF6_HUMAN</a>       | 1 | 0.18 | 0.17 | 0.04 | 0.04 | 0.75  |
| 432 | 3838   | KPNA2    | <a href="#">sp P52292 IMA2_HUMAN</a>          | 1 | 0.17 | 0.17 | 0.04 | 0.04 | 0.32  |
| 433 | 51520  | LARS     | <a href="#">sp Q9P2J5 SYLC_HUMAN</a>          | 2 | 0.18 | 0.17 | 0.04 | 0.04 | -0.66 |
| 434 | 139324 | HDX      | <a href="#">sp Q7Z353-2 HDX_HUMAN</a>         | 1 | 0.17 | 0.17 | 0.04 | 0.04 | 0.11  |
| 435 | 140465 | MYL6B    | <a href="#">sp P14649 MYL6B_HUMAN</a>         | 1 | 0.2  | 0.19 | 0.04 | 0.04 | 0.82  |
| 436 | 989    |          | 7-Sep <a href="#">sp Q16181-2 SEPT7_HUMAN</a> | 1 | 0.17 | 0.17 | 0.04 | 0.04 | 0.49  |
| 437 | 5478   | PPIA     | <a href="#">sp P62937 PPIA_HUMAN</a>          | 2 | 0.17 | 0.16 | 0.04 | 0.04 | 0.34  |
| 438 | 832    | CAPZB    | <a href="#">sp P47756-2 CAPZB_HUMAN</a>       | 1 | 0.15 | 0.17 | 0.03 | 0.04 | 0.06  |

|     |        |          |                                               |   |      |      |      |      |       |
|-----|--------|----------|-----------------------------------------------|---|------|------|------|------|-------|
| 439 | 372    | ARCN1    | <a href="#">sp P48444 COPD_HUMAN</a>          | 1 | 0.18 | 0.17 | 0.04 | 0.04 | 0.35  |
| 440 | 7514   | XPO1     | <a href="#">sp O14980 XPO1_HUMAN</a>          | 1 | 0.18 | 0.17 | 0.04 | 0.04 | 0.14  |
| 441 | 56945  | MRPS22   | <a href="#">sp P82650 RT22_HUMAN</a>          | 1 | 0.16 | 0.16 | 0.04 | 0.04 | 0.62  |
| 442 | 9588   | PRDX6    | <a href="#">sp P30041 PRDX6_HUMAN</a>         | 2 | 0.17 | 0.16 | 0.04 | 0.04 | -0.29 |
| 443 | 4522   | MTHFD1   | <a href="#">sp P11586 C1TC_HUMAN</a>          | 1 | 0.17 | 0.16 | 0.04 | 0.04 | 0.17  |
| 444 | 7317   | UBA1     | <a href="#">sp P22314 UBA1_HUMAN</a>          | 1 | 0.15 | 0.16 | 0.03 | 0.04 | -0.15 |
| 445 | 4134   | MAP4     | <a href="#">sp P27816-2 MAP4_HUMAN</a>        | 1 | 0.15 | 0.14 | 0.04 | 0.04 | 0.31  |
| 446 | 7314   | UBB      | <a href="#">sp P0CG47 UBB_HUMAN</a>           | 2 | 0.17 | 0.17 | 0.04 | 0.04 | -0.22 |
| 447 | 6229   | RPS24    | <a href="#">sp P62847-2 RS24_HUMAN</a>        | 1 | 0.14 | 0.14 | 0.04 | 0.04 | 0.34  |
| 448 | 6634   | SNRPD3   | <a href="#">sp P62318 SMD3_HUMAN</a>          | 2 | 0.18 | 0.17 | 0.04 | 0.04 | 0.8   |
| 449 | 5250   | SLC25A3  | <a href="#">sp Q00325-2 MPCP_HUMAN</a>        | 2 | 0.17 | 0.17 | 0.04 | 0.04 | 0.06  |
| 450 | 10801  |          | 9-Sep <a href="#">sp Q9UHD8-2 SEPT9_HUMAN</a> | 1 | 0.16 | 0.16 | 0.04 | 0.04 | 0.39  |
| 451 | 5589   | PRKCSH   | <a href="#">sp P14314 GLU2B_HUMAN</a>         | 1 | 0.17 | 0.16 | 0.04 | 0.04 | 0.33  |
| 452 | 84844  | PHF5A    | <a href="#">sp Q7RTV0 PHF5A_HUMAN</a>         | 1 | 0.16 | 0.16 | 0.04 | 0.04 | 0.44  |
| 453 | 6231   | RPS26    | <a href="#">sp P62854 RS26_HUMAN</a>          | 1 | 0.19 | 0.18 | 0.04 | 0.04 | 1.15  |
| 454 | 140807 | KRT72    | <a href="#">sp Q14CN4-2 K2C72_HUMAN</a>       | 1 | 0.19 | 0.18 | 0.04 | 0.04 | 0.59  |
| 455 | 1981   | EIF4G1   | <a href="#">sp Q04637-3 IF4G1_HUMAN</a>       | 1 | 0.19 | 0.18 | 0.04 | 0.04 | 0.64  |
| 456 | 11171  | STRAP    | <a href="#">sp Q9Y3F4 STRAP_HUMAN</a>         | 1 | 0.18 | 0.17 | 0.04 | 0.04 | 0.47  |
| 457 | 6949   | TCOF1    | <a href="#">sp Q13428-2 TCOF_HUMAN</a>        | 1 | 0.14 | 0.13 | 0.04 | 0.04 | -0.25 |
| 458 | 11140  | CDC37    | <a href="#">sp Q16543 CDC37_HUMAN</a>         | 1 | 0.17 | 0.16 | 0.04 | 0.04 | 0.82  |
| 459 | 226    | ALDOA    | <a href="#">sp P04075 ALDOA_HUMAN</a>         | 1 | 0.18 | 0.17 | 0.04 | 0.04 | 0.23  |
| 460 | 83481  | EPPK1    | <a href="#">sp P58107 EPIPL_HUMAN</a>         | 1 | 0.18 | 0.17 | 0.04 | 0.04 | 0.13  |
| 461 | 5690   | PSMB2    | <a href="#">sp P49721 PSB2_HUMAN</a>          | 1 | 0.17 | 0.16 | 0.04 | 0.04 | 0.89  |
| 462 | 5684   | PSMA3    | <a href="#">sp P25788-2 PSA3_HUMAN</a>        | 1 | 0.17 | 0.16 | 0.04 | 0.04 | 0.68  |
| 463 | 9584   | RBM39    | <a href="#">sp Q14498-2 RBM39_HUMAN</a>       | 1 | 0.17 | 0.18 | 0.04 | 0.04 | 0.16  |
| 464 | 9733   | SART3    | <a href="#">sp Q15020 SART3_HUMAN</a>         | 1 | 0.19 | 0.18 | 0.04 | 0.04 | 0.61  |
| 465 | 23397  | NCAPH    | <a href="#">sp Q15003 CND2_HUMAN</a>          | 1 | 0.18 | 0.17 | 0.04 | 0.04 | 1.02  |
| 466 | 79861  | TUBAL3   | <a href="#">sp A6NHL2-2 TBAL3_HUMAN</a>       | 1 | 0.15 | 0.14 | 0.03 | 0.03 | -0.23 |
| 467 | 9126   | SMC3     | <a href="#">sp Q9UQE7 SMC3_HUMAN</a>          | 1 | 0.13 | 0.13 | 0.03 | 0.03 | -0.41 |
| 468 | 5216   | PFN1     | <a href="#">sp P07737 PROF1_HUMAN</a>         | 1 | 0.16 | 0.15 | 0.03 | 0.03 | 0.04  |
| 469 | 10549  | PRDX4    | <a href="#">sp Q13162 PRDX4_HUMAN</a>         | 1 | 0.15 | 0.14 | 0.03 | 0.03 | -0.26 |
| 470 | 5928   | RBBP4    | <a href="#">sp Q09028-3 RBBP4_HUMAN</a>       | 1 | 0.13 | 0.12 | 0.03 | 0.03 | -0.6  |
| 471 | 1072   | CFL1     | <a href="#">sp P23528 COF1_HUMAN</a>          | 1 | 0.13 | 0.12 | 0.03 | 0.03 | -0.35 |
| 472 | 55352  | C17orf79 | <a href="#">sp Q9NQ92 COPR5_HUMAN</a>         | 1 | 0.13 | 0.13 | 0.03 | 0.03 | -0.49 |
| 473 | 6741   | SSB      | <a href="#">sp P05455 LA_HUMAN</a>            | 1 | 0.16 | 0.15 | 0.03 | 0.03 | 0.03  |
| 474 | 6874   | TAF4     | <a href="#">sp O00268 TAF4_HUMAN</a>          | 1 | 0.14 | 0.14 | 0.03 | 0.03 | -0.63 |
| 475 | 5901   | RAN      | <a href="#">sp P62826 IRAN_HUMAN</a>          | 1 | 0.13 | 0.12 | 0.03 | 0.03 | -0.08 |
| 476 | 2023   | ENO1     | <a href="#">sp P06733-2 ENOA_HUMAN</a>        | 1 | 0.13 | 0.14 | 0.03 | 0.03 | -0.42 |
| 477 | 6745   | SSR1     | <a href="#">sp P43307 SSRA_HUMAN</a>          | 1 | 0.14 | 0.13 | 0.03 | 0.03 | 0.13  |
| 478 | 1973   | EIF4A1   | <a href="#">sp P60842 IF4A1_HUMAN</a>         | 1 | 0.15 | 0.14 | 0.03 | 0.03 | -0.11 |
| 479 | 57459  | GATAD2B  | <a href="#">sp Q8WXI9 P66B_HUMAN</a>          | 1 | 0.16 | 0.15 | 0.03 | 0.03 | 0.07  |
| 480 | 7431   | VIM      | <a href="#">sp P08670 VIME_HUMAN</a>          | 1 | 0.12 | 0.12 | 0.03 | 0.03 | -0.66 |
| 481 | 6222   | RPS18    | <a href="#">sp P62269 RS18_HUMAN</a>          | 1 | 0.12 | 0.12 | 0.03 | 0.03 | -0.65 |
| 482 | 3856   | KRT8     | <a href="#">sp P05787 K2C8_HUMAN</a>          | 1 | 0.12 | 0.12 | 0.03 | 0.03 | -0.27 |

|     |        |         |                                               |   |      |      |      |      |       |
|-----|--------|---------|-----------------------------------------------|---|------|------|------|------|-------|
| 483 | 10992  | SF3B2   | <a href="#">sp Q13435 SF3B2_HUMAN</a>         | 1 | 0.14 | 0.14 | 0.03 | 0.03 | -0.28 |
| 484 | 6737   | TRIM21  | <a href="#">sp P19474 RO52_HUMAN</a>          | 1 | 0.13 | 0.12 | 0.03 | 0.03 | -0.86 |
| 485 | 26292  | MYCBP   | <a href="#">sp Q99417 MYCBP_HUMAN</a>         | 1 | 0.14 | 0.13 | 0.03 | 0.03 | -0.22 |
| 486 | 3178   | HNRNPA1 | <a href="#">sp P09651-2 ROA1_HUMAN</a>        | 1 | 0.12 | 0.12 | 0.03 | 0.03 | -0.48 |
| 487 | 1153   | CIRBP   | <a href="#">sp Q14011 CIRBP_HUMAN</a>         | 1 | 0.13 | 0.12 | 0.03 | 0.03 | -0.31 |
| 488 | 6206   | RPS12   | <a href="#">sp P25398 RS12_HUMAN</a>          | 1 | 0.14 | 0.13 | 0.03 | 0.03 | -0.21 |
| 489 | 1213   | CLTC    | <a href="#">sp Q00610-2 CLH1_HUMAN</a>        | 1 | 0.13 | 0.12 | 0.03 | 0.03 | -0.89 |
| 490 | 5719   | PSMD13  | <a href="#">sp Q9UNM6-2 PSD13_HUMAN</a>       | 1 | 0.13 | 0.13 | 0.03 | 0.03 | -0.23 |
| 491 | 4869   | NPM1    | <a href="#">sp P06748-2 NPM_HUMAN</a>         | 1 | 0.13 | 0.13 | 0.03 | 0.03 | -0.34 |
| 492 | 3646   | EIF3E   | <a href="#">sp P60228 EIF3E_HUMAN</a>         | 1 | 0.12 | 0.12 | 0.03 | 0.03 | -1.11 |
| 493 | 6500   | SKP1    | <a href="#">sp P63208 SKP1_HUMAN</a>          | 1 | 0.15 | 0.14 | 0.03 | 0.03 | 0.37  |
| 494 | 6633   | SNRPD2  | <a href="#">sp P62316 SMD2_HUMAN</a>          | 1 | 0.14 | 0.13 | 0.03 | 0.03 | -0.36 |
| 495 | 10051  | SMC4    | <a href="#">sp Q9NTJ3 SMC4_HUMAN</a>          | 1 | 0.13 | 0.13 | 0.03 | 0.03 | -0.05 |
| 496 | 53615  | MBD3    | <a href="#">sp O95983-2 MBD3_HUMAN</a>        | 1 | 0.16 | 0.15 | 0.03 | 0.03 | 0.45  |
| 497 | 3251   | HPRT1   | <a href="#">sp P00492 HPRT_HUMAN</a>          | 1 | 0.16 | 0.15 | 0.03 | 0.03 | 0.09  |
| 498 | 26135  | SERBP1  | <a href="#">sp Q8NC51-2 PAIRB_HUMAN</a>       | 1 | 0.12 | 0.12 | 0.03 | 0.03 | -0.15 |
| 499 | 4735   |         | 2-Sep <a href="#">sp Q15019-2 SEPT2_HUMAN</a> | 1 | 0.15 | 0.14 | 0.03 | 0.03 | 0.04  |
| 500 | 6635   | SNRPE   | <a href="#">sp P62304 RUXE_HUMAN</a>          | 1 | 0.14 | 0.14 | 0.03 | 0.03 | -0.12 |
| 501 | 2597   | GAPDH   | <a href="#">sp P04406 G3P_HUMAN</a>           | 1 | 0.13 | 0.12 | 0.03 | 0.03 | -0.43 |
| 502 | 6234   | RPS28   | <a href="#">sp P62857 RS28_HUMAN</a>          | 1 | 0.12 | 0.12 | 0.03 | 0.03 | -0.36 |
| 503 | 144455 | E2F7    | <a href="#">sp Q96AV8-2 E2F7_HUMAN</a>        | 1 | 0.16 | 0.15 | 0.03 | 0.03 | 0.19  |
| 504 | 3184   | HNRNPD  | <a href="#">sp Q14103-2 HNRPD_HUMAN</a>       | 1 | 0.13 | 0.12 | 0.03 | 0.03 | -0.5  |
| 505 | 8243   | SMC1A   | <a href="#">sp Q14683 SMC1A_HUMAN</a>         | 1 | 0.13 | 0.12 | 0.03 | 0.03 | -0.17 |
| 506 | 5303   | PIN4    | <a href="#">sp Q9Y237-2 PIN4_HUMAN</a>        | 1 | 0.15 | 0.14 | 0.03 | 0.03 | 0.33  |
| 507 | 103910 | MYL12B  | <a href="#">sp O14950 ML12B_HUMAN</a>         | 1 | 0.14 | 0.13 | 0.03 | 0.03 | 0.02  |
| 508 | 5693   | PSMB5   | <a href="#">sp P28074 PSB5_HUMAN</a>          | 1 | 0.14 | 0.13 | 0.03 | 0.03 | -0.28 |
| 509 | 51639  | SF3B14  | <a href="#">sp Q9Y3B4 PM14_HUMAN</a>          | 1 | 0.13 | 0.13 | 0.03 | 0.03 | 0.16  |
| 510 | 5591   | PRKDC   | <a href="#">sp P78527-2 PRKDC_HUMAN</a>       | 1 | 0.13 | 0.13 | 0.03 | 0.03 | -0.78 |
| 511 | 6204   | RPS10   | <a href="#">sp P46783 RS10_HUMAN</a>          | 1 | 0.13 | 0.13 | 0.03 | 0.03 | -0.17 |
| 512 | 6418   | SET     | <a href="#">sp Q01105-2 SET_HUMAN</a>         | 1 | 0.15 | 0.14 | 0.03 | 0.03 | 0.04  |
| 513 | 9349   | RPL23   | <a href="#">sp P62829 RL23_HUMAN</a>          | 1 | 0.12 | 0.11 | 0.03 | 0.03 | -0.74 |
| 514 | 1654   | DDX3X   | <a href="#">sp O00571 DDX3X_HUMAN</a>         | 1 | 0.12 | 0.12 | 0.03 | 0.03 | -0.36 |
| 515 | 9112   | MTA1    | <a href="#">sp Q13330 MTA1_HUMAN</a>          | 1 | 0.14 | 0.13 | 0.03 | 0.03 | -0.39 |
| 516 | 57606  | SLAIN2  | <a href="#">sp Q9P270 SLAI2_HUMAN</a>         | 1 | 0.14 | 0.14 | 0.03 | 0.03 | -0.22 |
| 517 | 23318  | ZCCHC11 | <a href="#">sp Q5TAX3-2 TUT4_HUMAN</a>        | 1 | 0.15 | 0.15 | 0.03 | 0.03 | 0.68  |
| 518 | 6421   | SFPQ    | <a href="#">sp P23246-2 SFPQ_HUMAN</a>        | 1 | 0.13 | 0.12 | 0.03 | 0.03 | -0.22 |
| 519 | 6742   | SSBP1   | <a href="#">sp Q04837 SSBP_HUMAN</a>          | 1 | 0.13 | 0.12 | 0.03 | 0.03 | 0     |
| 520 | 2079   | ERH     | <a href="#">sp P84090 ERH_HUMAN</a>           | 1 | 0.13 | 0.12 | 0.03 | 0.03 | -0.38 |
| 521 | 8667   | EIF3H   | <a href="#">sp O15372 EIF3H_HUMAN</a>         | 1 | 0.13 | 0.12 | 0.03 | 0.03 | -0.86 |
| 522 | 5713   | PSMD7   | <a href="#">sp P51665 PSD7_HUMAN</a>          | 1 | 0.13 | 0.12 | 0.03 | 0.03 | -0.32 |
| 523 | 27335  | EIF3K   | <a href="#">sp Q9UBQ5 EIF3K_HUMAN</a>         | 1 | 0.13 | 0.13 | 0.03 | 0.03 |       |
